# Supplementary material for: Differentiation of Bifidobacterium longum subspecies longum and infantis by quantitative PCR using functional gene targets
Source: PeerJ. 2017 May 25;5:e3375. doi: 10.7717/peerj.3375 (PMC5446769; doi:10.7717/peerj.3375)
Supplement: Data S1 [file peerj-05-3375-s002.xlsx]

## Sheet: Universal_P1
Block Type	384-Well Block
Calibration Background is expired	Yes
Calibration Background performed on	2015-09-28 10:38:58 AM NZDT
Calibration FAM is expired	Yes
Calibration FAM performed on	2015-09-28 12:44:37 PM NZDT
Calibration NED is expired	Yes
Calibration NED performed on	2015-09-28 12:27:45 PM NZDT
Calibration ROI is expired	Yes
Calibration ROI performed on	2015-09-28 10:31:42 AM NZDT
Calibration ROX is expired	Yes
Calibration ROX performed on	2015-09-28 11:50:26 AM NZDT
Calibration SYBR is expired	Yes
Calibration SYBR performed on	2015-09-28 11:35:56 AM NZDT
Calibration TAMRA is expired	Yes
Calibration TAMRA performed on	2015-09-28 12:05:53 PM NZDT
Calibration Uniformity is expired	Yes
Calibration Uniformity performed on	2015-09-28 11:17:29 AM NZDT
Calibration VIC is expired	Yes
Calibration VIC performed on	2015-09-28 12:36:53 PM NZDT
Chemistry	SYBR_GREEN
Experiment File Name	E:\Taq sialidase - Kinase comparisons\05-Sing infants 384 p1 sybr.eds
Experiment Name	Singapore infants 384 plate 1
Experiment Run Start Time	2016-06-25 02:06:17 AM NZST
Experiment Run Stop Time	2016-06-25 03:17:48 AM NZST
Experiment Type	Standard Curve
Instrument Name	ViiA7
Instrument Serial Number	278880388
Instrument Type	ViiA(TM) 7 System
Passive Reference	ROX
Quantification Cycle Method	Ct
Signal Smoothing On	true
Stage/ Cycle where Analysis is performed	Stage 2, Step 2
Well Position	Sample Name	Task	Reporter	CT	Ct Mean	Ct SD	Quant by formula	Av. Q/formula	SD Q/formula	Baseline Start	Baseline End	Tm1	Tm2
A1	2-2	UNKNOWN	SYBR	7.6645	7.72069	0.079462	1.02117e+07	9.8485e+06	513615	3	5	83.0413
B1	2-2	UNKNOWN	SYBR	7.77687	7.72069	0.079462	9.48532e+06			3	5	82.7727
C1	2-5	UNKNOWN	SYBR	11.7411	11.7567	0.0220512	702461	695342	10067.4	3	8	83.1756
D1	2-5	UNKNOWN	SYBR	11.7722	11.7567	0.0220512	688224			3	8	82.907
E1	2-7	UNKNOWN	SYBR	10.5365	10.4805	0.0791383	1.54928e+06	1.60835e+06	83536.1	3	7	83.1756
F1	2-7	UNKNOWN	SYBR	10.4245	10.4805	0.0791383	1.66742e+06			3	7	83.0413
G1	3-1	UNKNOWN	SYBR	13.4362	13.4766	0.0570965	230794	224835	8427.11	3	9	83.4442
H1	3-1	UNKNOWN	SYBR	13.517	13.4766	0.0570965	218876			3	9	83.3099
I1	3-5	UNKNOWN	SYBR	10.9806	11.0644	0.118493	1.15739e+06	1.09709e+06	85271.2	3	7	83.0413
J1	3-5	UNKNOWN	SYBR	11.1482	11.0644	0.118493	1.0368e+06			3	7	82.7727
K1	3-7	UNKNOWN	SYBR	9.09457	9.11839	0.0336804	3.99298e+06	3.9315e+06	86936.6	3	6	83.5785
L1	3-7	UNKNOWN	SYBR	9.1422	9.11839	0.0336804	3.87003e+06			3	6	83.3099
M1	4-2	UNKNOWN	SYBR	8.78971	8.86388	0.104888	4.87787e+06	4.65153e+06	320096	3	6	83.7128
N1	4-2	UNKNOWN	SYBR	8.93805	8.86388	0.104888	4.42519e+06			3	6	83.3099
O1	4-5	UNKNOWN	SYBR	7.94362	8.04822	0.147926	8.50164e+06	7.95607e+06	771553	3	5	82.7727
P1	4-5	UNKNOWN	SYBR	8.15282	8.04822	0.147926	7.4105e+06			3	5	82.5041
A2	4-7	UNKNOWN	SYBR	9.5691	9.53379	0.0499234	2.92403e+06	2.9934e+06	98107	3	6	83.7128
B2	4-7	UNKNOWN	SYBR	9.49849	9.53379	0.0499234	3.06277e+06			3	6	83.7128
C2	7-2	UNKNOWN	SYBR	7.89296	7.93396	0.0579802	8.78919e+06	8.55884e+06	325758	3	5	83.8471
D2	7-2	UNKNOWN	SYBR	7.97496	7.93396	0.0579802	8.32849e+06			3	5	83.8471
E2	7-5	UNKNOWN	SYBR	10.8418	10.7765	0.0923751	1.26778e+06	1.32455e+06	80290.1	3	7	82.907
F2	7-5	UNKNOWN	SYBR	10.7112	10.7765	0.0923751	1.38133e+06			3	7	83.0413
G2	7-7	UNKNOWN	SYBR	9.40383	9.38493	0.0267272	3.25918e+06	3.30013e+06	57911.1	3	6	84.7872
H2	7-7	UNKNOWN	SYBR	9.36603	9.38493	0.0267272	3.34108e+06			3	6	84.9215
I2	10-1	UNKNOWN	SYBR	9.38628	9.38628	0	3.29696e+06	1.64848e+06	2.33131e+06	3	6	83.3099
J2	10-1	UNKNOWN	SYBR	33.1298	21.258	16.7892	0.558999			3	28	76.4605
K2	10-5	UNKNOWN	SYBR	12.361	12.3395	0.0304017	467577	474271	9466.73	3	8	83.4442
L2	10-5	UNKNOWN	SYBR	12.318	12.3395	0.0304017	480965			3	8	83.4442
M2	10-7	UNKNOWN	SYBR	11.9689	11.9906	0.0306843	604848	596353	12014.2	3	8	83.8471
N2	10-7	UNKNOWN	SYBR	12.0123	11.9906	0.0306843	587858			3	9	83.7128
O2	11-1	UNKNOWN	SYBR	10.2703	10.1239	0.207069	1.84515e+06	2.04075e+06	276614	3	7	82.907
P2	11-1	UNKNOWN	SYBR	9.97744	10.1239	0.207069	2.23634e+06			3	6	82.7727
A3	11-5	UNKNOWN	SYBR	9.54577	9.56575	0.0282627	2.96916e+06	2.9307e+06	54382.6	3	6	83.5785	80.3552
B3	11-5	UNKNOWN	SYBR	9.58574	9.56575	0.0282627	2.89225e+06			3	6	83.5785	80.3552
C3	11-7	UNKNOWN	SYBR	10.1717	10.1272	0.0629458	1.96853e+06	2.02778e+06	83785.6	3	7	83.3099
D3	11-7	UNKNOWN	SYBR	10.0827	10.1272	0.0629458	2.08702e+06			3	7	83.5785
E3	13-1	UNKNOWN	SYBR	15.7041	15.78	0.107371	52061.6	49591.5	3493.31	3	11	83.1756
F3	13-1	UNKNOWN	SYBR	15.856	15.78	0.107371	47121.3			3	12	83.3099
G3	13-5	UNKNOWN	SYBR	10.7005	10.7017	0.00167374	1.39106e+06	1.38998e+06	1527.55	3	7	83.7128
H3	13-5	UNKNOWN	SYBR	10.7029	10.7017	0.00167374	1.3889e+06			3	7	83.7128
I3	13-7	UNKNOWN	SYBR	12.3075	12.3342	0.0378405	484291	475930	11824	3	8	83.0413
J3	13-7	UNKNOWN	SYBR	12.361	12.3342	0.0378405	467569			3	8	82.907
K3	14-1	UNKNOWN	SYBR	18.8024	18.8089	0.00915092	6807.89	6779.09	40.7311	3	14	83.5785
L3	14-1	UNKNOWN	SYBR	18.8153	18.8089	0.00915092	6750.29			3	14	83.7128
M3	14-5	UNKNOWN	SYBR	8.5725	8.59184	0.0273476	5.62561e+06	5.55508e+06	99744.1	3	5	83.5785
N3	14-5	UNKNOWN	SYBR	8.61118	8.59184	0.0273476	5.48455e+06			3	5	83.5785
O3	14-7	UNKNOWN	SYBR	9.57276	9.63287	0.0850186	2.91701e+06	2.80629e+06	156576	3	6	83.3099
P3	14-7	UNKNOWN	SYBR	9.69299	9.63287	0.0850186	2.69558e+06			3	6	83.3099
A4	16-1	UNKNOWN	SYBR	28.2274	28.3155	0.12462	13.9755	13.2119	1.07987	3	24	83.0413
B4	16-1	UNKNOWN	SYBR	28.4037	28.3155	0.12462	12.4483			3	24	83.4442
C4	16-5	UNKNOWN	SYBR	9.51446	9.48788	0.0375882	3.03083e+06	3.08466e+06	76123.9	3	6	83.5785
D4	16-5	UNKNOWN	SYBR	9.4613	9.48788	0.0375882	3.13848e+06			3	6	83.5785
E4	16-7	UNKNOWN	SYBR	9.82073	9.78143	0.0555745	2.47871e+06	2.54435e+06	92823.7	3	6	83.3099
F4	16-7	UNKNOWN	SYBR	9.74213	9.78143	0.0555745	2.60998e+06			3	6	83.3099
G4	19-1	UNKNOWN	SYBR	10.7665	10.8022	0.0505486	1.33208e+06	1.30154e+06	43190.7	3	7	84.1157
H4	19-1	UNKNOWN	SYBR	10.838	10.8022	0.0505486	1.271e+06			3	7	83.9814
I4	19-5	UNKNOWN	SYBR	8.18116	8.21585	0.049063	7.27386e+06	7.11189e+06	229068	3	5	80.8924	83.3099
J4	19-5	UNKNOWN	SYBR	8.25055	8.21585	0.049063	6.94991e+06			3	5	80.8924	83.3099
K4	19-7	UNKNOWN	SYBR	7.3331	7.30868	0.0345345	1.2694e+07	1.29008e+07	292508	3	5	80.7581
L4	19-7	UNKNOWN	SYBR	7.28426	7.30868	0.0345345	1.31077e+07			3	5	80.7581
M4	25-1	UNKNOWN	SYBR	7.66175	7.88959	0.322219	1.02301e+07	8.90742e+06	1.87062e+06	3	5	83.8471
N4	25-1	UNKNOWN	SYBR	8.11743	7.88959	0.322219	7.58469e+06			3	5	83.7128
O4	25-5	UNKNOWN	SYBR	6.29874	6.29727	0.00207362	2.50355e+07	2.50597e+07	34118.4	3	4	83.5785
P4	25-5	UNKNOWN	SYBR	6.29581	6.29727	0.00207362	2.50838e+07			3	4	83.7128
A5	25-7	UNKNOWN	SYBR	9.15235	9.31495	0.229946	3.84433e+06	3.47476e+06	522650	3	6	83.4442
B5	25-7	UNKNOWN	SYBR	9.47754	9.31495	0.229946	3.10519e+06			3	6	83.4442
C5	27-1	UNKNOWN	SYBR	9.44213	9.32436	0.166552	3.17824e+06	3.44403e+06	375885	3	6	83.1756
D5	27-1	UNKNOWN	SYBR	9.20659	9.32436	0.166552	3.70982e+06			3	6	83.1756
E5	27-5	UNKNOWN	SYBR	12.8264	12.8661	0.0561585	344445	335694	12375.5	3	9	83.1756
F5	27-5	UNKNOWN	SYBR	12.9058	12.8661	0.0561585	326943			3	9	83.1756
G5	27-7	UNKNOWN	SYBR	9.46736	9.63811	0.241476	3.12603e+06	2.81207e+06	444006	3	6	83.5785
H5	27-7	UNKNOWN	SYBR	9.80886	9.63811	0.241476	2.49811e+06			3	6	82.7727
I5	32-2	UNKNOWN	SYBR	10.586	10.5614	0.0348814	1.49967e+06	1.52435e+06	34909.2	3	7	83.8471
J5	32-2	UNKNOWN	SYBR	10.5367	10.5614	0.0348814	1.54904e+06			3	7	83.8471
K5	32-5	UNKNOWN	SYBR	9.51106	9.52515	0.0199223	3.0376e+06	3.00976e+06	39369.3	3	6	83.7128
L5	32-5	UNKNOWN	SYBR	9.53924	9.52515	0.0199223	2.98192e+06			3	6	83.5785
M5	32-7	UNKNOWN	SYBR	10.8227	10.6219	0.284045	1.2838e+06	1.47753e+06	273982	3	7	83.4442
N5	32-7	UNKNOWN	SYBR	10.421	10.6219	0.284045	1.67126e+06			3	7	83.5785
O5	40-1	UNKNOWN	SYBR	8.25426	8.24154	0.0179997	6.93297e+06	6.9914e+06	82629.2	3	5	83.0413
P5	40-1	UNKNOWN	SYBR	8.22881	8.24154	0.0179997	7.04983e+06			3	5	82.907
A6	40-5	UNKNOWN	SYBR	12.904	12.7072	0.278295	327344	375608	68255.4	3	9	84.7872
B6	40-5	UNKNOWN	SYBR	12.5104	12.7072	0.278295	423872			3	9	86.1302
C6	40-7	UNKNOWN	SYBR	11.1203	10.7135	0.575312	1.05596e+06	1.42878e+06	527244	3	7	83.3099
D6	40-7	UNKNOWN	SYBR	10.3067	10.7135	0.575312	1.80159e+06			3	7	85.0558
E6	43-1	UNKNOWN	SYBR	10.5058	10.1113	0.557917	1.58073e+06	2.11722e+06	758711	3	7	82.5041
F6	43-1	UNKNOWN	SYBR	9.71683	10.1113	0.557917	2.65371e+06			3	6	83.8471
G6	43-5	UNKNOWN	SYBR	16.646	16.5263	0.169242	28049.4	30436.1	3375.27	3	12	82.6384
H6	43-5	UNKNOWN	SYBR	16.4067	16.5263	0.169242	32822.8			3	12	83.8471
I6	43-7	UNKNOWN	SYBR	15.1165	14.9314	0.261738	76573.2	87106.8	14896.8	3	11	82.7727
J6	43-7	UNKNOWN	SYBR	14.7464	14.9314	0.261738	97640.5			3	11	84.1157
K6	55-1	UNKNOWN	SYBR	8.67607	8.44891	0.321255	5.25577e+06	6.16918e+06	1.29175e+06	3	6	82.6384
L6	55-1	UNKNOWN	SYBR	8.22175	8.44891	0.321255	7.08258e+06			3	6	83.7128
M6	55-5	UNKNOWN	SYBR	12.6912	12.5792	0.158426	376422	406250	42183.3	3	9	83.8471
N6	55-5	UNKNOWN	SYBR	12.4672	12.5792	0.158426	436078			3	9	85.1901
O6	55-7	UNKNOWN	SYBR	9.91414	9.81674	0.137746	2.33125e+06	2.49029e+06	224929	3	6	83.1756
P6	55-7	UNKNOWN	SYBR	9.71934	9.81674	0.137746	2.64934e+06			3	7	84.25
A7	59-1	UNKNOWN	SYBR	25.6015	25.6004	0.00168992	78.3725	78.434	0.0870346	3	21	82.2355
B7	59-1	UNKNOWN	SYBR	25.5992	25.6004	0.00168992	78.4956			3	21	82.2355
C7	59-5	UNKNOWN	SYBR	13.3533	13.3154	0.0535609	243720	249934	8787.96	3	9	83.9814
D7	59-5	UNKNOWN	SYBR	13.2775	13.3154	0.0535609	256148			3	9	83.5785
E7	59-7	UNKNOWN	SYBR	10.7325	10.7691	0.051695	1.36211e+06	1.33019e+06	45142.4	3	7	83.7128
F7	59-7	UNKNOWN	SYBR	10.8057	10.7691	0.051695	1.29827e+06			3	7	83.7128
G7	70-1	UNKNOWN	SYBR	Undetermined	17.8255		12929.7	12929.7	0.00240067	3	39	61.4187
H7	70-1	UNKNOWN	SYBR	17.8255	17.8255		12929.7			3	12	61.0158
I7	70-5	UNKNOWN	SYBR	10.9968	11.0376	0.0576825	1.14511e+06	1.11525e+06	42229.5	3	7	85.1901
J7	70-5	UNKNOWN	SYBR	11.0784	11.0376	0.0576825	1.08539e+06			3	7	85.1901
K7	70-7	UNKNOWN	SYBR	8.82183	8.85418	0.0457465	4.77608e+06	4.67676e+06	140456	3	6	85.0558
L7	70-7	UNKNOWN	SYBR	8.88653	8.85418	0.0457465	4.57745e+06			3	6	84.7872
M7	73-1	UNKNOWN	SYBR	13.983	14.0299	0.0663203	161176	156362	6806.85	3	10	84.1157
N7	73-1	UNKNOWN	SYBR	14.0768	14.0299	0.0663203	151549			3	10	84.1157
O7	73-5	UNKNOWN	SYBR	11.6642	11.4871	0.250507	738812	835558	136820	3	8	84.1157
P7	73-5	UNKNOWN	SYBR	11.31	11.4871	0.250507	932304			3	8	83.8471
A8	73-7	UNKNOWN	SYBR	10.5388	10.5588	0.0283132	1.54689e+06	1.52682e+06	28383	3	7	83.8471
B8	73-7	UNKNOWN	SYBR	10.5788	10.5588	0.0283132	1.50675e+06			3	7	83.7128
C8	74-2	UNKNOWN	SYBR	17.7428	17.7628	0.028208	13650.7	13474.3	249.549	3	13	84.9215
D8	74-2	UNKNOWN	SYBR	17.7827	17.7628	0.028208	13297.8			3	14	84.7872
E8	74-5	UNKNOWN	SYBR	9.39752	9.37968	0.02522	3.27272e+06	3.31149e+06	54833.8	3	6	83.0413
F8	74-5	UNKNOWN	SYBR	9.36185	9.37968	0.02522	3.35027e+06			3	6	83.0413
G8	74-7	UNKNOWN	SYBR	9.48099	9.40866	0.102289	3.09818e+06	3.25254e+06	218289	3	6	84.3843
H8	74-7	UNKNOWN	SYBR	9.33633	9.40866	0.102289	3.40689e+06			3	6	84.25
I8	87-1	UNKNOWN	SYBR	8.5058	8.484	0.0308259	5.8775e+06	5.96284e+06	120684	3	5	83.3099
J8	87-1	UNKNOWN	SYBR	8.4622	8.484	0.0308259	6.04817e+06			3	5	83.3099
K8	87-5	UNKNOWN	SYBR	15.227	15.286	0.0835202	71217.4	68560.2	3757.93	3	11	83.9814
L8	87-5	UNKNOWN	SYBR	15.3451	15.286	0.0835202	65902.9			3	11	83.9814
M8	87-7	UNKNOWN	SYBR	13.23	13.2322	0.00321328	264268	263874	556.704	3	9	83.0413
N8	87-7	UNKNOWN	SYBR	13.2345	13.2322	0.00321328	263481			3	9	83.1756
O8	92-1	UNKNOWN	SYBR	10.8185	10.7869	0.0446312	1.28741e+06	1.31464e+06	38520.2	3	7	83.8471
P8	92-1	UNKNOWN	SYBR	10.7553	10.7869	0.0446312	1.34188e+06			3	7	83.5785
A9	92-5	UNKNOWN	SYBR	11.5113	11.3932	0.166997	816855	885364	96887	3	8	83.8471
B9	92-5	UNKNOWN	SYBR	11.2751	11.3932	0.166997	953874			3	8	83.8471
C9	92-7	UNKNOWN	SYBR	10.4491	10.4264	0.0321395	1.64075e+06	1.6656e+06	35146.4	3	7	83.7128
D9	92-7	UNKNOWN	SYBR	10.4036	10.4264	0.0321395	1.69045e+06			3	7	83.5785
E9	100-1	UNKNOWN	SYBR	13.9915	13.9744	0.0242139	160281	162103	2577.2	3	10	82.3698
F9	100-1	UNKNOWN	SYBR	13.9573	13.9744	0.0242139	163926			3	10	82.3698
G9	100-5	UNKNOWN	SYBR	9.00503	9.09752	0.130793	4.23477e+06	3.99261e+06	342461	3	6	83.3099
H9	100-5	UNKNOWN	SYBR	9.19	9.09752	0.130793	3.75046e+06			3	6	83.1756
I9	100-7	UNKNOWN	SYBR	9.12007	9.03503	0.120261	3.92669e+06	4.15866e+06	328046	3	6	82.907
J9	100-7	UNKNOWN	SYBR	8.94999	9.03503	0.120261	4.39062e+06			3	6	82.907
K9	103-1	UNKNOWN	SYBR	7.49207	7.59749	0.149083	1.14358e+07	1.06966e+07	1.0454e+06	3	5	83.1756	85.9959
L9	103-1	UNKNOWN	SYBR	7.70291	7.59749	0.149083	9.95736e+06			3	5	83.0413	85.7273
M9	103-5	UNKNOWN	SYBR	8.97372	8.97672	0.00423694	4.32273e+06	4.31424e+06	12002.3	3	6	83.7128
N9	103-5	UNKNOWN	SYBR	8.97972	8.97672	0.00423694	4.30575e+06			3	6	83.7128
O9	103-7	UNKNOWN	SYBR	10.6276	10.5771	0.0714433	1.45929e+06	1.50933e+06	70776.9	3	7	84.9215
P9	103-7	UNKNOWN	SYBR	10.5266	10.5771	0.0714433	1.55938e+06			3	7	84.9215
A10	111-1	UNKNOWN	SYBR	13.4348	13.504	0.0978313	231010	220979	14185.2	3	9	83.9814
B10	111-1	UNKNOWN	SYBR	13.5732	13.504	0.0978313	210949			3	10	83.9814
C10	111-5	UNKNOWN	SYBR	9.36612	9.50673	0.198863	3.3409e+06	3.05924e+06	398327	3	6	83.8471
D10	111-5	UNKNOWN	SYBR	9.64735	9.50673	0.198863	2.77758e+06			3	6	83.5785
E10	111-7	UNKNOWN	SYBR	9.70475	9.68534	0.0274494	2.67485e+06	2.70938e+06	48829.2	3	6	83.7128
F10	111-7	UNKNOWN	SYBR	9.66593	9.68534	0.0274494	2.7439e+06			3	6	83.7128
G10	116-1	UNKNOWN	SYBR	10.5712	10.5761	0.00692152	1.51429e+06	1.50944e+06	6860.27	3	7	84.25
H10	116-1	UNKNOWN	SYBR	10.581	10.5761	0.00692152	1.50459e+06			3	7	84.1157
I10	116-5	UNKNOWN	SYBR	9.45775	9.3837	0.104714	3.14582e+06	3.30644e+06	227158	3	6	83.8471
J10	116-5	UNKNOWN	SYBR	9.30966	9.3837	0.104714	3.46707e+06			3	6	83.8471
K10	116-7	UNKNOWN	SYBR	8.91826	9.01393	0.135293	4.48305e+06	4.21842e+06	374247	3	6	83.9814
L10	116-7	UNKNOWN	SYBR	9.1096	9.01393	0.135293	3.95378e+06			3	6	83.8471
M10	121-2	UNKNOWN	SYBR	14.1863	14.1877	0.00194617	141041	140914	180.049	3	10	82.7727
N10	121-2	UNKNOWN	SYBR	14.189	14.1877	0.00194617	140786			3	10	82.7727
O10	121-5	UNKNOWN	SYBR	10.8681	10.8894	0.0301117	1.24608e+06	1.2289e+06	24295.4	3	7	83.7128
P10	121-5	UNKNOWN	SYBR	10.9107	10.8894	0.0301117	1.21172e+06			3	7	83.7128
A11	121-7	UNKNOWN	SYBR	9.28229	9.40034	0.166941	3.52993e+06	3.27648e+06	358434	3	6	83.7128
B11	121-7	UNKNOWN	SYBR	9.51838	9.40034	0.166941	3.02303e+06			3	6	83.5785
C11	136-1	UNKNOWN	SYBR	13.3318	13.3872	0.0783749	247176	238501	12268.2	3	9	83.8471
D11	136-1	UNKNOWN	SYBR	13.4426	13.3872	0.0783749	229826			3	10	83.8471
E11	136-5	UNKNOWN	SYBR	9.95451	9.89774	0.0802874	2.27027e+06	2.35813e+06	124257	3	7	83.5785
F11	136-5	UNKNOWN	SYBR	9.84097	9.89774	0.0802874	2.44599e+06			3	6	83.7128
G11	136-7	UNKNOWN	SYBR	9.92672	10.0276	0.142731	2.31208e+06	2.16858e+06	202938	3	6	83.9814
H11	136-7	UNKNOWN	SYBR	10.1286	10.0276	0.142731	2.02508e+06			3	6	83.8471
I11	140-1	UNKNOWN	SYBR	10.3039	10.2882	0.022176	1.80492e+06	1.8237e+06	26553.2	3	7	83.5785
J11	140-1	UNKNOWN	SYBR	10.2725	10.2882	0.022176	1.84247e+06			3	6	83.4442
K11	140-5	UNKNOWN	SYBR	12.2966	12.3225	0.0366138	487769	479616	11529.2	3	8	85.7273
L11	140-5	UNKNOWN	SYBR	12.3484	12.3225	0.0366138	471464			3	8	85.593
M11	140-7	UNKNOWN	SYBR	9.67016	9.69895	0.0407179	2.73629e+06	2.68553e+06	71790.9	3	6	84.1157
N11	140-7	UNKNOWN	SYBR	9.72774	9.69895	0.0407179	2.63476e+06			3	6	83.8471
O11	149-2	UNKNOWN	SYBR	11.9747	11.6707	0.42988	602555	750362	209030	3	8	83.8471
P11	149-2	UNKNOWN	SYBR	11.3668	11.6707	0.42988	898168			3	8	83.7128
A13	149-5	UNKNOWN	SYBR	9.93897	10.0456	0.150742	2.29354e+06	2.14375e+06	211839	3	6	83.5785
B13	149-5	UNKNOWN	SYBR	10.1522	10.0456	0.150742	1.99396e+06			3	7	83.5785
C13	149-7	UNKNOWN	SYBR	10.2459	10.1073	0.195992	1.87496e+06	2.06209e+06	264639	3	7	83.5785
D13	149-7	UNKNOWN	SYBR	9.9687	10.1073	0.195992	2.24921e+06			3	6	83.5785
E13	153-2	UNKNOWN	SYBR	9.91187	10.1027	0.269844	2.33473e+06	2.07599e+06	365915	3	6	83.7128
F13	153-2	UNKNOWN	SYBR	10.2935	10.1027	0.269844	1.81725e+06			3	7	83.7128
G13	153-5	UNKNOWN	SYBR	10.8607	10.733	0.180672	1.25215e+06	1.36651e+06	161730	3	8	83.5785
H13	153-5	UNKNOWN	SYBR	10.6052	10.733	0.180672	1.48087e+06			3	7	83.4442
I13	153-7	UNKNOWN	SYBR	10.8623	10.9362	0.104434	1.25085e+06	1.19304e+06	81744.7	3	7	83.8471
J13	153-7	UNKNOWN	SYBR	11.01	10.9362	0.104434	1.13524e+06			3	7	83.5785
K13	154-1	UNKNOWN	SYBR	13.5151	13.5545	0.0557188	219145	213620	7813.68	3	9	83.9814
L13	154-1	UNKNOWN	SYBR	13.5939	13.5545	0.0557188	208095			3	10	83.8471
M13	154-5	UNKNOWN	SYBR	9.9252	9.91725	0.0112428	2.31438e+06	2.32652e+06	17173.7	3	6	83.7128
N13	154-5	UNKNOWN	SYBR	9.9093	9.91725	0.0112428	2.33867e+06			3	6	83.5785
O13	154-7	UNKNOWN	SYBR	6.67588	6.74491	0.0976219	1.9544e+07	1.86971e+07	1.19765e+06	3	5	83.9814
P13	154-7	UNKNOWN	SYBR	6.81393	6.74491	0.0976219	1.78502e+07			3	5	83.9814
A14	157-1	UNKNOWN	SYBR	10.5203	10.5337	0.0188245	1.56575e+06	1.55218e+06	19184.3	3	7	83.5785
B14	157-1	UNKNOWN	SYBR	10.547	10.5337	0.0188245	1.53862e+06			3	7	83.5785
C14	157-5	UNKNOWN	SYBR	9.5442	9.62819	0.118777	2.97222e+06	2.81703e+06	219477	3	6	83.7128
D14	157-5	UNKNOWN	SYBR	9.71217	9.62819	0.118777	2.66184e+06			3	6	83.7128
E14	157-7	UNKNOWN	SYBR	10.5863	10.5792	0.00995138	1.49943e+06	1.50639e+06	9842.99	3	7	83.7128
F14	157-7	UNKNOWN	SYBR	10.5722	10.5792	0.00995138	1.51335e+06			3	7	83.7128
G14	158-1	UNKNOWN	SYBR	9.58038	9.5271	0.0753559	2.90244e+06	3.00762e+06	148753	3	6	83.8471
H14	158-1	UNKNOWN	SYBR	9.47381	9.5271	0.0753559	3.11281e+06			3	6	83.8471
I14	159-1	UNKNOWN	SYBR	16.8573	16.8488	0.0119265	24416.6	24552.6	192.274	3	13	82.5041
J14	159-1	UNKNOWN	SYBR	16.8404	16.8488	0.0119265	24688.5			3	13	82.3698
K14	159-5	UNKNOWN	SYBR	12.2083	12.0385	0.240083	516872	581414	91276.4	3	8	83.1756
L14	159-5	UNKNOWN	SYBR	11.8688	12.0385	0.240083	645956			3	8	83.4442
M14	159-7	UNKNOWN	SYBR	12.1235	12.1787	0.0780917	546479	527367	27029	3	8	83.5785
N14	159-7	UNKNOWN	SYBR	12.2339	12.1787	0.0780917	508254			3	8	83.5785
O14	160-1	UNKNOWN	SYBR	9.67865	9.64372	0.0493907	2.72109e+06	2.78494e+06	90300.3	3	6	84.1157
P14	160-1	UNKNOWN	SYBR	9.6088	9.64372	0.0493907	2.84879e+06			3	6	83.8471
A15	160-5	UNKNOWN	SYBR	12.7792	12.7442	0.0493995	355305	363644	11793.1	3	9	83.5785
B15	160-5	UNKNOWN	SYBR	12.7093	12.7442	0.0493995	371983			3	9	83.7128
C15	160-7	UNKNOWN	SYBR	10.8131	10.9753	0.229351	1.29191e+06	1.16801e+06	175232	3	8	83.9814
D15	160-7	UNKNOWN	SYBR	11.1375	10.9753	0.229351	1.0441e+06			3	8	83.8471
E15	162-1	UNKNOWN	SYBR	8.95086	9.25727	0.433326	4.3881e+06	3.66128e+06	1.02789e+06	3	5	83.0413
F15	162-1	UNKNOWN	SYBR	9.56368	9.25727	0.433326	2.93445e+06			3	6	83.1756
G15	162-5	UNKNOWN	SYBR	11.1602	11.0723	0.124349	1.02864e+06	1.0916e+06	89028	3	7	83.3099
H15	162-5	UNKNOWN	SYBR	10.9843	11.0723	0.124349	1.15455e+06			3	7	83.3099
I15	162-7	UNKNOWN	SYBR	11.0629	10.7176	0.488429	1.09648e+06	1.4111e+06	444947	3	8	83.7128
J15	162-7	UNKNOWN	SYBR	10.3722	10.7176	0.488429	1.72573e+06			3	6	83.7128
K15	165-1	UNKNOWN	SYBR	8.90379	8.95747	0.0759136	4.52586e+06	4.37183e+06	217825	3	6	83.3099
L15	165-1	UNKNOWN	SYBR	9.01115	8.95747	0.0759136	4.21781e+06			3	6	83.1756
M15	165-5	UNKNOWN	SYBR	12.7966	12.7743	0.0314598	351259	356465	7362.89	3	9	83.4442
N15	165-5	UNKNOWN	SYBR	12.7521	12.7743	0.0314598	361672			3	9	83.4442
O15	165-7	UNKNOWN	SYBR	13.5731	13.4957	0.109388	210960	222238	15948.5	3	10	84.25
P15	165-7	UNKNOWN	SYBR	13.4184	13.4957	0.109388	233515			3	9	84.25
A16	166-2	UNKNOWN	SYBR	11.7641	11.7495	0.0206257	691923	698613	9460.94	3	8	83.0413
B16	166-2	UNKNOWN	SYBR	11.7349	11.7495	0.0206257	705303			3	8	83.0413
C16	166-5	UNKNOWN	SYBR	12.4817	12.4525	0.0412486	431937	440369	11925.7	3	9	83.0413
D16	166-5	UNKNOWN	SYBR	12.4234	12.4525	0.0412486	448802			3	8	83.0413
E16	166-7	UNKNOWN	SYBR	8.20624	8.1664	0.0563473	7.15507e+06	7.34725e+06	271771	3	5	83.8471
F16	166-7	UNKNOWN	SYBR	8.12655	8.1664	0.0563473	7.53942e+06			3	5	83.7128
G16	169-1	UNKNOWN	SYBR	8.51665	8.48189	0.0491594	5.83575e+06	5.97203e+06	192734	3	5	83.4442
H16	169-1	UNKNOWN	SYBR	8.44713	8.48189	0.0491594	6.10832e+06			3	5	83.4442
I16	169-5	UNKNOWN	SYBR	8.43052	8.39427	0.0512668	6.17529e+06	6.32584e+06	212900	3	5	83.1756
J16	169-5	UNKNOWN	SYBR	8.35802	8.39427	0.0512668	6.47638e+06			3	5	83.0413
K16	169-7	UNKNOWN	SYBR	8.27356	8.26937	0.00594035	6.84566e+06	6.8646e+06	26775.3	3	5	83.1756
L16	169-7	UNKNOWN	SYBR	8.26516	8.26937	0.00594035	6.88353e+06			3	5	83.0413
M16	173-1	UNKNOWN	SYBR	12.1052	12.1077	0.00352145	553083	552180	1276.73	3	8	83.9814
N16	173-1	UNKNOWN	SYBR	12.1102	12.1077	0.00352145	551277			3	8	83.9814
O16	175-2	UNKNOWN	SYBR	7.91434	7.67501	0.338462	8.66667e+06	1.02669e+07	2.26308e+06	3	5	83.3099
P16	175-2	UNKNOWN	SYBR	7.43568	7.67501	0.338462	1.18672e+07			3	5	83.3099
A17	175-5	UNKNOWN	SYBR	6.43096	6.51222	0.114913	2.29537e+07	2.17922e+07	1.64271e+06	3	5	82.907
B17	175-5	UNKNOWN	SYBR	6.59347	6.51222	0.114913	2.06306e+07			3	5	83.0413
C17	175-7	UNKNOWN	SYBR	6.57783	6.7581	0.254937	2.08436e+07	1.86467e+07	3.10683e+06	3	5	83.1756
D17	175-7	UNKNOWN	SYBR	6.93836	6.7581	0.254937	1.64498e+07			3	5	83.0413
E17	177-1	UNKNOWN	SYBR	14.4318	14.4209	0.0153428	120045	120907	1218.01	3	10	83.8471
F17	177-1	UNKNOWN	SYBR	14.4101	14.4209	0.0153428	121768			3	10	83.7128
G17	181-1	UNKNOWN	SYBR	15.9265	15.9391	0.0177839	44988.3	44619.8	521.01	3	12	83.9814
H17	181-1	UNKNOWN	SYBR	15.9517	15.9391	0.0177839	44251.4			3	12	83.8471
I17	181-5	UNKNOWN	SYBR	10.9319	10.933	0.0014485	1.19496e+06	1.19416e+06	1135.49	3	7	84.1157
J17	181-5	UNKNOWN	SYBR	10.934	10.933	0.0014485	1.19336e+06			3	7	84.1157
K17	181-7	UNKNOWN	SYBR	8.73814	8.66887	0.0979661	5.04588e+06	5.28615e+06	339798	3	5	83.5785
L17	181-7	UNKNOWN	SYBR	8.5996	8.66887	0.0979661	5.52643e+06			3	5	83.4442
A24	AB78	UNKNOWN	SYBR	8.648	8.68971	0.0589904	5.35355e+06	5.21086e+06	201784	3	5	85.7273
B24	AB78	UNKNOWN	SYBR	8.73142	8.68971	0.0589904	5.06818e+06			3	6	85.7273
C24	AB79	UNKNOWN	SYBR	7.53546	7.4236	0.158194	1.11146e+07	1.19939e+07	1.24358e+06	3	6	83.8471
D24	AB79	UNKNOWN	SYBR	7.31174	7.4236	0.158194	1.28733e+07			3	6	83.9814
E24	AB80	UNKNOWN	SYBR	11.918	11.8212	0.13686	625421	667798	59929.6	3	8	82.907
F24	AB80	UNKNOWN	SYBR	11.7244	11.8212	0.13686	710174			3	8	82.907
G24	AB81	UNKNOWN	SYBR	13.4661	13.3175	0.210083	226319	250695	34472.1	3	9	83.5785
H24	AB81	UNKNOWN	SYBR	13.169	13.3175	0.210083	275070			3	9	83.5785
I24	AB82	UNKNOWN	SYBR	6.34702	6.6119	0.374596	2.42543e+07	2.06914e+07	5.03861e+06	3	5	83.7128
J24	AB82	UNKNOWN	SYBR	6.87678	6.6119	0.374596	1.71286e+07			3	5	83.5785
K24	AB83	UNKNOWN	SYBR	9.26366	9.15955	0.147235	3.57337e+06	3.83514e+06	370185	3	6	83.8471
L24	AB83	UNKNOWN	SYBR	9.05544	9.15955	0.147235	4.0969e+06			3	6	83.7128
M24	AB84	UNKNOWN	SYBR	9.64971	9.46645	0.259167	2.77328e+06	3.15056e+06	533559	3	7	84.9215
N24	AB84	UNKNOWN	SYBR	9.28319	9.46645	0.259167	3.52784e+06			3	6	84.7872
O24	AB85	UNKNOWN	SYBR	9.2611	9.22559	0.0502202	3.57939e+06	3.66483e+06	120825	3	6	84.25
P24	AB85	UNKNOWN	SYBR	9.19008	9.22559	0.0502202	3.75027e+06			3	6	84.25
G23	AB86	UNKNOWN	SYBR	8.19272	7.95508	0.336075	7.21888e+06	8.54085e+06	1.86955e+06	3	5	84.25
H23	AB86	UNKNOWN	SYBR	7.71744	7.95508	0.336075	9.86282e+06			3	5	84.25
I23	AB87	UNKNOWN	SYBR	10.9076	10.8651	0.0600495	1.21421e+06	1.24902e+06	49234.6	3	7	83.3099
J23	AB87	UNKNOWN	SYBR	10.8227	10.8651	0.0600495	1.28384e+06			3	7	83.3099
K23	AB88	UNKNOWN	SYBR	10.6466	10.5365	0.155699	1.44123e+06	1.55332e+06	158525	3	7	84.5186
L23	AB88	UNKNOWN	SYBR	10.4264	10.5365	0.155699	1.66541e+06			3	7	84.5186
M23	AB89	UNKNOWN	SYBR	7.56559	7.57388	0.0117269	1.08969e+07	1.08379e+07	83450.4	3	5	84.25
N23	AB89	UNKNOWN	SYBR	7.58218	7.57388	0.0117269	1.07788e+07			3	5	84.25
O23	AB90	UNKNOWN	SYBR	12.4524	12.3308	0.171972	440328	478449	53910.9	3	8	85.1901
P23	AB90	UNKNOWN	SYBR	12.2092	12.3308	0.171972	516570			3	8	85.1901
M17	TH01-1	UNKNOWN	SYBR	7.3267	7.15648	0.240734	1.27475e+07	1.43441e+07	2.25793e+06	3	5	83.5785
N17	TH01-1	UNKNOWN	SYBR	6.98625	7.15648	0.240734	1.59406e+07			3	5	83.5785
O17	TH01-5	UNKNOWN	SYBR	7.91188	7.86161	0.0710957	8.68066e+06	8.97687e+06	418905	3	5	83.4442
P17	TH01-5	UNKNOWN	SYBR	7.81134	7.86161	0.0710957	9.27308e+06			3	5	83.5785
A18	TH01-7	UNKNOWN	SYBR	10.4205	10.4261	0.00793103	1.67186e+06	1.66573e+06	8674.21	3	7	83.3099
B18	TH01-7	UNKNOWN	SYBR	10.4317	10.4261	0.00793103	1.6596e+06			3	7	83.1756
C18	TH03-1	UNKNOWN	SYBR	7.44906	7.17179	0.392116	1.17634e+07	1.43468e+07	3.65353e+06	3	5	84.1157
D18	TH03-1	UNKNOWN	SYBR	6.89452	7.17179	0.392116	1.69302e+07			3	4	84.25
E18	TH03-5	UNKNOWN	SYBR	9.73337	9.78793	0.0771577	2.62504e+06	2.53429e+06	128337	3	6	83.5785
F18	TH03-5	UNKNOWN	SYBR	9.84249	9.78793	0.0771577	2.44354e+06			3	6	83.5785
G18	TH03-7	UNKNOWN	SYBR	10.8573	10.8624	0.007314	1.25501e+06	1.25076e+06	6006.9	3	7	83.8471
H18	TH03-7	UNKNOWN	SYBR	10.8676	10.8624	0.007314	1.24651e+06			3	7	83.8471
I18	TH04-1	UNKNOWN	SYBR	9.16712	8.84361	0.457514	3.80722e+06	4.81489e+06	1.42505e+06	3	6	83.9814
J18	TH04-1	UNKNOWN	SYBR	8.5201	8.84361	0.457514	5.82255e+06			3	5	83.9814
K18	TH04-5	UNKNOWN	SYBR	9.35733	9.36923	0.016823	3.36022e+06	3.33418e+06	36829.1	3	6	83.8471
L18	TH04-5	UNKNOWN	SYBR	9.38112	9.36923	0.016823	3.30814e+06			3	6	83.8471
M18	TH04-7	UNKNOWN	SYBR	11.0394	11.1205	0.114716	1.11355e+06	1.05729e+06	79563.6	3	8	83.8471
N18	TH04-7	UNKNOWN	SYBR	11.2016	11.1205	0.114716	1.00103e+06			3	8	83.8471
O18	TH07-1	UNKNOWN	SYBR	9.525	9.67359	0.210147	3.00994e+06	2.74314e+06	377311	3	6	83.3099
P18	TH07-1	UNKNOWN	SYBR	9.82219	9.67359	0.210147	2.47634e+06			3	6	83.1756
A19	TH07-5	UNKNOWN	SYBR	9.39288	9.54663	0.217433	3.2827e+06	2.98262e+06	424382	3	6	83.1756
B19	TH07-5	UNKNOWN	SYBR	9.70038	9.54663	0.217433	2.68254e+06			3	6	83.3099
C19	TH07-7	UNKNOWN	SYBR	12.4101	12.277	0.188152	452742	495958	61116.1	3	9	82.5041
D19	TH07-7	UNKNOWN	SYBR	12.144	12.277	0.188152	539174			3	8	82.5041
E19	TH10-1	UNKNOWN	SYBR	7.69774	7.77661	0.111539	9.9912e+06	9.49968e+06	695109	3	5	83.1756
F19	TH10-1	UNKNOWN	SYBR	7.85548	7.77661	0.111539	9.00816e+06			3	5	83.1756
G19	TH10-5	UNKNOWN	SYBR	10.4353	10.4803	0.0636114	1.65564e+06	1.60816e+06	67149.5	3	7	82.7727	85.4587
H19	TH10-5	UNKNOWN	SYBR	10.5253	10.4803	0.0636114	1.56068e+06			3	7	82.7727
I19	TH10-7	UNKNOWN	SYBR	8.85134	8.73117	0.169943	4.68445e+06	5.08482e+06	566219	3	6	81.4296
J19	TH10-7	UNKNOWN	SYBR	8.611	8.73117	0.169943	5.4852e+06			3	5	81.2953
K19	TH17-1	UNKNOWN	SYBR	10.8649	10.8008	0.090607	1.24875e+06	1.30355e+06	77506.2	3	7	83.5785
L19	TH17-1	UNKNOWN	SYBR	10.7367	10.8008	0.090607	1.35836e+06			3	7	83.5785
M19	TH17-5	UNKNOWN	SYBR	8.49844	8.5255	0.0382646	5.90596e+06	5.80288e+06	145780	3	5	83.7128
N19	TH17-5	UNKNOWN	SYBR	8.55255	8.5255	0.0382646	5.69979e+06			3	5	83.5785
O19	TH17-7	UNKNOWN	SYBR	11.2536	11.1239	0.183315	967466	1.05723e+06	126947	3	8	83.8471
P19	TH17-7	UNKNOWN	SYBR	10.9943	11.1239	0.183315	1.147e+06			3	8	83.8471
A20	TH19-1	UNKNOWN	SYBR	10.9632	10.9089	0.0767848	1.17066e+06	1.21392e+06	61176.5	3	7	82.1012
B20	TH19-1	UNKNOWN	SYBR	10.8546	10.9089	0.0767848	1.25718e+06			3	7	81.9669
C20	TH19-5	UNKNOWN	SYBR	12.7495	12.7049	0.0630274	362288	373206	15440.4	3	9	85.0558
D20	TH19-5	UNKNOWN	SYBR	12.6604	12.7049	0.0630274	384124			3	9	85.0558
E20	TH19-7	UNKNOWN	SYBR	7.99925	7.975	0.0342937	8.19671e+06	8.32932e+06	187539	3	5	85.3244
F20	TH19-7	UNKNOWN	SYBR	7.95075	7.975	0.0342937	8.46193e+06			3	5	85.3244
G20	TH21-1	UNKNOWN	SYBR	12.649	12.5652	0.118462	387004	409504	31820.2	3	9	83.9814
H20	TH21-1	UNKNOWN	SYBR	12.4815	12.5652	0.118462	432005			3	8	83.9814
I20	TH21-5	UNKNOWN	SYBR	10.4105	10.5236	0.159991	1.68286e+06	1.56669e+06	164281	3	6	84.1157
J20	TH21-5	UNKNOWN	SYBR	10.6368	10.5236	0.159991	1.45053e+06			3	7	84.1157
K20	TH21-7	UNKNOWN	SYBR	9.81856	9.76389	0.0773115	2.48224e+06	2.57462e+06	130640	3	6	83.7128	80.3552
L20	TH21-7	UNKNOWN	SYBR	9.70923	9.76389	0.0773115	2.66699e+06			3	6	83.4442	80.2209
M20	TH22-1	UNKNOWN	SYBR	9.29971	9.25402	0.0646169	3.48979e+06	3.59769e+06	152596	3	6	84.1157
N20	TH22-1	UNKNOWN	SYBR	9.20833	9.25402	0.0646169	3.70559e+06			3	6	84.1157
O20	TH22-5	UNKNOWN	SYBR	12.0583	12.0093	0.0693966	570365	589347	26845.1	3	8	85.0558
P20	TH22-5	UNKNOWN	SYBR	11.9602	12.0093	0.0693966	608329			3	8	84.9215
A21	TH22-7	UNKNOWN	SYBR	9.96669	10.0584	0.129649	2.25218e+06	2.12445e+06	180634	3	6	83.8471
B21	TH22-7	UNKNOWN	SYBR	10.15	10.0584	0.129649	1.99673e+06			3	6	83.9814
C21	TH24-1	UNKNOWN	SYBR	11.2281	11.3027	0.105592	983800	937858	64971.6	3	7	83.9814
D21	TH24-1	UNKNOWN	SYBR	11.3774	11.3027	0.105592	891917			3	8	84.1157
E21	TH24-5	UNKNOWN	SYBR	9.80006	9.71715	0.117257	2.51258e+06	2.65709e+06	204371	3	7	83.7128
F21	TH24-5	UNKNOWN	SYBR	9.63424	9.71715	0.117257	2.8016e+06			3	6	83.7128
G21	TH24-7	UNKNOWN	SYBR	9.13563	8.98132	0.218235	3.88677e+06	4.32333e+06	617398	3	6	83.7128
H21	TH24-7	UNKNOWN	SYBR	8.827	8.98132	0.218235	4.7599e+06			3	5	83.5785
I21	TH27-1	UNKNOWN	SYBR	9.00794	8.9653	0.0603078	4.2267e+06	4.34842e+06	172145	3	6	84.25
J21	TH27-1	UNKNOWN	SYBR	8.92265	8.9653	0.0603078	4.47015e+06			3	6	84.25
K21	TH27-5	UNKNOWN	SYBR	10.5186	10.4943	0.0344161	1.56751e+06	1.59297e+06	35994.7	3	7	83.9814
L21	TH27-5	UNKNOWN	SYBR	10.47	10.4943	0.0344161	1.61842e+06			3	7	83.7128
M21	TH27-7	UNKNOWN	SYBR	11.4022	11.3106	0.129517	877498	933569	79296.8	3	8	83.4442
N21	TH27-7	UNKNOWN	SYBR	11.2191	11.3106	0.129517	989640			3	8	83.4442
O21	TH31-1	UNKNOWN	SYBR	11.2415	11.2521	0.0150488	975181	968415	9568.78	3	7	83.3099
P21	TH31-1	UNKNOWN	SYBR	11.2628	11.2521	0.0150488	961649			3	7	83.4442
A22	TH31-5	UNKNOWN	SYBR	9.12575	9.1596	0.0478728	3.91207e+06	3.82703e+06	120277	3	6	83.4442
B22	TH31-5	UNKNOWN	SYBR	9.19345	9.1596	0.0478728	3.74198e+06			3	6	83.4442
C22	TH31-7	UNKNOWN	SYBR	10.7386	10.7037	0.0493813	1.35672e+06	1.38856e+06	45014.9	3	7	83.5785
D22	TH31-7	UNKNOWN	SYBR	10.6687	10.7037	0.0493813	1.42039e+06			3	7	83.5785
E22	TH32-1	UNKNOWN	SYBR	10.1834	10.2362	0.0747469	1.95349e+06	1.88799e+06	92623.9	3	6	83.9814
F22	TH32-1	UNKNOWN	SYBR	10.2891	10.2362	0.0747469	1.8225e+06			3	7	83.9814
G22	TH32-5	UNKNOWN	SYBR	9.64278	9.55178	0.128694	2.78592e+06	2.96274e+06	250056	3	6	83.4442
H22	TH32-5	UNKNOWN	SYBR	9.46078	9.55178	0.128694	3.13955e+06			3	6	83.3099
I22	TH32-7	UNKNOWN	SYBR	7.62036	7.73253	0.158626	1.05119e+07	9.79206e+06	1.01805e+06	3	6	83.3099
J22	TH32-7	UNKNOWN	SYBR	7.8447	7.73253	0.158626	9.07219e+06			3	6	83.1756
K22	TH34-1	UNKNOWN	SYBR	10.262	10.2621	0.000252881	1.85526e+06	1.85504e+06	308.338	3	7	83.8471
L22	TH34-1	UNKNOWN	SYBR	10.2623	10.2621	0.000252881	1.85483e+06			3	6	83.7128
M22	TH34-5	UNKNOWN	SYBR	13.6331	13.6581	0.0353818	202816	199539	4635.21	3	10	83.5785
N22	TH34-5	UNKNOWN	SYBR	13.6831	13.6581	0.0353818	196261			3	9	83.4442
O22	TH34-7	UNKNOWN	SYBR	14.7631	14.7503	0.0180995	96572	97390.5	1157.4	3	11	83.3099
P22	TH34-7	UNKNOWN	SYBR	14.7375	14.7503	0.0180995	98208.9			3	11	83.1756
A23	TH36-2	UNKNOWN	SYBR	11.2155	11.2802	0.0915443	991982	951562	57162.5	3	7	83.5785
B23	TH36-2	UNKNOWN	SYBR	11.3449	11.2802	0.0915443	911142			3	8	83.5785
C23	TH36-5	UNKNOWN	SYBR	9.79696	9.75087	0.0651745	2.5177e+06	2.59624e+06	111070	3	6	83.3099
D23	TH36-5	UNKNOWN	SYBR	9.70479	9.75087	0.0651745	2.67478e+06			3	6	83.3099
E23	TH36-7	UNKNOWN	SYBR	10.4605	10.4747	0.0201388	1.6285e+06	1.61342e+06	21333.6	3	6	83.3099
F23	TH36-7	UNKNOWN	SYBR	10.489	10.4747	0.0201388	1.59833e+06			3	7	83.4442
A12	B.Long 15707-1	STANDARD	SYBR	7.47659	7.49162	0.0212504	1.15526e+07	1.14398e+07	159616	3	5	84.25
B12	B.Long 15707-1	STANDARD	SYBR	7.50664	7.49162	0.0212504	1.13269e+07			3	5	84.25
C12	B.Long 15707-2	STANDARD	SYBR	11.1704	11.1864	0.0227054	1.02178e+06	1.01112e+06	15073.6	3	7	84.25
D12	B.Long 15707-2	STANDARD	SYBR	11.2025	11.1864	0.0227054	1.00046e+06			3	7	84.25
E12	B.Long 15707-3	STANDARD	SYBR	14.9934	14.9984	0.00716766	83022	82746.7	389.427	3	11	84.25
F12	B.Long 15707-3	STANDARD	SYBR	15.0035	14.9984	0.00716766	82471.3			3	11	84.25
G12	B.Long 15707-4	STANDARD	SYBR	19.6452	19.6452		3914.59	1957.53	2767.71	3	15	84.3843
M12	NTC	NTC	SYBR	33.4001			0.468091			3	29	80.2209	74.8489
N12	NTC	NTC	SYBR	29.8262			4.8918	2.53407	3.33434	3	26	74.7146	65.5821
O12	NTC	NTC	SYBR	34.8869			0.176334			3	31	75.1175	81.0267
P12	NTC	NTC	SYBR	33.6547			0.396016	0.396016	#DIV/0!	3	29	74.9832	65.8507

## Sheet: Universal_P2
Block Type	384-Well Block
Calibration Background is expired	Yes
Calibration Background performed on	2015-09-28 10:38:58 AM NZDT
Calibration FAM is expired	Yes
Calibration FAM performed on	2015-09-28 12:44:37 PM NZDT
Calibration NED is expired	Yes
Calibration NED performed on	2015-09-28 12:27:45 PM NZDT
Calibration ROI is expired	Yes
Calibration ROI performed on	2015-09-28 10:31:42 AM NZDT
Calibration ROX is expired	Yes
Calibration ROX performed on	2015-09-28 11:50:26 AM NZDT
Calibration SYBR is expired	Yes
Calibration SYBR performed on	2015-09-28 11:35:56 AM NZDT
Calibration TAMRA is expired	Yes
Calibration TAMRA performed on	2015-09-28 12:05:53 PM NZDT
Calibration Uniformity is expired	Yes
Calibration Uniformity performed on	2015-09-28 11:17:29 AM NZDT
Calibration VIC is expired	Yes
Calibration VIC performed on	2015-09-28 12:36:53 PM NZDT
Chemistry	SYBR_GREEN
Experiment File Name	E:\Taq sialidase - Kinase comparisons\06-Chin formula 384 p2 sybr.eds
Experiment Name	Chinese formula 384 plate 2
Experiment Run Start Time	2016-06-28 02:41:58 AM NZST
Experiment Run Stop Time	2016-06-28 03:51:21 AM NZST
Experiment Type	Standard Curve
Instrument Name	ViiA7
Instrument Serial Number	278880388
Instrument Type	ViiA(TM) 7 System
Passive Reference	ROX
Quantification Cycle Method	Ct
Signal Smoothing On	true
Stage/ Cycle where Analysis is performed	Stage 2, Step 2
Well Position	Sample Name	Task	Reporter	CT	Ct Mean	Ct SD	Quant by formula	Av. Q/formula	SD Q/formula	Baseline Start	Baseline End	Tm1	Tm2
A24	AB70	UNKNOWN	SYBR	15.5569	15.5049	0.0735398	57345.3	59371.6	2865.75	3	11	83.9607
B24	AB70	UNKNOWN	SYBR	15.4529	15.5049	0.0735398	61398			3	11	83.8265
C24	AB71	UNKNOWN	SYBR	14.1255	14.102	0.0332097	146786	149085	3250.59	3	10	83.6924
D24	AB71	UNKNOWN	SYBR	14.0785	14.102	0.0332097	151383			3	10	83.6924
E24	AB72	UNKNOWN	SYBR	6.26372	6.40454	0.199151	2.56179e+07	2.34553e+07	3.05839e+06	3	4	83.5582
F24	AB72	UNKNOWN	SYBR	6.54536	6.40454	0.199151	2.12927e+07			3	4	83.6924
G24	AB73	UNKNOWN	SYBR	6.78299	6.75526	0.0392212	1.82166e+07	1.85545e+07	477778	3	5	83.1556
H24	AB73	UNKNOWN	SYBR	6.72752	6.75526	0.0392212	1.88923e+07			3	4	83.2898
I24	AB74	UNKNOWN	SYBR	9.03314	9.04486	0.0165667	4.15733e+06	4.1256e+06	44876.8	3	6	84.2291
J24	AB74	UNKNOWN	SYBR	9.05657	9.04486	0.0165667	4.09387e+06			3	6	84.2291
K24	AB75	UNKNOWN	SYBR	6.74935	7.01882	0.381094	1.86235e+07	1.58483e+07	3.92482e+06	3	4	84.0949
L24	AB75	UNKNOWN	SYBR	7.28829	7.01882	0.381094	1.3073e+07			3	4	83.8265
M24	AB76	UNKNOWN	SYBR	10.9739	11.1166	0.201766	1.16245e+06	1.06315e+06	140436	3	7	85.571
N24	AB76	UNKNOWN	SYBR	11.2593	11.1166	0.201766	963842			3	7	85.571
O24	AB77	UNKNOWN	SYBR	9.16536	9.35404	0.266838	3.81163e+06	3.39336e+06	591519	3	6	83.5582
P24	AB77	UNKNOWN	SYBR	9.54273	9.35404	0.266838	2.9751e+06			3	6	83.424
I20	AF001A	UNKNOWN	SYBR	10.0234	11.374	1.90994	2.16983e+06	1.26906e+06	1.27388e+06	3	6	85.3027
J20	AF001A	UNKNOWN	SYBR	12.7245	11.374	1.90994	368290			3	9	85.1685
K20	AF001B	UNKNOWN	SYBR	9.60453	9.7433	0.196251	2.85679e+06	2.61883e+06	336529	3	6	85.3027
L20	AF001B	UNKNOWN	SYBR	9.88207	9.7433	0.196251	2.38087e+06			3	6	85.1685
M20	AF001C	UNKNOWN	SYBR	10.6111	10.6348	0.0334808	1.47515e+06	1.45257e+06	31930.3	3	7	85.0343
N20	AF001C	UNKNOWN	SYBR	10.6585	10.6348	0.0334808	1.42999e+06			3	7	85.1685
O20	AF001D	UNKNOWN	SYBR	10.7729	10.7445	0.0402681	1.32647e+06	1.35174e+06	35735.7	3	7	85.1685
P20	AF001D	UNKNOWN	SYBR	10.716	10.7445	0.0402681	1.37701e+06			3	7	85.0343
A21	AF003A	UNKNOWN	SYBR	13.4513	13.3122	0.196727	228521	251422	32386.8	3	9	82.8872
B21	AF003A	UNKNOWN	SYBR	13.1731	13.3122	0.196727	274323			3	9	82.8872
C21	AF003B	UNKNOWN	SYBR	11.8725	11.8451	0.0387994	644360	656180	16714.8	3	8	83.0214	84.0949
D21	AF003B	UNKNOWN	SYBR	11.8177	11.8451	0.0387994	667999			3	8	83.0214	83.8265
E21	AF003C	UNKNOWN	SYBR	10.8553	10.8278	0.0389342	1.25664e+06	1.27977e+06	32712.8	3	7	82.8872
F21	AF003C	UNKNOWN	SYBR	10.8002	10.8278	0.0389342	1.3029e+06			3	7	83.0214
G21	AF003D	UNKNOWN	SYBR	11.1246	10.9725	0.215106	1.05294e+06	1.16934e+06	164610	3	7	82.753	83.8265
H21	AF003D	UNKNOWN	SYBR	10.8204	10.9725	0.215106	1.28573e+06			3	7	82.8872	83.8265
A1	AF004A	UNKNOWN	SYBR	20.1196	20.1238	0.00591809	2866.86	2859.01	11.1091	3	16	83.5582
B1	AF004A	UNKNOWN	SYBR	20.1279	20.1238	0.00591809	2851.15			3	16	83.6924
C1	AF004B	UNKNOWN	SYBR	11.8695	11.8777	0.0116231	645647	642182	4900.79	3	8	85.0343
D1	AF004B	UNKNOWN	SYBR	11.8859	11.8777	0.0116231	638716			3	8	85.0343
E1	AF004C	UNKNOWN	SYBR	12.202	12.1976	0.00629168	519002	520523	2150.41	3	8	85.0343
F1	AF004C	UNKNOWN	SYBR	12.1931	12.1976	0.00629168	522044			3	8	85.0343
G1	AF004D	UNKNOWN	SYBR	12.2791	12.2297	0.069781	493407	509922	23355.7	3	8	85.3027
H1	AF004D	UNKNOWN	SYBR	12.1804	12.2297	0.069781	526437			3	8	85.1685
I1	AF005A	UNKNOWN	SYBR	12.8995	12.9895	0.127253	328304	310009	25872.7	3	9	83.0214
J1	AF005A	UNKNOWN	SYBR	13.0795	12.9895	0.127253	291714			3	9	83.0214
K1	AF005B	UNKNOWN	SYBR	10.7785	10.8323	0.0759736	1.3216e+06	1.27658e+06	63655.7	3	7	85.0343
L1	AF005B	UNKNOWN	SYBR	10.886	10.8323	0.0759736	1.23157e+06			3	7	84.7659
M1	AF005C	UNKNOWN	SYBR	10.8564	10.8999	0.200636	1.25571e+06	1.15638e+06	140471	3	7	85.0343
N1	AF005C	UNKNOWN	SYBR	11.1187	10.8999	0.200636	1.05705e+06			3	7	84.6317
O1	AF005D	UNKNOWN	SYBR	10.7246	10.8023	0.109912	1.36927e+06	1.30284e+06	93943.1	3	7	82.753
P1	AF005D	UNKNOWN	SYBR	10.88	10.8023	0.109912	1.23642e+06			3	7	82.4846
A2	AF009A	UNKNOWN	SYBR	12.8499	12.824	0.0365181	339185	345035	8272.38	3	9	83.6924
B2	AF009A	UNKNOWN	SYBR	12.7982	12.824	0.0365181	350884			3	9	83.8265
C2	AF009B	UNKNOWN	SYBR	13.1793	12.9704	0.295328	273215	316319	60957.1	3	9	83.1556
D2	AF009B	UNKNOWN	SYBR	12.7616	12.9704	0.295328	359422			3	8	83.6924
E2	AF009C	UNKNOWN	SYBR	12.5598	12.4494	0.156065	410354	442351	45249.7	3	9	83.6924
F2	AF009C	UNKNOWN	SYBR	12.3391	12.4494	0.156065	474347			3	8	83.9607
G2	AF009D	UNKNOWN	SYBR	11.4917	11.3722	0.169118	827406	897752	99485.5	3	8	83.8265
H2	AF009D	UNKNOWN	SYBR	11.2526	11.3722	0.169118	968099			3	7	84.0949
I21	AF010A	UNKNOWN	SYBR	10.7937	10.7943	0.000786292	1.30846e+06	1.30798e+06	675.3	3	7	82.082
J21	AF010A	UNKNOWN	SYBR	10.7949	10.7943	0.000786292	1.30751e+06			3	7	82.082
K21	AF010B	UNKNOWN	SYBR	11.9163	11.9547	0.0542926	626102	610711	21766.4	3	8	83.424
L21	AF010B	UNKNOWN	SYBR	11.9931	11.9547	0.0542926	595320			3	8	83.5582
M21	AF010C	UNKNOWN	SYBR	22.5173	22.5355	0.0256954	593.839	586.838	9.90058	3	18	83.5582
N21	AF010C	UNKNOWN	SYBR	22.5536	22.5355	0.0256954	579.838			3	18	83.6924
O21	AF010D	UNKNOWN	SYBR	10.407	10.3497	0.0810905	1.68674e+06	1.75269e+06	93276.9	3	7	83.424
P21	AF010D	UNKNOWN	SYBR	10.2923	10.3497	0.0810905	1.81865e+06			3	7	83.5582
A22	AF011A	UNKNOWN	SYBR	10.511	10.4732	0.0534253	1.57537e+06	1.61543e+06	56656.7	3	7	84.0949
B22	AF011A	UNKNOWN	SYBR	10.4355	10.4732	0.0534253	1.65549e+06			3	7	84.0949
C22	AF011B	UNKNOWN	SYBR	11.3842	11.3612	0.0325259	887952	901566	19253.2	3	7	84.2291
D22	AF011B	UNKNOWN	SYBR	11.3382	11.3612	0.0325259	915180			3	8	84.2291
E22	AF011C	UNKNOWN	SYBR	11.6896	11.7573	0.0957428	726582	695678	43705.3	3	8	84.0949
F22	AF011C	UNKNOWN	SYBR	11.825	11.7573	0.0957428	664774			3	8	84.0949
G22	AF011D	UNKNOWN	SYBR	10.3661	10.3563	0.0138012	1.73263e+06	1.7438e+06	15802.2	3	7	84.2291
H22	AF011D	UNKNOWN	SYBR	10.3466	10.3563	0.0138012	1.75498e+06			3	7	84.3633
I2	AF012A	UNKNOWN	SYBR	11.6907	11.6926	0.00273179	726089	725169	1300.8	3	8	83.8265
J2	AF012A	UNKNOWN	SYBR	11.6945	11.6926	0.00273179	724250			3	8	83.8265
K2	AF012B	UNKNOWN	SYBR	10.0591	10.0191	0.0566123	2.11958e+06	2.17678e+06	80896.8	3	6	83.9607
L2	AF012B	UNKNOWN	SYBR	9.97904	10.0191	0.0566123	2.23399e+06			3	6	83.8265
M2	AF012C	UNKNOWN	SYBR	11.3657	11.3201	0.0645798	898769	926542	39276.8	3	8	83.8265
N2	AF012C	UNKNOWN	SYBR	11.2744	11.3201	0.0645798	954315			3	7	83.5582
O2	AF012D	UNKNOWN	SYBR	13.1367	13.0623	0.105224	280959	295378	20391.8	3	9	84.0949
P2	AF012D	UNKNOWN	SYBR	12.9879	13.0623	0.105224	309797			3	9	84.3633
A3	AF014A	UNKNOWN	SYBR	11.9397	11.9404	0.0011174	616585	616266	452.222	3	8	83.2898
B3	AF014A	UNKNOWN	SYBR	11.9412	11.9404	0.0011174	615946			3	8	83.2898
C3	AF014B	UNKNOWN	SYBR	10.9101	10.9086	0.00209318	1.21221e+06	1.21339e+06	1667.84	3	7	83.424
D3	AF014B	UNKNOWN	SYBR	10.9071	10.9086	0.00209318	1.21457e+06			3	7	83.2898
E3	AF014C	UNKNOWN	SYBR	11.3656	11.3934	0.0393119	898867	882757	22783.4	3	8	83.424
F3	AF014C	UNKNOWN	SYBR	11.4212	11.3934	0.0393119	866646			3	8	83.424
G3	AF014D	UNKNOWN	SYBR	11.7724	11.6989	0.103938	688155	723019	49305.3	3	8	83.424
H3	AF014D	UNKNOWN	SYBR	11.6254	11.6989	0.103938	757883			3	7	83.424
I22	AF016A	UNKNOWN	SYBR	12.2324	12.2662	0.0476731	508746	497731	15577.7	3	8	83.1556
J22	AF016A	UNKNOWN	SYBR	12.2999	12.2662	0.0476731	486716			3	8	83.1556
K22	AF016B	UNKNOWN	SYBR	12.9744	12.97	0.00625122	312555	313465	1286.7	3	9	83.1556
L22	AF016B	UNKNOWN	SYBR	12.9656	12.97	0.00625122	314374			3	9	83.1556
M22	AF016C	UNKNOWN	SYBR	12.7206	12.6528	0.0958305	369234	386416	24298.4	3	9	82.8872
N22	AF016C	UNKNOWN	SYBR	12.5851	12.6528	0.0958305	403597			3	8	83.0214
O22	AF016D	UNKNOWN	SYBR	10.7701	10.6026	0.236905	1.32894e+06	1.49244e+06	231222	3	7	83.0214
P22	AF016D	UNKNOWN	SYBR	10.4351	10.6026	0.236905	1.65594e+06			3	6	83.1556
I3	AF018A	UNKNOWN	SYBR	11.7022	11.6237	0.111054	720627	759767	55352.2	3	8	84.4975
J3	AF018A	UNKNOWN	SYBR	11.5451	11.6237	0.111054	798907			3	7	84.4975
K3	AF018B	UNKNOWN	SYBR	9.49763	9.48823	0.0132975	3.0645e+06	3.08354e+06	26922.7	3	6	84.6317
L3	AF018B	UNKNOWN	SYBR	9.47883	9.48823	0.0132975	3.10258e+06			3	6	84.4975
M3	AF018C	UNKNOWN	SYBR	11.5409	11.5735	0.0461855	801148	784332	23781.7	3	8	84.4975
N3	AF018C	UNKNOWN	SYBR	11.6062	11.5735	0.0461855	767516			3	8	84.3633
O3	AF018D	UNKNOWN	SYBR	11.3082	11.3262	0.0254196	922430	917019	7652.63	3	7	84.0949
P3	AF018D	UNKNOWN	SYBR	11.3441	11.3262	0.0254196	911607			3	8	84.0949
A4	AF023A	UNKNOWN	SYBR	20.0797	19.9909	0.125506	2942.93	3124.81	257.217	3	16	82.8872
B4	AF023A	UNKNOWN	SYBR	19.9022	19.9909	0.125506	3306.69			3	15	83.0214
C4	AF023B	UNKNOWN	SYBR	11.9201	11.8719	0.0682159	624545	644965	28878.7	3	8	82.6188
D4	AF023B	UNKNOWN	SYBR	11.8236	11.8719	0.0682159	665386			3	8	82.753
E4	AF023C	UNKNOWN	SYBR	12.5592	12.5509	0.0117768	410507	412764	3191.77	3	8	82.6188
F4	AF023C	UNKNOWN	SYBR	12.5426	12.5509	0.0117768	415021			3	9	82.753
G4	AF023D	UNKNOWN	SYBR	14.0052	13.9773	0.0394811	158849	161815	4194.36	3	10	82.753
H4	AF023D	UNKNOWN	SYBR	13.9494	13.9773	0.0394811	164781			3	10	82.8872
A23	AF024A	UNKNOWN	SYBR	11.3534	11.3407	0.0179229	906097	913700	10752.3	3	7	82.6188
B23	AF024A	UNKNOWN	SYBR	11.328	11.3407	0.0179229	921304			3	8	82.753
C23	AF024B	UNKNOWN	SYBR	10.876	10.9107	0.0490414	1.23964e+06	1.21204e+06	39022.1	3	7	83.0214
D23	AF024B	UNKNOWN	SYBR	10.9454	10.9107	0.0490414	1.18445e+06			3	7	83.0214
E23	AF024C	UNKNOWN	SYBR	9.67555	9.63131	0.0625655	2.72662e+06	2.80817e+06	115329	3	6	83.1556
F23	AF024C	UNKNOWN	SYBR	9.58707	9.63131	0.0625655	2.88972e+06			3	6	83.2898
G23	AF024D	UNKNOWN	SYBR	10.7024	10.8511	0.210265	1.38936e+06	1.26614e+06	174252	3	7	83.2898
H23	AF024D	UNKNOWN	SYBR	10.9997	10.8511	0.210265	1.14293e+06			3	7	83.2898
I23	AF025A	UNKNOWN	SYBR	10.1665	10.2639	0.137744	1.97528e+06	1.8567e+06	167698	3	6	83.1556
J23	AF025A	UNKNOWN	SYBR	10.3613	10.2639	0.137744	1.73812e+06			3	7	82.6188
K23	AF025B	UNKNOWN	SYBR	9.88449	9.96497	0.113807	2.37707e+06	2.25788e+06	168567	3	6	84.0949
L23	AF025B	UNKNOWN	SYBR	10.0454	9.96497	0.113807	2.13868e+06			3	7	83.9607
M23	AF025C	UNKNOWN	SYBR	10.646	10.8231	0.250424	1.44174e+06	1.29217e+06	211520	3	7	82.6188
N23	AF025C	UNKNOWN	SYBR	11.0002	10.8231	0.250424	1.14261e+06			3	7	82.6188
O23	AF025D	UNKNOWN	SYBR	11.0169	10.9839	0.0467149	1.13013e+06	1.15518e+06	35427.6	3	7	83.9607
P23	AF025D	UNKNOWN	SYBR	10.9508	10.9839	0.0467149	1.18023e+06			3	7	83.8265
I4	AF029A	UNKNOWN	SYBR	10.5871	10.4929	0.133148	1.49863e+06	1.59725e+06	139463	3	7	82.753
J4	AF029A	UNKNOWN	SYBR	10.3988	10.4929	0.133148	1.69586e+06			3	7	82.8872
K4	AF029B	UNKNOWN	SYBR	10.7049	10.6439	0.0863289	1.38706e+06	1.44495e+06	81861.9	3	7	82.753
L4	AF029B	UNKNOWN	SYBR	10.5828	10.6439	0.0863289	1.50283e+06			3	7	82.8872
M4	AF029C	UNKNOWN	SYBR	10.9121	10.8651	0.0664019	1.21065e+06	1.24915e+06	54445.1	3	7	82.753
N4	AF029C	UNKNOWN	SYBR	10.8182	10.8651	0.0664019	1.28764e+06			3	7	82.753
O4	AF029D	UNKNOWN	SYBR	13.1782	13.135	0.0610954	273412	281391	11285.2	3	9	82.4846
P4	AF029D	UNKNOWN	SYBR	13.0918	13.135	0.0610954	289371			3	9	82.753
A5	AF030A	UNKNOWN	SYBR	10.1891	10.246	0.0803939	1.94615e+06	1.87615e+06	98990.8	3	6	83.1556
B5	AF030A	UNKNOWN	SYBR	10.3028	10.246	0.0803939	1.80615e+06			3	6	83.0214
C5	AF030B	UNKNOWN	SYBR	15.5925	15.5403	0.0738494	56020.1	58008.3	2811.69	3	11	82.6188
D5	AF030B	UNKNOWN	SYBR	15.4881	15.5403	0.0738494	59996.5			3	11	82.753
E5	AF030C	UNKNOWN	SYBR	12.4948	12.5411	0.0654497	428243	415618	17855.6	3	9	85.9736
F5	AF030C	UNKNOWN	SYBR	12.5873	12.5411	0.0654497	402992			3	9	85.9736
G5	AF030D	UNKNOWN	SYBR	11.1855	11.2088	0.0330182	1.0117e+06	996428	21600.9	3	7	86.1078
H5	AF030D	UNKNOWN	SYBR	11.2322	11.2088	0.0330182	981153			3	7	85.8394
I5	AF033A	UNKNOWN	SYBR	10.9696	11.0343	0.0915895	1.16581e+06	1.11828e+06	67211	3	7	83.9607
J5	AF033A	UNKNOWN	SYBR	11.0991	11.0343	0.0915895	1.07076e+06			3	7	83.9607
K5	AF033B	UNKNOWN	SYBR	9.97798	10.0773	0.140501	2.23555e+06	2.09883e+06	193350	3	6	86.3762
L5	AF033B	UNKNOWN	SYBR	10.1767	10.0773	0.140501	1.96211e+06			3	6	86.1078
M5	AF033C	UNKNOWN	SYBR	10.894	10.9883	0.133371	1.22508e+06	1.15373e+06	100906	3	7	83.8265
N5	AF033C	UNKNOWN	SYBR	11.0826	10.9883	0.133371	1.08238e+06			3	7	83.6924
O5	AF033D	UNKNOWN	SYBR	10.4399	10.4587	0.0265148	1.65067e+06	1.6306e+06	28387.2	3	7	85.9736
P5	AF033D	UNKNOWN	SYBR	10.4774	10.4587	0.0265148	1.61053e+06			3	7	85.9736
A6	AF038A	UNKNOWN	SYBR	10.9206	10.8987	0.0310383	1.20387e+06	1.22148e+06	24892	3	7	83.0214
B6	AF038A	UNKNOWN	SYBR	10.8767	10.8987	0.0310383	1.23908e+06			3	7	83.0214
C6	AF038B	UNKNOWN	SYBR	10.5943	10.5903	0.00568072	1.49154e+06	1.49548e+06	5577.6	3	7	83.2898
D6	AF038B	UNKNOWN	SYBR	10.5863	10.5903	0.00568072	1.49943e+06			3	7	83.1556
E6	AF038C	UNKNOWN	SYBR	10.552	10.5894	0.052871	1.53354e+06	1.49681e+06	51951.9	3	7	82.082	82.8872
F6	AF038C	UNKNOWN	SYBR	10.6268	10.5894	0.052871	1.46007e+06			3	7	82.082	82.8872
G6	AF038D	UNKNOWN	SYBR	10.3449	10.5303	0.26213	1.75692e+06	1.56713e+06	268405	3	7	84.2291
H6	AF038D	UNKNOWN	SYBR	10.7156	10.5303	0.26213	1.37734e+06			3	7	84.2291
I6	AF044A	UNKNOWN	SYBR	11.886	11.9033	0.0244721	638697	631521	10147.2	3	8	85.3027
J6	AF044A	UNKNOWN	SYBR	11.9206	11.9033	0.0244721	624346			3	8	85.1685
K6	AF044B	UNKNOWN	SYBR	10.712	10.7356	0.0333749	1.38058e+06	1.35951e+06	29790	3	7	85.1685
L6	AF044B	UNKNOWN	SYBR	10.7592	10.7356	0.0333749	1.33845e+06			3	7	85.0343
M6	AF044C	UNKNOWN	SYBR	10.0138	10.0731	0.0839275	2.18362e+06	2.10176e+06	115763	3	6	85.1685	85.1685
N6	AF044C	UNKNOWN	SYBR	10.1325	10.0731	0.0839275	2.0199e+06			3	6	85.0343	85.1685
O6	AF044D	UNKNOWN	SYBR	11.4724	11.5379	0.0925916	837970	803451	48816.6	3	8	85.0343
P6	AF044D	UNKNOWN	SYBR	11.6034	11.5379	0.0925916	768933			3	8	84.9001
A7	AF046A	UNKNOWN	SYBR	12.3865	12.4586	0.101973	459794	439024	29373.4	3	9	83.0214
B7	AF046A	UNKNOWN	SYBR	12.5307	12.4586	0.101973	418254			3	9	83.1556
C7	AF046B	UNKNOWN	SYBR	10.0931	10.4046	0.440469	2.07278e+06	1.72487e+06	492018	3	7	82.8872
D7	AF046B	UNKNOWN	SYBR	10.716	10.4046	0.440469	1.37696e+06			3	7	83.0214
E7	AF046C	UNKNOWN	SYBR	9.20826	10.2851	1.52289	3.70577e+06	2.30339e+06	1.98326e+06	3	7	83.1556
F7	AF046C	UNKNOWN	SYBR	11.3619	10.2851	1.52289	901015			3	7	83.1556
G7	AF046D	UNKNOWN	SYBR	18.5584	18.4641	0.13334	7991.03	8517.67	744.79	3	14	83.424
H7	AF046D	UNKNOWN	SYBR	18.3698	18.4641	0.13334	9044.32			3	15	83.2898
I7	AF047A	UNKNOWN	SYBR	9.94816	9.98012	0.0451949	2.27975e+06	2.2329e+06	66251.9	3	6	84.2291
J7	AF047A	UNKNOWN	SYBR	10.0121	9.98012	0.0451949	2.18606e+06			3	6	84.2291
K7	AF047B	UNKNOWN	SYBR	9.60587	9.65743	0.0729147	2.85426e+06	2.76083e+06	132128	3	6	84.2291
L7	AF047B	UNKNOWN	SYBR	9.70899	9.65743	0.0729147	2.66741e+06			3	6	84.0949
M7	AF047C	UNKNOWN	SYBR	10.0081	10.0659	0.0817703	2.19183e+06	2.1117e+06	113324	3	6	84.2291
N7	AF047C	UNKNOWN	SYBR	10.1237	10.0659	0.0817703	2.03157e+06			3	7	84.0949
O7	AF047D	UNKNOWN	SYBR	10.8899	10.8943	0.00627685	1.2284e+06	1.22483e+06	5048.14	3	7	82.8872
P7	AF047D	UNKNOWN	SYBR	10.8988	10.8943	0.00627685	1.22126e+06			3	7	82.8872
A8	AF049A	UNKNOWN	SYBR	10.8512	10.8929	0.0589098	1.25998e+06	1.22644e+06	47427.6	3	7	84.9001
B8	AF049A	UNKNOWN	SYBR	10.9346	10.8929	0.0589098	1.19291e+06			3	7	84.9001
C8	AF049B	UNKNOWN	SYBR	10.8862	10.8542	0.0452381	1.23143e+06	1.25784e+06	37356.7	3	7	85.1685
D8	AF049B	UNKNOWN	SYBR	10.8222	10.8542	0.0452381	1.28426e+06			3	7	85.0343
E8	AF049C	UNKNOWN	SYBR	10.1447	10.1573	0.0178372	2.00376e+06	1.9873e+06	23274.2	3	7	85.0343
F8	AF049C	UNKNOWN	SYBR	10.1699	10.1573	0.0178372	1.97084e+06			3	6	85.0343
G8	AF049D	UNKNOWN	SYBR	10.5501	10.4047	0.205625	1.53542e+06	1.69694e+06	228418	3	7	85.0343
H8	AF049D	UNKNOWN	SYBR	10.2593	10.4047	0.205625	1.85845e+06			3	7	85.1685
I8	AF050A	UNKNOWN	SYBR	19.7844	19.8143	0.0422925	3572.57	3503.77	97.2861	3	15	83.2898
J8	AF050A	UNKNOWN	SYBR	19.8442	19.8143	0.0422925	3434.98			3	15	83.1556
K8	AF050B	UNKNOWN	SYBR	16.0979	15.9326	0.23379	40199	45072.3	6891.93	3	12	83.2898
L8	AF050B	UNKNOWN	SYBR	15.7673	15.9326	0.23379	49945.6			3	12	83.2898
M8	AF050C	UNKNOWN	SYBR	16.8602	16.8602	0	24370	55582.1	44140.6	3	12	83.424
N8	AF050C	UNKNOWN	SYBR	14.9257	15.8929	1.36788	86794.2			3	12	83.5582
O8	AF050D	UNKNOWN	SYBR	16.7535	16.1144	0.903781	26138.4	43319.1	24297.1	3	12	85.1685
P8	AF050D	UNKNOWN	SYBR	15.4753	16.1144	0.903781	60499.8			3	12	85.0343
A9	AF053A	UNKNOWN	SYBR	14.231	13.6809	0.777851	136962	209495	102576	3	10	84.9001
B9	AF053A	UNKNOWN	SYBR	13.1309	13.6809	0.777851	282027			3	10	85.1685
C9	AF053B	UNKNOWN	SYBR	9.69593	9.78047	0.119552	2.69037e+06	2.54903e+06	199890	3	6	85.1685
D9	AF053B	UNKNOWN	SYBR	9.86501	9.78047	0.119552	2.40769e+06			3	6	85.3027
E9	AF053C	UNKNOWN	SYBR	10.4754	10.0693	0.574224	1.61269e+06	2.18068e+06	803259	3	6	83.9607
F9	AF053C	UNKNOWN	SYBR	9.66329	10.0693	0.574224	2.74867e+06			3	6	84.2291
G9	AF053D	UNKNOWN	SYBR	11.5573	11.5397	0.0249988	792527	801833	13161.1	3	7	84.0949	82.8872
H9	AF053D	UNKNOWN	SYBR	11.522	11.5397	0.0249988	811139			3	8	84.3633	82.8872
I9	AF055A	UNKNOWN	SYBR	10.8053	10.7392	0.0934176	1.29857e+06	1.3574e+06	83209.3	3	7	83.2898
J9	AF055A	UNKNOWN	SYBR	10.6732	10.7392	0.0934176	1.41624e+06			3	7	83.424
K9	AF055B	UNKNOWN	SYBR	12.838	12.8635	0.0360487	341835	336208	7957.14	3	9	83.2898
L9	AF055B	UNKNOWN	SYBR	12.889	12.8635	0.0360487	330581			3	9	83.424
M9	AF055C	UNKNOWN	SYBR	13.1072	13.0204	0.122746	286461	303753	24454.7	3	9	83.1556
N9	AF055C	UNKNOWN	SYBR	12.9336	13.0204	0.122746	321045			3	8	83.2898
O9	AF055D	UNKNOWN	SYBR	10.9569	11.019	0.0877652	1.17551e+06	1.12951e+06	65054.5	3	7	83.5582
P9	AF055D	UNKNOWN	SYBR	11.0811	11.019	0.0877652	1.08351e+06			3	7	83.5582
A10	AF057A	UNKNOWN	SYBR	19.2049	19.3532	0.209719	5226.69	4764.25	653.984	3	15	83.1556
B10	AF057A	UNKNOWN	SYBR	19.5015	19.3532	0.209719	4301.82			3	15	83.1556
C10	AF057B	UNKNOWN	SYBR	10.4417	10.3763	0.0924304	1.64873e+06	1.72261e+06	104481	3	7	83.0214
D10	AF057B	UNKNOWN	SYBR	10.311	10.3763	0.0924304	1.79649e+06			3	6	82.8872
E10	AF057C	UNKNOWN	SYBR	10.7568	10.8839	0.17978	1.34057e+06	1.23751e+06	145743	3	7	82.8872
F10	AF057C	UNKNOWN	SYBR	11.0111	10.8839	0.17978	1.13445e+06			3	7	82.8872
G10	AF057D	UNKNOWN	SYBR	9.84126	9.84318	0.00271628	2.44551e+06	2.44243e+06	4355.69	3	6	83.1556
H10	AF057D	UNKNOWN	SYBR	9.8451	9.84318	0.00271628	2.43936e+06			3	6	82.8872
I10	AF058A	UNKNOWN	SYBR	11.4083	11.4567	0.068371	873988	847106	38016.1	3	7	82.4846
J10	AF058A	UNKNOWN	SYBR	11.505	11.4567	0.068371	820225			3	8	82.8872
K10	AF058B	UNKNOWN	SYBR	11.7976	11.7002	0.137664	676880	723031	65266.9	3	8	83.2898
L10	AF058B	UNKNOWN	SYBR	11.6029	11.7002	0.137664	769182			3	7	83.1556
M10	AF058C	UNKNOWN	SYBR	11.3292	11.3889	0.0845095	920610	885869	49131	3	7	83.424
N10	AF058C	UNKNOWN	SYBR	11.4487	11.3889	0.0845095	851129			3	7	83.5582
O10	AF058D	UNKNOWN	SYBR	12.0792	12.1357	0.0797924	562585	542497	28409.4	3	8	83.424
P10	AF058D	UNKNOWN	SYBR	12.1921	12.1357	0.0797924	522408			3	8	83.2898
A11	AF062A	UNKNOWN	SYBR	13.9911	14.0625	0.101022	160330	153151	10151.4	3	9	84.9001
B11	AF062A	UNKNOWN	SYBR	14.1339	14.0625	0.101022	145973			3	10	84.9001
C11	AF062B	UNKNOWN	SYBR	10.333	10.3221	0.0153752	1.77076e+06	1.78349e+06	18004.5	3	7	83.424
D11	AF062B	UNKNOWN	SYBR	10.3112	10.3221	0.0153752	1.79622e+06			3	7	83.2898
E11	AF062C	UNKNOWN	SYBR	10.2282	10.2815	0.0753923	1.8968e+06	1.83268e+06	90686.1	3	7	85.0343
F11	AF062C	UNKNOWN	SYBR	10.3349	10.2815	0.0753923	1.76855e+06			3	7	85.0343
G11	AF062D	UNKNOWN	SYBR	9.22001	9.84395	0.882387	3.67729e+06	2.64896e+06	1.45429e+06	3	7	85.0343
H11	AF062D	UNKNOWN	SYBR	10.4679	10.4679	0	1.62062e+06			3	7	85.3027
I11	AF063A	UNKNOWN	SYBR	10.348	10.4876	0.19742	1.75336e+06	1.60652e+06	207667	3	7	83.8265
J11	AF063A	UNKNOWN	SYBR	10.6272	10.4876	0.19742	1.45968e+06			3	6	83.6924
K11	AF063B	UNKNOWN	SYBR	10.205	10.4701	0.375033	1.92601e+06	1.64281e+06	400500	3	7	83.8265
L11	AF063B	UNKNOWN	SYBR	10.7353	10.4701	0.375033	1.35961e+06			3	7	83.5582
M11	AF063C	UNKNOWN	SYBR	12.5292	12.4898	0.0557984	418664	429796	15743.1	3	9	84.2291
N11	AF063C	UNKNOWN	SYBR	12.4503	12.4898	0.0557984	440928			3	8	84.0949
O11	AF063D	UNKNOWN	SYBR	10.6677	10.5976	0.0991962	1.42133e+06	1.4899e+06	96972.5	3	7	83.9607
P11	AF063D	UNKNOWN	SYBR	10.5274	10.5976	0.0991962	1.55847e+06			3	7	84.0949
A13	AF065A	UNKNOWN	SYBR	19.668	19.6734	0.00770647	3856.35	3842.6	19.4446	3	15	83.2898
B13	AF065A	UNKNOWN	SYBR	19.6789	19.6734	0.00770647	3828.85			3	15	83.5582
C13	AF065B	UNKNOWN	SYBR	12.523	12.3372	0.262757	420377	478459	82140.4	3	8	83.2898
D13	AF065B	UNKNOWN	SYBR	12.1514	12.3372	0.262757	536541			3	8	83.5582
E13	AF065C	UNKNOWN	SYBR	10.9219	10.8728	0.0693818	1.20287e+06	1.24289e+06	56602.3	3	7	83.9607
F13	AF065C	UNKNOWN	SYBR	10.8238	10.8728	0.0693818	1.28291e+06			3	7	84.2291
G13	AF065D	UNKNOWN	SYBR	10.888	10.9315	0.0615452	1.22997e+06	1.19581e+06	48310.7	3	7	84.2291
H13	AF065D	UNKNOWN	SYBR	10.975	10.9315	0.0615452	1.16165e+06			3	7	84.3633
I13	AF067A	UNKNOWN	SYBR	12.4996	12.4384	0.0864907	426891	444740	25243.3	3	9	83.1556
J13	AF067A	UNKNOWN	SYBR	12.3773	12.4384	0.0864907	462590			3	8	83.1556
K13	AF067B	UNKNOWN	SYBR	12.5397	12.36	0.254255	415786	471148	78292.5	3	8	83.1556
L13	AF067B	UNKNOWN	SYBR	12.1802	12.36	0.254255	526509			3	9	83.2898
M13	AF067C	UNKNOWN	SYBR	12.3214	12.2441	0.109312	479874	505508	36251.8	3	9	83.424
N13	AF067C	UNKNOWN	SYBR	12.1668	12.2441	0.109312	531142			3	9	83.5582
O13	AF067D	UNKNOWN	SYBR	11.8714	11.9963	0.176604	644847	596080	68966.6	3	8	83.1556
P13	AF067D	UNKNOWN	SYBR	12.1212	11.9963	0.176604	547314			3	8	82.8872
A14	AF068A	UNKNOWN	SYBR	12.2174	11.9123	0.431384	513806	640377	178999	3	8	84.6317
B14	AF068A	UNKNOWN	SYBR	11.6073	11.9123	0.431384	766949			3	8	83.2898
C14	AF068B	UNKNOWN	SYBR	12.117	11.9098	0.29312	548792	634632	121395	3	8	84.4975
D14	AF068B	UNKNOWN	SYBR	11.7025	11.9098	0.29312	720471			3	8	83.0214
E14	AF068C	UNKNOWN	SYBR	13.1128	12.6596	0.641034	285396	401479	164166	3	9	84.0949
F14	AF068C	UNKNOWN	SYBR	12.2063	12.6596	0.641034	517562			3	9	82.8872
G14	AF068D	UNKNOWN	SYBR	10.3888	14.837	6.29062	1.70695e+06	855956	1.20349e+06	3	7	84.3633
H14	AF068D	UNKNOWN	SYBR	19.2851	19.2851	0	4958.58			3	14	82.753
I14	AF070A	UNKNOWN	SYBR	11.8513	12.1212	0.381567	653394	555925	137842	3	8	85.1685
J14	AF070A	UNKNOWN	SYBR	12.391	12.1212	0.381567	458456			3	8	83.1556
K14	AF070B	UNKNOWN	SYBR	11.4848	11.2242	0.368571	831189	1.0008e+06	239862	3	8	84.2291
L14	AF070B	UNKNOWN	SYBR	10.9636	11.2242	0.368571	1.17041e+06			3	8	83.1556
M14	AF070C	UNKNOWN	SYBR	11.8956	12.455	0.791049	634668	469565	233490	3	9	84.0949
N14	AF070C	UNKNOWN	SYBR	13.0143	12.455	0.791049	304463			3	9	83.1556
O14	AF070D	UNKNOWN	SYBR	9.83842	10.2165	0.534662	2.45008e+06	1.97069e+06	677965	3	7	85.571
P14	AF070D	UNKNOWN	SYBR	10.5945	10.2165	0.534662	1.4913e+06			3	7	83.0214
A15	AF075A	UNKNOWN	SYBR	11.4936	11.5802	0.122546	826417	781973	62853.3	3	8	83.0214
B15	AF075A	UNKNOWN	SYBR	11.6669	11.5802	0.122546	737529			3	8	83.0214
C15	AF075B	UNKNOWN	SYBR	11.6489	11.6911	0.0597588	746296	726154	28485.6	3	8	83.1556
D15	AF075B	UNKNOWN	SYBR	11.7334	11.6911	0.0597588	706011			3	8	83.1556
E15	AF075C	UNKNOWN	SYBR	13.7141	13.6869	0.038475	192305	195803	4946.03	3	10	82.8872
F15	AF075C	UNKNOWN	SYBR	13.6597	13.6869	0.038475	199300			3	10	83.0214
G15	AF075D	UNKNOWN	SYBR	10.8998	11.3606	0.651562	1.22042e+06	943422	391737	3	7	83.1556
H15	AF075D	UNKNOWN	SYBR	11.8213	11.3606	0.651562	666422			3	8	83.2898
I15	AF078A	UNKNOWN	SYBR	10.7839	10.8669	0.117353	1.31693e+06	1.24895e+06	96142.3	3	7	83.6924
J15	AF078A	UNKNOWN	SYBR	10.9499	10.8669	0.117353	1.18097e+06			3	7	83.9607
K15	AF078B	UNKNOWN	SYBR	11.4167	11.4972	0.113793	869190	825611	61630.1	3	7	82.6188
L15	AF078B	UNKNOWN	SYBR	11.5776	11.4972	0.113793	782032			3	8	82.753
M15	AF078C	UNKNOWN	SYBR	10.875	10.915	0.0565206	1.24048e+06	1.20876e+06	44849	3	8	82.753
N15	AF078C	UNKNOWN	SYBR	10.9549	10.915	0.0565206	1.17705e+06			3	7	82.753
O15	AF078D	UNKNOWN	SYBR	9.25702	9.186	0.100441	3.589e+06	3.76443e+06	248085	3	6	83.6924
P15	AF078D	UNKNOWN	SYBR	9.11497	9.186	0.100441	3.93985e+06			3	6	83.8265
A16	AF084A	UNKNOWN	SYBR	11.7215	11.7021	0.027475	711551	720745	13001.5	3	8	83.0214
B16	AF084A	UNKNOWN	SYBR	11.6826	11.7021	0.027475	729938			3	8	83.1556
C16	AF084B	UNKNOWN	SYBR	13.4625	13.4519	0.0150164	226851	228444	2252.35	3	10	83.2898
D16	AF084B	UNKNOWN	SYBR	13.4413	13.4519	0.0150164	230037			3	9	83.0214
E16	AF084C	UNKNOWN	SYBR	13.1399	13.195	0.0779953	280371	270577	13850.8	3	9	82.4846
F16	AF084C	UNKNOWN	SYBR	13.2502	13.195	0.0779953	260783			3	9	82.3504
G16	AF084D	UNKNOWN	SYBR	10.7536	10.7209	0.0463359	1.34339e+06	1.37292e+06	41763.9	3	7	85.1685
H16	AF084D	UNKNOWN	SYBR	10.6881	10.7209	0.0463359	1.40245e+06			3	7	85.571
I16	AF085A	UNKNOWN	SYBR	12.8233	12.9109	0.123894	345152	326397	26523.1	3	8	82.8872
J16	AF085A	UNKNOWN	SYBR	12.9985	12.9109	0.123894	307643			3	9	82.8872
K16	AF085B	UNKNOWN	SYBR	13.6443	13.857	0.300789	201326	176796	34691.9	3	10	85.7052
L16	AF085B	UNKNOWN	SYBR	14.0697	13.857	0.300789	152265			3	10	85.8394
M16	AF085C	UNKNOWN	SYBR	18.2568	18.2939	0.0524657	9740.52	9508.93	327.512	3	14	85.9736
N16	AF085C	UNKNOWN	SYBR	18.331	18.2939	0.0524657	9277.35			3	14	85.9736
O16	AF085D	UNKNOWN	SYBR	12.3582	12.1391	0.309785	468427	546492	110400	3	8	84.9001
P16	AF085D	UNKNOWN	SYBR	11.9201	12.1391	0.309785	624556			3	8	85.1685
A17	AF087A	UNKNOWN	SYBR	12.0014	12.0846	0.117669	592083	561441	43334.7	3	8	85.1685
B17	AF087A	UNKNOWN	SYBR	12.1678	12.0846	0.117669	530798			3	8	85.3027
C17	AF087B	UNKNOWN	SYBR	9.8263	9.89439	0.0963039	2.46966e+06	2.36403e+06	149387	3	6	85.0343
D17	AF087B	UNKNOWN	SYBR	9.96249	9.89439	0.0963039	2.2584e+06			3	6	85.1685
E17	AF087C	UNKNOWN	SYBR	9.81931	10.3796	0.79244	2.48102e+06	1.83484e+06	913840	3	7	85.1685
F17	AF087C	UNKNOWN	SYBR	10.94	10.3796	0.79244	1.18866e+06			3	7	85.3027
G17	AF087D	UNKNOWN	SYBR	10.5921	10.6285	0.0514886	1.49371e+06	1.45884e+06	49310.6	3	7	85.1685
H17	AF087D	UNKNOWN	SYBR	10.6649	10.6285	0.0514886	1.42397e+06			3	7	85.1685
I17	AF090A	UNKNOWN	SYBR	11.8174	11.7401	0.10923	668131	703793	50433.4	3	7	83.6924
J17	AF090A	UNKNOWN	SYBR	11.6629	11.7401	0.10923	739455			3	7	83.6924
K17	AF090B	UNKNOWN	SYBR	10.9709	11.1284	0.222695	1.16477e+06	1.05597e+06	153859	3	7	83.1556	82.753
L17	AF090B	UNKNOWN	SYBR	11.2858	11.1284	0.222695	947178			3	8	83.1556	82.753
M17	AF090C	UNKNOWN	SYBR	9.95763	9.96444	0.00962567	2.26562e+06	2.25554e+06	14255.8	3	6	83.1556	83.0214
N17	AF090C	UNKNOWN	SYBR	9.97125	9.96444	0.00962567	2.24545e+06			3	6	83.1556	83.0214
O17	AF090D	UNKNOWN	SYBR	10.8739	10.7736	0.141817	1.24141e+06	1.32878e+06	123555	3	7	82.753	84.2291
P17	AF090D	UNKNOWN	SYBR	10.6733	10.7736	0.141817	1.41614e+06			3	7	82.6188
A18	AF092A	UNKNOWN	SYBR	13.9357	13.9357	0	166262	83133.4	117562	3	10	83.0214
B18	AF092A	UNKNOWN	SYBR	29.9624	21.949	11.3325	4.47337			3	20	82.4846
C18	AF092B	UNKNOWN	SYBR	10.9984	11.0705	0.102051	1.14395e+06	1.09224e+06	73132.7	3	7	82.2162
D18	AF092B	UNKNOWN	SYBR	11.1427	11.0705	0.102051	1.04052e+06			3	7	82.3504
E18	AF092C	UNKNOWN	SYBR	11.7515	11.8776	0.178366	697681	644434	75301.7	3	8	84.2291
F18	AF092C	UNKNOWN	SYBR	12.0037	11.8776	0.178366	591188			3	8	84.2291
G18	AF092D	UNKNOWN	SYBR	10.3107	10.4968	0.263167	1.79681e+06	1.60203e+06	275456	3	7	84.3633
H18	AF092D	UNKNOWN	SYBR	10.6829	10.4968	0.263167	1.40725e+06			3	7	84.3633
I18	AF093A	UNKNOWN	SYBR	10.3075	10.4209	0.160452	1.80065e+06	1.67602e+06	176249	3	6	82.8872
J18	AF093A	UNKNOWN	SYBR	10.5344	10.4209	0.160452	1.5514e+06			3	7	83.0214
K18	AF093B	UNKNOWN	SYBR	12.7379	12.7436	0.00808208	365053	363689	1930.03	3	9	83.1556
L18	AF093B	UNKNOWN	SYBR	12.7494	12.7436	0.00808208	362324			3	9	83.1556
M18	AF093C	UNKNOWN	SYBR	14.304	14.1445	0.225579	130546	145756	21510.3	3	10	83.1556
N18	AF093C	UNKNOWN	SYBR	13.985	14.1445	0.225579	160966			3	10	83.0214
O18	AF093D	UNKNOWN	SYBR	12.4689	12.4463	0.031921	435596	442148	9266.71	3	8	83.424
P18	AF093D	UNKNOWN	SYBR	12.4237	12.4463	0.031921	448701			3	8	83.2898
A19	AF094A	UNKNOWN	SYBR	13.3702	13.3203	0.0705255	241030	249187	11535.2	3	9	84.9001
B19	AF094A	UNKNOWN	SYBR	13.2704	13.3203	0.0705255	257344			3	9	84.9001
C19	AF094B	UNKNOWN	SYBR	12.882	12.7766	0.149098	332093	356750	34869.7	3	9	85.0343
D19	AF094B	UNKNOWN	SYBR	12.6712	12.7766	0.149098	381407			3	9	85.0343
E19	AF094C	UNKNOWN	SYBR	12.5413	12.4423	0.139946	415368	444189	40758.8	3	8	84.9001
F19	AF094C	UNKNOWN	SYBR	12.3434	12.4423	0.139946	473010			3	8	85.0343
G19	AF094D	UNKNOWN	SYBR	11.863	11.9865	0.174629	648417	599886	68634.1	3	8	85.0343
H19	AF094D	UNKNOWN	SYBR	12.11	11.9865	0.174629	551354			3	8	85.1685
I19	AF103A	UNKNOWN	SYBR	11.738	11.6392	0.139712	703885	752637	68946.8	3	8	84.6317
J19	AF103A	UNKNOWN	SYBR	11.5404	11.6392	0.139712	801390			3	8	84.6317
K19	AF103B	UNKNOWN	SYBR	9.99987	9.99004	0.0139071	2.20364e+06	2.21796e+06	20252.9	3	6	84.6317
L19	AF103B	UNKNOWN	SYBR	9.98021	9.99004	0.0139071	2.23228e+06			3	6	84.4975
M19	AF103C	UNKNOWN	SYBR	10.1969	10.2332	0.0512836	1.93624e+06	1.89122e+06	63671.1	3	6	84.4975
N19	AF103C	UNKNOWN	SYBR	10.2694	10.2332	0.0512836	1.84619e+06			3	6	84.4975
O19	AF103D	UNKNOWN	SYBR	10.6041	10.5264	0.109914	1.48194e+06	1.56156e+06	112601	3	7	84.3633
P19	AF103D	UNKNOWN	SYBR	10.4487	10.5264	0.109914	1.64118e+06			3	6	84.6317
A20	AF106A	UNKNOWN	SYBR	11.3365	11.2591	0.10952	916180	965219	69350.7	3	8	82.8872
B20	AF106A	UNKNOWN	SYBR	11.1816	11.2591	0.10952	1.01426e+06			3	7	82.753
C20	AF106B	UNKNOWN	SYBR	11.454	11.5192	0.0921593	848152	813370	49188.9	3	7	83.9607
D20	AF106B	UNKNOWN	SYBR	11.5844	11.5192	0.0921593	778588			3	8	83.9607
E20	AF106C	UNKNOWN	SYBR	11.9625	11.9103	0.0739539	607385	628973	30529.8	3	8	83.2898
F20	AF106C	UNKNOWN	SYBR	11.858	11.9103	0.0739539	650560			3	8	83.2898
G20	AF106D	UNKNOWN	SYBR	9.95462	10.3703	0.587846	2.2701e+06	1.79263e+06	675241	3	7	83.9607
H20	AF106D	UNKNOWN	SYBR	10.786	10.3703	0.587846	1.31516e+06			3	7	83.8265
A12	B.Long 15707-1	STANDARD	SYBR	7.7452	7.78078	0.0503166	9.68463e+06	9.46359e+06	312603	3	5	84.0949
B12	B.Long 15707-1	STANDARD	SYBR	7.81636	7.78078	0.0503166	9.24255e+06			3	5	84.2291
C12	B.Long 15707-2	STANDARD	SYBR	12.4279	12.4498	0.0310713	447478	441115	8998.72	3	8	84.3633
D12	B.Long 15707-2	STANDARD	SYBR	12.4718	12.4498	0.0310713	434752			3	8	83.6924
E12	B.Long 15707-3	STANDARD	SYBR	15.8304	15.7474	0.11741	47918.7	50678.5	3903.03	3	12	84.3633
F12	B.Long 15707-3	STANDARD	SYBR	15.6644	15.7474	0.11741	53438.4			3	11	84.3633
G12	B.Long 15707-4	STANDARD	SYBR	19.8438	20.3013	0.647052	3436.01	2660.07	1097.34	3	15	84.0949
H12	B.Long 15707-4	STANDARD	SYBR	20.7588	20.3013	0.647052	1884.14			3	16	84.0949
M12	NTC	NTC	SYBR	Undetermined			#VALUE!	#VALUE!	#VALUE!	3	39	61.2822
N12	NTC	NTC	SYBR	Undetermined			#VALUE!			3	39	61.5506
O12	NTC	NTC	SYBR	Undetermined			#VALUE!	#VALUE!	#VALUE!	3	39	61.9532
P12	NTC	NTC	SYBR	38.8561						3	34	73.8963

## Sheet: Universal_P3
Block Type	384-Well Block
Calibration Background is expired	Yes
Calibration Background performed on	2015-09-28 10:38:58 AM NZDT
Calibration FAM is expired	Yes
Calibration FAM performed on	2015-09-28 12:44:37 PM NZDT
Calibration NED is expired	Yes
Calibration NED performed on	2015-09-28 12:27:45 PM NZDT
Calibration ROI is expired	Yes
Calibration ROI performed on	2015-09-28 10:31:42 AM NZDT
Calibration ROX is expired	Yes
Calibration ROX performed on	2015-09-28 11:50:26 AM NZDT
Calibration SYBR is expired	Yes
Calibration SYBR performed on	2015-09-28 11:35:56 AM NZDT
Calibration TAMRA is expired	Yes
Calibration TAMRA performed on	2015-09-28 12:05:53 PM NZDT
Calibration Uniformity is expired	Yes
Calibration Uniformity performed on	2015-09-28 11:17:29 AM NZDT
Calibration VIC is expired	Yes
Calibration VIC performed on	2015-09-28 12:36:53 PM NZDT
Chemistry	SYBR_GREEN
Experiment File Name	E:\Taq sialidase - Kinase comparisons\07-Chin formula 384 p3 sybr.eds
Experiment Name	Chinese formula 384 plate 3
Experiment Run Start Time	2016-06-28 21:56:11 PM NZST
Experiment Run Stop Time	2016-06-28 23:07:27 PM NZST
Experiment Type	Standard Curve
Instrument Name	ViiA7
Instrument Serial Number	278880388
Instrument Type	ViiA(TM) 7 System
Passive Reference	ROX
Quantification Cycle Method	Ct
Signal Smoothing On	true
Stage/ Cycle where Analysis is performed	Stage 2, Step 2
Well Position	Sample Name	Reporter	CT	Ct Mean	Ct SD	Quant by formula	Av. Q/formula	SD Q/formula	Baseline Start	Baseline End	Tm1	Tm2
A1	AF026A	SYBR	9.6946	9.63986	0.0774153	2.69272e+06	2.79307e+06	141915	3	6	83.029
B1	AF026A	SYBR	9.58512	9.63986	0.0774153	2.89342e+06			3	6	83.1633
C1	AF026B	SYBR	12.2243	12.1876	0.0518204	511482	524089	17828.9	3	8	82.6263
D1	AF026B	SYBR	12.151	12.1876	0.0518204	536696			3	8	83.029
E1	AF026C	SYBR	11.708	11.6741	0.047984	717861	734216	23128.6	3	8	82.4921
F1	AF026C	SYBR	11.6402	11.6741	0.047984	750570			3	8	82.4921
G1	AF026D	SYBR	12.5515	12.4468	0.148063	412585	442990	42999.4	3	8	82.6263
H1	AF026D	SYBR	12.3421	12.4468	0.148063	473396			3	8	83.029
I1	AF035A	SYBR	10.6356	10.5279	0.152249	1.45164e+06	1.56187e+06	155877	3	7	83.9687
J1	AF035A	SYBR	10.4203	10.5279	0.152249	1.67209e+06			3	7	84.3714
K1	AF035B	SYBR	10.2458	10.1845	0.0867416	1.87502e+06	1.95366e+06	111211	3	7	83.2975
L1	AF035B	SYBR	10.1232	10.1845	0.0867416	2.0323e+06			3	6	83.4317
M1	AF035C	SYBR	11.7481	11.717	0.0440317	699209	713800	20634	3	8	83.7002
N1	AF035C	SYBR	11.6859	11.717	0.0440317	728390			3	8	83.7002
O1	AF035D	SYBR	9.75777	10.724	1.3664	2.58333e+06	1.65484e+06	1.31309e+06	4	8	83.7002
P1	AF035D	SYBR	11.6901	10.724	1.3664	726343			3	8	83.8344
A2	AF036A	SYBR	12.952	12.8927	0.0839518	317180	330038	18183.6	3	9	82.8948
B2	AF036A	SYBR	12.8333	12.8927	0.0839518	342895			3	9	83.029
C2	AF036B	SYBR	11.3089	11.3893	0.113817	932976	886190	66166.1	3	7	84.9083
D2	AF036B	SYBR	11.4698	11.3893	0.113817	839403			3	8	84.9083
E2	AF036C	SYBR	10.124	10.194	0.0990788	2.0312e+06	1.94193e+06	126245	3	6	85.0426
F2	AF036C	SYBR	10.2641	10.194	0.0990788	1.85266e+06			3	7	85.0426
G2	AF036D	SYBR	9.72176	9.62009	0.143781	2.64514e+06	2.83405e+06	267160	3	6	85.0426
H2	AF036D	SYBR	9.51842	9.62009	0.143781	3.02296e+06			3	6	85.1768
I2	AF039A	SYBR	11.9867	12.1297	0.202355	597845	546638	72417.7	3	8	83.9687
J2	AF039A	SYBR	12.2728	12.1297	0.202355	495431			3	9	83.8344
K2	AF039B	SYBR	10.6605	10.615	0.0643525	1.4281e+06	1.47207e+06	62182.5	3	7	83.9687
L2	AF039B	SYBR	10.5695	10.615	0.0643525	1.51604e+06			3	7	83.9687
M2	AF039C	SYBR	11.2924	11.3877	0.134766	943083	887617	78441.3	3	7	83.7002
N2	AF039C	SYBR	11.483	11.3877	0.134766	832151			3	8	83.7002
O2	AF039D	SYBR	11.8803	11.8439	0.0514846	641093	656790	22198.5	3	8	83.566
P2	AF039D	SYBR	11.8075	11.8439	0.0514846	672487			3	8	83.566
A3	AF041A	SYBR	12.3593	12.387	0.0392606	468092	459713	11849.4	3	8	82.8948
B3	AF041A	SYBR	12.4148	12.387	0.0392606	451334			3	8	82.8948
C3	AF041B	SYBR	11.2911	11.3342	0.0610361	943949	917943	36778.2	3	8	83.7002
D3	AF041B	SYBR	11.3774	11.3342	0.0610361	891937			3	7	83.7002
E3	AF041C	SYBR	10.4881	10.5825	0.133409	1.59923e+06	1.50606e+06	131758	3	7	83.4317
F3	AF041C	SYBR	10.6768	10.5825	0.133409	1.41289e+06			3	7	83.566
G3	AF041D	SYBR	11.474	11.5051	0.0439791	837097	820349	23685.6	3	8	83.8344
H3	AF041D	SYBR	11.5362	11.5051	0.0439791	803601			3	8	83.7002
I3	AF043A	SYBR	11.7546	11.6747	0.113004	696241	734756	54468.3	3	8	84.1029
J3	AF043A	SYBR	11.5948	11.6747	0.113004	773271			3	8	84.1029
K3	AF043B	SYBR	10.7046	10.5299	0.247152	1.38729e+06	1.56623e+06	253061	3	7	83.9687
L3	AF043B	SYBR	10.3551	10.5299	0.247152	1.74517e+06			3	6	83.9687
M3	AF043C	SYBR	10.7286	10.7326	0.00575827	1.36567e+06	1.36203e+06	5149.75	3	7	83.9687
N3	AF043C	SYBR	10.7367	10.7326	0.00575827	1.35839e+06			3	7	83.9687
O3	AF043D	SYBR	10.3942	10.2753	0.168131	1.70093e+06	1.84463e+06	203227	3	7	82.8948
P3	AF043D	SYBR	10.1565	10.2753	0.168131	1.98834e+06			3	7	82.8948
A4	AF045A	SYBR	10.8852	10.8618	0.0331557	1.23219e+06	1.25145e+06	27242.1	3	7	85.0426
B4	AF045A	SYBR	10.8383	10.8618	0.0331557	1.27071e+06			3	7	85.0426
C4	AF045B	SYBR	9.86597	9.88012	0.0199999	2.40616e+06	2.38402e+06	31306.6	3	6	85.0426
D4	AF045B	SYBR	9.89426	9.88012	0.0199999	2.36188e+06			3	6	85.0426
E4	AF045C	SYBR	9.18593	9.228	0.0594911	3.76049e+06	3.65944e+06	142909	3	6	85.0426
F4	AF045C	SYBR	9.27007	9.228	0.0594911	3.55838e+06			3	6	85.1768
G4	AF045D	SYBR	9.32743	9.33628	0.0125159	3.42685e+06	3.40706e+06	27998.7	3	6	85.1768
H4	AF045D	SYBR	9.34513	9.33628	0.0125159	3.38726e+06			3	6	85.1768
I4	AF048A	SYBR	9.53783	9.71812	0.254965	2.98468e+06	2.67007e+06	444924	3	6	85.4453
J4	AF048A	SYBR	9.89841	9.71812	0.254965	2.35546e+06			3	6	85.0426
K4	AF048B	SYBR	10.4943	10.5218	0.0389073	1.59279e+06	1.56454e+06	39964.3	3	7	85.0426
L4	AF048B	SYBR	10.5493	10.5218	0.0389073	1.53628e+06			3	7	85.0426
M4	AF048C	SYBR	10.6975	10.6881	0.0132854	1.39383e+06	1.40248e+06	12233.8	3	7	85.0426
N4	AF048C	SYBR	10.6787	10.6881	0.0132854	1.41113e+06			3	7	85.0426
O4	AF048D	SYBR	9.8828	9.92976	0.0664133	2.37971e+06	2.30855e+06	100638	3	6	84.1029
P4	AF048D	SYBR	9.97673	9.92976	0.0664133	2.23739e+06			3	6	83.9687
A5	AF051A	SYBR	17.7034	17.4533	0.353644	14009.2	16732.1	3850.73	3	14	84.7741
B5	AF051A	SYBR	17.2032	17.4533	0.353644	19455			3	13	84.7741
C5	AF051B	SYBR	17.4168	16.1786	1.75113	16909.1	51436	48828.4	3	13	84.1029
D5	AF051B	SYBR	14.9404	16.1786	1.75113	85963			3	11	84.2372
E5	AF051C	SYBR	9.44037	9.51203	0.101337	3.18192e+06	3.03904e+06	202062	3	6	85.1768
F5	AF051C	SYBR	9.58368	9.51203	0.101337	2.89616e+06			3	6	85.311
G5	AF051D	SYBR	6.505	6.4226	0.116529	2.18645e+07	2.31138e+07	1.7668e+06	3	5	85.311
H5	AF051D	SYBR	6.34021	6.4226	0.116529	2.43631e+07			3	5	85.311
I5	AF052A	SYBR	11.362	11.4498	0.124282	901004	851902	69441.6	3	8	84.1029
J5	AF052A	SYBR	11.5377	11.4498	0.124282	802799			3	8	84.2372
K5	AF052B	SYBR	9.3971	9.89581	0.705281	3.27362e+06	2.48711e+06	1.11229e+06	3	7	84.2372
L5	AF052B	SYBR	10.3945	9.89581	0.705281	1.70061e+06			3	7	84.2372
M5	AF052C	SYBR	11.0175	11.2931	0.389773	1.12969e+06	958165	242578	3	7	84.1029
N5	AF052C	SYBR	11.5687	11.2931	0.389773	786636			3	8	84.1029
O5	AF052D	SYBR	10.1938	10.2375	0.0619093	1.94022e+06	1.88603e+06	76645.9	3	6	84.5056
P5	AF052D	SYBR	10.2813	10.2375	0.0619093	1.83183e+06			3	7	84.5056
A6	AF056A	SYBR	11.6659	11.6363	0.0417827	738021	752619	20645.1	3	8	85.311
B6	AF056A	SYBR	11.6068	11.6363	0.0417827	767217			3	8	85.0426
C6	AF056B	SYBR	10.8463	10.8467	0.000590056	1.26406e+06	1.26372e+06	489.921	3	7	85.4453
D6	AF056B	SYBR	10.8472	10.8467	0.000590056	1.26337e+06			3	7	85.1768
E6	AF056C	SYBR	10.2695	10.186	0.118129	1.84606e+06	1.95307e+06	151337	3	7	85.4453
F6	AF056C	SYBR	10.1025	10.186	0.118129	2.06008e+06			3	6	85.1768
G6	AF056D	SYBR	10.8758	10.8598	0.0226352	1.23982e+06	1.25298e+06	18621.7	3	7	85.5795
H6	AF056D	SYBR	10.8438	10.8598	0.0226352	1.26615e+06			3	7	85.311
I6	AF059A	SYBR	10.9154	10.9541	0.0546871	1.20802e+06	1.17811e+06	42294.2	3	7	83.9687
J6	AF059A	SYBR	10.9927	10.9541	0.0546871	1.1482e+06			3	7	83.566
K6	AF059B	SYBR	13.8159	13.7248	0.128844	179870	191300	16164.6	3	10	84.1029
L6	AF059B	SYBR	13.6337	13.7248	0.128844	202730			3	10	83.7002
M6	AF059C	SYBR	12.5204	12.3843	0.192532	421094	462311	58289	3	9	82.3579
N6	AF059C	SYBR	12.2481	12.3843	0.192532	503528			3	8	82.3579
O6	AF059D	SYBR	12.1831	12.0661	0.165419	525496	569120	61693.6	3	8	82.6263
P6	AF059D	SYBR	11.9492	12.0661	0.165419	612744			3	8	82.4921
A7	AF073A	SYBR	10.94	11.2454	0.431857	1.18864e+06	992302	277666	3	7	85.311
B7	AF073A	SYBR	11.5507	11.2454	0.431857	795963			3	8	85.311
C7	AF073B	SYBR	13.6396	13.5495	0.127486	201947	214636	17945.8	3	10	83.029	85.311
D7	AF073B	SYBR	13.4593	13.5495	0.127486	227326			3	9	82.8948	85.1768
E7	AF073C	SYBR	11.8009	11.798	0.00407644	675409	676690	1811.25	3	8	83.566
F7	AF073C	SYBR	11.7951	11.798	0.00407644	677970			3	8	83.566
G7	AF073D	SYBR	12.4689	12.1093	0.508621	551606	625069	103893	3	9	85.311
H7	AF073D	SYBR	11.7496	12.1093	0.508621	698532			3	9	85.4453
I7	AF080A	SYBR	11.964	11.9523	0.0165007	606812	611497	6625.1	3	8	82.6263
J7	AF080A	SYBR	11.9406	11.9523	0.0165007	616182			3	8	82.6263
K7	AF080B	SYBR	11.2943	11.4476	0.216766	941945	856077	121436	3	7	82.4921
L7	AF080B	SYBR	11.6008	11.4476	0.216766	770209			3	8	82.0894
M7	AF080C	SYBR	10.4743	10.5004	0.0368566	1.61377e+06	1.58663e+06	38392.9	3	7	85.0426
N7	AF080C	SYBR	10.5265	10.5004	0.0368566	1.55948e+06			3	7	85.0426
O7	AF080D	SYBR	10.3219	10.3347	0.0181609	1.78366e+06	1.76875e+06	21090.7	3	7	85.0426
P7	AF080D	SYBR	10.3476	10.3347	0.0181609	1.75384e+06			3	7	85.0426
A8	AF083A	SYBR	11.3415	11.1791	0.229657	913195	1.02173e+06	153490	3	7	83.2975
B8	AF083A	SYBR	11.0167	11.1791	0.229657	1.13026e+06			3	7	83.2975
C8	AF083B	SYBR	13.3107	13.3307	0.0283207	250622	247369	4599.75	3	9	82.0894
D8	AF083B	SYBR	13.3508	13.3307	0.0283207	244117			3	9	82.2236
E8	AF083C	SYBR	10.7175	10.744	0.0374014	1.3756e+06	1.35212e+06	33202.4	3	7	84.2372
F8	AF083C	SYBR	10.7704	10.744	0.0374014	1.32865e+06			3	7	84.3714
G8	AF083D	SYBR	11.5287	11.7176	0.267227	807589	718855	125489	3	8	84.5056
H8	AF083D	SYBR	11.9066	11.7176	0.267227	630121			3	8	84.2372
I8	AF086A	SYBR	9.6676	9.65685	0.0152066	2.74089e+06	2.76038e+06	27562	3	6	85.311
J8	AF086A	SYBR	9.6461	9.65685	0.0152066	2.77987e+06			3	6	85.311
K8	AF086B	SYBR	11.2565	11.6878	0.609959	965614	756832	295262	3	8	85.311
L8	AF086B	SYBR	12.1191	11.6878	0.609959	548051			3	8	85.1768
M8	AF086C	SYBR	9.75867	9.75963	0.00135275	2.5818e+06	2.58018e+06	2291.68	3	6	85.311
N8	AF086C	SYBR	9.76058	9.75963	0.00135275	2.57856e+06			3	6	85.1768
O8	AF086D	SYBR	9.33582	9.37332	0.053041	3.40803e+06	3.32614e+06	115817	3	6	85.311
P8	AF086D	SYBR	9.41083	9.37332	0.053041	3.24424e+06			3	6	85.1768
A9	AF088A	SYBR	11.2682	11.1209	0.208213	958232	1.06043e+06	144525	3	8	83.566
B9	AF088A	SYBR	10.9737	11.1209	0.208213	1.16262e+06			3	7	83.566
C9	AF088B	SYBR	10.534	10.4854	0.068783	1.55176e+06	1.60293e+06	72368.8	3	7	82.2236
D9	AF088B	SYBR	10.4367	10.4854	0.068783	1.6541e+06			3	6	82.2236
E9	AF088C	SYBR	10.97	10.9711	0.0016616	1.16549e+06	1.16459e+06	1270.12	3	7	84.2372
F9	AF088C	SYBR	10.9723	10.9711	0.0016616	1.16369e+06			3	7	84.2372
G9	AF088D	SYBR	11.2243	11.2901	0.0930994	986270	945429	57757.5	3	7	84.3714
H9	AF088D	SYBR	11.3559	11.2901	0.0930994	904588			3	7	84.2372
I9	AF089A	SYBR	15.2657	15.07	0.276798	69426.1	79600	14388	3	12	82.6263
J9	AF089A	SYBR	14.8743	15.07	0.276798	89773.8			3	12	82.6263
K9	AF089B	SYBR	12.1239	12.1877	0.0902367	546327	524370	31050.8	3	8	85.4453	82.2236
L9	AF089B	SYBR	12.2515	12.1877	0.0902367	502414			3	8	85.1768	82.0894
M9	AF089C	SYBR	9.71315	9.77176	0.0828924	2.66013e+06	2.5616e+06	139353	3	6	85.311
N9	AF089C	SYBR	9.83038	9.77176	0.0828924	2.46306e+06			3	6	85.1768
O9	AF089D	SYBR	10.8355	10.8057	0.0421145	1.27307e+06	1.29846e+06	35901.3	3	7	85.311
P9	AF089D	SYBR	10.7759	10.8057	0.0421145	1.32384e+06			3	7	85.1768
A10	AF091A	SYBR	12.2421	12.3168	0.105672	505524	481900	33409.7	3	8	82.3579
B10	AF091A	SYBR	12.3916	12.3168	0.105672	458275			3	9	82.3579
C10	AF091B	SYBR	10.8999	10.9066	0.00952991	1.22037e+06	1.21499e+06	7602.45	3	7	82.7606	85.0426
D10	AF091B	SYBR	10.9134	10.9066	0.00952991	1.20962e+06			3	7	82.6263	84.7741
E10	AF091C	SYBR	13.8867	13.9127	0.0367932	171701	168817	4077.96	3	10	85.1768
F10	AF091C	SYBR	13.9387	13.9127	0.0367932	165934			3	10	85.0426
G10	AF091D	SYBR	10.6948	10.6813	0.0190389	1.39631e+06	1.40876e+06	17611.2	3	7	83.2975
H10	AF091D	SYBR	10.6679	10.6813	0.0190389	1.42122e+06			3	7	83.1633
I10	AF095A	SYBR	11.3073	11.6017	0.416274	933918	784211	211717	3	8	84.3714
J10	AF095A	SYBR	11.896	11.6017	0.416274	634504			3	8	83.2975
K10	AF095B	SYBR	13.3134	13.2902	0.0328031	250177	254046	5471.33	3	10	84.3714
L10	AF095B	SYBR	13.267	13.2902	0.0328031	257915			3	10	84.3714
M10	AF095C	SYBR	10.7104	10.803	0.130982	1.3821e+06	1.30296e+06	111920	3	7	84.2372
N10	AF095C	SYBR	10.8956	10.803	0.130982	1.22382e+06			3	7	84.1029
O10	AF095D	SYBR	11.1198	11.3558	0.333646	1.05626e+06	915557	198985	3	7	84.6399
P10	AF095D	SYBR	11.5917	11.3558	0.333646	774853			3	8	83.9687
A11	AF096A	SYBR	8.89919	8.89598	0.00453298	4.53955e+06	4.54912e+06	13540.7	3	6	85.311
B11	AF096A	SYBR	8.89278	8.89598	0.00453298	4.5587e+06			3	6	85.311
C11	AF096B	SYBR	12.7704	12.8203	0.0704527	357344	346029	16001.5	3	9	85.311
D11	AF096B	SYBR	12.8701	12.8203	0.0704527	334714			3	9	85.311
E11	AF096C	SYBR	10.2764	10.3757	0.140392	1.83769e+06	1.72539e+06	158826	3	6	85.311	82.6263
F11	AF096C	SYBR	10.475	10.3757	0.140392	1.61308e+06			3	7	85.311	82.6263
G11	AF096D	SYBR	10.3313	10.2864	0.0634637	1.77272e+06	1.82653e+06	76090.3	3	7	85.4453
H11	AF096D	SYBR	10.2415	10.2864	0.0634637	1.88033e+06			3	7	85.4453
I11	AF097A	SYBR	21.494	23.3717	2.65553	1162.72	630.736	752.335	3	17	84.3714
J11	AF097A	SYBR	25.2495	23.3717	2.65553	98.7548			3	21	84.1029
K11	AF097B	SYBR	10.8097	10.7922	0.0247244	1.29482e+06	1.30986e+06	21263.8	3	7	84.2372
L11	AF097B	SYBR	10.7747	10.7922	0.0247244	1.32489e+06			3	7	84.1029
M11	AF097C	SYBR	11.4527	11.4359	0.0237142	848901	858351	13364.6	3	8	83.8344
N11	AF097C	SYBR	11.4191	11.4359	0.0237142	867801			3	8	83.8344
O11	AF097D	SYBR	11.9075	11.9185	0.0155417	629753	625241	6380.25	3	8	85.4453
P11	AF097D	SYBR	11.9294	11.9185	0.0155417	620730			3	8	85.311
A13	AF098A	SYBR	8.08825	8.24102	0.216062	7.73146e+06	7.02872e+06	993820	3	6	82.7606
B13	AF098A	SYBR	8.3938	8.24102	0.216062	6.32598e+06			3	6	82.7606
C13	AF098B	SYBR	7.99757	8.10402	0.15054	8.20575e+06	7.6705e+06	756961	3	5	82.8948
D13	AF098B	SYBR	8.21046	8.10402	0.15054	7.13525e+06			3	5	82.8948
E13	AF098C	SYBR	10.5009	10.5334	0.0459542	1.58586e+06	1.55273e+06	46844.7	3	7	83.7002
F13	AF098C	SYBR	10.5659	10.5334	0.0459542	1.51961e+06			3	7	83.7002
G13	AF098D	SYBR	10.3537	10.2755	0.110672	1.74679e+06	1.84132e+06	133686	3	7	82.6263
H13	AF098D	SYBR	10.1972	10.2755	0.110672	1.93585e+06			3	6	82.6263
I13	AF099A	SYBR	6.97006	7.15039	0.255021	1.6111e+07	1.44125e+07	2.40213e+06	3	5	82.7606
J13	AF099A	SYBR	7.33071	7.15039	0.255021	1.27139e+07			3	5	82.4921
K13	AF099B	SYBR	7.65506	7.65638	0.00186323	1.02752e+07	1.02663e+07	12559.8	3	5	82.6263
L13	AF099B	SYBR	7.65769	7.65638	0.00186323	1.02574e+07			3	5	82.8948
M13	AF099C	SYBR	9.26707	9.38836	0.171528	3.56538e+06	3.3029e+06	371208	3	6	85.0426
N13	AF099C	SYBR	9.50965	9.38836	0.171528	3.04042e+06			3	6	85.1768	83.029
O13	AF099D	SYBR	10.7929	10.8175	0.0347877	1.30915e+06	1.28835e+06	29425.4	3	7	82.7606
P13	AF099D	SYBR	10.8421	10.8175	0.0347877	1.26754e+06			3	7	83.029
A14	AF102A	SYBR	8.96613	9.19256	0.320232	4.34435e+06	3.78561e+06	790174	3	6	82.6263
B14	AF102A	SYBR	9.419	9.19256	0.320232	3.22687e+06			3	6	82.6263
C14	AF102B	SYBR	10.4405	10.4743	0.0477723	1.65002e+06	1.61422e+06	50625.8	3	7	83.029
D14	AF102B	SYBR	10.5081	10.4743	0.0477723	1.57843e+06			3	7	83.029
E14	AF102C	SYBR	8.65255	8.95144	0.42268	5.33756e+06	4.4712e+06	1.22522e+06	3	6	82.6263
F14	AF102C	SYBR	9.25032	8.95144	0.42268	3.60483e+06			3	6	82.6263
G14	AF102D	SYBR	11.774	11.8724	0.139062	687422	645785	58884	3	8	82.8948
H14	AF102D	SYBR	11.9707	11.8724	0.139062	604147			3	8	82.8948
A12	B.Long 15707-1	SYBR	7.56559	7.65091	0.120665	1.08969e+07	1.03194e+07	816740	3	5	84.2372
B12	B.Long 15707-1	SYBR	7.73623	7.65091	0.120665	9.74184e+06			3	5	84.1029
C12	B.Long 15707-2	SYBR	12.4803	12.6148	0.190181	432338	397344	49489.4	3	9	84.2372
D12	B.Long 15707-2	SYBR	12.7493	12.6148	0.190181	362349			3	9	84.2372
E12	B.Long 15707-3	SYBR	16.1254	16.1369	0.0161871	39480	39185.5	416.477	3	12	84.2372
F12	B.Long 15707-3	SYBR	16.1483	16.1369	0.0161871	38891.1			3	12	84.3714
G12	B.Long 15707-4	SYBR	21.291	21.192	0.139986	1328.52	1420.73	130.404	3	17	84.2372
H12	B.Long 15707-4	SYBR	21.093	21.192	0.139986	1512.94			3	17	84.2372
I14	BF001	SYBR	10.3562	10.3562	0	1.7439e+06	4.26608e+06	3.56689e+06	3	6	83.1633
J14	BF001	SYBR	8.28639	9.32131	1.4636	6.78825e+06			3	6	83.029
K14	BF002	SYBR	6.39549	6.48202	0.122367	2.34946e+07	2.22328e+07	1.78443e+06	3	4	83.1633
L14	BF002	SYBR	6.56855	6.48202	0.122367	2.0971e+07			3	4	82.8948
M14	BF003	SYBR	7.46992	7.30014	0.240101	1.16034e+07	1.30524e+07	2.04925e+06	3	6	83.2975
N14	BF003	SYBR	7.13036	7.30014	0.240101	1.45014e+07			3	5	83.029
O14	BF004	SYBR	10.0475	10.0475	0	2.13582e+06	3.36948e+06	1.74466e+06	3	6	83.4317
P14	BF004	SYBR	8.878	9.46274	0.826945	4.60314e+06			3	6	83.1633
A15	BF005	SYBR	7.993	8.07687	0.118611	8.23042e+06	7.80124e+06	606953	3	6	82.3579	85.0426
B15	BF005	SYBR	8.16074	8.07687	0.118611	7.37206e+06			3	6	82.2236	85.0426
C15	BF006	SYBR	6.35627	6.62856	0.385066	2.41074e+07	2.04838e+07	5.12458e+06	3	4	83.2975
D15	BF006	SYBR	6.90084	6.62856	0.385066	1.68602e+07			3	5	83.2975
E15	BF007	SYBR	7.7745	7.80234	0.0393753	9.50012e+06	9.32958e+06	241181	3	6	83.8344
F15	BF007	SYBR	7.83018	7.80234	0.0393753	9.15904e+06			3	6	83.8344
G15	BF008	SYBR	7.55606	7.5123	0.0618871	1.09653e+07	1.12896e+07	458630	3	5	83.1633
H15	BF008	SYBR	7.46854	7.5123	0.0618871	1.16139e+07			3	5	83.1633
I15	BF009	SYBR	7.29449	7.30344	0.0126616	1.30199e+07	1.29439e+07	107609	3	5	83.4317
J15	BF009	SYBR	7.3124	7.30344	0.0126616	1.28678e+07			3	5	83.2975
K15	BF010	SYBR	6.81795	7.15117	0.47125	1.78032e+07	1.46484e+07	4.46162e+06	3	5	83.1633	85.1768
L15	BF010	SYBR	7.4844	7.15117	0.47125	1.14936e+07			3	5	82.8948	84.7741
M15	BF011	SYBR	6.60367	6.74573	0.200898	2.04929e+07	1.87491e+07	2.46606e+06	3	4	83.029
N15	BF011	SYBR	6.88778	6.74573	0.200898	1.70053e+07			3	4	82.7606
O15	BF012	SYBR	Undetermined			#VALUE!	#VALUE!	#VALUE!	3	6	82.8948
P15	BF012	SYBR	Undetermined			#VALUE!			3	6	82.7606	84.7741
A16	BF013	SYBR	6.74462	6.75988	0.0215738	1.86814e+07	1.84961e+07	261998	3	5	85.1768
B16	BF013	SYBR	6.77513	6.75988	0.0215738	1.83109e+07			3	5	85.1768
C16	BF014	SYBR	11.3069	11.4492	0.201366	934206	854545	112658	3	8	85.1768	82.6263
D16	BF014	SYBR	11.5916	11.4492	0.201366	774884			3	8	85.0426	82.4921
E16	BF015	SYBR	9.38513	9.36462	0.0290139	3.29944e+06	3.34449e+06	63711.3	3	6	84.6399
F16	BF015	SYBR	9.3441	9.36462	0.0290139	3.38955e+06			3	6	84.6399
G16	BF016	SYBR	13.0086	13.1013	0.131037	305611	288105	24757.9	3	9	85.0426
H16	BF016	SYBR	13.1939	13.1013	0.131037	270599			3	9	85.0426
I16	BF017	SYBR	8.1673	8.4469	0.395408	7.34036e+06	6.21248e+06	1.59505e+06	3	6	85.1768
J16	BF017	SYBR	8.72649	8.4469	0.395408	5.08461e+06			3	6	85.1768
K16	BF018	SYBR	9.84119	9.9796	0.195736	2.44563e+06	2.2424e+06	287406	3	6	85.0426
L16	BF018	SYBR	10.118	9.9796	0.195736	2.03917e+06			3	6	85.0426
M16	BF019	SYBR	7.86381	7.88305	0.0272056	8.95903e+06	8.84729e+06	158034	3	5	85.0426
N16	BF019	SYBR	7.90229	7.88305	0.0272056	8.73554e+06			3	5	85.0426
O16	BF021	SYBR	7.53232	7.46672	0.0927747	1.11375e+07	1.16385e+07	708540	3	5	84.2372
P16	BF021	SYBR	7.40112	7.46672	0.0927747	1.21396e+07			3	5	84.2372
A17	BF022	SYBR	6.92889	6.944	0.0213637	1.65525e+07	1.63899e+07	229902	3	5	85.0426
B17	BF022	SYBR	6.9591	6.944	0.0213637	1.62273e+07			3	5	85.0426
C17	BF023	SYBR	8.40955	8.38607	0.033211	6.26091e+06	6.35896e+06	138657	3	5	83.7002
D17	BF023	SYBR	8.36258	8.38607	0.033211	6.457e+06			3	5	83.7002
E17	BF024	SYBR	7.66974	7.75774	0.124458	1.01766e+07	9.62128e+06	785375	3	5	83.9687
F17	BF024	SYBR	7.84574	7.75774	0.124458	9.06594e+06			3	5	83.8344
G17	BF025	SYBR	9.85102	9.92363	0.102676	2.42989e+06	2.31941e+06	156250	3	7	84.2372
H17	BF025	SYBR	9.99623	9.92363	0.102676	2.20892e+06			3	6	84.2372
I17	BF026	SYBR	9.9668	10.03	0.0893648	2.25202e+06	2.16236e+06	126809	3	6	84.2372	80.6128
J17	BF026	SYBR	10.0932	10.03	0.0893648	2.07269e+06			3	7	84.1029	80.4786
K17	BF027	SYBR	9.95746	9.91403	0.0614191	2.26588e+06	2.33237e+06	94034.9	3	6	84.2372
L17	BF027	SYBR	9.8706	9.91403	0.0614191	2.39886e+06			3	6	84.1029
M17	BF028	SYBR	8.1491	8.47383	0.459238	7.42861e+06	6.13911e+06	1.82363e+06	3	6	83.9687
N17	BF028	SYBR	8.79856	8.47383	0.459238	4.84961e+06			3	6	83.9687
O17	BF029	SYBR	8.90596	8.83574	0.0993061	4.51941e+06	4.7377e+06	308703	3	6	84.2372
P17	BF029	SYBR	8.76552	8.83574	0.0993061	4.95599e+06			3	6	84.2372
A18	BF030	SYBR	7.61127	7.74607	0.19064	1.05749e+07	9.71704e+06	1.21317e+06	3	6	84.1029
B18	BF030	SYBR	7.88088	7.74607	0.19064	8.8592e+06			3	6	84.1029
C18	BF031	SYBR	7.3943	7.35728	0.0523626	1.2194e+07	1.24978e+07	429608	3	5	85.1768
D18	BF031	SYBR	7.32025	7.35728	0.0523626	1.28015e+07			3	5	85.1768
E18	BF032	SYBR	14.1762	14.1807	0.00631663	141978	141563	587.131	3	10	83.2975
F18	BF032	SYBR	14.1851	14.1807	0.00631663	141148			3	10	83.029
G18	BF033	SYBR	6.75558	6.68919	0.0938826	1.85475e+07	1.93922e+07	1.19465e+06	3	4	85.311
H18	BF033	SYBR	6.62281	6.68919	0.0938826	2.0237e+07			3	4	85.311
I18	BF034	SYBR	8.3629	8.04083	0.45548	6.45566e+06	8.15498e+06	2.4032e+06	3	6	85.1768		Questionable curves
J18	BF034	SYBR	7.71875	8.04083	0.45548	9.85429e+06			3	6	85.1768	82.7606	Questionable curves
K18	BF035	SYBR	Undetermined	9.86048		#VALUE!	#VALUE!	#VALUE!	3	9	84.6399		Questionable curves
L18	BF035	SYBR	9.86048	9.86048		2.41485e+06			3	9	85.0426		Questionable curves
M18	BF036	SYBR	7.81823	7.96947	0.213884	9.2312e+06	8.39979e+06	1.17578e+06	3	6	84.2372
N18	BF036	SYBR	8.12071	7.96947	0.213884	7.56839e+06			3	6	84.2372
O18	BF037	SYBR	8.43901	8.39087	0.068085	6.14097e+06	6.34136e+06	283397	3	6	82.8948
P18	BF037	SYBR	8.34272	8.39087	0.068085	6.54175e+06			3	6	82.7606
A19	BF038	SYBR	8.8739	8.77085	0.145736	4.61556e+06	4.94999e+06	472949	3	6	84.5056
B19	BF038	SYBR	8.66779	8.77085	0.145736	5.28441e+06			3	6	84.6399
C19	BF039	SYBR	8.59046	8.72754	0.193864	5.55968e+06	5.10172e+06	647660	3	6	82.3579
D19	BF039	SYBR	8.86462	8.72754	0.193864	4.64375e+06			3	6	82.3579
E19	BF040	SYBR	8.82704	9.68244	1.20972	4.75978e+06	3.15382e+06	2.27116e+06	3	6	85.1768	82.2236
F19	BF040	SYBR	10.5378	10.5378	0	1.54787e+06			3	7	84.7741	81.9552
G19	BF041	SYBR	7.77998	7.79287	0.0182203	9.46597e+06	9.38657e+06	112295	3	6	85.1768
H19	BF041	SYBR	7.80575	7.79287	0.0182203	9.30717e+06			3	6	85.1768
I19	BF042	SYBR	7.69153	9.17084	2.09205	1.0032e+07	5.73493e+06	6.07699e+06	3	6	85.0426		Questionable curves
J19	BF042	SYBR	10.6501	9.17084	2.09205	1.43784e+06			3	6	84.9083		Questionable curves
K19	BF043	SYBR	8.22171	8.28788	0.0935889	7.08277e+06	6.788e+06	416868	3	5	85.311
L19	BF043	SYBR	8.35406	8.28788	0.0935889	6.49323e+06			3	5	85.1768
M19	BF044	SYBR	6.76408	6.92652	0.229722	1.84443e+07	1.66727e+07	2.50537e+06	3	5	82.8948
N19	BF044	SYBR	7.08896	6.92652	0.229722	1.49011e+07			3	5	82.7606
O19	BF045	SYBR	8.08374	8.08034	0.00480002	7.75438e+06	7.7717e+06	24493.3	3	6	82.6263
P19	BF045	SYBR	8.07695	8.08034	0.00480002	7.78902e+06			3	6	82.6263
A20	BF046	SYBR	7.78222	7.74691	0.04994	9.45209e+06	9.67642e+06	317241	3	6	82.6263
B20	BF046	SYBR	7.71159	7.74691	0.04994	9.90074e+06			3	6	82.6263
C20	BF047	SYBR	8.49879	8.16473	0.472433	5.90459e+06	7.53035e+06	2.29918e+06	3	6	83.8344
D20	BF047	SYBR	7.83067	8.16473	0.472433	9.15612e+06			3	6	83.7002
E20	BF048	SYBR	11.7907	11.4043	0.54643	679932	904640	317786	3	9	84.2372
F20	BF048	SYBR	11.0179	11.4043	0.54643	1.12935e+06			3	8	84.2372
G20	BF049	SYBR	15.7863	16.5348	1.05849	49325.2	33892	21825.9	3	13	84.2372
H20	BF049	SYBR	17.2833	16.5348	1.05849	18458.7			3	13	84.1029
I20	BF050	SYBR	11.4695	11.2794	0.268799	839586	958603	168316	3	8	84.2372
J20	BF050	SYBR	11.0893	11.2794	0.268799	1.07762e+06			3	7	84.2372
K20	BF051	SYBR	7.97135	8.0588	0.123669	8.34825e+06	7.8954e+06	640419	3	5	83.4317
L20	BF051	SYBR	8.14624	8.0588	0.123669	7.44256e+06			3	5	83.2975
M20	BF052	SYBR	9.60018	9.59717	0.00426189	2.86496e+06	2.87064e+06	8033.49	3	6	82.2236
N20	BF052	SYBR	9.59415	9.59717	0.00426189	2.87632e+06			3	6	82.2236
O20	BF053	SYBR	8.97838	8.85444	0.175272	4.30954e+06	4.69039e+06	538601	3	6	85.1768
P20	BF053	SYBR	8.73051	8.85444	0.175272	5.07124e+06			3	6	85.1768
A21	BF054	SYBR	8.75214	8.70662	0.064364	4.99972e+06	5.15369e+06	217738	3	6	82.8948	84.9083
B21	BF054	SYBR	8.66111	8.70662	0.064364	5.30765e+06			3	6	82.8948	85.0426
C21	BF055	SYBR	10.907	11.1488	0.341948	1.21468e+06	1.04945e+06	233667	3	7	83.8344
D21	BF055	SYBR	11.3906	11.1488	0.341948	884220			3	9	83.9687
E21	BF056	SYBR	8.50649	8.47985	0.0376671	5.87483e+06	5.97939e+06	147872	3	6	83.9687
F21	BF056	SYBR	8.45322	8.47985	0.0376671	6.08395e+06			3	6	84.1029
G21	BF057	SYBR	8.76596	8.7615	0.00630989	4.95455e+06	4.96911e+06	20588.6	3	6	84.1029
H21	BF057	SYBR	8.75704	8.7615	0.00630989	4.98366e+06			3	6	84.1029
I21	BF058	SYBR	8.76386	8.69104	0.10299	4.96137e+06	5.21032e+06	352071	3	6	84.1029
J21	BF058	SYBR	8.61822	8.69104	0.10299	5.45927e+06			3	6	84.1029
K21	BF059	SYBR	8.62876	8.53679	0.130067	5.4216e+06	5.7696e+06	492141	3	6	84.2372
L21	BF059	SYBR	8.44482	8.53679	0.130067	6.1176e+06			3	6	84.2372
M21	BF060	SYBR	9.42336	10.3414	1.29836	3.21765e+06	2.09067e+06	1.59379e+06	3	6	84.1029		Questionable curves
N21	BF060	SYBR	11.2595	10.3414	1.29836	963695			3	7	83.9687		Questionable curves
O21	BF061	SYBR	11.3798	11.3718	0.011267	890513	895196	6622.6	3	7	84.2372
P21	BF061	SYBR	11.3639	11.3718	0.011267	899878			3	8	84.3714
A22	BF062	SYBR	9.39806	9.26764	0.184441	3.27155e+06	3.57713e+06	432154	3	6	84.2372
B22	BF062	SYBR	9.13722	9.26764	0.184441	3.88271e+06			3	6	84.2372
C22	BF063	SYBR	8.85964	8.78174	0.110173	4.65896e+06	4.90989e+06	354874	3	6	84.2372
D22	BF063	SYBR	8.70384	8.78174	0.110173	5.16083e+06			3	6	84.1029
E22	BF064	SYBR	9.51086	9.54587	0.0495134	3.038e+06	2.96975e+06	96531.7	3	6	85.0426
F22	BF064	SYBR	9.58088	9.54587	0.0495134	2.90149e+06			3	6	85.0426
G22	BF065	SYBR	7.93761	7.95222	0.0206557	8.53524e+06	8.45417e+06	114657	3	6	85.1768
H22	BF065	SYBR	7.96682	7.95222	0.0206557	8.37309e+06			3	6	85.1768
I22	BF066	SYBR	8.78387	8.6774	0.150571	4.89663e+06	5.26403e+06	519585	3	6	85.311
J22	BF066	SYBR	8.57093	8.6774	0.150571	5.63143e+06			3	6	85.1768
K22	BF067	SYBR	8.79459	8.79541	0.00116258	4.86228e+06	4.85965e+06	3709.34	3	6	83.8344
L22	BF067	SYBR	8.79623	8.79541	0.00116258	4.85703e+06			3	6	83.566
M22	BF068	SYBR	8.50051	8.37878	0.17215	5.89794e+06	6.40912e+06	722913	3	6	83.9687
N22	BF068	SYBR	8.25705	8.37878	0.17215	6.9203e+06			3	6	84.1029
O22	BF069	SYBR	9.43177	9.66092	0.324063	3.19993e+06	2.78416e+06	587989	3	6	85.1768
P22	BF069	SYBR	9.89007	9.66092	0.324063	2.36839e+06			3	7	85.0426
A23	BF070	SYBR	10.9	10.2677	0.894215	1.22026e+06	2.00984e+06	1.11664e+06	3	7	83.4317
B23	BF070	SYBR	9.63542	10.2677	0.894215	2.79942e+06			3	7	83.4317
C23	BF071	SYBR	8.46997	8.7183	0.351193	6.01741e+06	5.18016e+06	1.18405e+06	3	6	84.9083
D23	BF071	SYBR	8.96663	8.7183	0.351193	4.34291e+06			3	6	85.0426
E23	BF072	SYBR	8.68896	8.73403	0.0637422	5.21148e+06	5.06172e+06	211789	3	6	83.1633
F23	BF072	SYBR	8.77911	8.73403	0.0637422	4.91197e+06			3	6	83.1633
G23	BF073	SYBR	8.85391	8.91459	0.0858036	4.67652e+06	4.49745e+06	253249	3	6	83.566
H23	BF073	SYBR	8.97526	8.91459	0.0858036	4.31837e+06			3	6	83.566
I23	BF074	SYBR	8.84503	8.91246	0.095353	4.70388e+06	4.50458e+06	281844	3	6	85.311
J23	BF074	SYBR	8.97988	8.91246	0.095353	4.30529e+06			3	6	85.311
K23	BF075	SYBR	8.26528	8.23843	0.0379632	6.88301e+06	7.00649e+06	174631	3	6	85.311
L23	BF075	SYBR	8.21159	8.23843	0.0379632	7.12997e+06			3	6	85.311
M23	BF076	SYBR	10.0238	9.74635	0.392404	2.16926e+06	2.64608e+06	674331	3	7	84.1029
N23	BF076	SYBR	9.46888	9.74635	0.392404	3.12291e+06			3	6	84.1029
O23	BF077	SYBR	8.39772	8.29153	0.150169	6.30975e+06	6.78183e+06	667616	3	6	83.9687
P23	BF077	SYBR	8.18535	8.29153	0.150169	7.2539e+06			3	6	83.9687
A24	BF078	SYBR	8.09132	8.0981	0.0095933	7.71586e+06	7.68164e+06	48386.6	3	6	84.1029
B24	BF078	SYBR	8.10489	8.0981	0.0095933	7.64743e+06			3	6	84.1029
C24	BF079	SYBR	8.8857	8.89262	0.0097747	4.57992e+06	4.55922e+06	29261.4	3	6	84.1029
D24	BF079	SYBR	8.89953	8.89262	0.0097747	4.53853e+06			3	6	84.1029
E24	BF080	SYBR	9.47245	9.31409	0.223956	3.1156e+06	3.47571e+06	509271	3	6	83.4317
F24	BF080	SYBR	9.15573	9.31409	0.223956	3.83582e+06			3	6	83.4317
G24	BF081	SYBR	7.62158	7.36092	0.368634	1.05035e+07	1.26472e+07	3.03168e+06	3	6	83.8344
H24	BF081	SYBR	7.10026	7.36092	0.368634	1.47909e+07			3	6	83.7002
I24	BF082	SYBR	7.66884	7.99273	0.458041	1.01826e+07	8.41873e+06	2.49446e+06	3	6	83.9687
J24	BF082	SYBR	8.31661	7.99273	0.458041	6.65488e+06			3	6	83.9687
K24	BF083	SYBR	8.03601	8.18707	0.213637	8.00125e+06	7.28137e+06	1.01806e+06	3	6	85.311
L24	BF083	SYBR	8.33813	8.18707	0.213637	6.56149e+06			3	6	85.7137
M24	BF084	SYBR	8.97488	8.97488		4.31946e+06	#VALUE!	#VALUE!	3	6	84.3714
N24	BF084	SYBR	Undetermined	8.97488		#VALUE!			3	27	64.2361	83.029
O24	BF085	SYBR	8.57374	8.93231	0.507096	5.62106e+06	4.56557e+06	1.49268e+06	3	6	84.7741
P24	BF085	SYBR	9.29088	8.93231	0.507096	3.51009e+06			3	6	84.9083
M12	NTC	SYBR	36.835			0.0490725	#VALUE!	#VALUE!	3	33	76.4515	63.2964
N12	NTC	SYBR	Undetermined			#VALUE!			3	35	81.284	74.5722
O12	NTC	SYBR	Undetermined			#VALUE!	#VALUE!	#VALUE!	3	35	74.8407	61.1486
P12	NTC	SYBR	37.9342						3	34	74.8407

## Sheet: Universal_P4
Block Type	384-Well Block
Calibration Background is expired	Yes
Calibration Background performed on	2015-09-28 10:38:58 AM NZDT
Calibration FAM is expired	Yes
Calibration FAM performed on	2015-09-28 12:44:37 PM NZDT
Calibration NED is expired	Yes
Calibration NED performed on	2015-09-28 12:27:45 PM NZDT
Calibration ROI is expired	Yes
Calibration ROI performed on	2015-09-28 10:31:42 AM NZDT
Calibration ROX is expired	Yes
Calibration ROX performed on	2015-09-28 11:50:26 AM NZDT
Calibration SYBR is expired	Yes
Calibration SYBR performed on	2015-09-28 11:35:56 AM NZDT
Calibration TAMRA is expired	Yes
Calibration TAMRA performed on	2015-09-28 12:05:53 PM NZDT
Calibration Uniformity is expired	Yes
Calibration Uniformity performed on	2015-09-28 11:17:29 AM NZDT
Calibration VIC is expired	Yes
Calibration VIC performed on	2015-09-28 12:36:53 PM NZDT
Chemistry	SYBR_GREEN
Experiment File Name	E:\Taq sialidase - Kinase comparisons\08-Ali babies 384 p4 sybr.eds
Experiment Name	Ali babies 384 plate4
Experiment Run Start Time	2016-06-29 02:35:39 AM NZST
Experiment Run Stop Time	2016-06-29 03:47:05 AM NZST
Experiment Type	Standard Curve
Instrument Name	ViiA7
Instrument Serial Number	278880388
Instrument Type	ViiA(TM) 7 System
Passive Reference	ROX
Quantification Cycle Method	Ct
Signal Smoothing On	true
Stage/ Cycle where Analysis is performed	Stage 2, Step 2
Well Position	Sample Name	Task	Reporter	CT	Ct Mean	Ct SD	Quant by formula	Av. Q/formula	SD Q/formula	Baseline Start	Baseline End
G11	AB01	UNKNOWN	SYBR	9.67787	9.69765	0.0279666	2.72247e+06	2.68757e+06	49348.2	3	6
H11	AB01	UNKNOWN	SYBR	9.71742	9.69765	0.0279666	2.65268e+06			3	6
I11	AB02	UNKNOWN	SYBR	10.615	10.8065	0.270838	1.47138e+06	1.30779e+06	231351	3	7
J11	AB02	UNKNOWN	SYBR	10.998	10.8065	0.270838	1.1442e+06			3	7
K11	AB03	UNKNOWN	SYBR	9.40757	9.42646	0.0267076	3.25118e+06	3.21136e+06	56312.4	3	6
L11	AB03	UNKNOWN	SYBR	9.44534	9.42646	0.0267076	3.17154e+06			3	6
M11	AB04	UNKNOWN	SYBR	12.6009	12.4628	0.195312	399421	439134	56162	3	9
N11	AB04	UNKNOWN	SYBR	12.3247	12.4628	0.195312	478846			3	9
O11	AB05	UNKNOWN	SYBR	8.27479	8.43678	0.229085	6.84015e+06	6.18479e+06	926812	3	5
P11	AB05	UNKNOWN	SYBR	8.59877	8.43678	0.229085	5.52944e+06			3	5
A1	AB06	UNKNOWN	SYBR	8.45102	8.35081	0.141711	6.09275e+06	6.52119e+06	605908	3	5
B1	AB06	UNKNOWN	SYBR	8.25061	8.35081	0.141711	6.94964e+06			3	5
C1	AB07	UNKNOWN	SYBR	12.6309	12.581	0.0704756	391641	404884	18729.1	3	8
D1	AB07	UNKNOWN	SYBR	12.5312	12.581	0.0704756	418128			3	8
E1	AB08	UNKNOWN	SYBR	9.48651	9.37076	0.163702	3.08697e+06	3.34036e+06	358359	3	6
F1	AB08	UNKNOWN	SYBR	9.255	9.37076	0.163702	3.59376e+06			3	5
G1	AB09	UNKNOWN	SYBR	9.37986	9.48433	0.147735	3.31088e+06	3.09867e+06	300112	3	6
H1	AB09	UNKNOWN	SYBR	9.58879	9.48433	0.147735	2.88646e+06			3	6
I1	AB10	UNKNOWN	SYBR	7.88541	7.75537	0.183899	8.83287e+06	9.65526e+06	1.16304e+06	3	5
J1	AB10	UNKNOWN	SYBR	7.62534	7.75537	0.183899	1.04777e+07			3	5
K1	AB11	UNKNOWN	SYBR	14.5051	14.3896	0.163403	114400	123773	13254.3	3	10
L1	AB11	UNKNOWN	SYBR	14.274	14.3896	0.163403	133145			3	10
M1	AB12	UNKNOWN	SYBR	11.7212	11.6632	0.0820083	711698	739855	39819.7	3	8
N1	AB12	UNKNOWN	SYBR	11.6052	11.6632	0.0820083	768012			3	8
O1	AB13	UNKNOWN	SYBR	7.74622	7.66647	0.112775	9.67818e+06	1.02124e+07	755522	3	6
P1	AB13	UNKNOWN	SYBR	7.58673	7.66647	0.112775	1.07467e+07			3	6
A2	AB14	UNKNOWN	SYBR	11.4494	11.2295	0.311052	850708	993148	201441	3	8
B2	AB14	UNKNOWN	SYBR	11.0096	11.2295	0.311052	1.13559e+06			3	7
C2	AB15	UNKNOWN	SYBR	7.97803	7.8939	0.118977	8.3117e+06	8.79717e+06	686546	3	5
D2	AB15	UNKNOWN	SYBR	7.80977	7.8939	0.118977	9.28263e+06			3	5
E2	AB16	UNKNOWN	SYBR	9.88187	9.79088	0.12868	2.38117e+06	2.53228e+06	213703	3	6
F2	AB16	UNKNOWN	SYBR	9.69989	9.79088	0.12868	2.68339e+06			3	6
G2	AB17	UNKNOWN	SYBR	8.00483	7.99695	0.0111433	8.16674e+06	8.20921e+06	60062.3	3	6
H2	AB17	UNKNOWN	SYBR	7.98907	7.99695	0.0111433	8.25168e+06			3	6
I2	AB18	UNKNOWN	SYBR	7.90245	8.10726	0.289639	8.73458e+06	7.70468e+06	1.45649e+06	3	5
J2	AB18	UNKNOWN	SYBR	8.31206	8.10726	0.289639	6.67479e+06			3	5
K2	AB19	UNKNOWN	SYBR	8.96082	8.65343	0.434714	4.35952e+06	5.44353e+06	1.53302e+06	3	6
L2	AB19	UNKNOWN	SYBR	8.34604	8.65343	0.434714	6.52754e+06			3	5
M2	AB20	UNKNOWN	SYBR	7.66052	7.64097	0.0276595	1.02384e+07	1.03715e+07	188351	3	5
N2	AB20	UNKNOWN	SYBR	7.62141	7.64097	0.0276595	1.05047e+07			3	5
O2	AB21	UNKNOWN	SYBR	6.66849	6.70218	0.0476543	1.9639e+07	1.9214e+07	601110	3	4
P2	AB21	UNKNOWN	SYBR	6.73588	6.70218	0.0476543	1.87889e+07			3	4
A3	AB22	UNKNOWN	SYBR	7.26048	7.26987	0.0132874	1.3314e+07	1.32323e+07	115446	3	5
B3	AB22	UNKNOWN	SYBR	7.27927	7.26987	0.0132874	1.31507e+07			3	5
C3	AB23	UNKNOWN	SYBR	9.28025	9.36954	0.126281	3.53467e+06	3.33912e+06	276552	3	6
D3	AB23	UNKNOWN	SYBR	9.45884	9.36954	0.126281	3.14357e+06			3	6
E3	AB24	UNKNOWN	SYBR	6.83411	6.77697	0.0808103	1.76153e+07	1.83017e+07	970644	3	5
F3	AB24	UNKNOWN	SYBR	6.71983	6.77697	0.0808103	1.8988e+07			3	5
G3	AB25	UNKNOWN	SYBR	9.08223	9.16636	0.118977	4.02546e+06	3.81494e+06	297724	3	6
H3	AB25	UNKNOWN	SYBR	9.25049	9.16636	0.118977	3.60441e+06			3	6
I3	AB26	UNKNOWN	SYBR	14.7369	14.8324	0.135006	98246.8	92458.9	8185.37	3	10
J3	AB26	UNKNOWN	SYBR	14.9279	14.8324	0.135006	86671			3	11
K3	AB27	UNKNOWN	SYBR	12.8683	12.7657	0.1451	335100	359266	34176.9	3	9
L3	AB27	UNKNOWN	SYBR	12.6631	12.7657	0.1451	383433			3	9
M3	AB28	UNKNOWN	SYBR	7.84119	7.86052	0.0273425	9.0931e+06	8.97912e+06	161195	3	5
N3	AB28	UNKNOWN	SYBR	7.87986	7.86052	0.0273425	8.86514e+06			3	5
O3	AB29	UNKNOWN	SYBR	9.66173	9.66589	0.00589516	2.75148e+06	2.74397e+06	10621.3	3	6
P3	AB29	UNKNOWN	SYBR	9.67006	9.66589	0.00589516	2.73646e+06			3	6
A4	AB30	UNKNOWN	SYBR	12.2654	12.181	0.119323	497869	527037	41250.1	3	8
B4	AB30	UNKNOWN	SYBR	12.0966	12.181	0.119323	556205			3	8
C4	AB31	UNKNOWN	SYBR	9.83294	9.65883	0.246226	2.45892e+06	2.77476e+06	446660	3	6
D4	AB31	UNKNOWN	SYBR	9.48472	9.65883	0.246226	3.09059e+06			3	6
E4	AB32	UNKNOWN	SYBR	14.0844	13.9616	0.173753	150796	163997	18669.5	3	10
F4	AB32	UNKNOWN	SYBR	13.8387	13.9616	0.173753	177199			3	10
G4	AB33	UNKNOWN	SYBR	11.4345	11.3112	0.17441	859087	934604	106796	3	8
H4	AB33	UNKNOWN	SYBR	11.1879	11.3112	0.17441	1.01012e+06			3	7
I4	AB34	UNKNOWN	SYBR	8.51467	8.48861	0.0368465	5.84336e+06	5.94505e+06	143816	3	6
J4	AB34	UNKNOWN	SYBR	8.46256	8.48861	0.0368465	6.04674e+06			3	6
K4	AB35	UNKNOWN	SYBR	11.1765	11.075	0.143485	1.0177e+06	1.09022e+06	102562	3	7
L4	AB35	UNKNOWN	SYBR	10.9736	11.075	0.143485	1.16275e+06			3	7
M4	AB36	UNKNOWN	SYBR	9.84004	9.79907	0.0579388	2.44748e+06	2.51512e+06	95659.3	3	6
N4	AB36	UNKNOWN	SYBR	9.7581	9.79907	0.0579388	2.58277e+06			3	6
O4	AB37	UNKNOWN	SYBR	8.28132	8.2873	0.00846646	6.8109e+06	6.78423e+06	37713	3	5
P4	AB37	UNKNOWN	SYBR	8.29329	8.2873	0.00846646	6.75757e+06			3	5
A5	AB38	UNKNOWN	SYBR	14.4221	14.4433	0.0300558	120812	119149	2351.22	3	10
B5	AB38	UNKNOWN	SYBR	14.4646	14.4433	0.0300558	117487			3	10
C5	AB39	UNKNOWN	SYBR	8.37395	8.35224	0.0307045	6.40897e+06	6.50165e+06	131070	3	6
D5	AB39	UNKNOWN	SYBR	8.33053	8.35224	0.0307045	6.59434e+06			3	6
E5	AB40	UNKNOWN	SYBR	7.41362	7.32506	0.125251	1.20403e+07	1.27828e+07	1.05009e+06	3	5
F5	AB40	UNKNOWN	SYBR	7.23649	7.32506	0.125251	1.35253e+07			3	5
G5	AB41	UNKNOWN	SYBR	9.17871	9.06276	0.16398	3.77836e+06	4.08907e+06	439421	3	6
H5	AB41	UNKNOWN	SYBR	8.94681	9.06276	0.16398	4.39979e+06			3	6
I5	AB42	UNKNOWN	SYBR	7.18883	7.31162	0.173642	1.39553e+07	1.29162e+07	1.46945e+06	3	5
J5	AB42	UNKNOWN	SYBR	7.4344	7.31162	0.173642	1.18771e+07			3	5
K5	AB43	UNKNOWN	SYBR	6.67963	6.99378	0.444282	1.94959e+07	1.62007e+07	4.66013e+06	3	5
L5	AB43	UNKNOWN	SYBR	7.30793	6.99378	0.444282	1.29055e+07			3	5
M5	AB44	UNKNOWN	SYBR	10.7891	10.8101	0.0296147	1.31244e+06	1.29464e+06	25172.6	3	7
N5	AB44	UNKNOWN	SYBR	10.831	10.8101	0.0296147	1.27684e+06			3	7
O5	AB45	UNKNOWN	SYBR	8.11672	8.11433	0.00338658	7.58823e+06	7.60018e+06	16898.9	3	5
P5	AB45	UNKNOWN	SYBR	8.11193	8.11433	0.00338658	7.61213e+06			3	5
A6	AB46	UNKNOWN	SYBR	7.23116	7.22066	0.0148478	1.35728e+07	1.3667e+07	133240	2	5
B6	AB46	UNKNOWN	SYBR	7.21016	7.22066	0.0148478	1.37612e+07			2	5
C6	AB47	UNKNOWN	SYBR	8.18475	8.14045	0.0626585	7.25673e+06	7.4741e+06	307411	3	6
D6	AB47	UNKNOWN	SYBR	8.09614	8.14045	0.0626585	7.69148e+06			3	6
E6	AB48	UNKNOWN	SYBR	8.84761	8.8342	0.0189661	4.69592e+06	4.73764e+06	58998.3	3	6
F6	AB48	UNKNOWN	SYBR	8.82079	8.8342	0.0189661	4.77936e+06			3	6
G6	AB49	UNKNOWN	SYBR	8.2062	8.3653	0.224997	7.15525e+06	6.4807e+06	953956	3	5
H6	AB49	UNKNOWN	SYBR	8.5244	8.3653	0.224997	5.80616e+06			3	5
I6	AB50	UNKNOWN	SYBR	10.2541	10.3363	0.116172	1.86483e+06	1.76948e+06	134844	3	6
J6	AB50	UNKNOWN	SYBR	10.4184	10.3363	0.116172	1.67413e+06			3	7
K6	AB51	UNKNOWN	SYBR	7.98653	7.98328	0.00458355	8.26547e+06	8.2831e+06	24928.6	3	6
L6	AB51	UNKNOWN	SYBR	7.98004	7.98328	0.00458355	8.30073e+06			3	6
M6	AB52	UNKNOWN	SYBR	7.51506	7.58911	0.104724	1.07299e+07	1.04753e+07	360079	3	5
N6	AB52	UNKNOWN	SYBR	7.66316	7.58911	0.104724	1.02206e+07			3	5
O6	AB53	UNKNOWN	SYBR	11.2552	10.959	0.418766	966463	1.19614e+06	324813	3	7
P6	AB53	UNKNOWN	SYBR	10.6629	10.959	0.418766	1.42582e+06			3	7
A7	AB54	UNKNOWN	SYBR	6.87999	6.85266	0.0386507	1.70926e+07	1.74049e+07	441658	3	5
B7	AB54	UNKNOWN	SYBR	6.82533	6.85266	0.0386507	1.77172e+07			3	5
C7	AB55	UNKNOWN	SYBR	9.26081	9.27773	0.0239172	3.58007e+06	3.54075e+06	55602.2	3	6
D7	AB55	UNKNOWN	SYBR	9.29464	9.27773	0.0239172	3.50143e+06			3	6
E7	AB56	UNKNOWN	SYBR	9.88858	10.0489	0.226739	2.37071e+06	2.14566e+06	318268	3	6
F7	AB56	UNKNOWN	SYBR	10.2092	10.0489	0.226739	1.92061e+06			3	6
G7	AB57	UNKNOWN	SYBR	6.84346	6.92441	0.114481	1.75076e+07	1.66247e+07	1.24849e+06	3	5
H7	AB57	UNKNOWN	SYBR	7.00536	6.92441	0.114481	1.57419e+07			3	5
I7	AB58	UNKNOWN	SYBR	7.34445	7.22861	0.163824	1.25998e+07	1.36349e+07	1.46385e+06	3	5
J7	AB58	UNKNOWN	SYBR	7.11277	7.22861	0.163824	1.467e+07			3	5
K7	AB59	UNKNOWN	SYBR	7.24153	7.32357	0.116013	1.34806e+07	1.27923e+07	973503	3	5
L7	AB59	UNKNOWN	SYBR	7.4056	7.32357	0.116013	1.21039e+07			3	5
M7	AB60	UNKNOWN	SYBR	9.21019	9.01447	0.276782	3.70107e+06	4.2434e+06	766964	3	6
N7	AB60	UNKNOWN	SYBR	8.81876	9.01447	0.276782	4.78572e+06			3	6
O7	AB61	UNKNOWN	SYBR	14.6377	14.6638	0.0368094	104860	103098	2491.54	3	11
P7	AB61	UNKNOWN	SYBR	14.6898	14.6638	0.0368094	101336			3	11
A8	AB62	UNKNOWN	SYBR	11.8738	11.8362	0.0531826	643815	660112	23046.6	3	8
B8	AB62	UNKNOWN	SYBR	11.7986	11.8362	0.0531826	676408			3	8
C8	AB63	UNKNOWN	SYBR	13.4807	13.4891	0.0118288	224155	222931	1731.41	3	9
D8	AB63	UNKNOWN	SYBR	13.4974	13.4891	0.0118288	221707			3	10
E8	AB64	UNKNOWN	SYBR	11.0292	11.0561	0.0379854	1.12102e+06	1.1016e+06	27472.9	3	7
F8	AB64	UNKNOWN	SYBR	11.0829	11.0561	0.0379854	1.08217e+06			3	7
G8	AB65	UNKNOWN	SYBR	13.2573	13.1961	0.086577	259569	270434	15365	3	9
H8	AB65	UNKNOWN	SYBR	13.1349	13.1961	0.086577	281298			3	9
I8	AB66	UNKNOWN	SYBR	9.63493	9.63343	0.00212353	2.80032e+06	2.80308e+06	3908.24	3	6
J8	AB66	UNKNOWN	SYBR	9.63193	9.63343	0.00212353	2.80585e+06			3	6
K8	AB67	UNKNOWN	SYBR	10.0805	10.1064	0.0365781	2.08998e+06	2.05508e+06	49353.2	3	6
L8	AB67	UNKNOWN	SYBR	10.1323	10.1064	0.0365781	2.02018e+06			3	6
M8	AB68	UNKNOWN	SYBR	11.6561	11.7503	0.133305	742770	699530	61150.7	3	8
N8	AB68	UNKNOWN	SYBR	11.8446	11.7503	0.133305	656290			3	8
O8	AB69	UNKNOWN	SYBR	9.91959	9.91959	0	2.32292e+06	1.24966e+06	1.51781e+06	3	6
P8	AB69	UNKNOWN	SYBR	13.8455	11.8826	2.77605	176407			3	10
A12	B.Long 15707-1	STANDARD	SYBR	8.15399	8.01682	0.193981	7.40483e+06	8.13557e+06	1.03343e+06	3	5
B12	B.Long 15707-1	STANDARD	SYBR	7.87965	8.01682	0.193981	8.86632e+06			3	5
C12	B.Long 15707-2	STANDARD	SYBR	12.653	12.6947	0.0589638	385980	375697	14542	3	8
D12	B.Long 15707-2	STANDARD	SYBR	12.7364	12.6947	0.0589638	365414			3	9
E12	B.Long 15707-3	STANDARD	SYBR	16.1977	16.2356	0.053631	37650.3	36735.8	1293.35	3	11
F12	B.Long 15707-3	STANDARD	SYBR	16.2735	16.2356	0.053631	35821.2			3	12
G12	B.Long 15707-4	STANDARD	SYBR	21.1212	20.6659	0.64394	1485.14	2092.85	859.433	3	17
H12	B.Long 15707-4	STANDARD	SYBR	20.2106	20.6659	0.64394	2700.56			3	16
I12	B.Long 15707-5	STANDARD	SYBR	26.219	25.8105	0.5778	52.2493	70.7997	26.2341	3	22
J12	B.Long 15707-5	STANDARD	SYBR	25.4019	25.8105	0.5778	89.35			3	21
K12	B.Long 15707-6	STANDARD	SYBR	28.8259	28.9645	0.196067	9.43423	8.64905	1.1104	3	25
L12	B.Long 15707-6	STANDARD	SYBR	29.1032	28.9645	0.196067	7.86388			3	25
A9	BF086	UNKNOWN	SYBR	19.3159	14.0283	7.47782	4859.27	2.52114e+06	3.55856e+06	3	8
B9	BF086	UNKNOWN	SYBR	8.7407	8.7407	0	5.03742e+06			3	6
C9	BF087	UNKNOWN	SYBR	14.8038	12.1611	3.73725	94027.9	1.5584e+06	2.07093e+06	3	11
D9	BF087	UNKNOWN	SYBR	9.51852	9.51852	0	3.02277e+06			3	6
E9	BF088	UNKNOWN	SYBR	14.6444	11.5283	4.40688	104402	3.17738e+06	4.34584e+06	3	10
F9	BF088	UNKNOWN	SYBR	8.41212	8.41212	0	6.25035e+06			3	6
G9	BF089	UNKNOWN	SYBR	Undetermined	7.5473		#VALUE!	#VALUE!	#VALUE!	3	39
H9	BF089	UNKNOWN	SYBR	7.5473	7.5473		1.10286e+07			3	6
I9	BF090	UNKNOWN	SYBR	9.88088	9.23836	0.908663	2.38271e+06	3.96139e+06	2.23259e+06	3	6
J9	BF090	UNKNOWN	SYBR	8.59584	8.59584	0	5.54007e+06			3	6
K9	BF091	UNKNOWN	SYBR	28.5365	21.3368	10.1819	11.4086	72839.7	102995	3	21
L9	BF091	UNKNOWN	SYBR	14.1371	14.1371	0	145668			3	10
M9	BF092	UNKNOWN	SYBR	24.3018	16.131	11.5553	183.993	4.20496e+06	5.94645e+06	3	17
N9	BF092	UNKNOWN	SYBR	7.96017	7.96017	0	8.40973e+06			3	6
O9	BF093	UNKNOWN	SYBR	10.8151	12.1005	1.81776	1.29021e+06	764386	743628	3	7	Questionable curves
P9	BF093	UNKNOWN	SYBR	13.3858	12.1005	1.81776	238562			3	7
A10	BF094	UNKNOWN	SYBR	8.04076	8.08401	0.0611588	7.97632e+06	7.75614e+06	311383	3	6
B10	BF094	UNKNOWN	SYBR	8.12725	8.08401	0.0611588	7.53596e+06			3	6
C10	BF095	UNKNOWN	SYBR	8.97257	8.83045	0.200985	4.32601e+06	4.76982e+06	627642	3	6
D10	BF095	UNKNOWN	SYBR	8.68833	8.83045	0.200985	5.21363e+06			3	6
E10	BF096	UNKNOWN	SYBR	9.05947	8.92846	0.185284	4.08607e+06	4.46963e+06	542429	3	6
F10	BF096	UNKNOWN	SYBR	8.79744	8.92846	0.185284	4.85319e+06			3	6
G10	BF097	UNKNOWN	SYBR	10.0847	9.93654	0.209466	2.08432e+06	2.30808e+06	316449	3	7
H10	BF097	UNKNOWN	SYBR	9.78843	9.93654	0.209466	2.53184e+06			3	6
I10	BF098	UNKNOWN	SYBR	12.7636	13.0989	0.474211	358954	295027	90406.4	3	10
J10	BF098	UNKNOWN	SYBR	13.4342	13.0989	0.474211	231101			3	10
K10	BF099	UNKNOWN	SYBR	7.77157	8.8013	1.45627	9.51842e+06	5.99021e+06	4.98965e+06	3	6
L10	BF099	UNKNOWN	SYBR	9.83104	9.83104	0	2.46199e+06			3	6
M10	BF100	UNKNOWN	SYBR	9.84554	9.88169	0.0511319	2.43866e+06	2.38212e+06	79961.7	3	6
N10	BF100	UNKNOWN	SYBR	9.91785	9.88169	0.0511319	2.32558e+06			3	6
O10	BF101	UNKNOWN	SYBR	11.0922	11.0252	0.0948034	1.0756e+06	1.12509e+06	69989.7	3	7
P10	BF101	UNKNOWN	SYBR	10.9581	11.0252	0.0948034	1.17458e+06			3	7
A11	BF102	UNKNOWN	SYBR	8.46539	8.53465	0.0979466	6.03553e+06	5.77318e+06	371032	3	6
B11	BF102	UNKNOWN	SYBR	8.6039	8.53465	0.0979466	5.51082e+06			3	6
C11	BF103	UNKNOWN	SYBR	9.34625	9.32451	0.0307571	3.38475e+06	3.43379e+06	69341.4	3	6
D11	BF103	UNKNOWN	SYBR	9.30276	9.32451	0.0307571	3.48282e+06			3	6
E11	BF104	UNKNOWN	SYBR	7.15755	7.17612	0.0262663	1.42449e+07	1.40732e+07	242703	3	6
F11	BF104	UNKNOWN	SYBR	7.1947	7.17612	0.0262663	1.39016e+07			3	6
M12	NTC	NTC	SYBR	30.5002			3.14239	1.57857	2.21157	3	26
N12	NTC	NTC	SYBR	38.6649			0.0147576			3	34
O12	NTC	NTC	SYBR	35.5094			0.117173	#VALUE!	#VALUE!	3	31
P12	NTC	NTC	SYBR	Undetermined			#VALUE!			3	39

## Sheet: Longum_P1
Block Type	384-Well Block
Calibration Background is expired	Yes
Calibration Background performed on	2015-09-28 10:38:58 AM NZDT												28 10:38:58 AM NZDT
Calibration FAM is expired	Yes
Calibration FAM performed on	2015-09-28 12:44:37 PM NZDT												28 12:44:37 PM NZDT
Calibration NED is expired	Yes
Calibration NED performed on	2015-09-28 12:27:45 PM NZDT												28 12:27:45 PM NZDT
Calibration ROI is expired	Yes
Calibration ROI performed on	2015-09-28 10:31:42 AM NZDT												28 10:31:42 AM NZDT
Calibration ROX is expired	Yes
Calibration ROX performed on	2015-09-28 11:50:26 AM NZDT												28 11:50:26 AM NZDT
Calibration SYBR is expired	Yes
Calibration SYBR performed on	2015-09-28 11:35:56 AM NZDT												28 11:35:56 AM NZDT
Calibration TAMRA is expired	Yes
Calibration TAMRA performed on	2015-09-28 12:05:53 PM NZDT												28 12:05:53 PM NZDT
Calibration Uniformity is expired	Yes
Calibration Uniformity performed on	2015-09-28 11:17:29 AM NZDT
Calibration VIC is expired	Yes
Calibration VIC performed on	2015-09-28 12:36:53 PM NZDT
Chemistry	TAQMAN
Experiment File Name	E:\Taq sialidase - Kinase comparisons\09-Sing infant 384 P1 Taq Kinase.eds
Experiment Name	Sing infant 384 P1 kinase 2
Experiment Run Start Time	2016-07-26 21:35:22 PM NZST
Experiment Run Stop Time	2016-07-26 22:29:56 PM NZST
Experiment Type	Standard Curve
Instrument Name	ViiA7
Instrument Serial Number	278880388
Instrument Type	ViiA(TM) 7 System
Passive Reference	ROX
Quantification Cycle Method	Ct
Signal Smoothing On	true
Stage/ Cycle where Analysis is performed	Stage 2, Step 2
Well Position	Sample Name	Target Name	Task	Reporter	CT	Ct Mean	Ct SD	Quant by formula	Av. Q/formula	SD Q/formula	Baseline Start	Baseline End
A1	2-2	Kinase F/R + Probe	UNKNOWN	FAM	Undetermined			#VALUE!	#VALUE!	#VALUE!	3	39
B1	2-2	Kinase F/R + Probe	UNKNOWN	FAM	Undetermined			#VALUE!			3	39
C1	2-5	Kinase F/R + Probe	UNKNOWN	FAM	Undetermined	37.0445		#VALUE!	#VALUE!	#VALUE!	3	39
D1	2-5	Kinase F/R + Probe	UNKNOWN	FAM	37.0445	37.0445		8.47713			3	33
E1	2-7	Kinase F/R + Probe	UNKNOWN	FAM	Undetermined			#VALUE!	#VALUE!	#VALUE!	3	39
F1	2-7	Kinase F/R + Probe	UNKNOWN	FAM	Undetermined			#VALUE!			3	39
G1	3-1	Kinase F/R + Probe	UNKNOWN	FAM	Undetermined			#VALUE!	#VALUE!	#VALUE!	3	39
H1	3-1	Kinase F/R + Probe	UNKNOWN	FAM	Undetermined			#VALUE!			3	39
I1	3-5	Kinase F/R + Probe	UNKNOWN	FAM	23.2631	23.0379	0.318408	36388.8	42107.3	8087.29	3	20
J1	3-5	Kinase F/R + Probe	UNKNOWN	FAM	22.8128	23.0379	0.318408	47825.9			3	20
K1	3-7	Kinase F/R + Probe	UNKNOWN	FAM	16.9635	17.0468	0.117772	1.66535e+06	1.58529e+06	113223	3	14		0.403227
L1	3-7	Kinase F/R + Probe	UNKNOWN	FAM	17.13	17.0468	0.117772	1.50523e+06			3	14
M1	4-2	Kinase F/R + Probe	UNKNOWN	FAM	Undetermined			#VALUE!	#VALUE!	#VALUE!	3	39
N1	4-2	Kinase F/R + Probe	UNKNOWN	FAM	Undetermined			#VALUE!			3	39
O1	4-5	Kinase F/R + Probe	UNKNOWN	FAM	Undetermined			#VALUE!	#VALUE!	#VALUE!	3	39
P1	4-5	Kinase F/R + Probe	UNKNOWN	FAM	Undetermined			#VALUE!			3	39
A2	4-7	Kinase F/R + Probe	UNKNOWN	FAM	17.1121	17.1389	0.0379241	1.52169e+06	1.49733e+06	34462.6	3	14
B2	4-7	Kinase F/R + Probe	UNKNOWN	FAM	17.1657	17.1389	0.0379241	1.47296e+06			3	14
C2	7-2	Kinase F/R + Probe	UNKNOWN	FAM	Undetermined			#VALUE!	#VALUE!	#VALUE!	3	39
D2	7-2	Kinase F/R + Probe	UNKNOWN	FAM	Undetermined			#VALUE!			3	39
E2	7-5	Kinase F/R + Probe	UNKNOWN	FAM	20.5606	20.6357	0.106118	187636	179468	11551.2	3	17
F2	7-5	Kinase F/R + Probe	UNKNOWN	FAM	20.7107	20.6357	0.106118	171300			3	17
G2	7-7	Kinase F/R + Probe	UNKNOWN	FAM	21.3735	21.2916	0.115826	114566	120554	8468.06	3	18
H2	7-7	Kinase F/R + Probe	UNKNOWN	FAM	21.2097	21.2916	0.115826	126542			3	18
I2	10-1	Kinase F/R + Probe	UNKNOWN	FAM	33.6797	34.0654	0.54539	65.341	53.1277	17.2722	3	31
J2	10-1	Kinase F/R + Probe	UNKNOWN	FAM	34.451	34.0654	0.54539	40.9144			3	31
K2	10-5	Kinase F/R + Probe	UNKNOWN	FAM	Undetermined			#VALUE!	#VALUE!	#VALUE!	3	39
L2	10-5	Kinase F/R + Probe	UNKNOWN	FAM	Undetermined			#VALUE!			3	39
M2	10-7	Kinase F/R + Probe	UNKNOWN	FAM	19.0015	19.2386	0.335265	483383	422943	85475.3	3	16
N2	10-7	Kinase F/R + Probe	UNKNOWN	FAM	19.4756	19.2386	0.335265	362503			3	16
O2	11-1	Kinase F/R + Probe	UNKNOWN	FAM	18.4856	18.7296	0.345093	661111	576366	119847	3	15
P2	11-1	Kinase F/R + Probe	UNKNOWN	FAM	18.9737	18.7296	0.345093	491621			3	16
A3	11-5	Kinase F/R + Probe	UNKNOWN	FAM	19.4506	19.4818	0.0441011	368054	361218	9667.57	3	16
B3	11-5	Kinase F/R + Probe	UNKNOWN	FAM	19.513	19.4818	0.0441011	354382			3	16
C3	11-7	Kinase F/R + Probe	UNKNOWN	FAM	21.1626	21.5348	0.526366	130212	106544	33471	3	18
D3	11-7	Kinase F/R + Probe	UNKNOWN	FAM	21.9069	21.5348	0.526366	82876.4			3	19
E3	13-1	Kinase F/R + Probe	UNKNOWN	FAM	27.6425	27.4195	0.315358	2550.14	2946.52	560.566	3	24
F3	13-1	Kinase F/R + Probe	UNKNOWN	FAM	27.1965	27.4195	0.315358	3342.9			3	24
G3	13-5	Kinase F/R + Probe	UNKNOWN	FAM	Undetermined			#VALUE!	#VALUE!	#VALUE!	3	39
H3	13-5	Kinase F/R + Probe	UNKNOWN	FAM	Undetermined			#VALUE!			3	39
I3	13-7	Kinase F/R + Probe	UNKNOWN	FAM	Undetermined	35.0826		#VALUE!	#VALUE!	#VALUE!	3	32
J3	13-7	Kinase F/R + Probe	UNKNOWN	FAM	35.0826	35.0826		27.8872			3	32
K3	14-1	Kinase F/R + Probe	UNKNOWN	FAM	Undetermined			#VALUE!	#VALUE!	#VALUE!	3	39
L3	14-1	Kinase F/R + Probe	UNKNOWN	FAM	Undetermined			#VALUE!			3	39
M3	14-5	Kinase F/R + Probe	UNKNOWN	FAM	17.3448	17.3688	0.0339764	1.32127e+06	1.30228e+06	26853.7	3	14
N3	14-5	Kinase F/R + Probe	UNKNOWN	FAM	17.3928	17.3688	0.0339764	1.28329e+06			3	14
O3	14-7	Kinase F/R + Probe	UNKNOWN	FAM	20.0965	20.0699	0.0377353	248682	252775	5788.83	3	17
P3	14-7	Kinase F/R + Probe	UNKNOWN	FAM	20.0432	20.0699	0.0377353	256869			3	17
A4	16-1	Kinase F/R + Probe	UNKNOWN	FAM	Undetermined			#VALUE!	#VALUE!	#VALUE!	3	39
B4	16-1	Kinase F/R + Probe	UNKNOWN	FAM	Undetermined			#VALUE!			3	39
C4	16-5	Kinase F/R + Probe	UNKNOWN	FAM	18.377	18.2456	0.185843	706167	767231	86358.1	3	15
D4	16-5	Kinase F/R + Probe	UNKNOWN	FAM	18.1142	18.2456	0.185843	828296			3	15
E4	16-7	Kinase F/R + Probe	UNKNOWN	FAM	19.7386	19.5143	0.317197	309034	357389	68383.4	3	16
F4	16-7	Kinase F/R + Probe	UNKNOWN	FAM	19.29	19.5143	0.317197	405743			3	16
G4	19-1	Kinase F/R + Probe	UNKNOWN	FAM	Undetermined			#VALUE!	#VALUE!	#VALUE!	3	39
H4	19-1	Kinase F/R + Probe	UNKNOWN	FAM	Undetermined			#VALUE!			3	39
I4	19-5	Kinase F/R + Probe	UNKNOWN	FAM	Undetermined			#VALUE!	#VALUE!	#VALUE!	3	39
J4	19-5	Kinase F/R + Probe	UNKNOWN	FAM	Undetermined			#VALUE!			3	39
K4	19-7	Kinase F/R + Probe	UNKNOWN	FAM	Undetermined			#VALUE!	#VALUE!	#VALUE!	3	39
L4	19-7	Kinase F/R + Probe	UNKNOWN	FAM	Undetermined			#VALUE!			3	39
M4	25-1	Kinase F/R + Probe	UNKNOWN	FAM	35.6654	35.6654		19.5781	#VALUE!	#VALUE!	3	31
N4	25-1	Kinase F/R + Probe	UNKNOWN	FAM	Undetermined	35.6654		#VALUE!			3	39
O4	25-5	Kinase F/R + Probe	UNKNOWN	FAM	Undetermined			#VALUE!	#VALUE!	#VALUE!	3	39
P4	25-5	Kinase F/R + Probe	UNKNOWN	FAM	Undetermined			#VALUE!			3	39
A5	25-7	Kinase F/R + Probe	UNKNOWN	FAM	19.4327	19.6131	0.255115	372069	335484	51740.2	3	16
B5	25-7	Kinase F/R + Probe	UNKNOWN	FAM	19.7935	19.6131	0.255115	298898			3	17
C5	27-1	Kinase F/R + Probe	UNKNOWN	FAM	36.9341	37.047	0.15971	9.06464	8.48401	0.821127	3	32
D5	27-1	Kinase F/R + Probe	UNKNOWN	FAM	37.16	37.047	0.15971	7.90339			3	32
E5	27-5	Kinase F/R + Probe	UNKNOWN	FAM	Undetermined			#VALUE!	#VALUE!	#VALUE!	3	39
F5	27-5	Kinase F/R + Probe	UNKNOWN	FAM	Undetermined			#VALUE!			3	39
G5	27-7	Kinase F/R + Probe	UNKNOWN	FAM	32.8351	33.5075	0.950976	109.1	78.6654	43.0414	3	30
H5	27-7	Kinase F/R + Probe	UNKNOWN	FAM	34.18	33.5075	0.950976	48.2306			3	31
I5	32-2	Kinase F/R + Probe	UNKNOWN	FAM	Undetermined			#VALUE!	#VALUE!	#VALUE!	3	39
J5	32-2	Kinase F/R + Probe	UNKNOWN	FAM	Undetermined			#VALUE!			3	39
K5	32-5	Kinase F/R + Probe	UNKNOWN	FAM	Undetermined			#VALUE!	#VALUE!	#VALUE!	3	39
L5	32-5	Kinase F/R + Probe	UNKNOWN	FAM	Undetermined			#VALUE!			3	39
M5	32-7	Kinase F/R + Probe	UNKNOWN	FAM	19.6133	19.7034	0.127389	333439	316170	24421.5	3	16
N5	32-7	Kinase F/R + Probe	UNKNOWN	FAM	19.7935	19.7034	0.127389	298902			3	17
O5	40-1	Kinase F/R + Probe	UNKNOWN	FAM	38.357	38.357		3.82199	#VALUE!	#VALUE!	3	31
P5	40-1	Kinase F/R + Probe	UNKNOWN	FAM	Undetermined	38.357		#VALUE!			3	39
A6	40-5	Kinase F/R + Probe	UNKNOWN	FAM	22.0033	21.9122	0.128767	78169.4	82737.2	6459.75	3	19
B6	40-5	Kinase F/R + Probe	UNKNOWN	FAM	21.8212	21.9122	0.128767	87304.9			3	19
C6	40-7	Kinase F/R + Probe	UNKNOWN	FAM	17.207	17.3721	0.233529	1.43652e+06	1.30606e+06	184503	3	14
D6	40-7	Kinase F/R + Probe	UNKNOWN	FAM	17.5373	17.3721	0.233529	1.1756e+06			3	14
E6	43-1	Kinase F/R + Probe	UNKNOWN	FAM	33.915	35.1676	1.77153	56.6471	34.5145	31.3002	3	30
F6	43-1	Kinase F/R + Probe	UNKNOWN	FAM	36.4203	35.1676	1.77153	12.3819			3	33
G6	43-5	Kinase F/R + Probe	UNKNOWN	FAM	Undetermined	37.5346		#VALUE!	#VALUE!	#VALUE!	3	39
H6	43-5	Kinase F/R + Probe	UNKNOWN	FAM	37.5346	37.5346		6.29595			3	34
I6	43-7	Kinase F/R + Probe	UNKNOWN	FAM	34.5971	35.1855	0.832209	37.4436	27.8865	13.5158	3	31
J6	43-7	Kinase F/R + Probe	UNKNOWN	FAM	35.774	35.1855	0.832209	18.3293			3	33
K6	55-1	Kinase F/R + Probe	UNKNOWN	FAM	18.3859	19.6725	1.81953	702372	424850	392476	3	15
L6	55-1	Kinase F/R + Probe	UNKNOWN	FAM	20.9591	19.6725	1.81953	147327			3	18
M6	55-5	Kinase F/R + Probe	UNKNOWN	FAM	23.9883	23.9853	0.00421064	23431.2	23473.7	59.9929	3	21
N6	55-5	Kinase F/R + Probe	UNKNOWN	FAM	23.9824	23.9853	0.00421064	23516.1			3	21
O6	55-7	Kinase F/R + Probe	UNKNOWN	FAM	20.899	21.0543	0.219543	152796	139674	18556.9	3	17
P6	55-7	Kinase F/R + Probe	UNKNOWN	FAM	21.2095	21.0543	0.219543	126552			3	18
A7	59-1	Kinase F/R + Probe	UNKNOWN	FAM	Undetermined			#VALUE!	#VALUE!	#VALUE!	3	39
B7	59-1	Kinase F/R + Probe	UNKNOWN	FAM	Undetermined			#VALUE!			3	39
C7	59-5	Kinase F/R + Probe	UNKNOWN	FAM	20.9651	21.0204	0.0782205	146788	142022	6740.13	3	18
D7	59-5	Kinase F/R + Probe	UNKNOWN	FAM	21.0757	21.0204	0.0782205	137256			3	18
E7	59-7	Kinase F/R + Probe	UNKNOWN	FAM	17.5029	17.7503	0.349874	1.20037e+06	1.04467e+06	220189	3	15
F7	59-7	Kinase F/R + Probe	UNKNOWN	FAM	17.9977	17.7503	0.349874	888972			3	15
G7	70-1	Kinase F/R + Probe	UNKNOWN	FAM	Undetermined			#VALUE!	#VALUE!	#VALUE!	3	39
H7	70-1	Kinase F/R + Probe	UNKNOWN	FAM	Undetermined			#VALUE!			3	39
I7	70-5	Kinase F/R + Probe	UNKNOWN	FAM	20.294	20.2543	0.0561801	220597	226047	7706.29	3	17
J7	70-5	Kinase F/R + Probe	UNKNOWN	FAM	20.2145	20.2543	0.0561801	231496			3	17
K7	70-7	Kinase F/R + Probe	UNKNOWN	FAM	17.1948	17.1223	0.102573	1.44717e+06	1.51377e+06	94181.3	3	14
L7	70-7	Kinase F/R + Probe	UNKNOWN	FAM	17.0498	17.1223	0.102573	1.58037e+06			3	14
M7	73-1	Kinase F/R + Probe	UNKNOWN	FAM	28.7612	28.9964	0.332638	1293.23	1132.63	227.13	3	26
N7	73-1	Kinase F/R + Probe	UNKNOWN	FAM	29.2317	28.9964	0.332638	972.021			3	26
O7	73-5	Kinase F/R + Probe	UNKNOWN	FAM	20.7471	20.8492	0.144365	167559	157795	13808.7	3	17
P7	73-5	Kinase F/R + Probe	UNKNOWN	FAM	20.9512	20.8492	0.144365	148031			3	18
A8	73-7	Kinase F/R + Probe	UNKNOWN	FAM	18.7428	18.9427	0.282647	565568	504650	86151.5	3	15
B8	73-7	Kinase F/R + Probe	UNKNOWN	FAM	19.1425	18.9427	0.282647	443731			3	16
C8	74-2	Kinase F/R + Probe	UNKNOWN	FAM	34.6585	35.126	0.661046	36.0723	28.2625	11.0448	3	31
D8	74-2	Kinase F/R + Probe	UNKNOWN	FAM	35.5934	35.126	0.661046	20.4526			3	32
E8	74-5	Kinase F/R + Probe	UNKNOWN	FAM	Undetermined			#VALUE!	#VALUE!	#VALUE!	3	39
F8	74-5	Kinase F/R + Probe	UNKNOWN	FAM	Undetermined			#VALUE!			3	39
G8	74-7	Kinase F/R + Probe	UNKNOWN	FAM	18.0272	18.0567	0.0417557	873200	857829	21738	3	15
H8	74-7	Kinase F/R + Probe	UNKNOWN	FAM	18.0862	18.0567	0.0417557	842458			3	15
I8	87-1	Kinase F/R + Probe	UNKNOWN	FAM	29.5688	29.9341	0.516603	792.16	650.297	200.625	3	26
J8	87-1	Kinase F/R + Probe	UNKNOWN	FAM	30.2994	29.9341	0.516603	508.433			3	27
K8	87-5	Kinase F/R + Probe	UNKNOWN	FAM	28.1699	28.2249	0.0779049	1851.65	1791.77	84.6916	3	25
L8	87-5	Kinase F/R + Probe	UNKNOWN	FAM	28.28	28.2249	0.0779049	1731.88			3	25
M8	87-7	Kinase F/R + Probe	UNKNOWN	FAM	25.2496	25.1542	0.134851	10897.8	11566.4	945.631	3	22
N8	87-7	Kinase F/R + Probe	UNKNOWN	FAM	25.0588	25.1542	0.134851	12235.1			3	22
O8	92-1	Kinase F/R + Probe	UNKNOWN	FAM	20.4158	20.3831	0.0462321	204876	209023	5864.52	3	17
P8	92-1	Kinase F/R + Probe	UNKNOWN	FAM	20.3504	20.3831	0.0462321	213169			3	17
A9	92-5	Kinase F/R + Probe	UNKNOWN	FAM	20.9103	21.0072	0.136932	151751	143337	11899.2	3	18
B9	92-5	Kinase F/R + Probe	UNKNOWN	FAM	21.104	21.0072	0.136932	134923			3	18
C9	92-7	Kinase F/R + Probe	UNKNOWN	FAM	23.4859	23.3289	0.221974	31785.7	35121.5	4717.56	3	20
D9	92-7	Kinase F/R + Probe	UNKNOWN	FAM	23.172	23.3289	0.221974	38457.3			3	20
E9	100-1	Kinase F/R + Probe	UNKNOWN	FAM	31.958	32.1358	0.251456	185.788	167.754	25.5039	3	29
F9	100-1	Kinase F/R + Probe	UNKNOWN	FAM	32.3136	32.1358	0.251456	149.72			3	29
G9	100-5	Kinase F/R + Probe	UNKNOWN	FAM	Undetermined			#VALUE!	#VALUE!	#VALUE!	3	39
H9	100-5	Kinase F/R + Probe	UNKNOWN	FAM	Undetermined			#VALUE!			3	39
I9	100-7	Kinase F/R + Probe	UNKNOWN	FAM	Undetermined	35.3758		#VALUE!	#VALUE!	#VALUE!	3	32
J9	100-7	Kinase F/R + Probe	UNKNOWN	FAM	35.3758	35.3758		23.3403			3	32
K9	103-1	Kinase F/R + Probe	UNKNOWN	FAM	Undetermined	35.2604		#VALUE!	#VALUE!	#VALUE!	3	39
L9	103-1	Kinase F/R + Probe	UNKNOWN	FAM	35.2604	35.2604		25.0337			3	31
M9	103-5	Kinase F/R + Probe	UNKNOWN	FAM	Undetermined			#VALUE!	#VALUE!	#VALUE!	3	39
N9	103-5	Kinase F/R + Probe	UNKNOWN	FAM	Undetermined			#VALUE!			3	39
O9	103-7	Kinase F/R + Probe	UNKNOWN	FAM	Undetermined	33.2642		#VALUE!	#VALUE!	#VALUE!	3	31
P9	103-7	Kinase F/R + Probe	UNKNOWN	FAM	33.2642	33.2642		84.0843			3	30
A10	111-1	Kinase F/R + Probe	UNKNOWN	FAM	Undetermined			#VALUE!	#VALUE!	#VALUE!	3	39
B10	111-1	Kinase F/R + Probe	UNKNOWN	FAM	Undetermined			#VALUE!			3	39
C10	111-5	Kinase F/R + Probe	UNKNOWN	FAM	17.7227	17.7952	0.102492	1.05045e+06	1.00622e+06	62554.3	3	15
D10	111-5	Kinase F/R + Probe	UNKNOWN	FAM	17.8677	17.7952	0.102492	961988			3	15
E10	111-7	Kinase F/R + Probe	UNKNOWN	FAM	16.3099	16.3711	0.0866593	2.47625e+06	2.38749e+06	125519	3	13
F10	111-7	Kinase F/R + Probe	UNKNOWN	FAM	16.4324	16.3711	0.0866593	2.29874e+06			3	13
G10	116-1	Kinase F/R + Probe	UNKNOWN	FAM	32.1444	33.0002	1.2103	165.921	112.316	75.8083	3	29
H10	116-1	Kinase F/R + Probe	UNKNOWN	FAM	33.856	33.0002	1.2103	58.7119			3	31
I10	116-5	Kinase F/R + Probe	UNKNOWN	FAM	Undetermined			#VALUE!	#VALUE!	#VALUE!	3	39
J10	116-5	Kinase F/R + Probe	UNKNOWN	FAM	Undetermined			#VALUE!			3	39
K10	116-7	Kinase F/R + Probe	UNKNOWN	FAM	19.3811	19.4621	0.114559	383904	365927	25422.9	3	16
L10	116-7	Kinase F/R + Probe	UNKNOWN	FAM	19.5431	19.4621	0.114559	347950			3	16
M10	121-2	Kinase F/R + Probe	UNKNOWN	FAM	Undetermined			#VALUE!	#VALUE!	#VALUE!	3	39
N10	121-2	Kinase F/R + Probe	UNKNOWN	FAM	Undetermined			#VALUE!			3	39
O10	121-5	Kinase F/R + Probe	UNKNOWN	FAM	Undetermined			#VALUE!	#VALUE!	#VALUE!	3	39
P10	121-5	Kinase F/R + Probe	UNKNOWN	FAM	Undetermined			#VALUE!			3	39
A11	121-7	Kinase F/R + Probe	UNKNOWN	FAM	Undetermined			#VALUE!	#VALUE!	#VALUE!	3	39
B11	121-7	Kinase F/R + Probe	UNKNOWN	FAM	Undetermined			#VALUE!			3	39
C11	136-1	Kinase F/R + Probe	UNKNOWN	FAM	Undetermined			#VALUE!	#VALUE!	#VALUE!	3	39
D11	136-1	Kinase F/R + Probe	UNKNOWN	FAM	Undetermined			#VALUE!			3	39
E11	136-5	Kinase F/R + Probe	UNKNOWN	FAM	Undetermined			#VALUE!	#VALUE!	#VALUE!	3	39
F11	136-5	Kinase F/R + Probe	UNKNOWN	FAM	Undetermined			#VALUE!			3	39
G11	136-7	Kinase F/R + Probe	UNKNOWN	FAM	Undetermined			#VALUE!	#VALUE!	#VALUE!	3	39
H11	136-7	Kinase F/R + Probe	UNKNOWN	FAM	Undetermined			#VALUE!			3	39
I11	140-1	Kinase F/R + Probe	UNKNOWN	FAM	32.8442	33.01	0.234469	108.5	98.6106	13.9862	3	30
J11	140-1	Kinase F/R + Probe	UNKNOWN	FAM	33.1758	33.01	0.234469	88.7209			3	30
K11	140-5	Kinase F/R + Probe	UNKNOWN	FAM	24.5155	24.6746	0.225033	17015.2	15520.8	2113.32	3	21
L11	140-5	Kinase F/R + Probe	UNKNOWN	FAM	24.8337	24.6746	0.225033	14026.5			3	21
M11	140-7	Kinase F/R + Probe	UNKNOWN	FAM	21.9458	21.7983	0.208595	80944.6	88880.4	11222.9	3	19
N11	140-7	Kinase F/R + Probe	UNKNOWN	FAM	21.6508	21.7983	0.208595	96816.3			3	18
O11	149-2	Kinase F/R + Probe	UNKNOWN	FAM	18.8769	18.7901	0.122702	521355	550308	40945.8	3	16
P11	149-2	Kinase F/R + Probe	UNKNOWN	FAM	18.7034	18.7901	0.122702	579261			3	15
A12	149-5	Kinase F/R + Probe	UNKNOWN	FAM	18.4471	18.5029	0.0788746	676760	654609	31326.2	3	15
B12	149-5	Kinase F/R + Probe	UNKNOWN	FAM	18.5586	18.5029	0.0788746	632458			3	15
C12	149-7	Kinase F/R + Probe	UNKNOWN	FAM	19.2913	19.2548	0.0516228	405413	414598	12988.3	3	16
D12	149-7	Kinase F/R + Probe	UNKNOWN	FAM	19.2183	19.2548	0.0516228	423782			3	16
E12	153-2	Kinase F/R + Probe	UNKNOWN	FAM	Undetermined	36.0463		#VALUE!	#VALUE!	#VALUE!	3	31
F12	153-2	Kinase F/R + Probe	UNKNOWN	FAM	36.0463	36.0463		15.5366			3	31
G12	153-5	Kinase F/R + Probe	UNKNOWN	FAM	Undetermined			#VALUE!	#VALUE!	#VALUE!	3	39
H12	153-5	Kinase F/R + Probe	UNKNOWN	FAM	Undetermined			#VALUE!			3	39
I12	153-7	Kinase F/R + Probe	UNKNOWN	FAM	Undetermined	34.7128		#VALUE!	#VALUE!	#VALUE!	3	32
J12	153-7	Kinase F/R + Probe	UNKNOWN	FAM	34.7128	34.7128		34.9032			3	31
K12	154-1	Kinase F/R + Probe	UNKNOWN	FAM	Undetermined			#VALUE!	#VALUE!	#VALUE!	3	39
L12	154-1	Kinase F/R + Probe	UNKNOWN	FAM	Undetermined			#VALUE!			3	39
M12	154-5	Kinase F/R + Probe	UNKNOWN	FAM	17.7778	18.2111	0.61278	1.01589e+06	808127	293821	3	15
N12	154-5	Kinase F/R + Probe	UNKNOWN	FAM	18.6444	18.2111	0.61278	600364			3	15
O12	154-7	Kinase F/R + Probe	UNKNOWN	FAM	15.5812	15.6225	0.0583225	3.85354e+06	3.75946e+06	133053	3	12
P12	154-7	Kinase F/R + Probe	UNKNOWN	FAM	15.6637	15.6225	0.0583225	3.66537e+06			3	12
A13	157-1	Kinase F/R + Probe	UNKNOWN	FAM	Undetermined			#VALUE!	#VALUE!	#VALUE!	3	39
B13	157-1	Kinase F/R + Probe	UNKNOWN	FAM	Undetermined			#VALUE!			3	39
C13	157-5	Kinase F/R + Probe	UNKNOWN	FAM	Undetermined			#VALUE!	#VALUE!	#VALUE!	3	39
D13	157-5	Kinase F/R + Probe	UNKNOWN	FAM	Undetermined			#VALUE!			3	39
E13	157-7	Kinase F/R + Probe	UNKNOWN	FAM	Undetermined			#VALUE!	#VALUE!	#VALUE!	3	39
F13	157-7	Kinase F/R + Probe	UNKNOWN	FAM	Undetermined			#VALUE!			3	39
G13	158-1	Kinase F/R + Probe	UNKNOWN	FAM	Undetermined			#VALUE!	#VALUE!	#VALUE!	3	39
H13	158-1	Kinase F/R + Probe	UNKNOWN	FAM	Undetermined			#VALUE!			3	39
I13	159-1	Kinase F/R + Probe	UNKNOWN	FAM	35.6744	35.6744		19.4714	#VALUE!	#VALUE!	3	33
J13	159-1	Kinase F/R + Probe	UNKNOWN	FAM	Undetermined	35.6744		#VALUE!			3	39
K13	159-5	Kinase F/R + Probe	UNKNOWN	FAM	Undetermined			#VALUE!	#VALUE!	#VALUE!	3	39
L13	159-5	Kinase F/R + Probe	UNKNOWN	FAM	Undetermined			#VALUE!			3	39
M13	159-7	Kinase F/R + Probe	UNKNOWN	FAM	Undetermined			#VALUE!	#VALUE!	#VALUE!	3	39
N13	159-7	Kinase F/R + Probe	UNKNOWN	FAM	Undetermined			#VALUE!			3	39
O13	160-1	Kinase F/R + Probe	UNKNOWN	FAM	Undetermined	36.975		#VALUE!	#VALUE!	#VALUE!	3	39
P13	160-1	Kinase F/R + Probe	UNKNOWN	FAM	36.975	36.975		8.84225			3	34
A14	160-5	Kinase F/R + Probe	UNKNOWN	FAM	Undetermined			#VALUE!	#VALUE!	#VALUE!	3	39
B14	160-5	Kinase F/R + Probe	UNKNOWN	FAM	Undetermined			#VALUE!			3	39
C14	160-7	Kinase F/R + Probe	UNKNOWN	FAM	16.6093	16.8647	0.36108	2.06467e+06	1.78955e+06	389084	3	13
D14	160-7	Kinase F/R + Probe	UNKNOWN	FAM	17.12	16.8647	0.36108	1.51443e+06			3	14
E14	162-1	Kinase F/R + Probe	UNKNOWN	FAM	18.179	18.2764	0.137733	796346	751948	62787.5	3	15
F14	162-1	Kinase F/R + Probe	UNKNOWN	FAM	18.3738	18.2764	0.137733	707551			3	15
G14	162-5	Kinase F/R + Probe	UNKNOWN	FAM	Undetermined			#VALUE!	#VALUE!	#VALUE!	3	39
H14	162-5	Kinase F/R + Probe	UNKNOWN	FAM	Undetermined			#VALUE!			3	39
I14	162-7	Kinase F/R + Probe	UNKNOWN	FAM	Undetermined			#VALUE!	#VALUE!	#VALUE!	3	39
J14	162-7	Kinase F/R + Probe	UNKNOWN	FAM	Undetermined			#VALUE!			3	39
K14	165-1	Kinase F/R + Probe	UNKNOWN	FAM	Undetermined			#VALUE!	#VALUE!	#VALUE!	3	39
L14	165-1	Kinase F/R + Probe	UNKNOWN	FAM	Undetermined			#VALUE!			3	39
M14	165-5	Kinase F/R + Probe	UNKNOWN	FAM	19.4989	19.6917	0.272587	357413	320132	52724.3	3	16
N14	165-5	Kinase F/R + Probe	UNKNOWN	FAM	19.8844	19.6917	0.272587	282850			3	16
O14	165-7	Kinase F/R + Probe	UNKNOWN	FAM	21.0979	21.1169	0.0269065	135425	133879	2186.24	3	18
P14	165-7	Kinase F/R + Probe	UNKNOWN	FAM	21.1359	21.1169	0.0269065	132333			3	18
A15	166-2	Kinase F/R + Probe	UNKNOWN	FAM	35.603	35.603		20.3342	#VALUE!	#VALUE!	3	32
B15	166-2	Kinase F/R + Probe	UNKNOWN	FAM	Undetermined	35.603		#VALUE!			3	39
C15	166-5	Kinase F/R + Probe	UNKNOWN	FAM	Undetermined			#VALUE!	#VALUE!	#VALUE!	3	39
D15	166-5	Kinase F/R + Probe	UNKNOWN	FAM	Undetermined			#VALUE!			3	39
E15	166-7	Kinase F/R + Probe	UNKNOWN	FAM	Undetermined			#VALUE!	#VALUE!	#VALUE!	3	39
F15	166-7	Kinase F/R + Probe	UNKNOWN	FAM	Undetermined			#VALUE!			3	39
G15	169-1	Kinase F/R + Probe	UNKNOWN	FAM	35.0402	35.107	0.0945276	28.614	27.499	1.57684	3	32
H15	169-1	Kinase F/R + Probe	UNKNOWN	FAM	35.1739	35.107	0.0945276	26.384			3	32
I15	169-5	Kinase F/R + Probe	UNKNOWN	FAM	Undetermined			#VALUE!	#VALUE!	#VALUE!	3	39
J15	169-5	Kinase F/R + Probe	UNKNOWN	FAM	Undetermined			#VALUE!			3	39
K15	169-7	Kinase F/R + Probe	UNKNOWN	FAM	24.536	24.5763	0.0569812	16804.3	16403.2	567.19	3	21
L15	169-7	Kinase F/R + Probe	UNKNOWN	FAM	24.6166	24.5763	0.0569812	16002.1			3	21
M15	173-1	Kinase F/R + Probe	UNKNOWN	FAM	Undetermined			#VALUE!	#VALUE!	#VALUE!	3	39
N15	173-1	Kinase F/R + Probe	UNKNOWN	FAM	Undetermined			#VALUE!			3	39
O15	175-2	Kinase F/R + Probe	UNKNOWN	FAM	16.9019	16.9389	0.0523201	1.72872e+06	1.69076e+06	53682.5	3	13
P15	175-2	Kinase F/R + Probe	UNKNOWN	FAM	16.9759	16.9389	0.0523201	1.6528e+06			3	14
A16	175-5	Kinase F/R + Probe	UNKNOWN	FAM	29.4944	29.8354	0.482281	828.743	688.28	198.645	3	26
B16	175-5	Kinase F/R + Probe	UNKNOWN	FAM	30.1764	29.8354	0.482281	547.816			3	27
C16	175-7	Kinase F/R + Probe	UNKNOWN	FAM	34.3478	33.6853	0.936909	43.5606	70.4574	38.0378	3	30
D16	175-7	Kinase F/R + Probe	UNKNOWN	FAM	33.0228	33.6853	0.936909	97.3541			3	29
E16	177-1	Kinase F/R + Probe	UNKNOWN	FAM	35.1391	35.1391		26.9467	#VALUE!	#VALUE!	3	32
F16	177-1	Kinase F/R + Probe	UNKNOWN	FAM	Undetermined	35.1391		#VALUE!			3	39
G16	181-1	Kinase F/R + Probe	UNKNOWN	FAM	Undetermined			#VALUE!	#VALUE!	#VALUE!	3	39
H16	181-1	Kinase F/R + Probe	UNKNOWN	FAM	Undetermined			#VALUE!			3	39
I16	181-5	Kinase F/R + Probe	UNKNOWN	FAM	Undetermined			#VALUE!	#VALUE!	#VALUE!	3	39
J16	181-5	Kinase F/R + Probe	UNKNOWN	FAM	Undetermined			#VALUE!			3	39
K16	181-7	Kinase F/R + Probe	UNKNOWN	FAM	21.4935	21.6561	0.23	106518	96976.6	13494	3	18
L16	181-7	Kinase F/R + Probe	UNKNOWN	FAM	21.8187	21.6561	0.23	87434.9			3	19
A23	AB78	Kinase F/R + Probe	UNKNOWN	FAM	32.5636	32.5248	0.0548948	128.642	131.745	4.38866	3	29
B23	AB78	Kinase F/R + Probe	UNKNOWN	FAM	32.486	32.5248	0.0548948	134.848			3	29
C23	AB79	Kinase F/R + Probe	UNKNOWN	FAM	13.0736	12.9146	0.224809	1.76544e+07	1.95332e+07	2.65701e+06	3	10
D23	AB79	Kinase F/R + Probe	UNKNOWN	FAM	12.7557	12.9146	0.224809	2.1412e+07			3	9
E23	AB80	Kinase F/R + Probe	UNKNOWN	FAM	30.2751	30.2751		515.989	#VALUE!	#VALUE!	3	27
F23	AB80	Kinase F/R + Probe	UNKNOWN	FAM	Undetermined	30.2751		#VALUE!			3	39
G23	AB81	Kinase F/R + Probe	UNKNOWN	FAM	30.2998	30.4791	0.253582	508.298	458.585	70.3044	3	27
H23	AB81	Kinase F/R + Probe	UNKNOWN	FAM	30.6584	30.4791	0.253582	408.872			3	27
I23	AB82	Kinase F/R + Probe	UNKNOWN	FAM	32.3913	32.3229	0.096699	142.831	149.011	8.74073	3	29
J23	AB82	Kinase F/R + Probe	UNKNOWN	FAM	32.2545	32.3229	0.096699	155.192			3	29
K23	AB83	Kinase F/R + Probe	UNKNOWN	FAM	19.6006	19.7073	0.150845	336027	315623	28856.8	3	16
L23	AB83	Kinase F/R + Probe	UNKNOWN	FAM	19.8139	19.7073	0.150845	295218			3	16
M23	AB84	Kinase F/R + Probe	UNKNOWN	FAM	18.0629	18.1137	0.0717602	854470	828948	36093.2	3	15
N23	AB84	Kinase F/R + Probe	UNKNOWN	FAM	18.1644	18.1137	0.0717602	803426			3	15
O23	AB85	Kinase F/R + Probe	UNKNOWN	FAM	15.2287	14.7295	0.706041	4.77282e+06	6.76105e+06	2.81178e+06	3	12
P23	AB85	Kinase F/R + Probe	UNKNOWN	FAM	14.2302	14.7295	0.706041	8.74928e+06			3	12
G22	AB86	Kinase F/R + Probe	UNKNOWN	FAM	15.1521	15.2107	0.0829477	5.00011e+06	4.8283e+06	242979	3	12
H22	AB86	Kinase F/R + Probe	UNKNOWN	FAM	15.2694	15.2107	0.0829477	4.65648e+06			3	12
I22	AB87	Kinase F/R + Probe	UNKNOWN	FAM	32.4395	32.1404	0.422975	138.71	169.068	42.9333	3	29
J22	AB87	Kinase F/R + Probe	UNKNOWN	FAM	31.8413	32.1404	0.422975	199.426			3	29
K22	AB88	Kinase F/R + Probe	UNKNOWN	FAM	19.6641	19.617	0.0666203	323322	332835	13454.7	3	16
L22	AB88	Kinase F/R + Probe	UNKNOWN	FAM	19.5699	19.617	0.0666203	342349			3	16
M22	AB89	Kinase F/R + Probe	UNKNOWN	FAM	14.2618	13.7153	0.772914	8.58315e+06	1.26235e+07	5.71386e+06	3	11
N22	AB89	Kinase F/R + Probe	UNKNOWN	FAM	13.1688	13.7153	0.772914	1.66638e+07			3	11
O22	AB90	Kinase F/R + Probe	UNKNOWN	FAM	20.2345	19.5177	1.01359	228714	387322	224307	3	17
P22	AB90	Kinase F/R + Probe	UNKNOWN	FAM	18.801	19.5177	1.01359	545931			3	17
M16	TH01-1	Kinase F/R + Probe	UNKNOWN	FAM	Undetermined			#VALUE!	#VALUE!	#VALUE!	3	39
N16	TH01-1	Kinase F/R + Probe	UNKNOWN	FAM	Undetermined			#VALUE!			3	39
O16	TH01-5	Kinase F/R + Probe	UNKNOWN	FAM	Undetermined			#VALUE!	#VALUE!	#VALUE!	3	39
P16	TH01-5	Kinase F/R + Probe	UNKNOWN	FAM	Undetermined			#VALUE!			3	39
A17	TH01-7	Kinase F/R + Probe	UNKNOWN	FAM	Undetermined			#VALUE!	#VALUE!	#VALUE!	3	39
B17	TH01-7	Kinase F/R + Probe	UNKNOWN	FAM	Undetermined			#VALUE!			3	39
C17	TH03-1	Kinase F/R + Probe	UNKNOWN	FAM	Undetermined			#VALUE!	#VALUE!	#VALUE!	3	39
D17	TH03-1	Kinase F/R + Probe	UNKNOWN	FAM	Undetermined			#VALUE!			3	39
E17	TH03-5	Kinase F/R + Probe	UNKNOWN	FAM	Undetermined			#VALUE!	#VALUE!	#VALUE!	3	39
F17	TH03-5	Kinase F/R + Probe	UNKNOWN	FAM	Undetermined			#VALUE!			3	39
G17	TH03-7	Kinase F/R + Probe	UNKNOWN	FAM	Undetermined			#VALUE!	#VALUE!	#VALUE!	3	39
H17	TH03-7	Kinase F/R + Probe	UNKNOWN	FAM	Undetermined			#VALUE!			3	39
I17	TH04-1	Kinase F/R + Probe	UNKNOWN	FAM	Undetermined			#VALUE!	#VALUE!	#VALUE!	3	7
J17	TH04-1	Kinase F/R + Probe	UNKNOWN	FAM	Undetermined			#VALUE!			3	39
K17	TH04-5	Kinase F/R + Probe	UNKNOWN	FAM	Undetermined	37.102		#VALUE!	#VALUE!	#VALUE!	3	39
L17	TH04-5	Kinase F/R + Probe	UNKNOWN	FAM	37.102	37.102		8.18664			3	30
M17	TH04-7	Kinase F/R + Probe	UNKNOWN	FAM	Undetermined			#VALUE!	#VALUE!	#VALUE!	3	39
N17	TH04-7	Kinase F/R + Probe	UNKNOWN	FAM	Undetermined			#VALUE!			3	39
O17	TH07-1	Kinase F/R + Probe	UNKNOWN	FAM	Undetermined			#VALUE!	#VALUE!	#VALUE!	3	39
P17	TH07-1	Kinase F/R + Probe	UNKNOWN	FAM	Undetermined			#VALUE!			3	39
A18	TH07-5	Kinase F/R + Probe	UNKNOWN	FAM	Undetermined			#VALUE!	#VALUE!	#VALUE!	3	39
B18	TH07-5	Kinase F/R + Probe	UNKNOWN	FAM	Undetermined			#VALUE!			3	39
C18	TH07-7	Kinase F/R + Probe	UNKNOWN	FAM	Undetermined			#VALUE!	#VALUE!	#VALUE!	3	39
D18	TH07-7	Kinase F/R + Probe	UNKNOWN	FAM	Undetermined			#VALUE!			3	39
E18	TH10-1	Kinase F/R + Probe	UNKNOWN	FAM	Undetermined			#VALUE!	#VALUE!	#VALUE!	3	39
F18	TH10-1	Kinase F/R + Probe	UNKNOWN	FAM	Undetermined			#VALUE!			3	39
G18	TH10-5	Kinase F/R + Probe	UNKNOWN	FAM	Undetermined			#VALUE!	#VALUE!	#VALUE!	3	39
H18	TH10-5	Kinase F/R + Probe	UNKNOWN	FAM	Undetermined			#VALUE!			3	39
I18	TH10-7	Kinase F/R + Probe	UNKNOWN	FAM	Undetermined			#VALUE!	#VALUE!	#VALUE!	3	39
J18	TH10-7	Kinase F/R + Probe	UNKNOWN	FAM	Undetermined			#VALUE!			3	39
K18	TH17-1	Kinase F/R + Probe	UNKNOWN	FAM	Undetermined			#VALUE!	#VALUE!	#VALUE!	3	39
L18	TH17-1	Kinase F/R + Probe	UNKNOWN	FAM	Undetermined			#VALUE!			3	39
M18	TH17-5	Kinase F/R + Probe	UNKNOWN	FAM	16.5593	16.6404	0.114583	2.12832e+06	2.02864e+06	140970	3	13
N18	TH17-5	Kinase F/R + Probe	UNKNOWN	FAM	16.7214	16.6404	0.114583	1.92896e+06			3	13
O18	TH17-7	Kinase F/R + Probe	UNKNOWN	FAM	18.5376	19.5055	1.36877	640583	419215	313062	3	15
P18	TH17-7	Kinase F/R + Probe	UNKNOWN	FAM	20.4733	19.5055	1.36877	197846			3	17
A19	TH19-1	Kinase F/R + Probe	UNKNOWN	FAM	Undetermined			#VALUE!	#VALUE!	#VALUE!	3	39
B19	TH19-1	Kinase F/R + Probe	UNKNOWN	FAM	Undetermined			#VALUE!			3	39
C19	TH19-5	Kinase F/R + Probe	UNKNOWN	FAM	31.8101	31.6818	0.181454	203.237	220.364	24.2204	3	29
D19	TH19-5	Kinase F/R + Probe	UNKNOWN	FAM	31.5535	31.6818	0.181454	237.49			3	28
E19	TH19-7	Kinase F/R + Probe	UNKNOWN	FAM	33.0714	33.035	0.0514367	94.522	96.6555	3.01711	3	30
F19	TH19-7	Kinase F/R + Probe	UNKNOWN	FAM	32.9987	33.035	0.0514367	98.7889			3	29
G19	TH21-1	Kinase F/R + Probe	UNKNOWN	FAM	Undetermined			#VALUE!	#VALUE!	#VALUE!	3	39
H19	TH21-1	Kinase F/R + Probe	UNKNOWN	FAM	Undetermined			#VALUE!			3	39
I19	TH21-5	Kinase F/R + Probe	UNKNOWN	FAM	19.1914	19.1298	0.0871017	430756	447476	23645.5	3	16
J19	TH21-5	Kinase F/R + Probe	UNKNOWN	FAM	19.0682	19.1298	0.0871017	464196			3	16
K19	TH21-7	Kinase F/R + Probe	UNKNOWN	FAM	19.3072	19.4251	0.166764	401529	374753	37866.9	3	16
L19	TH21-7	Kinase F/R + Probe	UNKNOWN	FAM	19.543	19.4251	0.166764	347977			3	16
M19	TH22-1	Kinase F/R + Probe	UNKNOWN	FAM	34.1247	35.2024	1.52401	49.8754	31.6788	25.7337	3	31
N19	TH22-1	Kinase F/R + Probe	UNKNOWN	FAM	36.28	35.2024	1.52401	13.4823			3	33
O19	TH22-5	Kinase F/R + Probe	UNKNOWN	FAM	33.4251	33.8092	0.543224	76.2608	62.0508	20.0959	3	30
P19	TH22-5	Kinase F/R + Probe	UNKNOWN	FAM	34.1933	33.8092	0.543224	47.8408			3	31
A20	TH22-7	Kinase F/R + Probe	UNKNOWN	FAM	35.0514	34.6152	0.616855	28.4198	38.339	14.0279	3	32
B20	TH22-7	Kinase F/R + Probe	UNKNOWN	FAM	34.179	34.6152	0.616855	48.2582			3	31
C20	TH24-1	Kinase F/R + Probe	UNKNOWN	FAM	Undetermined			#VALUE!	#VALUE!	#VALUE!	3	39
D20	TH24-1	Kinase F/R + Probe	UNKNOWN	FAM	Undetermined			#VALUE!			3	39
E20	TH24-5	Kinase F/R + Probe	UNKNOWN	FAM	18.9506	18.9424	0.0115503	498553	501037	3512.34	3	16
F20	TH24-5	Kinase F/R + Probe	UNKNOWN	FAM	18.9343	18.9424	0.0115503	503520			3	16
G20	TH24-7	Kinase F/R + Probe	UNKNOWN	FAM	17.8581	18.0478	0.268224	967555	868065	140699	3	14
H20	TH24-7	Kinase F/R + Probe	UNKNOWN	FAM	18.2375	18.0478	0.268224	768576			3	15
I20	TH27-1	Kinase F/R + Probe	UNKNOWN	FAM	Undetermined			#VALUE!	#VALUE!	#VALUE!	3	39
J20	TH27-1	Kinase F/R + Probe	UNKNOWN	FAM	Undetermined			#VALUE!			3	39
K20	TH27-5	Kinase F/R + Probe	UNKNOWN	FAM	Undetermined			#VALUE!	#VALUE!	#VALUE!	3	39
L20	TH27-5	Kinase F/R + Probe	UNKNOWN	FAM	Undetermined			#VALUE!			3	39
M20	TH27-7	Kinase F/R + Probe	UNKNOWN	FAM	34.4244	33.1442	1.81061	41.5798	119.148	109.698	3	31
N20	TH27-7	Kinase F/R + Probe	UNKNOWN	FAM	31.8639	33.1442	1.81061	196.716			3	29
O20	TH31-1	Kinase F/R + Probe	UNKNOWN	FAM	Undetermined			#VALUE!	#VALUE!	#VALUE!	3	39
P20	TH31-1	Kinase F/R + Probe	UNKNOWN	FAM	Undetermined			#VALUE!			3	39
A21	TH31-5	Kinase F/R + Probe	UNKNOWN	FAM	36.7241	36.7241		10.2968	#VALUE!	#VALUE!	3	32
B21	TH31-5	Kinase F/R + Probe	UNKNOWN	FAM	Undetermined	36.7241		#VALUE!			3	39
C21	TH31-7	Kinase F/R + Probe	UNKNOWN	FAM	35.3542	34.6764	0.958496	23.6492	38.7458	21.3498	3	32
D21	TH31-7	Kinase F/R + Probe	UNKNOWN	FAM	33.9986	34.6764	0.958496	53.8424			3	31
E21	TH32-1	Kinase F/R + Probe	UNKNOWN	FAM	Undetermined	38.4043		#VALUE!	#VALUE!	#VALUE!	3	39
F21	TH32-1	Kinase F/R + Probe	UNKNOWN	FAM	38.4043	38.4043		3.7137			3	33
G21	TH32-5	Kinase F/R + Probe	UNKNOWN	FAM	35.3934	35.3934		23.0923	#VALUE!	#VALUE!	3	30
H21	TH32-5	Kinase F/R + Probe	UNKNOWN	FAM	Undetermined	35.3934		#VALUE!			3	39
I21	TH32-7	Kinase F/R + Probe	UNKNOWN	FAM	34.8266	34.0137	1.14968	32.5735	59.9797	38.7581	3	31
J21	TH32-7	Kinase F/R + Probe	UNKNOWN	FAM	33.2008	34.0137	1.14968	87.3858			3	30
K21	TH34-1	Kinase F/R + Probe	UNKNOWN	FAM	32.0622	32.2765	0.303023	174.399	154.428	28.2433	3	29
L21	TH34-1	Kinase F/R + Probe	UNKNOWN	FAM	32.4908	32.2765	0.303023	134.457			3	29
M21	TH34-5	Kinase F/R + Probe	UNKNOWN	FAM	22.4057	21.7219	0.966913	61231.6	100825	55992.9	3	19
N21	TH34-5	Kinase F/R + Probe	UNKNOWN	FAM	21.0382	21.7219	0.966913	140418			3	19
O21	TH34-7	Kinase F/R + Probe	UNKNOWN	FAM	23.4771	23.8299	0.498931	31956.5	26390.3	7871.73	3	21
P21	TH34-7	Kinase F/R + Probe	UNKNOWN	FAM	24.1826	23.8299	0.498931	20824.2			3	21
A22	TH36-2	Kinase F/R + Probe	UNKNOWN	FAM	32.9668	32.819	0.209011	100.718	110.614	13.9948	3	30
B22	TH36-2	Kinase F/R + Probe	UNKNOWN	FAM	32.6712	32.819	0.209011	120.509			3	29
C22	TH36-5	Kinase F/R + Probe	UNKNOWN	FAM	23.3578	23.563	0.290182	34356	30568.6	5356.26	3	20
D22	TH36-5	Kinase F/R + Probe	UNKNOWN	FAM	23.7681	23.563	0.290182	26781.1			3	21
E22	TH36-7	Kinase F/R + Probe	UNKNOWN	FAM	20.6439	20.8188	0.247331	178387	161326	24127.3	3	17
F22	TH36-7	Kinase F/R + Probe	UNKNOWN	FAM	20.9937	20.8188	0.247331	144266			3	18
A24	Long kinase 0274-1	Kinase F/R + Probe	STANDARD	FAM	13.8653	13.8859	0.0292027	1.09189e+07	1.07837e+07	191127	3	11
B24	Long kinase 0274-1	Kinase F/R + Probe	STANDARD	FAM	13.9066	13.8859	0.0292027	1.06486e+07			3	11
C24	Long kinase 0274-2	Kinase F/R + Probe	STANDARD	FAM	20.2998	20.1595	0.198461	219822	240234	28867.8	3	17
D24	Long kinase 0274-2	Kinase F/R + Probe	STANDARD	FAM	20.0191	20.1595	0.198461	260647			3	17
E24	Long kinase 0274-3	Kinase F/R + Probe	STANDARD	FAM	22.1953	23.4482	1.77198	69572.1	42386.7	38446.1	3	18
F24	Long kinase 0274-3	Kinase F/R + Probe	STANDARD	FAM	24.7012	23.4482	1.77198	15201.2			3	21
G24	Long kinase 0274-4	Kinase F/R + Probe	STANDARD	FAM	28.2494	28.6801	0.609064	1764.35	1405.19	507.94	3	25
H24	Long kinase 0274-4	Kinase F/R + Probe	STANDARD	FAM	29.1108	28.6801	0.609064	1046.02			3	26
I24	Long kinase 0274-5	Kinase F/R + Probe	STANDARD	FAM	38.4264	36.9405	2.10134	3.66424	12.9568	13.1417	3	35
J24	Long kinase 0274-5	Kinase F/R + Probe	STANDARD	FAM	35.4547	36.9405	2.10134	22.2494			3	33
K24	Long kinase 0274-6	Kinase F/R + Probe	STANDARD	FAM	Undetermined	28.2053		#VALUE!	#VALUE!	#VALUE!	3	21
L24	Long kinase 0274-6	Kinase F/R + Probe	STANDARD	FAM	28.2053	28.2053					3	4
M24	NTC	Kinase F/R + Probe	NTC	FAM	Undetermined						3	39
N24	NTC	Kinase F/R + Probe	NTC	FAM	Undetermined						3	39
O24	NTC	Kinase F/R + Probe	NTC	FAM	Undetermined						3	39
P24	NTC	Kinase F/R + Probe	NTC	FAM	Undetermined						3	39

## Sheet: Longum_P2
Block Type	384-Well Block
Calibration Background is expired	Yes
Calibration Background performed on	2015-09-28 10:38:58 AM NZDT
Calibration FAM is expired	Yes
Calibration FAM performed on	2015-09-28 12:44:37 PM NZDT
Calibration NED is expired	Yes
Calibration NED performed on	2015-09-28 12:27:45 PM NZDT
Calibration ROI is expired	Yes
Calibration ROI performed on	2015-09-28 10:31:42 AM NZDT
Calibration ROX is expired	Yes
Calibration ROX performed on	2015-09-28 11:50:26 AM NZDT
Calibration SYBR is expired	Yes
Calibration SYBR performed on	2015-09-28 11:35:56 AM NZDT
Calibration TAMRA is expired	Yes
Calibration TAMRA performed on	2015-09-28 12:05:53 PM NZDT
Calibration Uniformity is expired	Yes
Calibration Uniformity performed on	2015-09-28 11:17:29 AM NZDT
Calibration VIC is expired	Yes
Calibration VIC performed on	2015-09-28 12:36:53 PM NZDT
Chemistry	TAQMAN
Experiment File Name	E:\Taq sialidase - Kinase comparisons\10-Chin formula 384 P2 Taq Kinase.eds
Experiment Name	Chi formula P2 384 taq Kinase
Experiment Run Start Time	2016-07-27 21:05:51 PM NZST
Experiment Run Stop Time	2016-07-27 22:01:02 PM NZST
Experiment Type	Standard Curve
Instrument Name	ViiA7
Instrument Serial Number	278880388
Instrument Type	ViiA(TM) 7 System
Passive Reference	ROX
Quantification Cycle Method	Ct
Signal Smoothing On	true
Stage/ Cycle where Analysis is performed	Stage 2, Step 2
Well Position	Sample Name	Target Name	Task	Reporter	CT	Ct Mean	Ct SD	Quant by formula	Av. Q/formula	SD Q/formula	Baseline Start	Baseline End
I19	AF001A	Kinase F1/R1 + probe	UNKNOWN	FAM	Undetermined			#VALUE!	#VALUE!	#VALUE!	3	39
J19	AF001A	Kinase F1/R1 + probe	UNKNOWN	FAM	Undetermined			#VALUE!			3	39
K19	AF001B	Kinase F1/R1 + probe	UNKNOWN	FAM	Undetermined			#VALUE!	#VALUE!	#VALUE!	3	39
L19	AF001B	Kinase F1/R1 + probe	UNKNOWN	FAM	Undetermined			#VALUE!			3	39
M19	AF001C	Kinase F1/R1 + probe	UNKNOWN	FAM	Undetermined			#VALUE!	#VALUE!	#VALUE!	3	39
N19	AF001C	Kinase F1/R1 + probe	UNKNOWN	FAM	Undetermined			#VALUE!			3	39
O19	AF001D	Kinase F1/R1 + probe	UNKNOWN	FAM	38.879	38.879		2.78412	#VALUE!	#VALUE!	3	35
P19	AF001D	Kinase F1/R1 + probe	UNKNOWN	FAM	Undetermined	38.879		#VALUE!			3	39
A20	AF003A	Kinase F1/R1 + probe	UNKNOWN	FAM	33.5017	33.479	0.0321503	72.7966	73.8151	1.44039	3	30
B20	AF003A	Kinase F1/R1 + probe	UNKNOWN	FAM	33.4562	33.479	0.0321503	74.8336			3	30
C20	AF003B	Kinase F1/R1 + probe	UNKNOWN	FAM	34.75	34.9468	0.278215	34.1238	30.4993	5.12583	3	31
D20	AF003B	Kinase F1/R1 + probe	UNKNOWN	FAM	35.1435	34.9468	0.278215	26.8748			3	32
E20	AF003C	Kinase F1/R1 + probe	UNKNOWN	FAM	34.2338	34.1193	0.161909	46.6819	50.162	4.92153	3	31
F20	AF003C	Kinase F1/R1 + probe	UNKNOWN	FAM	34.0048	34.1193	0.161909	53.642			3	31
G20	AF003D	Kinase F1/R1 + probe	UNKNOWN	FAM	32.0062	32.2472	0.340806	180.433	157.551	32.3594	3	28
H20	AF003D	Kinase F1/R1 + probe	UNKNOWN	FAM	32.4882	32.2472	0.340806	134.67			3	29
A1	AF004A	Kinase F1/R1 + probe	UNKNOWN	FAM	37.3194	37.3194		7.17449	#VALUE!	#VALUE!	3	34
B1	AF004A	Kinase F1/R1 + probe	UNKNOWN	FAM	Undetermined	37.3194		#VALUE!			3	39
C1	AF004B	Kinase F1/R1 + probe	UNKNOWN	FAM	39.2352	39.2352		2.24287	#VALUE!	#VALUE!	3	35
D1	AF004B	Kinase F1/R1 + probe	UNKNOWN	FAM	Undetermined	39.2352		#VALUE!			3	35
E1	AF004C	Kinase F1/R1 + probe	UNKNOWN	FAM	Undetermined			#VALUE!	#VALUE!	#VALUE!	3	39
F1	AF004C	Kinase F1/R1 + probe	UNKNOWN	FAM	Undetermined			#VALUE!			3	39
G1	AF004D	Kinase F1/R1 + probe	UNKNOWN	FAM	36.135	36.8799	1.05349	14.723	10.3417	6.19611	3	33
H1	AF004D	Kinase F1/R1 + probe	UNKNOWN	FAM	37.6248	36.8799	1.05349	5.96042			3	34
I1	AF005A	Kinase F1/R1 + probe	UNKNOWN	FAM	34.4903	33.9552	0.756836	39.9497	58.2236	25.8431	3	31
J1	AF005A	Kinase F1/R1 + probe	UNKNOWN	FAM	33.42	33.9552	0.756836	76.4974			3	30
K1	AF005B	Kinase F1/R1 + probe	UNKNOWN	FAM	Undetermined			#VALUE!	#VALUE!	#VALUE!	3	39
L1	AF005B	Kinase F1/R1 + probe	UNKNOWN	FAM	Undetermined			#VALUE!			3	39
M1	AF005C	Kinase F1/R1 + probe	UNKNOWN	FAM	28.419	28.3909	0.0398352	1591.78	1619.46	39.1518	3	25
N1	AF005C	Kinase F1/R1 + probe	UNKNOWN	FAM	28.3627	28.3909	0.0398352	1647.15			3	25
O1	AF005D	Kinase F1/R1 + probe	UNKNOWN	FAM	Undetermined	39.6185		#VALUE!	#VALUE!	#VALUE!	3	39
P1	AF005D	Kinase F1/R1 + probe	UNKNOWN	FAM	39.6185	39.6185		1.77731			3	35
A2	AF009A	Kinase F1/R1 + probe	UNKNOWN	FAM	23.608	23.6867	0.111268	29514.3	28170.1	1900.99	3	20
B2	AF009A	Kinase F1/R1 + probe	UNKNOWN	FAM	23.7654	23.6867	0.111268	26825.9			3	20
C2	AF009B	Kinase F1/R1 + probe	UNKNOWN	FAM	25.2743	25.2785	0.00606915	10735.6	10707.7	39.4432	3	22
D2	AF009B	Kinase F1/R1 + probe	UNKNOWN	FAM	25.2828	25.2785	0.00606915	10679.8			3	22
E2	AF009C	Kinase F1/R1 + probe	UNKNOWN	FAM	22.4707	22.4931	0.031689	58862.3	58072.5	1116.88	3	19
F2	AF009C	Kinase F1/R1 + probe	UNKNOWN	FAM	22.5155	22.4931	0.031689	57282.8			3	19
G2	AF009D	Kinase F1/R1 + probe	UNKNOWN	FAM	21.4306	21.5867	0.220655	110659	101112	13501.3	3	18
H2	AF009D	Kinase F1/R1 + probe	UNKNOWN	FAM	21.7427	21.5867	0.220655	91565.3			3	18
I20	AF010A	Kinase F1/R1 + probe	UNKNOWN	FAM	37.9491	36.6746	1.80232	4.89565	13.9465	12.7998	3	34
J20	AF010A	Kinase F1/R1 + probe	UNKNOWN	FAM	35.4002	36.6746	1.80232	22.9973			3	32
K20	AF010B	Kinase F1/R1 + probe	UNKNOWN	FAM	36.5994	37.1018	0.710433	11.1065	8.57117	3.58544	3	33
L20	AF010B	Kinase F1/R1 + probe	UNKNOWN	FAM	37.6041	37.1018	0.710433	6.03589			3	34
M20	AF010C	Kinase F1/R1 + probe	UNKNOWN	FAM	Undetermined			#VALUE!	#VALUE!	#VALUE!	3	39
N20	AF010C	Kinase F1/R1 + probe	UNKNOWN	FAM	Undetermined			#VALUE!			3	39
O20	AF010D	Kinase F1/R1 + probe	UNKNOWN	FAM	30.4715	30.6082	0.193376	457.991	422.968	49.53	3	27
P20	AF010D	Kinase F1/R1 + probe	UNKNOWN	FAM	30.745	30.6082	0.193376	387.945			3	28
A21	AF011A	Kinase F1/R1 + probe	UNKNOWN	FAM	18.2755	18.2153	0.0851488	751056	779531	40268.8	3	15
B21	AF011A	Kinase F1/R1 + probe	UNKNOWN	FAM	18.155	18.2153	0.0851488	808005			3	15
C21	AF011B	Kinase F1/R1 + probe	UNKNOWN	FAM	17.4056	17.7943	0.549757	1.27339e+06	1.03388e+06	338717	3	14
D21	AF011B	Kinase F1/R1 + probe	UNKNOWN	FAM	18.1831	17.7943	0.549757	794370			3	15
E21	AF011C	Kinase F1/R1 + probe	UNKNOWN	FAM	19.1022	19.0967	0.00783864	454723	456258	2170.61	3	16
F21	AF011C	Kinase F1/R1 + probe	UNKNOWN	FAM	19.0911	19.0967	0.00783864	457793			3	16
G21	AF011D	Kinase F1/R1 + probe	UNKNOWN	FAM	17.544	17.7061	0.229302	1.17081e+06	1.06622e+06	147914	3	14
H21	AF011D	Kinase F1/R1 + probe	UNKNOWN	FAM	17.8683	17.7061	0.229302	961631			3	15
I2	AF012A	Kinase F1/R1 + probe	UNKNOWN	FAM	19.0415	19.0041	0.0528704	471783	482735	15488.1	3	16
J2	AF012A	Kinase F1/R1 + probe	UNKNOWN	FAM	18.9668	19.0041	0.0528704	493687			3	16
K2	AF012B	Kinase F1/R1 + probe	UNKNOWN	FAM	16.5948	16.6255	0.0433782	2.08297e+06	2.0449e+06	53832.7	3	13
L2	AF012B	Kinase F1/R1 + probe	UNKNOWN	FAM	16.6562	16.6255	0.0433782	2.00684e+06			3	13
M2	AF012C	Kinase F1/R1 + probe	UNKNOWN	FAM	17.6344	17.7837	0.211125	1.10829e+06	1.01644e+06	129894	3	14
N2	AF012C	Kinase F1/R1 + probe	UNKNOWN	FAM	17.933	17.7837	0.211125	924589			3	14
O2	AF012D	Kinase F1/R1 + probe	UNKNOWN	FAM	20.5889	20.632	0.0609639	184445	179743	6649.35	3	17
P2	AF012D	Kinase F1/R1 + probe	UNKNOWN	FAM	20.6751	20.632	0.0609639	175042			3	17
A3	AF014A	Kinase F1/R1 + probe	UNKNOWN	FAM	29.416	29.7085	0.413711	869.134	739.24	183.698	3	26
B3	AF014A	Kinase F1/R1 + probe	UNKNOWN	FAM	30.0011	29.7085	0.413711	609.346			3	27
C3	AF014B	Kinase F1/R1 + probe	UNKNOWN	FAM	31.1588	31.3215	0.230176	301.785	274.733	38.2573	3	28
D3	AF014B	Kinase F1/R1 + probe	UNKNOWN	FAM	31.4843	31.3215	0.230176	247.681			3	28
E3	AF014C	Kinase F1/R1 + probe	UNKNOWN	FAM	31.7987	32.2327	0.613821	204.651	162.743	59.2668	3	28
F3	AF014C	Kinase F1/R1 + probe	UNKNOWN	FAM	32.6668	32.2327	0.613821	120.835			3	29
G3	AF014D	Kinase F1/R1 + probe	UNKNOWN	FAM	33.4671	33.8924	0.601504	74.3434	59.3529	21.1998	3	30
H3	AF014D	Kinase F1/R1 + probe	UNKNOWN	FAM	34.3177	33.8924	0.601504	44.3623			3	31
I21	AF016A	Kinase F1/R1 + probe	UNKNOWN	FAM	36.9848	36.0302	1.35013	8.78969	18.3986	13.589	3	34
J21	AF016A	Kinase F1/R1 + probe	UNKNOWN	FAM	35.0755	36.0302	1.35013	28.0074			3	32
K21	AF016B	Kinase F1/R1 + probe	UNKNOWN	FAM	30.8538	31.0772	0.315946	363.155	320.025	60.9957	3	28
L21	AF016B	Kinase F1/R1 + probe	UNKNOWN	FAM	31.3006	31.0772	0.315946	276.895			3	28
M21	AF016C	Kinase F1/R1 + probe	UNKNOWN	FAM	35.7444	35.7444		18.6614	#VALUE!	#VALUE!	3	32
N21	AF016C	Kinase F1/R1 + probe	UNKNOWN	FAM	Undetermined	35.7444		#VALUE!			3	39
O21	AF016D	Kinase F1/R1 + probe	UNKNOWN	FAM	37.5169	36.5209	1.40859	6.36405	13.843	10.5768	3	34
P21	AF016D	Kinase F1/R1 + probe	UNKNOWN	FAM	35.5248	36.5209	1.40859	21.3219			3	32
I3	AF018A	Kinase F1/R1 + probe	UNKNOWN	FAM	33.8104	33.9098	0.140596	60.358	56.9271	4.85203	3	31
J3	AF018A	Kinase F1/R1 + probe	UNKNOWN	FAM	34.0093	33.9098	0.140596	53.4962			3	31
K3	AF018B	Kinase F1/R1 + probe	UNKNOWN	FAM	35.9274	36.3198	0.554906	16.6994	13.5355	4.47448	3	33
L3	AF018B	Kinase F1/R1 + probe	UNKNOWN	FAM	36.7122	36.3198	0.554906	10.3716			3	33
M3	AF018C	Kinase F1/R1 + probe	UNKNOWN	FAM	27.3139	28.6676	1.91442	3113.05	1857.48	1775.65	3	24
N3	AF018C	Kinase F1/R1 + probe	UNKNOWN	FAM	30.0213	28.6676	1.91442	601.908			3	27
O3	AF018D	Kinase F1/R1 + probe	UNKNOWN	FAM	22.5232	22.8306	0.434775	57015.6	48136.4	12557.1	3	20
P3	AF018D	Kinase F1/R1 + probe	UNKNOWN	FAM	23.138	22.8306	0.434775	39257.2			3	20
A4	AF023A	Kinase F1/R1 + probe	UNKNOWN	FAM	33.8227	34.1509	0.464184	59.9111	50.0668	13.922	3	31
B4	AF023A	Kinase F1/R1 + probe	UNKNOWN	FAM	34.4791	34.1509	0.464184	40.2225			3	31
C4	AF023B	Kinase F1/R1 + probe	UNKNOWN	FAM	31.0365	31.254	0.30759	325.031	287.321	53.3308	3	28
D4	AF023B	Kinase F1/R1 + probe	UNKNOWN	FAM	31.4715	31.254	0.30759	249.61			3	28
E4	AF023C	Kinase F1/R1 + probe	UNKNOWN	FAM	33.1729	32.943	0.325126	88.8778	103.183	20.2305	3	30
F4	AF023C	Kinase F1/R1 + probe	UNKNOWN	FAM	32.7131	32.943	0.325126	117.488			3	30
G4	AF023D	Kinase F1/R1 + probe	UNKNOWN	FAM	29.5658	29.7105	0.204575	793.576	729.675	90.3693	3	26
H4	AF023D	Kinase F1/R1 + probe	UNKNOWN	FAM	29.8551	29.7105	0.204575	665.774			3	27
A22	AF024A	Kinase F1/R1 + probe	UNKNOWN	FAM	33.6543	33.814	0.225753	66.3557	60.5112	8.26541	3	30
B22	AF024A	Kinase F1/R1 + probe	UNKNOWN	FAM	33.9736	33.814	0.225753	54.6667			3	31
C22	AF024B	Kinase F1/R1 + probe	UNKNOWN	FAM	29.7836	29.8767	0.131684	695.328	658.17	52.5486	3	27
D22	AF024B	Kinase F1/R1 + probe	UNKNOWN	FAM	29.9698	29.8767	0.131684	621.013			3	27
E22	AF024C	Kinase F1/R1 + probe	UNKNOWN	FAM	31.4594	31.86	0.566548	251.458	203.039	68.4742	3	28
F22	AF024C	Kinase F1/R1 + probe	UNKNOWN	FAM	32.2606	31.86	0.566548	154.621			3	29
G22	AF024D	Kinase F1/R1 + probe	UNKNOWN	FAM	28.6622	28.8006	0.195837	1373.38	1267.13	150.262	3	26
H22	AF024D	Kinase F1/R1 + probe	UNKNOWN	FAM	28.9391	28.8006	0.195837	1160.88			3	26
I22	AF025A	Kinase F1/R1 + probe	UNKNOWN	FAM	37.7616	36.6484	1.57435	5.4855	13.337	11.1037	3	35
J22	AF025A	Kinase F1/R1 + probe	UNKNOWN	FAM	35.5352	36.6484	1.57435	21.1886			3	32
K22	AF025B	Kinase F1/R1 + probe	UNKNOWN	FAM	29.6184	29.8565	0.336777	768.663	672.179	136.449	3	26
L22	AF025B	Kinase F1/R1 + probe	UNKNOWN	FAM	30.0947	29.8565	0.336777	575.695			3	27
M22	AF025C	Kinase F1/R1 + probe	UNKNOWN	FAM	24.4301	24.4785	0.0684424	17919.7	17408.5	722.965	3	21
N22	AF025C	Kinase F1/R1 + probe	UNKNOWN	FAM	24.5269	24.4785	0.0684424	16897.3			3	21
O22	AF025D	Kinase F1/R1 + probe	UNKNOWN	FAM	18.5379	18.8001	0.370852	640464	553159	123469	3	15
P22	AF025D	Kinase F1/R1 + probe	UNKNOWN	FAM	19.0624	18.8001	0.370852	465853			3	16
A23	AF026A	Kinase F1/R1 + probe	UNKNOWN	FAM	34.2871	34.8327	0.771556	45.1949	34.2505	15.4777	3	31
B23	AF026A	Kinase F1/R1 + probe	UNKNOWN	FAM	35.3782	34.8327	0.771556	23.3061			3	32
C23	AF026B	Kinase F1/R1 + probe	UNKNOWN	FAM	28.5723	28.8138	0.341514	1450.36	1266.1	260.577	3	25
D23	AF026B	Kinase F1/R1 + probe	UNKNOWN	FAM	29.0553	28.8138	0.341514	1081.85			3	26
E23	AF026C	Kinase F1/R1 + probe	UNKNOWN	FAM	29.8957	29.8939	0.00260973	649.577	650.305	1.02987	3	27
F23	AF026C	Kinase F1/R1 + probe	UNKNOWN	FAM	29.892	29.8939	0.00260973	651.034			3	27
G23	AF026D	Kinase F1/R1 + probe	UNKNOWN	FAM	35.0294	35.1696	0.198159	28.8011	26.5487	3.18541	3	32
H23	AF026D	Kinase F1/R1 + probe	UNKNOWN	FAM	35.3097	35.1696	0.198159	24.2962			3	32
I4	AF029A	Kinase F1/R1 + probe	UNKNOWN	FAM	25.0908	25.0548	0.0509512	12000.2	12268.4	379.338	3	22
J4	AF029A	Kinase F1/R1 + probe	UNKNOWN	FAM	25.0187	25.0548	0.0509512	12536.6			3	22
K4	AF029B	Kinase F1/R1 + probe	UNKNOWN	FAM	31.3125	31.3202	0.0108988	274.9	273.62	1.80996	3	28
L4	AF029B	Kinase F1/R1 + probe	UNKNOWN	FAM	31.3279	31.3202	0.0108988	272.34			3	28
M4	AF029C	Kinase F1/R1 + probe	UNKNOWN	FAM	31.6821	31.2997	0.540846	219.658	284.545	91.7645	3	29
N4	AF029C	Kinase F1/R1 + probe	UNKNOWN	FAM	30.9172	31.2997	0.540846	349.433			3	28
O4	AF029D	Kinase F1/R1 + probe	UNKNOWN	FAM	Undetermined			#VALUE!	#VALUE!	#VALUE!	3	39
P4	AF029D	Kinase F1/R1 + probe	UNKNOWN	FAM	Undetermined			#VALUE!			3	39
A5	AF030A	Kinase F1/R1 + probe	UNKNOWN	FAM	33.1167	33.6806	0.797456	91.96	69.1696	32.2305	3	30
B5	AF030A	Kinase F1/R1 + probe	UNKNOWN	FAM	34.2445	33.6806	0.797456	46.3792			3	31
C5	AF030B	Kinase F1/R1 + probe	UNKNOWN	FAM	26.5909	27.0025	0.58208	4827.84	3878.57	1342.46	3	23
D5	AF030B	Kinase F1/R1 + probe	UNKNOWN	FAM	27.4141	27.0025	0.58208	2929.31			3	24
E5	AF030C	Kinase F1/R1 + probe	UNKNOWN	FAM	25.1343	25.0866	0.0673797	11687.6	12035.6	492.069	3	22
F5	AF030C	Kinase F1/R1 + probe	UNKNOWN	FAM	25.039	25.0866	0.0673797	12383.5			3	22
G5	AF030D	Kinase F1/R1 + probe	UNKNOWN	FAM	35.7099	35.5122	0.279604	19.0559	21.6404	3.65497	3	32
H5	AF030D	Kinase F1/R1 + probe	UNKNOWN	FAM	35.3145	35.5122	0.279604	24.2248			3	32
I5	AF033A	Kinase F1/R1 + probe	UNKNOWN	FAM	18.0618	18.3617	0.424223	855073	724588	184534	3	15
J5	AF033A	Kinase F1/R1 + probe	UNKNOWN	FAM	18.6617	18.3617	0.424223	594103			3	16
K5	AF033B	Kinase F1/R1 + probe	UNKNOWN	FAM	15.6851	16.304	0.875265	3.61807e+06	2.66246e+06	1.35143e+06	3	14
L5	AF033B	Kinase F1/R1 + probe	UNKNOWN	FAM	16.9229	16.304	0.875265	1.70685e+06			3	14
M5	AF033C	Kinase F1/R1 + probe	UNKNOWN	FAM	16.6032	16.8102	0.292753	2.07244e+06	1.84219e+06	325620	3	13
N5	AF033C	Kinase F1/R1 + probe	UNKNOWN	FAM	17.0172	16.8102	0.292753	1.61194e+06			3	14
O5	AF033D	Kinase F1/R1 + probe	UNKNOWN	FAM	16.8876	17.1357	0.350797	1.74383e+06	1.51713e+06	320603	3	13
P5	AF033D	Kinase F1/R1 + probe	UNKNOWN	FAM	17.3837	17.1357	0.350797	1.29043e+06			3	14
I23	AF035A	Kinase F1/R1 + probe	UNKNOWN	FAM	31.6087	31.5311	0.109784	229.666	241.013	16.0477	3	28
J23	AF035A	Kinase F1/R1 + probe	UNKNOWN	FAM	31.4535	31.5311	0.109784	252.361			3	28
K23	AF035B	Kinase F1/R1 + probe	UNKNOWN	FAM	31.7329	32.198	0.657747	212.992	167.049	64.9725	3	28
L23	AF035B	Kinase F1/R1 + probe	UNKNOWN	FAM	32.6631	32.198	0.657747	121.107			3	29
M23	AF035C	Kinase F1/R1 + probe	UNKNOWN	FAM	22.8183	22.9614	0.20238	47666.5	43866	5374.75	3	20
N23	AF035C	Kinase F1/R1 + probe	UNKNOWN	FAM	23.1045	22.9614	0.20238	40065.5			3	20
O23	AF035D	Kinase F1/R1 + probe	UNKNOWN	FAM	21.8774	21.9695	0.130279	84377.5	79914	6312.43	3	19
P23	AF035D	Kinase F1/R1 + probe	UNKNOWN	FAM	22.0616	21.9695	0.130279	75450.4			3	19
A6	AF038A	Kinase F1/R1 + probe	UNKNOWN	FAM	37.2611	37.0204	0.340385	7.43301	8.69414	1.78351	3	34
B6	AF038A	Kinase F1/R1 + probe	UNKNOWN	FAM	36.7797	37.0204	0.340385	9.95527			3	33
C6	AF038B	Kinase F1/R1 + probe	UNKNOWN	FAM	Undetermined	37.5758		#VALUE!	#VALUE!	#VALUE!	3	39
D6	AF038B	Kinase F1/R1 + probe	UNKNOWN	FAM	37.5758	37.5758		6.14038			3	34
E6	AF038C	Kinase F1/R1 + probe	UNKNOWN	FAM	35.776	35.776		18.3068	#VALUE!	#VALUE!	3	32
F6	AF038C	Kinase F1/R1 + probe	UNKNOWN	FAM	Undetermined	35.776		#VALUE!			3	39
G6	AF038D	Kinase F1/R1 + probe	UNKNOWN	FAM	34.5829	34.8755	0.413835	37.7673	32.1214	7.98439	3	31
H6	AF038D	Kinase F1/R1 + probe	UNKNOWN	FAM	35.1681	34.8755	0.413835	26.4756			3	32
I6	AF044A	Kinase F1/R1 + probe	UNKNOWN	FAM	Undetermined	36.0745		#VALUE!	#VALUE!	#VALUE!	3	39
J6	AF044A	Kinase F1/R1 + probe	UNKNOWN	FAM	36.0745	36.0745		15.2738			3	33
K6	AF044B	Kinase F1/R1 + probe	UNKNOWN	FAM	35.4075	35.2575	0.212075	22.8962	25.1819	3.23246	3	32
L6	AF044B	Kinase F1/R1 + probe	UNKNOWN	FAM	35.1075	35.2575	0.212075	27.4676			3	32
M6	AF044C	Kinase F1/R1 + probe	UNKNOWN	FAM	35.45	35.3073	0.201892	22.3123	24.4232	2.98529	3	32
N6	AF044C	Kinase F1/R1 + probe	UNKNOWN	FAM	35.1645	35.3073	0.201892	26.5341			3	32
O6	AF044D	Kinase F1/R1 + probe	UNKNOWN	FAM	32.2246	32.0013	0.315811	158.034	182.638	34.7954	3	29
P6	AF044D	Kinase F1/R1 + probe	UNKNOWN	FAM	31.778	32.0013	0.315811	207.242			3	29
A7	AF046A	Kinase F1/R1 + probe	UNKNOWN	FAM	Undetermined	37.6859		#VALUE!	#VALUE!	#VALUE!	3	39
B7	AF046A	Kinase F1/R1 + probe	UNKNOWN	FAM	37.6859	37.6859		5.74344			3	34
C7	AF046B	Kinase F1/R1 + probe	UNKNOWN	FAM	31.9465	32.5212	0.812718	187.092	140.111	66.4409	3	29
D7	AF046B	Kinase F1/R1 + probe	UNKNOWN	FAM	33.0959	32.5212	0.812718	93.1301			3	30
E7	AF046C	Kinase F1/R1 + probe	UNKNOWN	FAM	Undetermined			#VALUE!	#VALUE!	#VALUE!	3	39
F7	AF046C	Kinase F1/R1 + probe	UNKNOWN	FAM	Undetermined			#VALUE!			3	39
G7	AF046D	Kinase F1/R1 + probe	UNKNOWN	FAM	37.011	36.5371	0.670217	8.65124	12.015	4.75708	3	34
H7	AF046D	Kinase F1/R1 + probe	UNKNOWN	FAM	36.0632	36.5371	0.670217	15.3788			3	33
I7	AF047A	Kinase F1/R1 + probe	UNKNOWN	FAM	Undetermined			#VALUE!	#VALUE!	#VALUE!	3	39
J7	AF047A	Kinase F1/R1 + probe	UNKNOWN	FAM	Undetermined			#VALUE!			3	35
K7	AF047B	Kinase F1/R1 + probe	UNKNOWN	FAM	Undetermined			#VALUE!	#VALUE!	#VALUE!	3	39
L7	AF047B	Kinase F1/R1 + probe	UNKNOWN	FAM	Undetermined			#VALUE!			3	39
M7	AF047C	Kinase F1/R1 + probe	UNKNOWN	FAM	36.6061	36.6484	0.0597285	11.061	10.7846	0.390887	3	33
N7	AF047C	Kinase F1/R1 + probe	UNKNOWN	FAM	36.6906	36.6484	0.0597285	10.5083			3	33
O7	AF047D	Kinase F1/R1 + probe	UNKNOWN	FAM	Undetermined			#VALUE!	#VALUE!	#VALUE!	3	39
P7	AF047D	Kinase F1/R1 + probe	UNKNOWN	FAM	Undetermined			#VALUE!			3	39
A8	AF049A	Kinase F1/R1 + probe	UNKNOWN	FAM	18.1169	18.4519	0.473818	826936	688772	195394	3	15
B8	AF049A	Kinase F1/R1 + probe	UNKNOWN	FAM	18.787	18.4519	0.473818	550608			3	15
C8	AF049B	Kinase F1/R1 + probe	UNKNOWN	FAM	17.7104	18.2166	0.715925	1.05832e+06	815382	343564	3	14
D8	AF049B	Kinase F1/R1 + probe	UNKNOWN	FAM	18.7229	18.2166	0.715925	572446			3	15
E8	AF049C	Kinase F1/R1 + probe	UNKNOWN	FAM	16.6849	17.3264	0.907304	1.97219e+06	1.43867e+06	754505	3	13
F8	AF049C	Kinase F1/R1 + probe	UNKNOWN	FAM	17.968	17.3264	0.907304	905158			3	15
G8	AF049D	Kinase F1/R1 + probe	UNKNOWN	FAM	17.3222	17.9405	0.874292	1.33948e+06	985959	499954	3	14
H8	AF049D	Kinase F1/R1 + probe	UNKNOWN	FAM	18.5587	17.9405	0.874292	632438			3	15
I8	AF050A	Kinase F1/R1 + probe	UNKNOWN	FAM	36.8109	36.7418	0.0977267	9.7685	10.1959	0.604415	3	34
J8	AF050A	Kinase F1/R1 + probe	UNKNOWN	FAM	36.6727	36.7418	0.0977267	10.6233			3	33
K8	AF050B	Kinase F1/R1 + probe	UNKNOWN	FAM	36.6186	36.6186		10.9777	#VALUE!	#VALUE!	3	34
L8	AF050B	Kinase F1/R1 + probe	UNKNOWN	FAM	Undetermined	36.6186		#VALUE!			3	39
M8	AF050C	Kinase F1/R1 + probe	UNKNOWN	FAM	Undetermined			#VALUE!	#VALUE!	#VALUE!	3	39
N8	AF050C	Kinase F1/R1 + probe	UNKNOWN	FAM	Undetermined			#VALUE!			3	39
O8	AF050D	Kinase F1/R1 + probe	UNKNOWN	FAM	38.6752	38.6752		3.15061	#VALUE!	#VALUE!	3	35
P8	AF050D	Kinase F1/R1 + probe	UNKNOWN	FAM	Undetermined	38.6752		#VALUE!			3	39
A9	AF053A	Kinase F1/R1 + probe	UNKNOWN	FAM	36.1616	35.7607	0.566972	14.4871	19.0279	6.4217	3	33
B9	AF053A	Kinase F1/R1 + probe	UNKNOWN	FAM	35.3598	35.7607	0.566972	23.5687			3	32
C9	AF053B	Kinase F1/R1 + probe	UNKNOWN	FAM	32.7941	33.3222	0.746799	111.849	85.3827	37.4284	3	30
D9	AF053B	Kinase F1/R1 + probe	UNKNOWN	FAM	33.8502	33.3222	0.746799	58.9168			3	31
E9	AF053C	Kinase F1/R1 + probe	UNKNOWN	FAM	34.3857	34.1853	0.283324	42.5702	48.4303	8.28747	3	31
F9	AF053C	Kinase F1/R1 + probe	UNKNOWN	FAM	33.985	34.1853	0.283324	54.2904			3	30
G9	AF053D	Kinase F1/R1 + probe	UNKNOWN	FAM	36.8269	36.4539	0.527557	9.6738	12.4442	3.91792	3	34
H9	AF053D	Kinase F1/R1 + probe	UNKNOWN	FAM	36.0809	36.4539	0.527557	15.2146			3	33
I9	AF055A	Kinase F1/R1 + probe	UNKNOWN	FAM	32.4216	32.4407	0.0270549	140.227	138.617	2.27611	3	29
J9	AF055A	Kinase F1/R1 + probe	UNKNOWN	FAM	32.4598	32.4407	0.0270549	137.008			3	29
K9	AF055B	Kinase F1/R1 + probe	UNKNOWN	FAM	37.5784	37.5784		6.1308	#VALUE!	#VALUE!	3	34
L9	AF055B	Kinase F1/R1 + probe	UNKNOWN	FAM	Undetermined	37.5784		#VALUE!			3	39
M9	AF055C	Kinase F1/R1 + probe	UNKNOWN	FAM	33.925	33.9206	0.00631461	56.3021	56.4551	0.216392	3	30
N9	AF055C	Kinase F1/R1 + probe	UNKNOWN	FAM	33.9161	33.9206	0.00631461	56.6082			3	31
O9	AF055D	Kinase F1/R1 + probe	UNKNOWN	FAM	35.0191	34.7237	0.417832	28.9819	35.2333	8.8407	3	31
P9	AF055D	Kinase F1/R1 + probe	UNKNOWN	FAM	34.4282	34.7237	0.417832	41.4846			3	31
A10	AF057A	Kinase F1/R1 + probe	UNKNOWN	FAM	37.7874	37.8432	0.0789232	5.40031	5.22345	0.25012	3	35
B10	AF057A	Kinase F1/R1 + probe	UNKNOWN	FAM	37.899	37.8432	0.0789232	5.04659			3	35
C10	AF057B	Kinase F1/R1 + probe	UNKNOWN	FAM	32.0615	33.1453	1.53274	174.476	110.644	90.2717	3	29
D10	AF057B	Kinase F1/R1 + probe	UNKNOWN	FAM	34.2292	33.1453	1.53274	46.8123			3	31
E10	AF057C	Kinase F1/R1 + probe	UNKNOWN	FAM	Undetermined	36.1168		#VALUE!	#VALUE!	#VALUE!	3	39
F10	AF057C	Kinase F1/R1 + probe	UNKNOWN	FAM	36.1168	36.1168		14.8864			3	33
G10	AF057D	Kinase F1/R1 + probe	UNKNOWN	FAM	35.7003	36.0505	0.495283	19.1679	15.8488	4.69385	3	32
H10	AF057D	Kinase F1/R1 + probe	UNKNOWN	FAM	36.4007	36.0505	0.495283	12.5298			3	33
I10	AF058A	Kinase F1/R1 + probe	UNKNOWN	FAM	Undetermined			#VALUE!	#VALUE!	#VALUE!	3	39
J10	AF058A	Kinase F1/R1 + probe	UNKNOWN	FAM	Undetermined			#VALUE!			3	39
K10	AF058B	Kinase F1/R1 + probe	UNKNOWN	FAM	35.46	36.0312	0.807682	22.177	16.6321	7.84181	3	32
L10	AF058B	Kinase F1/R1 + probe	UNKNOWN	FAM	36.6023	36.0312	0.807682	11.0871			3	33
M10	AF058C	Kinase F1/R1 + probe	UNKNOWN	FAM	38.4886	38.0591	0.607454	3.52854	4.73601	1.70763	3	35
N10	AF058C	Kinase F1/R1 + probe	UNKNOWN	FAM	37.6295	38.0591	0.607454	5.94349			3	34
O10	AF058D	Kinase F1/R1 + probe	UNKNOWN	FAM	33.7142	34.5786	1.22242	63.9864	43.197	29.4007	3	30
P10	AF058D	Kinase F1/R1 + probe	UNKNOWN	FAM	35.443	34.5786	1.22242	22.4075			3	32
A11	AF062A	Kinase F1/R1 + probe	UNKNOWN	FAM	21.981	22.217	0.33379	79234.6	69365.1	13957.6	3	19
B11	AF062A	Kinase F1/R1 + probe	UNKNOWN	FAM	22.453	22.217	0.33379	59495.7			3	19
C11	AF062B	Kinase F1/R1 + probe	UNKNOWN	FAM	37.3277	36.4753	1.20538	7.13848	13.6135	9.157	3	34
D11	AF062B	Kinase F1/R1 + probe	UNKNOWN	FAM	35.623	36.4753	1.20538	20.0884			3	32
E11	AF062C	Kinase F1/R1 + probe	UNKNOWN	FAM	18.8029	19.1998	0.561345	545312	441062	147432	3	16
F11	AF062C	Kinase F1/R1 + probe	UNKNOWN	FAM	19.5968	19.1998	0.561345	336812			3	16
G11	AF062D	Kinase F1/R1 + probe	UNKNOWN	FAM	20.2174	21.1823	1.36458	231090	151360	112756	3	17
H11	AF062D	Kinase F1/R1 + probe	UNKNOWN	FAM	22.1472	21.1823	1.36458	71629.5			3	19
I11	AF063A	Kinase F1/R1 + probe	UNKNOWN	FAM	35.6555	36.3622	0.999427	19.6966	14.0246	8.02136	3	32
J11	AF063A	Kinase F1/R1 + probe	UNKNOWN	FAM	37.0689	36.3622	0.999427	8.35266			3	34
K11	AF063B	Kinase F1/R1 + probe	UNKNOWN	FAM	16.7961	17.4702	0.953391	1.84345e+06	1.32835e+06	728459	3	15
L11	AF063B	Kinase F1/R1 + probe	UNKNOWN	FAM	18.1444	17.4702	0.953391	813256			3	15
M11	AF063C	Kinase F1/R1 + probe	UNKNOWN	FAM	19.5483	19.8098	0.369778	346856	299690	66702.3	3	16
N11	AF063C	Kinase F1/R1 + probe	UNKNOWN	FAM	20.0713	19.8098	0.369778	252524			3	17
O11	AF063D	Kinase F1/R1 + probe	UNKNOWN	FAM	15.7655	16.3917	0.885679	3.44586e+06	2.5285e+06	1.29734e+06	3	12
P11	AF063D	Kinase F1/R1 + probe	UNKNOWN	FAM	17.018	16.3917	0.885679	1.61114e+06			3	14
A12	AF065A	Kinase F1/R1 + probe	UNKNOWN	FAM	38.2617	37.3518	1.28678	4.04949	8.13496	5.77773	3	35
B12	AF065A	Kinase F1/R1 + probe	UNKNOWN	FAM	36.4419	37.3518	1.28678	12.2204			3	33
C12	AF065B	Kinase F1/R1 + probe	UNKNOWN	FAM	30.7864	30.9002	0.160952	378.322	353.913	34.5189	3	28
D12	AF065B	Kinase F1/R1 + probe	UNKNOWN	FAM	31.014	30.9002	0.160952	329.505			3	28
E12	AF065C	Kinase F1/R1 + probe	UNKNOWN	FAM	18.0783	18.163	0.119738	846515	805174	58464.2	3	15
F12	AF065C	Kinase F1/R1 + probe	UNKNOWN	FAM	18.2477	18.163	0.119738	763834			3	15
G12	AF065D	Kinase F1/R1 + probe	UNKNOWN	FAM	17.8537	17.925	0.100918	970184	929932	56924.5	3	14
H12	AF065D	Kinase F1/R1 + probe	UNKNOWN	FAM	17.9964	17.925	0.100918	889680			3	15
I12	AF067A	Kinase F1/R1 + probe	UNKNOWN	FAM	36.7584	36.7584		10.0849	#VALUE!	#VALUE!	3	34
J12	AF067A	Kinase F1/R1 + probe	UNKNOWN	FAM	Undetermined	36.7584		#VALUE!			3	39
K12	AF067B	Kinase F1/R1 + probe	UNKNOWN	FAM	33.6108	34.2126	0.851056	68.1332	50.4753	24.9721	3	30
L12	AF067B	Kinase F1/R1 + probe	UNKNOWN	FAM	34.8144	34.2126	0.851056	32.8173			3	31
M12	AF067C	Kinase F1/R1 + probe	UNKNOWN	FAM	33.1762	33.5676	0.553404	88.6956	71.9266	23.715	3	30
N12	AF067C	Kinase F1/R1 + probe	UNKNOWN	FAM	33.9589	33.5676	0.553404	55.1575			3	31
O12	AF067D	Kinase F1/R1 + probe	UNKNOWN	FAM	31.9382	32.2878	0.494468	188.038	155.521	45.986	3	29
P12	AF067D	Kinase F1/R1 + probe	UNKNOWN	FAM	32.6375	32.2878	0.494468	123.004			3	29
A13	AF068A	Kinase F1/R1 + probe	UNKNOWN	FAM	35.3998	35.3868	0.0183234	23.0033	23.1856	0.257848	3	32
B13	AF068A	Kinase F1/R1 + probe	UNKNOWN	FAM	35.3739	35.3868	0.0183234	23.3679			3	32
C13	AF068B	Kinase F1/R1 + probe	UNKNOWN	FAM	Undetermined			#VALUE!	#VALUE!	#VALUE!	3	39
D13	AF068B	Kinase F1/R1 + probe	UNKNOWN	FAM	Undetermined			#VALUE!			3	39
E13	AF068C	Kinase F1/R1 + probe	UNKNOWN	FAM	35.0801	35.9303	1.20234	27.9283	18.9393	12.7124	3	32
F13	AF068C	Kinase F1/R1 + probe	UNKNOWN	FAM	36.7805	35.9303	1.20234	9.95032			3	34
G13	AF068D	Kinase F1/R1 + probe	UNKNOWN	FAM	36.7946	37.7031	1.2848	9.86574	6.57026	4.66051	3	34
H13	AF068D	Kinase F1/R1 + probe	UNKNOWN	FAM	38.6116	37.7031	1.2848	3.27479			3	35
I13	AF070A	Kinase F1/R1 + probe	UNKNOWN	FAM	Undetermined			#VALUE!	#VALUE!	#VALUE!	3	39
J13	AF070A	Kinase F1/R1 + probe	UNKNOWN	FAM	Undetermined			#VALUE!			3	39
K13	AF070B	Kinase F1/R1 + probe	UNKNOWN	FAM	Undetermined	37.5653		#VALUE!	#VALUE!	#VALUE!	3	39
L13	AF070B	Kinase F1/R1 + probe	UNKNOWN	FAM	37.5653	37.5653		6.1799			3	34
M13	AF070C	Kinase F1/R1 + probe	UNKNOWN	FAM	35.1346	34.2281	1.28201	27.0199	54.1131	38.3156	3	32
N13	AF070C	Kinase F1/R1 + probe	UNKNOWN	FAM	33.3216	34.2281	1.28201	81.2063			3	30
O13	AF070D	Kinase F1/R1 + probe	UNKNOWN	FAM	Undetermined			#VALUE!	#VALUE!	#VALUE!	3	39
P13	AF070D	Kinase F1/R1 + probe	UNKNOWN	FAM	Undetermined			#VALUE!			3	39
A14	AF075A	Kinase F1/R1 + probe	UNKNOWN	FAM	Undetermined	36.1829		#VALUE!	#VALUE!	#VALUE!	3	39
B14	AF075A	Kinase F1/R1 + probe	UNKNOWN	FAM	36.1829	36.1829		14.3008			3	33
C14	AF075B	Kinase F1/R1 + probe	UNKNOWN	FAM	35.8907	36.8243	1.32031	17.0755	11.2867	8.18667	3	33
D14	AF075B	Kinase F1/R1 + probe	UNKNOWN	FAM	37.7579	36.8243	1.32031	5.49782			3	35
E14	AF075C	Kinase F1/R1 + probe	UNKNOWN	FAM	35.1626	35.2971	0.190204	26.5654	24.5646	2.82957	3	32
F14	AF075C	Kinase F1/R1 + probe	UNKNOWN	FAM	35.4316	35.2971	0.190204	22.5638			3	32
G14	AF075D	Kinase F1/R1 + probe	UNKNOWN	FAM	Undetermined			#VALUE!	#VALUE!	#VALUE!	3	39
H14	AF075D	Kinase F1/R1 + probe	UNKNOWN	FAM	Undetermined			#VALUE!			3	39
I14	AF078A	Kinase F1/R1 + probe	UNKNOWN	FAM	36.0186	35.871	0.208625	15.8009	17.3502	2.19112	3	33
J14	AF078A	Kinase F1/R1 + probe	UNKNOWN	FAM	35.7235	35.871	0.208625	18.8996			3	32
K14	AF078B	Kinase F1/R1 + probe	UNKNOWN	FAM	Undetermined			#VALUE!	#VALUE!	#VALUE!	3	39
L14	AF078B	Kinase F1/R1 + probe	UNKNOWN	FAM	Undetermined			#VALUE!			3	39
M14	AF078C	Kinase F1/R1 + probe	UNKNOWN	FAM	36.2681	35.8696	0.563616	13.5799	17.8046	5.97464	3	33
N14	AF078C	Kinase F1/R1 + probe	UNKNOWN	FAM	35.4711	35.8696	0.563616	22.0293			3	32
O14	AF078D	Kinase F1/R1 + probe	UNKNOWN	FAM	16.2079	16.1268	0.114627	2.63437e+06	2.77056e+06	192600	3	13
P14	AF078D	Kinase F1/R1 + probe	UNKNOWN	FAM	16.0458	16.1268	0.114627	2.90675e+06			3	13
A15	AF084A	Kinase F1/R1 + probe	UNKNOWN	FAM	35.5863	35.3476	0.337528	20.5411	23.9926	4.88108	3	32
B15	AF084A	Kinase F1/R1 + probe	UNKNOWN	FAM	35.109	35.3476	0.337528	27.444			3	32
C15	AF084B	Kinase F1/R1 + probe	UNKNOWN	FAM	39.3128	39.3128		2.13965	#VALUE!	#VALUE!	3	35
D15	AF084B	Kinase F1/R1 + probe	UNKNOWN	FAM	Undetermined	39.3128		#VALUE!			3	39
E15	AF084C	Kinase F1/R1 + probe	UNKNOWN	FAM	30.6484	30.7338	0.12085	411.373	391.106	28.6618	3	28
F15	AF084C	Kinase F1/R1 + probe	UNKNOWN	FAM	30.8193	30.7338	0.12085	370.839			3	27
G15	AF084D	Kinase F1/R1 + probe	UNKNOWN	FAM	21.101	21.1788	0.110021	135167	129077	8613.04	3	18
H15	AF084D	Kinase F1/R1 + probe	UNKNOWN	FAM	21.2566	21.1788	0.110021	122987			3	18
I15	AF085A	Kinase F1/R1 + probe	UNKNOWN	FAM	37.4446	37.4446		6.64932	#VALUE!	#VALUE!	3	34
J15	AF085A	Kinase F1/R1 + probe	UNKNOWN	FAM	Undetermined	37.4446		#VALUE!			3	39
K15	AF085B	Kinase F1/R1 + probe	UNKNOWN	FAM	26.8196	27.1285	0.436832	4202.28	3545.29	929.12	3	24
L15	AF085B	Kinase F1/R1 + probe	UNKNOWN	FAM	27.4374	27.1285	0.436832	2888.3			3	24
M15	AF085C	Kinase F1/R1 + probe	UNKNOWN	FAM	29.8278	30.1227	0.417154	676.93	575.061	144.065	3	27
N15	AF085C	Kinase F1/R1 + probe	UNKNOWN	FAM	30.4177	30.1227	0.417154	473.192			3	27
O15	AF085D	Kinase F1/R1 + probe	UNKNOWN	FAM	19.0048	19.2797	0.388879	482430	413973	96812.7	3	16
P15	AF085D	Kinase F1/R1 + probe	UNKNOWN	FAM	19.5547	19.2797	0.388879	345516			3	17
A16	AF087A	Kinase F1/R1 + probe	UNKNOWN	FAM	Undetermined			#VALUE!	#VALUE!	#VALUE!	3	39
B16	AF087A	Kinase F1/R1 + probe	UNKNOWN	FAM	Undetermined			#VALUE!			3	39
C16	AF087B	Kinase F1/R1 + probe	UNKNOWN	FAM	34.5698	34.7352	0.234005	38.0695	34.6057	4.89857	3	31
D16	AF087B	Kinase F1/R1 + probe	UNKNOWN	FAM	34.9007	34.7352	0.234005	31.1419			3	32
E16	AF087C	Kinase F1/R1 + probe	UNKNOWN	FAM	33.4655	34.0449	0.819321	74.4135	55.6228	26.5741	3	30
F16	AF087C	Kinase F1/R1 + probe	UNKNOWN	FAM	34.6242	34.0449	0.819321	36.832			3	31
G16	AF087D	Kinase F1/R1 + probe	UNKNOWN	FAM	36.6703	36.6703		10.6388	#VALUE!	#VALUE!	3	33
H16	AF087D	Kinase F1/R1 + probe	UNKNOWN	FAM	Undetermined	36.6703		#VALUE!			3	39
I16	AF090A	Kinase F1/R1 + probe	UNKNOWN	FAM	33.7767	35.144	1.93363	61.6054	36.661	35.2767	3	30
J16	AF090A	Kinase F1/R1 + probe	UNKNOWN	FAM	36.5113	35.144	1.93363	11.7166			3	33
K16	AF090B	Kinase F1/R1 + probe	UNKNOWN	FAM	Undetermined	37.6521		#VALUE!	#VALUE!	#VALUE!	3	39
L16	AF090B	Kinase F1/R1 + probe	UNKNOWN	FAM	37.6521	37.6521		5.86246			3	34
M16	AF090C	Kinase F1/R1 + probe	UNKNOWN	FAM	33.4584	33.8418	0.542147	74.7334	60.8297	19.6628	3	30
N16	AF090C	Kinase F1/R1 + probe	UNKNOWN	FAM	34.2252	33.8418	0.542147	46.926			3	31
O16	AF090D	Kinase F1/R1 + probe	UNKNOWN	FAM	Undetermined			#VALUE!	#VALUE!	#VALUE!	3	39
P16	AF090D	Kinase F1/R1 + probe	UNKNOWN	FAM	Undetermined			#VALUE!			3	39
A17	AF092A	Kinase F1/R1 + probe	UNKNOWN	FAM	Undetermined			#VALUE!	#VALUE!	#VALUE!	3	39
B17	AF092A	Kinase F1/R1 + probe	UNKNOWN	FAM	Undetermined			#VALUE!			3	39
C17	AF092B	Kinase F1/R1 + probe	UNKNOWN	FAM	31.2526	31.2934	0.0576353	285.079	278.199	9.72981	3	28
D17	AF092B	Kinase F1/R1 + probe	UNKNOWN	FAM	31.3341	31.2934	0.0576353	271.319			3	28
E17	AF092C	Kinase F1/R1 + probe	UNKNOWN	FAM	Undetermined			#VALUE!	#VALUE!	#VALUE!	3	39
F17	AF092C	Kinase F1/R1 + probe	UNKNOWN	FAM	Undetermined			#VALUE!			3	39
G17	AF092D	Kinase F1/R1 + probe	UNKNOWN	FAM	33.7078	33.2795	0.605725	64.2356	86.137	30.9732	3	31
H17	AF092D	Kinase F1/R1 + probe	UNKNOWN	FAM	32.8512	33.2795	0.605725	108.038			3	30
I17	AF093A	Kinase F1/R1 + probe	UNKNOWN	FAM	Undetermined			#VALUE!	#VALUE!	#VALUE!	3	39
J17	AF093A	Kinase F1/R1 + probe	UNKNOWN	FAM	Undetermined			#VALUE!			3	39
K17	AF093B	Kinase F1/R1 + probe	UNKNOWN	FAM	Undetermined			#VALUE!	#VALUE!	#VALUE!	3	39
L17	AF093B	Kinase F1/R1 + probe	UNKNOWN	FAM	Undetermined			#VALUE!			3	39
M17	AF093C	Kinase F1/R1 + probe	UNKNOWN	FAM	36.182	35.2766	1.28048	14.3083	28.6273	20.2501	3	33
N17	AF093C	Kinase F1/R1 + probe	UNKNOWN	FAM	34.3712	35.2766	1.28048	42.9463			3	31
O17	AF093D	Kinase F1/R1 + probe	UNKNOWN	FAM	35.0477	34.5476	0.707123	28.4844	40.3745	16.8152	3	32
P17	AF093D	Kinase F1/R1 + probe	UNKNOWN	FAM	34.0476	34.5476	0.707123	52.2647			3	31
A18	AF094A	Kinase F1/R1 + probe	UNKNOWN	FAM	35.5967	35.5967		20.412	#VALUE!	#VALUE!	3	32
B18	AF094A	Kinase F1/R1 + probe	UNKNOWN	FAM	Undetermined	35.5967		#VALUE!			3	39
C18	AF094B	Kinase F1/R1 + probe	UNKNOWN	FAM	Undetermined			#VALUE!	#VALUE!	#VALUE!	3	39
D18	AF094B	Kinase F1/R1 + probe	UNKNOWN	FAM	Undetermined			#VALUE!			3	39
E18	AF094C	Kinase F1/R1 + probe	UNKNOWN	FAM	Undetermined	36.8951		#VALUE!	#VALUE!	#VALUE!	3	39
F18	AF094C	Kinase F1/R1 + probe	UNKNOWN	FAM	36.8951	36.8951		9.28199			3	34
G18	AF094D	Kinase F1/R1 + probe	UNKNOWN	FAM	34.3421	34.6336	0.412257	43.7109	37.1973	9.21158	3	31
H18	AF094D	Kinase F1/R1 + probe	UNKNOWN	FAM	34.9251	34.6336	0.412257	30.6838			3	32
I18	AF103A	Kinase F1/R1 + probe	UNKNOWN	FAM	36.7996	37.3457	0.772198	9.83537	7.45224	3.37025	3	33
J18	AF103A	Kinase F1/R1 + probe	UNKNOWN	FAM	37.8917	37.3457	0.772198	5.06911			3	35
K18	AF103B	Kinase F1/R1 + probe	UNKNOWN	FAM	Undetermined	38.3527		#VALUE!	#VALUE!	#VALUE!	3	39
L18	AF103B	Kinase F1/R1 + probe	UNKNOWN	FAM	38.3527	38.3527		3.83193			3	35
M18	AF103C	Kinase F1/R1 + probe	UNKNOWN	FAM	33.9874	33.8398	0.208768	54.2101	59.5297	7.52299	3	31
N18	AF103C	Kinase F1/R1 + probe	UNKNOWN	FAM	33.6922	33.8398	0.208768	64.8492			3	30
O18	AF103D	Kinase F1/R1 + probe	UNKNOWN	FAM	31.409	31.1014	0.434966	259.263	317.934	82.9739	3	28
P18	AF103D	Kinase F1/R1 + probe	UNKNOWN	FAM	30.7939	31.1014	0.434966	376.606			3	27
A19	AF106A	Kinase F1/R1 + probe	UNKNOWN	FAM	34.2738	34.0777	0.277371	45.5598	51.6834	8.66002	3	31
B19	AF106A	Kinase F1/R1 + probe	UNKNOWN	FAM	33.8816	34.0777	0.277371	57.8069			3	31
C19	AF106B	Kinase F1/R1 + probe	UNKNOWN	FAM	19.5911	19.6294	0.0542029	337970	330288	10864.1	3	16
D19	AF106B	Kinase F1/R1 + probe	UNKNOWN	FAM	19.6678	19.6294	0.0542029	322606			3	16
E19	AF106C	Kinase F1/R1 + probe	UNKNOWN	FAM	21.691	21.9766	0.403844	94482.8	80643.9	19571.3	3	18
F19	AF106C	Kinase F1/R1 + probe	UNKNOWN	FAM	22.2621	21.9766	0.403844	66804.9			3	19
G19	AF106D	Kinase F1/R1 + probe	UNKNOWN	FAM	20.212	20.2261	0.0199796	231853	229882	2787.68	3	17
H19	AF106D	Kinase F1/R1 + probe	UNKNOWN	FAM	20.2402	20.2261	0.0199796	227911			3	17
A24	Long kinase 0274-1	Kinase F1/R1 + probe	STANDARD	FAM	15.2472	15.092	0.219526	4.71953e+06	5.20883e+06	691983	3	12
B24	Long kinase 0274-1	Kinase F1/R1 + probe	STANDARD	FAM	14.9368	15.092	0.219526	5.69814e+06			3	12
C24	Long kinase 0274-2	Kinase F1/R1 + probe	STANDARD	FAM	20.6991	20.9419	0.343349	172510	150493	31137.1	3	17
D24	Long kinase 0274-2	Kinase F1/R1 + probe	STANDARD	FAM	21.1847	20.9419	0.343349	128476			3	18
E24	Long kinase 0274-3	Kinase F1/R1 + probe	STANDARD	FAM	32.8044	31.8611	1.33411	111.15	230.241	168.42	3	29
F24	Long kinase 0274-3	Kinase F1/R1 + probe	STANDARD	FAM	30.9177	31.8611	1.33411	349.331			3	28
G24	Long kinase 0274-4	Kinase F1/R1 + probe	STANDARD	FAM	30.5136	30.5833	0.0985171	446.433	428.334	25.5971	3	27
H24	Long kinase 0274-4	Kinase F1/R1 + probe	STANDARD	FAM	30.6529	30.5833	0.0985171	410.234			3	27
I24	Long kinase 0274-5	Kinase F1/R1 + probe	STANDARD	FAM	35.1511	35.1511		26.7504	#VALUE!	#VALUE!	3	32
J24	Long kinase 0274-5	Kinase F1/R1 + probe	STANDARD	FAM	Undetermined	35.1511		#VALUE!			3	39
K24	Long kinase 0274-6	Kinase F1/R1 + probe	STANDARD	FAM	Undetermined	36.8969		#VALUE!	#VALUE!	#VALUE!	3	39
L24	Long kinase 0274-6	Kinase F1/R1 + probe	STANDARD	FAM	36.8969	36.8969					3	34
M24	NTC	Kinase F1/R1 + probe	NTC	FAM	Undetermined						3	39
N24	NTC	Kinase F1/R1 + probe	NTC	FAM	Undetermined						3	39
O24	NTC	Kinase F1/R1 + probe	NTC	FAM	Undetermined						3	39
P24	NTC	Kinase F1/R1 + probe	NTC	FAM	Undetermined						3	39

## Sheet: Longum_P3
Block Type	384-Well Block
Calibration Background is expired	Yes
Calibration Background performed on	2015-09-28 10:38:58 AM NZDT
Calibration FAM is expired	Yes
Calibration FAM performed on	2015-09-28 12:44:37 PM NZDT
Calibration NED is expired	Yes
Calibration NED performed on	2015-09-28 12:27:45 PM NZDT
Calibration ROI is expired	Yes
Calibration ROI performed on	2015-09-28 10:31:42 AM NZDT
Calibration ROX is expired	Yes
Calibration ROX performed on	2015-09-28 11:50:26 AM NZDT
Calibration SYBR is expired	Yes
Calibration SYBR performed on	2015-09-28 11:35:56 AM NZDT
Calibration TAMRA is expired	Yes
Calibration TAMRA performed on	2015-09-28 12:05:53 PM NZDT
Calibration Uniformity is expired	Yes
Calibration Uniformity performed on	2015-09-28 11:17:29 AM NZDT
Calibration VIC is expired	Yes
Calibration VIC performed on	2015-09-28 12:36:53 PM NZDT
Chemistry	TAQMAN
Experiment File Name	E:\Taq sialidase - Kinase comparisons\11-Chin formula 384 P3 Taq Kinase.eds
Experiment Name	Chin formula 384 P3 Taq Kinase
Experiment Run Start Time	2016-07-27 22:11:37 PM NZST
Experiment Run Stop Time	2016-07-27 23:06:48 PM NZST
Experiment Type	Standard Curve
Instrument Name	ViiA7
Instrument Serial Number	278880388
Instrument Type	ViiA(TM) 7 System
Passive Reference	ROX
Quantification Cycle Method	Ct
Signal Smoothing On	true
Stage/ Cycle where Analysis is performed	Stage 2, Step 2
Well Position	Sample Name	Target Name	Task	Reporter	CT	Ct Mean	Ct SD	Quant by formula	Av. Q/formula	SD Q/formula	Baseline Start	Baseline End
A1	AF036A	Kinase F1/R1 +probe	UNKNOWN	FAM	32.4103	33.4527	1.47417	141.188	90.5109	71.6678	1	40
B1	AF036A	Kinase F1/R1 +probe	UNKNOWN	FAM	34.4951	33.4527	1.47417	39.8341			1	40
C1	AF036B	Kinase F1/R1 +probe	UNKNOWN	FAM	30.979	31.5445	0.799694	336.571	252.996	118.193	1	40
D1	AF036B	Kinase F1/R1 +probe	UNKNOWN	FAM	32.11	31.5445	0.799694	169.421			1	40
E1	AF036C	Kinase F1/R1 +probe	UNKNOWN	FAM	Undetermined			#VALUE!	#VALUE!	#VALUE!	1	40
F1	AF036C	Kinase F1/R1 +probe	UNKNOWN	FAM	Undetermined			#VALUE!			1	40
G1	AF036D	Kinase F1/R1 +probe	UNKNOWN	FAM	31.2073	31.3041	0.136915	293.034	276.788	22.9747	1	40
H1	AF036D	Kinase F1/R1 +probe	UNKNOWN	FAM	31.4009	31.3041	0.136915	260.543			1	40
I1	AF039A	Kinase F1/R1 +probe	UNKNOWN	FAM	37.7225	37.7225		5.61734	#VALUE!	#VALUE!	1	40
J1	AF039A	Kinase F1/R1 +probe	UNKNOWN	FAM	Undetermined	37.7225		#VALUE!			1	40
K1	AF039B	Kinase F1/R1 +probe	UNKNOWN	FAM	Undetermined			#VALUE!	#VALUE!	#VALUE!	1	40
L1	AF039B	Kinase F1/R1 +probe	UNKNOWN	FAM	Undetermined			#VALUE!			1	40
M1	AF039C	Kinase F1/R1 +probe	UNKNOWN	FAM	Undetermined	36.608		#VALUE!	#VALUE!	#VALUE!	1	40
N1	AF039C	Kinase F1/R1 +probe	UNKNOWN	FAM	36.608	36.608		11.0488			1	40
O1	AF039D	Kinase F1/R1 +probe	UNKNOWN	FAM	Undetermined			#VALUE!	#VALUE!	#VALUE!	1	40
P1	AF039D	Kinase F1/R1 +probe	UNKNOWN	FAM	Undetermined			#VALUE!			1	40
A2	AF041A	Kinase F1/R1 +probe	UNKNOWN	FAM	Undetermined	36.2625		#VALUE!	#VALUE!	#VALUE!	1	40
B2	AF041A	Kinase F1/R1 +probe	UNKNOWN	FAM	36.2625	36.2625		13.6267			1	40
C2	AF041B	Kinase F1/R1 +probe	UNKNOWN	FAM	Undetermined			#VALUE!	#VALUE!	#VALUE!	1	40
D2	AF041B	Kinase F1/R1 +probe	UNKNOWN	FAM	Undetermined			#VALUE!			1	40
E2	AF041C	Kinase F1/R1 +probe	UNKNOWN	FAM	34.1081	34.2136	0.149174	50.381	47.3535	4.28157	1	40
F2	AF041C	Kinase F1/R1 +probe	UNKNOWN	FAM	34.3191	34.2136	0.149174	44.326			1	40
G2	AF041D	Kinase F1/R1 +probe	UNKNOWN	FAM	35.0922	35.1848	0.130943	27.7238	26.2502	2.08406	1	40
H2	AF041D	Kinase F1/R1 +probe	UNKNOWN	FAM	35.2774	35.1848	0.130943	24.7765			1	40
I2	AF043A	Kinase F1/R1 +probe	UNKNOWN	FAM	17.9168	18.0985	0.257101	933741	841286	130750	1	40
J2	AF043A	Kinase F1/R1 +probe	UNKNOWN	FAM	18.2803	18.0985	0.257101	748832			1	40
K2	AF043B	Kinase F1/R1 +probe	UNKNOWN	FAM	17.2746	17.2174	0.0808626	1.37876e+06	1.42831e+06	70072.4	1	40
L2	AF043B	Kinase F1/R1 +probe	UNKNOWN	FAM	17.1603	17.2174	0.0808626	1.47785e+06			1	40
M2	AF043C	Kinase F1/R1 +probe	UNKNOWN	FAM	17.3326	17.1464	0.263243	1.3311e+06	1.49983e+06	238621	1	40
N2	AF043C	Kinase F1/R1 +probe	UNKNOWN	FAM	16.9603	17.1464	0.263243	1.66856e+06			1	40
O2	AF043D	Kinase F1/R1 +probe	UNKNOWN	FAM	35.3928	35.667	0.38774	23.1011	19.8312	4.62443	1	40
P2	AF043D	Kinase F1/R1 +probe	UNKNOWN	FAM	35.9411	35.667	0.38774	16.5612			1	40
A3	AF045A	Kinase F1/R1 +probe	UNKNOWN	FAM	36.3961	36.3961		12.5654	#VALUE!	#VALUE!	1	40
B3	AF045A	Kinase F1/R1 +probe	UNKNOWN	FAM	Undetermined	36.3961		#VALUE!			1	40
C3	AF045B	Kinase F1/R1 +probe	UNKNOWN	FAM	35.4888	36.4409	1.34656	21.7935	14.327	10.5592	1	40
D3	AF045B	Kinase F1/R1 +probe	UNKNOWN	FAM	37.3931	36.4409	1.34656	6.86052			1	40
E3	AF045C	Kinase F1/R1 +probe	UNKNOWN	FAM	34.242	33.9932	0.351975	46.4475	54.639	11.5846	1	40
F3	AF045C	Kinase F1/R1 +probe	UNKNOWN	FAM	33.7443	33.9932	0.351975	62.8306			1	40
G3	AF045D	Kinase F1/R1 +probe	UNKNOWN	FAM	Undetermined			#VALUE!	#VALUE!	#VALUE!	1	40
H3	AF045D	Kinase F1/R1 +probe	UNKNOWN	FAM	Undetermined			#VALUE!			1	40
I3	AF048A	Kinase F1/R1 +probe	UNKNOWN	FAM	31.1218	31.2194	0.137991	308.63	291.393	24.3766	1	40
J3	AF048A	Kinase F1/R1 +probe	UNKNOWN	FAM	31.317	31.2194	0.137991	274.156			1	40
K3	AF048B	Kinase F1/R1 +probe	UNKNOWN	FAM	31.8039	31.1965	0.859034	204.009	315.235	157.297	1	40
L3	AF048B	Kinase F1/R1 +probe	UNKNOWN	FAM	30.589	31.1965	0.859034	426.461			1	40
M3	AF048C	Kinase F1/R1 +probe	UNKNOWN	FAM	35.9603	36.1551	0.275609	16.3701	14.6457	2.43859	1	40
N3	AF048C	Kinase F1/R1 +probe	UNKNOWN	FAM	36.35	36.1551	0.275609	12.9214			1	40
O3	AF048D	Kinase F1/R1 +probe	UNKNOWN	FAM	17.9106	17.3359	0.812759	937208	1.41003e+06	668671	1	40
P3	AF048D	Kinase F1/R1 +probe	UNKNOWN	FAM	16.7612	17.3359	0.812759	1.88285e+06			1	40
A4	AF051A	Kinase F1/R1 +probe	UNKNOWN	FAM	Undetermined			#VALUE!	#VALUE!	#VALUE!	1	40
B4	AF051A	Kinase F1/R1 +probe	UNKNOWN	FAM	Undetermined			#VALUE!			1	40
C4	AF051B	Kinase F1/R1 +probe	UNKNOWN	FAM	35.715	35.785	0.0988893	18.9971	18.2241	1.09317	1	40
D4	AF051B	Kinase F1/R1 +probe	UNKNOWN	FAM	35.8549	35.785	0.0988893	17.4511			1	40
E4	AF051C	Kinase F1/R1 +probe	UNKNOWN	FAM	35.0428	35.6785	0.899032	28.5689	20.8872	10.8636	1	40
F4	AF051C	Kinase F1/R1 +probe	UNKNOWN	FAM	36.3142	35.6785	0.899032	13.2055			1	40
G4	AF051D	Kinase F1/R1 +probe	UNKNOWN	FAM	Undetermined			#VALUE!	#VALUE!	#VALUE!	1	40
H4	AF051D	Kinase F1/R1 +probe	UNKNOWN	FAM	Undetermined			#VALUE!			1	40
I4	AF052A	Kinase F1/R1 +probe	UNKNOWN	FAM	17.9387	18.1249	0.263307	921386	828192	131796	1	40
J4	AF052A	Kinase F1/R1 +probe	UNKNOWN	FAM	18.3111	18.1249	0.263307	734998			1	40
K4	AF052B	Kinase F1/R1 +probe	UNKNOWN	FAM	17.1129	17.2333	0.170252	1.52094e+06	1.41755e+06	146221	1	40
L4	AF052B	Kinase F1/R1 +probe	UNKNOWN	FAM	17.3537	17.2333	0.170252	1.31415e+06			1	40
M4	AF052C	Kinase F1/R1 +probe	UNKNOWN	FAM	18.1807	18.3766	0.277039	795500	711320	119047	1	40
N4	AF052C	Kinase F1/R1 +probe	UNKNOWN	FAM	18.5725	18.3766	0.277039	627141			1	40
O4	AF052D	Kinase F1/R1 +probe	UNKNOWN	FAM	17.4469	17.4186	0.0400334	1.24188e+06	1.26359e+06	30700	1	40
P4	AF052D	Kinase F1/R1 +probe	UNKNOWN	FAM	17.3903	17.4186	0.0400334	1.28529e+06			1	40
A5	AF056A	Kinase F1/R1 +probe	UNKNOWN	FAM	24.8384	25.055	0.306326	13986.4	12369.5	2286.64	1	40
B5	AF056A	Kinase F1/R1 +probe	UNKNOWN	FAM	25.2716	25.055	0.306326	10752.6			1	40
C5	AF056B	Kinase F1/R1 +probe	UNKNOWN	FAM	20.0465	20.1883	0.200601	256353	236078	28672.9	1	40
D5	AF056B	Kinase F1/R1 +probe	UNKNOWN	FAM	20.3302	20.1883	0.200601	215803			1	40
E5	AF056C	Kinase F1/R1 +probe	UNKNOWN	FAM	18.0713	18.6379	0.801265	850111	638729	298940	1	40
F5	AF056C	Kinase F1/R1 +probe	UNKNOWN	FAM	19.2045	18.6379	0.801265	427347			1	40
G5	AF056D	Kinase F1/R1 +probe	UNKNOWN	FAM	19.9616	20.3147	0.499341	269905	222862	66528.6	1	40
H5	AF056D	Kinase F1/R1 +probe	UNKNOWN	FAM	20.6678	20.3147	0.499341	175819			1	40
I5	AF059A	Kinase F1/R1 +probe	UNKNOWN	FAM	37.6287	37.6287		5.94641	#VALUE!	#VALUE!	1	40
J5	AF059A	Kinase F1/R1 +probe	UNKNOWN	FAM	Undetermined	37.6287		#VALUE!			1	40
K5	AF059B	Kinase F1/R1 +probe	UNKNOWN	FAM	Undetermined			#VALUE!	#VALUE!	#VALUE!	1	40
L5	AF059B	Kinase F1/R1 +probe	UNKNOWN	FAM	Undetermined			#VALUE!			1	40
M5	AF059C	Kinase F1/R1 +probe	UNKNOWN	FAM	35.3625	36.0824	1.01811	23.5293	16.6743	9.69447	1	40
N5	AF059C	Kinase F1/R1 +probe	UNKNOWN	FAM	36.8023	36.0824	1.01811	9.81926			1	40
O5	AF059D	Kinase F1/R1 +probe	UNKNOWN	FAM	36.6623	36.1784	0.684395	10.6903	14.9632	6.04281	1	40
P5	AF059D	Kinase F1/R1 +probe	UNKNOWN	FAM	35.6944	36.1784	0.684395	19.2361			1	40
A6	AF073A	Kinase F1/R1 +probe	UNKNOWN	FAM	32.944	33.5923	0.91697	102.125	74.3048	39.3442	1	40
B6	AF073A	Kinase F1/R1 +probe	UNKNOWN	FAM	34.2407	33.5923	0.91697	46.4843			1	40
C6	AF073B	Kinase F1/R1 +probe	UNKNOWN	FAM	34.1072	35.1812	1.51885	50.4084	32.0476	25.966	1	40
D6	AF073B	Kinase F1/R1 +probe	UNKNOWN	FAM	36.2552	35.1812	1.51885	13.6869			1	40
E6	AF073C	Kinase F1/R1 +probe	UNKNOWN	FAM	31.2509	31.4225	0.242634	285.37	258.544	37.9377	1	40
F6	AF073C	Kinase F1/R1 +probe	UNKNOWN	FAM	31.5941	31.4225	0.242634	231.718			1	40
G6	AF073D	Kinase F1/R1 +probe	UNKNOWN	FAM	Undetermined			#VALUE!	#VALUE!	#VALUE!	1	40
H6	AF073D	Kinase F1/R1 +probe	UNKNOWN	FAM	Undetermined			#VALUE!			1	40
I6	AF080A	Kinase F1/R1 +probe	UNKNOWN	FAM	36.1565	35.5718	0.826923	14.5318	22.0417	10.6205	1	40
J6	AF080A	Kinase F1/R1 +probe	UNKNOWN	FAM	34.9871	35.5718	0.826923	29.5515			1	40
K6	AF080B	Kinase F1/R1 +probe	UNKNOWN	FAM	Undetermined			#VALUE!	#VALUE!	#VALUE!	1	40
L6	AF080B	Kinase F1/R1 +probe	UNKNOWN	FAM	Undetermined			#VALUE!			1	40
M6	AF080C	Kinase F1/R1 +probe	UNKNOWN	FAM	33.4358	33.2576	0.251977	75.7669	84.9142	12.9362	1	40
N6	AF080C	Kinase F1/R1 +probe	UNKNOWN	FAM	33.0795	33.2576	0.251977	94.0615			1	40
O6	AF080D	Kinase F1/R1 +probe	UNKNOWN	FAM	Undetermined	36.563		#VALUE!	#VALUE!	#VALUE!	1	40
P6	AF080D	Kinase F1/R1 +probe	UNKNOWN	FAM	36.563	36.563		11.3546			1	40
A7	AF083A	Kinase F1/R1 +probe	UNKNOWN	FAM	31.8363	31.9377	0.14345	200.033	188.446	16.3867	1	40
B7	AF083A	Kinase F1/R1 +probe	UNKNOWN	FAM	32.0392	31.9377	0.14345	176.859			1	40
C7	AF083B	Kinase F1/R1 +probe	UNKNOWN	FAM	Undetermined			#VALUE!	#VALUE!	#VALUE!	1	40
D7	AF083B	Kinase F1/R1 +probe	UNKNOWN	FAM	Undetermined			#VALUE!			1	40
E7	AF083C	Kinase F1/R1 +probe	UNKNOWN	FAM	36.0448	36.4329	0.548907	15.5513	12.6298	4.13159	1	40
F7	AF083C	Kinase F1/R1 +probe	UNKNOWN	FAM	36.8211	36.4329	0.548907	9.70834			1	40
G7	AF083D	Kinase F1/R1 +probe	UNKNOWN	FAM	37.6829	37.6829		5.75396	#VALUE!	#VALUE!	1	40
H7	AF083D	Kinase F1/R1 +probe	UNKNOWN	FAM	Undetermined	37.6829		#VALUE!			1	40
I7	AF086A	Kinase F1/R1 +probe	UNKNOWN	FAM	22.9001	22.9464	0.0654187	45355.8	44117.4	1751.28	1	40
J7	AF086A	Kinase F1/R1 +probe	UNKNOWN	FAM	22.9927	22.9464	0.0654187	42879.1			1	40
K7	AF086B	Kinase F1/R1 +probe	UNKNOWN	FAM	25.6138	25.5604	0.075453	8736.46	9028.73	413.334	1	40
L7	AF086B	Kinase F1/R1 +probe	UNKNOWN	FAM	25.507	25.5604	0.075453	9321			1	40
M7	AF086C	Kinase F1/R1 +probe	UNKNOWN	FAM	22.9158	23.0134	0.138119	44927.3	42415.9	3551.62	1	40
N7	AF086C	Kinase F1/R1 +probe	UNKNOWN	FAM	23.1111	23.0134	0.138119	39904.5			1	40
O7	AF086D	Kinase F1/R1 +probe	UNKNOWN	FAM	18.7249	19.1031	0.534944	571759	466500	148859	1	40
P7	AF086D	Kinase F1/R1 +probe	UNKNOWN	FAM	19.4814	19.1031	0.534944	361241			1	40
A8	AF088A	Kinase F1/R1 +probe	UNKNOWN	FAM	32.067	32.0678	0.00115988	173.897	173.81	0.122337	1	40
B8	AF088A	Kinase F1/R1 +probe	UNKNOWN	FAM	32.0686	32.0678	0.00115988	173.724			1	40
C8	AF088B	Kinase F1/R1 +probe	UNKNOWN	FAM	20.1245	20.3125	0.265978	244503	219549	35289.8	1	40
D8	AF088B	Kinase F1/R1 +probe	UNKNOWN	FAM	20.5006	20.3125	0.265978	194595			1	40
E8	AF088C	Kinase F1/R1 +probe	UNKNOWN	FAM	17.3939	17.6256	0.327724	1.28247e+06	1.12524e+06	222359	1	40
F8	AF088C	Kinase F1/R1 +probe	UNKNOWN	FAM	17.8574	17.6256	0.327724	968004			1	40
G8	AF088D	Kinase F1/R1 +probe	UNKNOWN	FAM	18.1137	18.1624	0.068905	828551	804759	33646.9	1	40
H8	AF088D	Kinase F1/R1 +probe	UNKNOWN	FAM	18.2111	18.1624	0.068905	780967			1	40
I8	AF089A	Kinase F1/R1 +probe	UNKNOWN	FAM	36.6677	36.6526	0.0213364	10.6552	10.7537	0.139266	1	40
J8	AF089A	Kinase F1/R1 +probe	UNKNOWN	FAM	36.6376	36.6526	0.0213364	10.8522			1	40
K8	AF089B	Kinase F1/R1 +probe	UNKNOWN	FAM	Undetermined			#VALUE!	#VALUE!	#VALUE!	1	40
L8	AF089B	Kinase F1/R1 +probe	UNKNOWN	FAM	Undetermined			#VALUE!			1	40
M8	AF089C	Kinase F1/R1 +probe	UNKNOWN	FAM	33.1008	33.5597	0.64894	92.8526	73.0245	28.0411	1	40
N8	AF089C	Kinase F1/R1 +probe	UNKNOWN	FAM	34.0185	33.5597	0.64894	53.1964			1	40
O8	AF089D	Kinase F1/R1 +probe	UNKNOWN	FAM	35.095	35.3656	0.382685	27.6781	23.8034	5.47965	1	40
P8	AF089D	Kinase F1/R1 +probe	UNKNOWN	FAM	35.6362	35.3656	0.382685	19.9287			1	40
A9	AF091A	Kinase F1/R1 +probe	UNKNOWN	FAM	Undetermined			#VALUE!	#VALUE!	#VALUE!	1	40
B9	AF091A	Kinase F1/R1 +probe	UNKNOWN	FAM	Undetermined			#VALUE!			1	40
C9	AF091B	Kinase F1/R1 +probe	UNKNOWN	FAM	35.4184	35.1047	0.443641	22.7444	28.015	7.45367	1	40
D9	AF091B	Kinase F1/R1 +probe	UNKNOWN	FAM	34.791	35.1047	0.443641	33.2855			1	40
E9	AF091C	Kinase F1/R1 +probe	UNKNOWN	FAM	34.2785	34.3225	0.0622586	45.4315	44.2495	1.67168	1	40
F9	AF091C	Kinase F1/R1 +probe	UNKNOWN	FAM	34.3665	34.3225	0.0622586	43.0674			1	40
G9	AF091D	Kinase F1/R1 +probe	UNKNOWN	FAM	33.2439	33.6177	0.528612	85.1258	69.601	21.9554	1	40
H9	AF091D	Kinase F1/R1 +probe	UNKNOWN	FAM	33.9915	33.6177	0.528612	54.0761			1	40
I9	AF095A	Kinase F1/R1 +probe	UNKNOWN	FAM	Undetermined			#VALUE!	#VALUE!	#VALUE!	1	40
J9	AF095A	Kinase F1/R1 +probe	UNKNOWN	FAM	Undetermined			#VALUE!			1	40
K9	AF095B	Kinase F1/R1 +probe	UNKNOWN	FAM	Undetermined			#VALUE!	#VALUE!	#VALUE!	1	40
L9	AF095B	Kinase F1/R1 +probe	UNKNOWN	FAM	Undetermined			#VALUE!			1	40
M9	AF095C	Kinase F1/R1 +probe	UNKNOWN	FAM	Undetermined			#VALUE!	#VALUE!	#VALUE!	1	40
N9	AF095C	Kinase F1/R1 +probe	UNKNOWN	FAM	Undetermined			#VALUE!			1	40
O9	AF095D	Kinase F1/R1 +probe	UNKNOWN	FAM	36.4597	36.4597		12.0895	#VALUE!	#VALUE!	1	40
P9	AF095D	Kinase F1/R1 +probe	UNKNOWN	FAM	Undetermined	36.4597		#VALUE!			1	40
A10	AF096A	Kinase F1/R1 +probe	UNKNOWN	FAM	27.026	27.0958	0.098718	3707.36	3556.76	212.982	1	40
B10	AF096A	Kinase F1/R1 +probe	UNKNOWN	FAM	27.1656	27.0958	0.098718	3406.16			1	40
C10	AF096B	Kinase F1/R1 +probe	UNKNOWN	FAM	Undetermined			#VALUE!	#VALUE!	#VALUE!	1	40
D10	AF096B	Kinase F1/R1 +probe	UNKNOWN	FAM	Undetermined			#VALUE!			1	40
E10	AF096C	Kinase F1/R1 +probe	UNKNOWN	FAM	37.3095	37.8704	0.793326	7.21786	5.43552	2.5206	1	40
F10	AF096C	Kinase F1/R1 +probe	UNKNOWN	FAM	38.4314	37.8704	0.793326	3.65319			1	40
G10	AF096D	Kinase F1/R1 +probe	UNKNOWN	FAM	35.5722	34.9039	0.945128	20.7179	33.6742	18.323	1	40
H10	AF096D	Kinase F1/R1 +probe	UNKNOWN	FAM	34.2356	34.9039	0.945128	46.6305			1	40
I10	AF097A	Kinase F1/R1 +probe	UNKNOWN	FAM	35.0505	34.8784	0.243357	28.4355	31.7384	4.67095	1	40
J10	AF097A	Kinase F1/R1 +probe	UNKNOWN	FAM	34.7063	34.8784	0.243357	35.0412			1	40
K10	AF097B	Kinase F1/R1 +probe	UNKNOWN	FAM	18.0359	18.026	0.0139145	868625	873843	7379.84	1	40
L10	AF097B	Kinase F1/R1 +probe	UNKNOWN	FAM	18.0162	18.026	0.0139145	879062			1	40
M10	AF097C	Kinase F1/R1 +probe	UNKNOWN	FAM	19.5008	19.4245	0.107965	357006	374339	24512.4	1	40
N10	AF097C	Kinase F1/R1 +probe	UNKNOWN	FAM	19.3481	19.4245	0.107965	391672			1	40
O10	AF097D	Kinase F1/R1 +probe	UNKNOWN	FAM	36.0004	35.6712	0.465433	15.9764	19.8993	5.54786	1	40
P10	AF097D	Kinase F1/R1 +probe	UNKNOWN	FAM	35.3421	35.6712	0.465433	23.8223			1	40
A11	AF098A	Kinase F1/R1 +probe	UNKNOWN	FAM	36.0298	36.7292	0.989006	15.6933	11.204	6.34875	1	40
B11	AF098A	Kinase F1/R1 +probe	UNKNOWN	FAM	37.4285	36.7292	0.989006	6.71478			1	40
C11	AF098B	Kinase F1/R1 +probe	UNKNOWN	FAM	33.955	34.2612	0.433121	55.2882	46.705	12.1384	1	40
D11	AF098B	Kinase F1/R1 +probe	UNKNOWN	FAM	34.5675	34.2612	0.433121	38.1219			1	40
E11	AF098C	Kinase F1/R1 +probe	UNKNOWN	FAM	34.9946	35.0462	0.0729619	29.4164	28.5235	1.26272	1	40
F11	AF098C	Kinase F1/R1 +probe	UNKNOWN	FAM	35.0978	35.0462	0.0729619	27.6306			1	40
G11	AF098D	Kinase F1/R1 +probe	UNKNOWN	FAM	32.3863	32.5239	0.194606	143.26	132.24	15.5836	1	40
H11	AF098D	Kinase F1/R1 +probe	UNKNOWN	FAM	32.6615	32.5239	0.194606	121.221			1	40
I11	AF099A	Kinase F1/R1 +probe	UNKNOWN	FAM	35.4881	36.0305	0.766973	21.802	16.5446	7.4351	1	40
J11	AF099A	Kinase F1/R1 +probe	UNKNOWN	FAM	36.5728	36.0305	0.766973	11.2872			1	40
K11	AF099B	Kinase F1/R1 +probe	UNKNOWN	FAM	37.3164	36.11	1.70606	7.18771	19.1372	16.8992	1	40
L11	AF099B	Kinase F1/R1 +probe	UNKNOWN	FAM	34.9036	36.11	1.70606	31.0867			1	40
M11	AF099C	Kinase F1/R1 +probe	UNKNOWN	FAM	35.7045	35.024	0.962405	19.1191	31.397	17.3636	1	40
N11	AF099C	Kinase F1/R1 +probe	UNKNOWN	FAM	34.3434	35.024	0.962405	43.675			1	40
O11	AF099D	Kinase F1/R1 +probe	UNKNOWN	FAM	35.6945	36.6416	1.33947	19.2357	12.664	9.29381	1	40
P11	AF099D	Kinase F1/R1 +probe	UNKNOWN	FAM	37.5888	36.6416	1.33947	6.0923			1	40
A12	AF102A	Kinase F1/R1 +probe	UNKNOWN	FAM	18.0677	17.9058	0.228917	852012	944509	130811	1	40
B12	AF102A	Kinase F1/R1 +probe	UNKNOWN	FAM	17.7439	17.9058	0.228917	1.03701e+06			1	40
C12	AF102B	Kinase F1/R1 +probe	UNKNOWN	FAM	21.3745	21.3293	0.0638757	114494	117720	4562.79	1	40
D12	AF102B	Kinase F1/R1 +probe	UNKNOWN	FAM	21.2842	21.3293	0.0638757	120946			1	40
E12	AF102C	Kinase F1/R1 +probe	UNKNOWN	FAM	19.0741	19.3785	0.430518	462552	391100	101048	1	40
F12	AF102C	Kinase F1/R1 +probe	UNKNOWN	FAM	19.6829	19.3785	0.430518	319648			1	40
G12	AF102D	Kinase F1/R1 +probe	UNKNOWN	FAM	33.5233	33.6123	0.125828	71.848	68.1702	5.20117	1	40
H12	AF102D	Kinase F1/R1 +probe	UNKNOWN	FAM	33.7013	33.6123	0.125828	64.4924			1	40
I12	BF001	Kinase F1/R1 +probe	UNKNOWN	FAM	27.7416	28.0932	0.497248	2401.28	1984.16	589.901	1	40
J12	BF001	Kinase F1/R1 +probe	UNKNOWN	FAM	28.4448	28.0932	0.497248	1567.04			1	40
K12	BF002	Kinase F1/R1 +probe	UNKNOWN	FAM	24.4731	24.8207	0.491653	17458.5	14453.3	4250.09	1	40
L12	BF002	Kinase F1/R1 +probe	UNKNOWN	FAM	25.1684	24.8207	0.491653	11448			1	40
M12	BF003	Kinase F1/R1 +probe	UNKNOWN	FAM	30.553	30.8717	0.450697	435.893	365.973	98.882	1	40
N12	BF003	Kinase F1/R1 +probe	UNKNOWN	FAM	31.1904	30.8717	0.450697	296.052			1	40
O12	BF004	Kinase F1/R1 +probe	UNKNOWN	FAM	15.6663	16.9418	1.80388	3.65969e+06	2.21886e+06	2.03764e+06	1	40
P12	BF004	Kinase F1/R1 +probe	UNKNOWN	FAM	18.2173	16.9418	1.80388	778030			1	40
A13	BF005	Kinase F1/R1 +probe	UNKNOWN	FAM	30.1449	30.6208	0.673072	558.411	435.886	173.276	1	40
B13	BF005	Kinase F1/R1 +probe	UNKNOWN	FAM	31.0968	30.6208	0.673072	313.362			1	40
C13	BF006	Kinase F1/R1 +probe	UNKNOWN	FAM	15.8338	16.0845	0.354524	3.30584e+06	2.87217e+06	613304	1	40
D13	BF006	Kinase F1/R1 +probe	UNKNOWN	FAM	16.3352	16.0845	0.354524	2.4385e+06			1	40
E13	BF007	Kinase F1/R1 +probe	UNKNOWN	FAM	15.1665	15.1882	0.0307186	4.95667e+06	4.89218e+06	91208.3	1	40
F13	BF007	Kinase F1/R1 +probe	UNKNOWN	FAM	15.2099	15.1882	0.0307186	4.82768e+06			1	40
G13	BF008	Kinase F1/R1 +probe	UNKNOWN	FAM	36.8528	36.8528		9.52318	#VALUE!	#VALUE!	1	40
H13	BF008	Kinase F1/R1 +probe	UNKNOWN	FAM	Undetermined	36.8528		#VALUE!			1	40
I13	BF009	Kinase F1/R1 +probe	UNKNOWN	FAM	30.1004	30.5808	0.679475	573.702	446.94	179.268	1	40
J13	BF009	Kinase F1/R1 +probe	UNKNOWN	FAM	31.0613	30.5808	0.679475	320.178			1	40
K13	BF010	Kinase F1/R1 +probe	UNKNOWN	FAM	28.812	28.9549	0.202146	1254	1154.12	141.248	1	40
L13	BF010	Kinase F1/R1 +probe	UNKNOWN	FAM	29.0979	28.9549	0.202146	1054.25			1	40
M13	BF011	Kinase F1/R1 +probe	UNKNOWN	FAM	32.3932	32.5947	0.284942	142.659	127.183	21.8868	1	40
N13	BF011	Kinase F1/R1 +probe	UNKNOWN	FAM	32.7962	32.5947	0.284942	111.707			1	40
O13	BF012	Kinase F1/R1 +probe	UNKNOWN	FAM	28.0708	28.1913	0.170405	1966.39	1832.61	189.204	1	40
P13	BF012	Kinase F1/R1 +probe	UNKNOWN	FAM	28.3118	28.1913	0.170405	1698.82			1	40
A14	BF013	Kinase F1/R1 +probe	UNKNOWN	FAM	17.5797	17.5752	0.00635777	1.14574e+06	1.14887e+06	4432.69	1	40
B14	BF013	Kinase F1/R1 +probe	UNKNOWN	FAM	17.5707	17.5752	0.00635777	1.15201e+06			1	40
C14	BF014	Kinase F1/R1 +probe	UNKNOWN	FAM	31.0544	31.0933	0.05512	321.529	314.1	10.5062	1	40
D14	BF014	Kinase F1/R1 +probe	UNKNOWN	FAM	31.1323	31.0933	0.05512	306.671			1	40
E14	BF015	Kinase F1/R1 +probe	UNKNOWN	FAM	17.0632	17.1846	0.171662	1.56753e+06	1.46015e+06	151858	1	40
F14	BF015	Kinase F1/R1 +probe	UNKNOWN	FAM	17.306	17.1846	0.171662	1.35277e+06			1	40
G14	BF016	Kinase F1/R1 +probe	UNKNOWN	FAM	23.2559	23.3361	0.113334	36546.2	34852.3	2395.52	1	40
H14	BF016	Kinase F1/R1 +probe	UNKNOWN	FAM	23.4162	23.3361	0.113334	33158.4			1	40
I14	BF017	Kinase F1/R1 +probe	UNKNOWN	FAM	19.0468	19.5705	0.740619	470273	359654	156438	1	40
J14	BF017	Kinase F1/R1 +probe	UNKNOWN	FAM	20.0942	19.5705	0.740619	249036			1	40
K14	BF018	Kinase F1/R1 +probe	UNKNOWN	FAM	22.0057	21.9781	0.0390462	78054.9	79385.1	1881.19	1	40
L14	BF018	Kinase F1/R1 +probe	UNKNOWN	FAM	21.9505	21.9781	0.0390462	80715.3			1	40
M14	BF019	Kinase F1/R1 +probe	UNKNOWN	FAM	19.8883	19.9195	0.0441375	282181	276935	7418.02	1	40
N14	BF019	Kinase F1/R1 +probe	UNKNOWN	FAM	19.9508	19.9195	0.0441375	271690			1	40
O14	BF021	Kinase F1/R1 +probe	UNKNOWN	FAM	15.5775	15.5954	0.0253852	3.86236e+06	3.82074e+06	58865.7	1	40
P14	BF021	Kinase F1/R1 +probe	UNKNOWN	FAM	15.6134	15.5954	0.0253852	3.77912e+06			1	40
A15	BF022	Kinase F1/R1 +probe	UNKNOWN	FAM	26.7621	26.7172	0.0635898	4351.36	4473.41	172.613	1	40
B15	BF022	Kinase F1/R1 +probe	UNKNOWN	FAM	26.6722	26.7172	0.0635898	4595.47			1	40
C15	BF023	Kinase F1/R1 +probe	UNKNOWN	FAM	17.4636	17.4611	0.00362395	1.22933e+06	1.23125e+06	2708.71	1	40
D15	BF023	Kinase F1/R1 +probe	UNKNOWN	FAM	17.4585	17.4611	0.00362395	1.23316e+06			1	40
E15	BF024	Kinase F1/R1 +probe	UNKNOWN	FAM	15.8487	16.3234	0.671311	3.2761e+06	2.55866e+06	1.01461e+06	1	40
F15	BF024	Kinase F1/R1 +probe	UNKNOWN	FAM	16.7981	16.3234	0.671311	1.84122e+06			1	40
G15	BF025	Kinase F1/R1 +probe	UNKNOWN	FAM	16.7524	17.1689	0.588961	1.89292e+06	1.51735e+06	531142	1	40
H15	BF025	Kinase F1/R1 +probe	UNKNOWN	FAM	17.5854	17.1689	0.588961	1.14177e+06			1	40
I15	BF026	Kinase F1/R1 +probe	UNKNOWN	FAM	17.2374	17.455	0.307649	1.41025e+06	1.24661e+06	231433	1	40
J15	BF026	Kinase F1/R1 +probe	UNKNOWN	FAM	17.6725	17.455	0.307649	1.08296e+06			1	40
K15	BF027	Kinase F1/R1 +probe	UNKNOWN	FAM	16.7048	16.6156	0.126229	1.94842e+06	2.05991e+06	157664	1	40
L15	BF027	Kinase F1/R1 +probe	UNKNOWN	FAM	16.5263	16.6156	0.126229	2.17139e+06			1	40
M15	BF028	Kinase F1/R1 +probe	UNKNOWN	FAM	16.2864	16.2252	0.0864557	2.51181e+06	2.60855e+06	136819	1	40
N15	BF028	Kinase F1/R1 +probe	UNKNOWN	FAM	16.1641	16.2252	0.0864557	2.7053e+06			1	40
O15	BF029	Kinase F1/R1 +probe	UNKNOWN	FAM	16.8204	16.8408	0.0288433	1.81641e+06	1.7942e+06	31408.8	1	40
P15	BF029	Kinase F1/R1 +probe	UNKNOWN	FAM	16.8612	16.8408	0.0288433	1.77199e+06			1	40
A16	BF030	Kinase F1/R1 +probe	UNKNOWN	FAM	14.6748	14.7413	0.0940529	6.68028e+06	6.42122e+06	366359	1	40
B16	BF030	Kinase F1/R1 +probe	UNKNOWN	FAM	14.8078	14.7413	0.0940529	6.16217e+06			1	40
C16	BF031	Kinase F1/R1 +probe	UNKNOWN	FAM	34.3032	34.9427	0.904346	44.7555	32.6744	17.0853	1	40
D16	BF031	Kinase F1/R1 +probe	UNKNOWN	FAM	35.5821	34.9427	0.904346	20.5932			1	40
E16	BF032	Kinase F1/R1 +probe	UNKNOWN	FAM	36.1052	36.6777	0.809737	14.9917	11.2367	5.31041	1	40
F16	BF032	Kinase F1/R1 +probe	UNKNOWN	FAM	37.2503	36.6777	0.809737	7.48165			1	40
G16	BF033	Kinase F1/R1 +probe	UNKNOWN	FAM	35.4594	35.545	0.121102	22.1862	21.091	1.54885	1	40
H16	BF033	Kinase F1/R1 +probe	UNKNOWN	FAM	35.6306	35.545	0.121102	19.9958			1	40
I16	BF034	Kinase F1/R1 +probe	UNKNOWN	FAM	30.9324	31.0099	0.109618	346.23	330.684	21.9852	1	40
J16	BF034	Kinase F1/R1 +probe	UNKNOWN	FAM	31.0874	31.0099	0.109618	315.138			1	40
K16	BF035	Kinase F1/R1 +probe	UNKNOWN	FAM	28.2109	29.2956	1.53399	1806.07	1145.06	934.804	1	40
L16	BF035	Kinase F1/R1 +probe	UNKNOWN	FAM	30.3803	29.2956	1.53399	484.053			1	40
M16	BF036	Kinase F1/R1 +probe	UNKNOWN	FAM	29.329	29.0926	0.334357	916.264	1068.56	215.375	1	40
N16	BF036	Kinase F1/R1 +probe	UNKNOWN	FAM	28.8561	29.0926	0.334357	1220.85			1	40
O16	BF037	Kinase F1/R1 +probe	UNKNOWN	FAM	35.5261	34.8336	0.979425	21.3053	35.3453	19.8555	1	40
P16	BF037	Kinase F1/R1 +probe	UNKNOWN	FAM	34.141	34.8336	0.979425	49.3853			1	40
A17	BF038	Kinase F1/R1 +probe	UNKNOWN	FAM	23.0077	22.8916	0.164212	42489.8	45705.6	4547.88	1	40
B17	BF038	Kinase F1/R1 +probe	UNKNOWN	FAM	22.7754	22.8916	0.164212	48921.5			1	40
C17	BF039	Kinase F1/R1 +probe	UNKNOWN	FAM	29.4257	29.803	0.533611	864.03	705.277	224.51	1	40
D17	BF039	Kinase F1/R1 +probe	UNKNOWN	FAM	30.1803	29.803	0.533611	546.525			1	40
E17	BF040	Kinase F1/R1 +probe	UNKNOWN	FAM	34.8887	34.8887		31.3695	#VALUE!	#VALUE!	1	40
F17	BF040	Kinase F1/R1 +probe	UNKNOWN	FAM	Undetermined	34.8887		#VALUE!			1	40
G17	BF041	Kinase F1/R1 +probe	UNKNOWN	FAM	17.5294	17.5085	0.0295824	1.18121e+06	1.1964e+06	21480.3	1	40
H17	BF041	Kinase F1/R1 +probe	UNKNOWN	FAM	17.4876	17.5085	0.0295824	1.21159e+06			1	40
I17	BF042	Kinase F1/R1 +probe	UNKNOWN	FAM	15.775	17.3553	2.23491	3.42597e+06	1.96454e+06	2.06678e+06	1	40
J17	BF042	Kinase F1/R1 +probe	UNKNOWN	FAM	18.9356	17.3553	2.23491	503100			1	40
K17	BF043	Kinase F1/R1 +probe	UNKNOWN	FAM	18.7786	18.6408	0.194875	553416	603798	71250.8	1	40
L17	BF043	Kinase F1/R1 +probe	UNKNOWN	FAM	18.503	18.6408	0.194875	654180			1	40
M17	BF044	Kinase F1/R1 +probe	UNKNOWN	FAM	Undetermined	37.7228		#VALUE!	#VALUE!	#VALUE!	1	40
N17	BF044	Kinase F1/R1 +probe	UNKNOWN	FAM	37.7228	37.7228		5.61647			1	40
O17	BF045	Kinase F1/R1 +probe	UNKNOWN	FAM	29.7164	29.6661	0.0711385	724.271	747.072	32.2464	1	40
P17	BF045	Kinase F1/R1 +probe	UNKNOWN	FAM	29.6158	29.6661	0.0711385	769.874			1	40
A18	BF046	Kinase F1/R1 +probe	UNKNOWN	FAM	30.4317	30.6562	0.317522	469.19	413.225	79.1471	1	40
B18	BF046	Kinase F1/R1 +probe	UNKNOWN	FAM	30.8807	30.6562	0.317522	357.259			1	40
C18	BF047	Kinase F1/R1 +probe	UNKNOWN	FAM	15.0478	15.2275	0.25415	5.32688e+06	4.80486e+06	738255	1	40
D18	BF047	Kinase F1/R1 +probe	UNKNOWN	FAM	15.4072	15.2275	0.25415	4.28283e+06			1	40
E18	BF048	Kinase F1/R1 +probe	UNKNOWN	FAM	15.2136	15.7701	0.78697	4.81675e+06	3.634e+06	1.67266e+06	1	40
F18	BF048	Kinase F1/R1 +probe	UNKNOWN	FAM	16.3266	15.7701	0.78697	2.45125e+06			1	40
G18	BF049	Kinase F1/R1 +probe	UNKNOWN	FAM	23.4607	23.4322	0.04026	32276	32843.4	802.486	1	40
H18	BF049	Kinase F1/R1 +probe	UNKNOWN	FAM	23.4037	23.4322	0.04026	33410.8			1	40
I18	BF050	Kinase F1/R1 +probe	UNKNOWN	FAM	16.9206	17.1188	0.280223	1.70922e+06	1.52651e+06	258387	1	40
J18	BF050	Kinase F1/R1 +probe	UNKNOWN	FAM	17.3169	17.1188	0.280223	1.3438e+06			1	40
K18	BF051	Kinase F1/R1 +probe	UNKNOWN	FAM	17.5387	17.8871	0.492803	1.1746e+06	972030	286481	1	40
L18	BF051	Kinase F1/R1 +probe	UNKNOWN	FAM	18.2356	17.8871	0.492803	769457			1	40
M18	BF052	Kinase F1/R1 +probe	UNKNOWN	FAM	Undetermined	37.211		#VALUE!	#VALUE!	#VALUE!	1	40
N18	BF052	Kinase F1/R1 +probe	UNKNOWN	FAM	37.211	37.211		7.66252			1	40
O18	BF053	Kinase F1/R1 +probe	UNKNOWN	FAM	30.7354	30.9494	0.302598	390.207	345.578	63.115	1	40
P18	BF053	Kinase F1/R1 +probe	UNKNOWN	FAM	31.1633	30.9494	0.302598	300.949			1	40
A19	BF054	Kinase F1/R1 +probe	UNKNOWN	FAM	26.642	26.8338	0.271215	4680.6	4194.55	687.381	1	40
B19	BF054	Kinase F1/R1 +probe	UNKNOWN	FAM	27.0255	26.8338	0.271215	3708.5			1	40
C19	BF055	Kinase F1/R1 +probe	UNKNOWN	FAM	16.575	17.6027	1.4534	2.10815e+06	1.35682e+06	1.06255e+06	1	40
D19	BF055	Kinase F1/R1 +probe	UNKNOWN	FAM	18.6304	17.6027	1.4534	605484			1	40
E19	BF056	Kinase F1/R1 +probe	UNKNOWN	FAM	14.7564	15.0351	0.394076	6.35735e+06	5.44511e+06	1.29011e+06	1	40
F19	BF056	Kinase F1/R1 +probe	UNKNOWN	FAM	15.3137	15.0351	0.394076	4.53287e+06			1	40
G19	BF057	Kinase F1/R1 +probe	UNKNOWN	FAM	15.3073	15.4127	0.149057	4.55052e+06	4.27727e+06	386437	1	40
H19	BF057	Kinase F1/R1 +probe	UNKNOWN	FAM	15.5181	15.4127	0.149057	4.00402e+06			1	40
I19	BF058	Kinase F1/R1 +probe	UNKNOWN	FAM	23.2714	23.7967	0.742934	36205.4	27670.1	12070.8	1	40
J19	BF058	Kinase F1/R1 +probe	UNKNOWN	FAM	24.322	23.7967	0.742934	19134.8			1	40
K19	BF059	Kinase F1/R1 +probe	UNKNOWN	FAM	24.1664	24.5272	0.510286	21030.6	17301.1	5274.39	1	40
L19	BF059	Kinase F1/R1 +probe	UNKNOWN	FAM	24.888	24.5272	0.510286	13571.5			1	40
M19	BF060	Kinase F1/R1 +probe	UNKNOWN	FAM	22.628	22.8715	0.344344	53502.2	46656.8	9680.9	1	40
N19	BF060	Kinase F1/R1 +probe	UNKNOWN	FAM	23.115	22.8715	0.344344	39811.4			1	40
O19	BF061	Kinase F1/R1 +probe	UNKNOWN	FAM	25.8289	25.8074	0.0304253	7666.89	7768.32	143.447	1	40
P19	BF061	Kinase F1/R1 +probe	UNKNOWN	FAM	25.7859	25.8074	0.0304253	7869.75			1	40
A20	BF062	Kinase F1/R1 +probe	UNKNOWN	FAM	25.8369	25.8118	0.0355787	7629.66	7747.96	167.297	1	40
B20	BF062	Kinase F1/R1 +probe	UNKNOWN	FAM	25.7866	25.8118	0.0355787	7866.25			1	40
C20	BF063	Kinase F1/R1 +probe	UNKNOWN	FAM	26.3165	26.3384	0.0308785	5702.74	5628.16	105.476	1	40
D20	BF063	Kinase F1/R1 +probe	UNKNOWN	FAM	26.3602	26.3384	0.0308785	5553.58			1	40
E20	BF064	Kinase F1/R1 +probe	UNKNOWN	FAM	17.9711	18.0692	0.138738	903463	852748	71722.5	1	40
F20	BF064	Kinase F1/R1 +probe	UNKNOWN	FAM	18.1673	18.0692	0.138738	802032			1	40
G20	BF065	Kinase F1/R1 +probe	UNKNOWN	FAM	17.3861	17.3286	0.0813441	1.28857e+06	1.33516e+06	65891.9	1	40
H20	BF065	Kinase F1/R1 +probe	UNKNOWN	FAM	17.271	17.3286	0.0813441	1.38175e+06			1	40
I20	BF066	Kinase F1/R1 +probe	UNKNOWN	FAM	18.7299	19.3271	0.844578	570024	423057	207842	1	40
J20	BF066	Kinase F1/R1 +probe	UNKNOWN	FAM	19.9243	19.3271	0.844578	276091			1	40
K20	BF067	Kinase F1/R1 +probe	UNKNOWN	FAM	23.8308	20.5883	4.58549	25782.5	673085	915425	1	40
L20	BF067	Kinase F1/R1 +probe	UNKNOWN	FAM	17.3459	20.5883	4.58549	1.32039e+06			1	40
M20	BF068	Kinase F1/R1 +probe	UNKNOWN	FAM	14.1854	15.0019	1.15461	8.99057e+06	6.16384e+06	3.9976e+06	1	40
N20	BF068	Kinase F1/R1 +probe	UNKNOWN	FAM	15.8183	15.0019	1.15461	3.33711e+06			1	40
O20	BF069	Kinase F1/R1 +probe	UNKNOWN	FAM	19.5276	19.8655	0.477883	351243	292150	83570	1	40
P20	BF069	Kinase F1/R1 +probe	UNKNOWN	FAM	20.2035	19.8655	0.477883	233057			1	40
A21	BF070	Kinase F1/R1 +probe	UNKNOWN	FAM	21.0848	21.1014	0.0234687	136501	135139	1924.92	1	40
B21	BF070	Kinase F1/R1 +probe	UNKNOWN	FAM	21.118	21.1014	0.0234687	133778			1	40
C21	BF071	Kinase F1/R1 +probe	UNKNOWN	FAM	20.441	20.3875	0.0757038	201764	208537	9578.53	1	40
D21	BF071	Kinase F1/R1 +probe	UNKNOWN	FAM	20.334	20.3875	0.0757038	215310			1	40
E21	BF072	Kinase F1/R1 +probe	UNKNOWN	FAM	28.06	28.7878	1.02927	1979.27	1398.7	821.061	1	40
F21	BF072	Kinase F1/R1 +probe	UNKNOWN	FAM	29.5156	28.7878	1.02927	818.119			1	40
G21	BF073	Kinase F1/R1 +probe	UNKNOWN	FAM	33.3362	33.2659	0.0993749	80.4889	84.0724	5.0679	1	40
H21	BF073	Kinase F1/R1 +probe	UNKNOWN	FAM	33.1957	33.2659	0.0993749	87.656			1	40
I21	BF074	Kinase F1/R1 +probe	UNKNOWN	FAM	14.7594	15.6326	1.23484	6.3457e+06	4.27218e+06	2.93241e+06	1	40
J21	BF074	Kinase F1/R1 +probe	UNKNOWN	FAM	16.5058	15.6326	1.23484	2.19865e+06			1	40
K21	BF075	Kinase F1/R1 +probe	UNKNOWN	FAM	32.0862	32.7214	0.898374	171.883	125.689	65.3286	1	40
L21	BF075	Kinase F1/R1 +probe	UNKNOWN	FAM	33.3567	32.7214	0.898374	79.4948			1	40
M21	BF076	Kinase F1/R1 +probe	UNKNOWN	FAM	16.3556	16.5404	0.261323	2.40848e+06	2.16651e+06	342197	1	40
N21	BF076	Kinase F1/R1 +probe	UNKNOWN	FAM	16.7251	16.5404	0.261323	1.92454e+06			1	40
O21	BF077	Kinase F1/R1 +probe	UNKNOWN	FAM	16.0903	16.306	0.305023	2.82926e+06	2.5034e+06	460835	1	40
P21	BF077	Kinase F1/R1 +probe	UNKNOWN	FAM	16.5217	16.306	0.305023	2.17754e+06			1	40
A22	BF078	Kinase F1/R1 +probe	UNKNOWN	FAM	13.2649	13.1811	0.118561	1.57189e+07	1.65609e+07	1.19071e+06	1	40
B22	BF078	Kinase F1/R1 +probe	UNKNOWN	FAM	13.0973	13.1811	0.118561	1.74028e+07			1	40
C22	BF079	Kinase F1/R1 +probe	UNKNOWN	FAM	14.912	15.5237	0.86506	5.78447e+06	4.26867e+06	2.14366e+06	1	40
D22	BF079	Kinase F1/R1 +probe	UNKNOWN	FAM	16.1354	15.5237	0.86506	2.75287e+06			1	40
E22	BF080	Kinase F1/R1 +probe	UNKNOWN	FAM	27.5116	27.7385	0.320826	2760.99	2428.68	469.958	1	40
F22	BF080	Kinase F1/R1 +probe	UNKNOWN	FAM	27.9654	27.7385	0.320826	2096.37			1	40
G22	BF081	Kinase F1/R1 +probe	UNKNOWN	FAM	16.3241	16.2318	0.130445	2.45497e+06	2.6004e+06	205668	1	40
H22	BF081	Kinase F1/R1 +probe	UNKNOWN	FAM	16.1396	16.2318	0.130445	2.74583e+06			1	40
I22	BF082	Kinase F1/R1 +probe	UNKNOWN	FAM	15.9667	16.1489	0.257587	3.04959e+06	2.74713e+06	427752	1	40
J22	BF082	Kinase F1/R1 +probe	UNKNOWN	FAM	16.331	16.1489	0.257587	2.44466e+06			1	40
K22	BF083	Kinase F1/R1 +probe	UNKNOWN	FAM	16.6226	16.778	0.219742	2.04817e+06	1.87213e+06	248953	1	40
L22	BF083	Kinase F1/R1 +probe	UNKNOWN	FAM	16.9333	16.778	0.219742	1.6961e+06			1	40
M22	BF084	Kinase F1/R1 +probe	UNKNOWN	FAM	14.9961	15.5715	0.81369	5.49657e+06	4.11518e+06	1.95358e+06	1	40
N22	BF084	Kinase F1/R1 +probe	UNKNOWN	FAM	16.1468	15.5715	0.81369	2.73379e+06			1	40
O22	BF085	Kinase F1/R1 +probe	UNKNOWN	FAM	17.0057	16.9603	0.0641333	1.62325e+06	1.66918e+06	64957.4	1	40
P22	BF085	Kinase F1/R1 +probe	UNKNOWN	FAM	16.915	16.9603	0.0641333	1.71511e+06			1	40
A23	BF086	Kinase F1/R1 +probe	UNKNOWN	FAM	36.4781	36.2188	0.366603	11.9554	14.166	3.12632	1	40
B23	BF086	Kinase F1/R1 +probe	UNKNOWN	FAM	35.9596	36.2188	0.366603	16.3766			1	40
C23	BF087	Kinase F1/R1 +probe	UNKNOWN	FAM	28.4535	28.7318	0.393518	1558.78	1335.37	315.95	1	40
D23	BF087	Kinase F1/R1 +probe	UNKNOWN	FAM	29.01	28.7318	0.393518	1111.96			1	40
E23	BF088	Kinase F1/R1 +probe	UNKNOWN	FAM	19.9351	19.8684	0.0943226	274291	285857	16356.2	1	40
F23	BF088	Kinase F1/R1 +probe	UNKNOWN	FAM	19.8017	19.8684	0.0943226	297422			1	40
G23	BF089	Kinase F1/R1 +probe	UNKNOWN	FAM	30.2767	30.3314	0.0773991	515.49	498.923	23.4295	1	40
H23	BF089	Kinase F1/R1 +probe	UNKNOWN	FAM	30.3861	30.3314	0.0773991	482.355			1	40
I23	BF090	Kinase F1/R1 +probe	UNKNOWN	FAM	36.5635	36.01	0.782836	11.3509	16.7883	7.68966	1	40
J23	BF090	Kinase F1/R1 +probe	UNKNOWN	FAM	35.4564	36.01	0.782836	22.2258			1	40
K23	BF091	Kinase F1/R1 +probe	UNKNOWN	FAM	20.2906	20.4521	0.228343	221045	201373	27819.8	1	40
L23	BF091	Kinase F1/R1 +probe	UNKNOWN	FAM	20.6136	20.4521	0.228343	181702			1	40
M23	BF092	Kinase F1/R1 +probe	UNKNOWN	FAM	25.9332	26.0163	0.117418	7196.49	6851.51	487.875	1	40
N23	BF092	Kinase F1/R1 +probe	UNKNOWN	FAM	26.0993	26.0163	0.117418	6506.53			1	40
O23	BF093	Kinase F1/R1 +probe	UNKNOWN	FAM	35.7327	35.6641	0.0969472	18.7949	19.6104	1.15325	1	40
P23	BF093	Kinase F1/R1 +probe	UNKNOWN	FAM	35.5956	35.6641	0.0969472	20.4259			1	40
A24	Long kinase 0274-1	Kinase F1/R1 +probe	STANDARD	FAM	14.7998	14.8825	0.116958	6.19197e+06	5.89625e+06	418208	1	40
B24	Long kinase 0274-1	Kinase F1/R1 +probe	STANDARD	FAM	14.9652	14.8825	0.116958	5.60053e+06			1	40
C24	Long kinase 0274-2	Kinase F1/R1 +probe	STANDARD	FAM	21.2037	21.1784	0.0358322	126997	128980	2804.86	1	40
D24	Long kinase 0274-2	Kinase F1/R1 +probe	STANDARD	FAM	21.1531	21.1784	0.0358322	130963			1	40
E24	Long kinase 0274-3	Kinase F1/R1 +probe	STANDARD	FAM	31.1605	31.49	0.465958	301.467	251.778	70.2717	1	40
F24	Long kinase 0274-3	Kinase F1/R1 +probe	STANDARD	FAM	31.8195	31.49	0.465958	202.088			1	40
G24	Long kinase 0274-4	Kinase F1/R1 +probe	STANDARD	FAM	30.5425	30.4823	0.085026	438.684	455.29	23.4853	1	40
H24	Long kinase 0274-4	Kinase F1/R1 +probe	STANDARD	FAM	30.4222	30.4823	0.085026	471.897			1	40
I24	Long kinase 0274-5	Kinase F1/R1 +probe	STANDARD	FAM	Undetermined	35.6066		#VALUE!	#VALUE!	#VALUE!	1	40
J24	Long kinase 0274-5	Kinase F1/R1 +probe	STANDARD	FAM	35.6066	35.6066		20.2892			1	40
K24	Long kinase 0274-6	Kinase F1/R1 +probe	STANDARD	FAM	Undetermined	36.9565		#VALUE!	#VALUE!	#VALUE!	1	40
L24	Long kinase 0274-6	Kinase F1/R1 +probe	STANDARD	FAM	36.9565	36.9565					1	40
M24	NTC	Kinase F1/R1 +probe	NTC	FAM	Undetermined						1	40
N24	NTC	Kinase F1/R1 +probe	NTC	FAM	Undetermined						1	40
O24	NTC	Kinase F1/R1 +probe	NTC	FAM	Undetermined						1	40
P24	NTC	Kinase F1/R1 +probe	NTC	FAM	Undetermined						1	40

## Sheet: Longum_P4
Block Type	384-Well Block
Calibration Background is expired	Yes
Calibration Background performed on	2015-09-28 10:38:58 AM NZDT
Calibration FAM is expired	Yes
Calibration FAM performed on	2015-09-28 12:44:37 PM NZDT
Calibration NED is expired	Yes
Calibration NED performed on	2015-09-28 12:27:45 PM NZDT
Calibration ROI is expired	Yes
Calibration ROI performed on	2015-09-28 10:31:42 AM NZDT
Calibration ROX is expired	Yes
Calibration ROX performed on	2015-09-28 11:50:26 AM NZDT
Calibration SYBR is expired	Yes
Calibration SYBR performed on	2015-09-28 11:35:56 AM NZDT
Calibration TAMRA is expired	Yes
Calibration TAMRA performed on	2015-09-28 12:05:53 PM NZDT
Calibration Uniformity is expired	Yes
Calibration Uniformity performed on	2015-09-28 11:17:29 AM NZDT
Calibration VIC is expired	Yes
Calibration VIC performed on	2015-09-28 12:36:53 PM NZDT
Chemistry	TAQMAN
Experiment File Name	E:\Taq sialidase - Kinase comparisons\12-Ali baby 384 P4 Taq Kinase.eds
Experiment Name	Ali baby 384 P4 Taq Kinase
Experiment Run Start Time	2016-07-27 23:10:35 PM NZST
Experiment Run Stop Time	2016-07-28 00:05:37 AM NZST
Experiment Type	Standard Curve
Instrument Name	ViiA7
Instrument Serial Number	278880388
Instrument Type	ViiA(TM) 7 System
Passive Reference	ROX
Quantification Cycle Method	Ct
Signal Smoothing On	true
Stage/ Cycle where Analysis is performed	Stage 2, Step 2
Well Position	Sample Name	Target Name	Task	Reporter	CT	Ct Mean	Ct SD	Quant by formula	Av. Q/formula	SD Q/formula	Baseline Start	Baseline End
G2	AB01	Kinase F1/R1 + probe	UNKNOWN	FAM	17.1574	17.1407	0.023609	1.48041e+06	1.49556e+06	21429.8	1	40
H2	AB01	Kinase F1/R1 + probe	UNKNOWN	FAM	17.124	17.1407	0.023609	1.51072e+06			1	40
I2	AB02	Kinase F1/R1 + probe	UNKNOWN	FAM	18.2449	18.2587	0.019513	765120	758766	8985.98	1	40
J2	AB02	Kinase F1/R1 + probe	UNKNOWN	FAM	18.2725	18.2587	0.019513	752412			1	40
K2	AB03	Kinase F1/R1 + probe	UNKNOWN	FAM	25.0466	25.0157	0.0436466	12326.7	12562	332.747	1	40
L2	AB03	Kinase F1/R1 + probe	UNKNOWN	FAM	24.9848	25.0157	0.0436466	12797.3			1	40
M2	AB04	Kinase F1/R1 + probe	UNKNOWN	FAM	16.4754	16.462	0.0188737	2.23959e+06	2.25788e+06	25864.8	1	40
N2	AB04	Kinase F1/R1 + probe	UNKNOWN	FAM	16.4487	16.462	0.0188737	2.27617e+06			1	40
O2	AB05	Kinase F1/R1 + probe	UNKNOWN	FAM	17.291	17.3187	0.0391905	1.36515e+06	1.34257e+06	31931.7	1	40
P2	AB05	Kinase F1/R1 + probe	UNKNOWN	FAM	17.3464	17.3187	0.0391905	1.31999e+06			1	40
A3	AB06	Kinase F1/R1 + probe	UNKNOWN	FAM	36.5971	35.5572	1.47062	11.1223	25.212	19.9259	1	40
B3	AB06	Kinase F1/R1 + probe	UNKNOWN	FAM	34.5173	35.5572	1.47062	39.3017			1	40
C3	AB07	Kinase F1/R1 + probe	UNKNOWN	FAM	27.947	27.9697	0.0321584	2119.88	2091.02	40.8104	1	40
D3	AB07	Kinase F1/R1 + probe	UNKNOWN	FAM	27.9925	27.9697	0.0321584	2062.17			1	40
E3	AB08	Kinase F1/R1 + probe	UNKNOWN	FAM	31.7315	31.5556	0.248711	213.17	238.535	35.8719	1	40
F3	AB08	Kinase F1/R1 + probe	UNKNOWN	FAM	31.3798	31.5556	0.248711	263.901			1	40
G3	AB09	Kinase F1/R1 + probe	UNKNOWN	FAM	29.4585	29.5639	0.148981	846.973	796.137	71.892	1	40
H3	AB09	Kinase F1/R1 + probe	UNKNOWN	FAM	29.6692	29.5639	0.148981	745.302			1	40
I3	AB10	Kinase F1/R1 + probe	UNKNOWN	FAM	16.5246	16.7395	0.303828	2.17363e+06	1.92414e+06	352831	1	40
J3	AB10	Kinase F1/R1 + probe	UNKNOWN	FAM	16.9543	16.7395	0.303828	1.67466e+06			1	40
K3	AB11	Kinase F1/R1 + probe	UNKNOWN	FAM	33.6373	33.9241	0.405678	67.0465	57.1889	13.9408	1	40
L3	AB11	Kinase F1/R1 + probe	UNKNOWN	FAM	34.211	33.9241	0.405678	47.3313			1	40
M3	AB12	Kinase F1/R1 + probe	UNKNOWN	FAM	32.9667	32.488	0.67699	100.726	140.412	56.1249	1	40
N3	AB12	Kinase F1/R1 + probe	UNKNOWN	FAM	32.0093	32.488	0.67699	180.099			1	40
O3	AB13	Kinase F1/R1 + probe	UNKNOWN	FAM	34.8994	35.6099	1.00485	31.1671	22.1613	12.7361	1	40
P3	AB13	Kinase F1/R1 + probe	UNKNOWN	FAM	36.3204	35.6099	1.00485	13.1556			1	40
A4	AB14	Kinase F1/R1 + probe	UNKNOWN	FAM	34.4588	34.5984	0.197393	40.7213	37.5479	4.4878	1	40
B4	AB14	Kinase F1/R1 + probe	UNKNOWN	FAM	34.738	34.5984	0.197393	34.3746			1	40
C4	AB15	Kinase F1/R1 + probe	UNKNOWN	FAM	21.0007	20.8704	0.184255	143654	155961	17405.5	1	40
D4	AB15	Kinase F1/R1 + probe	UNKNOWN	FAM	20.7401	20.8704	0.184255	168269			1	40
E4	AB16	Kinase F1/R1 + probe	UNKNOWN	FAM	27.4185	27.3858	0.0462536	2921.55	2980.71	83.6689	1	40
F4	AB16	Kinase F1/R1 + probe	UNKNOWN	FAM	27.3531	27.3858	0.0462536	3039.87			1	40
G4	AB17	Kinase F1/R1 + probe	UNKNOWN	FAM	15.232	15.2371	0.00715755	4.76329e+06	4.7487e+06	20631	1	40
H4	AB17	Kinase F1/R1 + probe	UNKNOWN	FAM	15.2421	15.2371	0.00715755	4.73412e+06			1	40
I4	AB18	Kinase F1/R1 + probe	UNKNOWN	FAM	16.303	16.2638	0.0553169	2.48664e+06	2.5471e+06	85502	1	40
J4	AB18	Kinase F1/R1 + probe	UNKNOWN	FAM	16.2247	16.2638	0.0553169	2.60756e+06			1	40
K4	AB19	Kinase F1/R1 + probe	UNKNOWN	FAM	16.2536	16.264	0.0147291	2.56222e+06	2.54612e+06	22762.6	1	40
L4	AB19	Kinase F1/R1 + probe	UNKNOWN	FAM	16.2745	16.264	0.0147291	2.53003e+06			1	40
M4	AB20	Kinase F1/R1 + probe	UNKNOWN	FAM	26.6264	26.6699	0.0615789	4725.12	4603.48	172.019	1	40
N4	AB20	Kinase F1/R1 + probe	UNKNOWN	FAM	26.7135	26.6699	0.0615789	4481.85			1	40
O4	AB21	Kinase F1/R1 + probe	UNKNOWN	FAM	15.598	15.6204	0.03166	3.81453e+06	3.76339e+06	72313	1	40
P4	AB21	Kinase F1/R1 + probe	UNKNOWN	FAM	15.6428	15.6204	0.03166	3.71226e+06			1	40
A5	AB22	Kinase F1/R1 + probe	UNKNOWN	FAM	15.3093	15.3733	0.0904782	4.54497e+06	4.37516e+06	240145	1	40
B5	AB22	Kinase F1/R1 + probe	UNKNOWN	FAM	15.4373	15.3733	0.0904782	4.20535e+06			1	40
C5	AB23	Kinase F1/R1 + probe	UNKNOWN	FAM	32.4739	32.7611	0.406225	135.847	115.851	28.2781	1	40
D5	AB23	Kinase F1/R1 + probe	UNKNOWN	FAM	33.0483	32.7611	0.406225	95.8552			1	40
E5	AB24	Kinase F1/R1 + probe	UNKNOWN	FAM	28.9223	28.862	0.0852917	1172.77	1217.31	62.9894	1	40
F5	AB24	Kinase F1/R1 + probe	UNKNOWN	FAM	28.8017	28.862	0.0852917	1261.85			1	40
G5	AB25	Kinase F1/R1 + probe	UNKNOWN	FAM	18.3914	18.4215	0.0424975	700008	687471	17730.4	1	40
H5	AB25	Kinase F1/R1 + probe	UNKNOWN	FAM	18.4515	18.4215	0.0424975	674934			1	40
I5	AB26	Kinase F1/R1 + probe	UNKNOWN	FAM	32.5327	32.127	0.573676	131.082	172.783	58.975	1	40
J5	AB26	Kinase F1/R1 + probe	UNKNOWN	FAM	31.7214	32.127	0.573676	214.485			1	40
K5	AB27	Kinase F1/R1 + probe	UNKNOWN	FAM	36.2803	35.8467	0.613194	13.4799	18.1489	6.60288	1	40
L5	AB27	Kinase F1/R1 + probe	UNKNOWN	FAM	35.4131	35.8467	0.613194	22.8178			1	40
M5	AB28	Kinase F1/R1 + probe	UNKNOWN	FAM	17.2615	17.2961	0.0489821	1.38979e+06	1.36118e+06	40461.4	1	40
N5	AB28	Kinase F1/R1 + probe	UNKNOWN	FAM	17.3308	17.2961	0.0489821	1.33257e+06			1	40
O5	AB29	Kinase F1/R1 + probe	UNKNOWN	FAM	33.599	34.3497	1.06164	68.6205	48.1035	29.0154	1	40
P5	AB29	Kinase F1/R1 + probe	UNKNOWN	FAM	35.1004	34.3497	1.06164	27.5865			1	40
A6	AB30	Kinase F1/R1 + probe	UNKNOWN	FAM	36.6375	36.3779	0.367121	10.8524	12.8624	2.84258	1	40
B6	AB30	Kinase F1/R1 + probe	UNKNOWN	FAM	36.1183	36.3779	0.367121	14.8725			1	40
C6	AB31	Kinase F1/R1 + probe	UNKNOWN	FAM	24.3942	24.3232	0.100327	18315.1	19138.7	1164.7	1	40
D6	AB31	Kinase F1/R1 + probe	UNKNOWN	FAM	24.2523	24.3232	0.100327	19962.3			1	40
E6	AB32	Kinase F1/R1 + probe	UNKNOWN	FAM	19.5588	19.6926	0.189228	344663	318827	36537.6	1	40
F6	AB32	Kinase F1/R1 + probe	UNKNOWN	FAM	19.8264	19.6926	0.189228	292991			1	40
G6	AB33	Kinase F1/R1 + probe	UNKNOWN	FAM	16.1721	16.193	0.0295028	2.69213e+06	2.65847e+06	47601.7	1	40
H6	AB33	Kinase F1/R1 + probe	UNKNOWN	FAM	16.2139	16.193	0.0295028	2.62482e+06			1	40
I6	AB34	Kinase F1/R1 + probe	UNKNOWN	FAM	18.4819	18.4528	0.0411313	662605	674511	16837	1	40
J6	AB34	Kinase F1/R1 + probe	UNKNOWN	FAM	18.4237	18.4528	0.0411313	686417			1	40
K6	AB35	Kinase F1/R1 + probe	UNKNOWN	FAM	17.8374	17.8962	0.0831379	979798	946056	47718.3	1	40
L6	AB35	Kinase F1/R1 + probe	UNKNOWN	FAM	17.955	17.8962	0.0831379	912314			1	40
M6	AB36	Kinase F1/R1 + probe	UNKNOWN	FAM	25.9667	25.9556	0.0157555	7051.84	7099.85	67.8945	1	40
N6	AB36	Kinase F1/R1 + probe	UNKNOWN	FAM	25.9444	25.9556	0.0157555	7147.86			1	40
O6	AB37	Kinase F1/R1 + probe	UNKNOWN	FAM	16.3212	16.195	0.178512	2.45924e+06	2.66285e+06	287951	1	40
P6	AB37	Kinase F1/R1 + probe	UNKNOWN	FAM	16.0688	16.195	0.178512	2.86647e+06			1	40
A7	AB38	Kinase F1/R1 + probe	UNKNOWN	FAM	20.7593	20.6038	0.219913	166324	183602	24434	1	40
B7	AB38	Kinase F1/R1 + probe	UNKNOWN	FAM	20.4483	20.6038	0.219913	200879			1	40
C7	AB39	Kinase F1/R1 + probe	UNKNOWN	FAM	34.7745	35.325	0.778477	33.6211	25.4281	11.5867	1	40
D7	AB39	Kinase F1/R1 + probe	UNKNOWN	FAM	35.8754	35.325	0.778477	17.235			1	40
E7	AB40	Kinase F1/R1 + probe	UNKNOWN	FAM	28.3432	28.3043	0.0549811	1666.75	1707.02	56.954	1	40
F7	AB40	Kinase F1/R1 + probe	UNKNOWN	FAM	28.2654	28.3043	0.0549811	1747.29			1	40
G7	AB41	Kinase F1/R1 + probe	UNKNOWN	FAM	16.1284	16.0672	0.0865339	2.76461e+06	2.87119e+06	150730	1	40
H7	AB41	Kinase F1/R1 + probe	UNKNOWN	FAM	16.006	16.0672	0.0865339	2.97777e+06			1	40
I7	AB42	Kinase F1/R1 + probe	UNKNOWN	FAM	15.4563	15.5141	0.0817871	4.15706e+06	4.01614e+06	199283	1	40
J7	AB42	Kinase F1/R1 + probe	UNKNOWN	FAM	15.572	15.5141	0.0817871	3.87523e+06			1	40
K7	AB43	Kinase F1/R1 + probe	UNKNOWN	FAM	25.422	25.4981	0.107622	9814.62	9381.6	612.379	1	40
L7	AB43	Kinase F1/R1 + probe	UNKNOWN	FAM	25.5742	25.4981	0.107622	8948.58			1	40
M7	AB44	Kinase F1/R1 + probe	UNKNOWN	FAM	31.9727	32.2115	0.33765	184.14	160.974	32.7606	1	40
N7	AB44	Kinase F1/R1 + probe	UNKNOWN	FAM	32.4502	32.2115	0.33765	137.809			1	40
O7	AB45	Kinase F1/R1 + probe	UNKNOWN	FAM	32.335	32.337	0.00291319	147.794	147.609	0.261005	1	40
P7	AB45	Kinase F1/R1 + probe	UNKNOWN	FAM	32.3391	32.337	0.00291319	147.425			1	40
A8	AB46	Kinase F1/R1 + probe	UNKNOWN	FAM	30.1804	30.0235	0.221815	546.512	603.822	81.0482	1	40
B8	AB46	Kinase F1/R1 + probe	UNKNOWN	FAM	29.8667	30.0235	0.221815	661.131			1	40
C8	AB47	Kinase F1/R1 + probe	UNKNOWN	FAM	15.2273	15.2888	0.0870916	4.77709e+06	4.60504e+06	243310	1	40
D8	AB47	Kinase F1/R1 + probe	UNKNOWN	FAM	15.3504	15.2888	0.0870916	4.43299e+06			1	40
E8	AB48	Kinase F1/R1 + probe	UNKNOWN	FAM	30.9812	30.9912	0.014187	336.129	334.095	2.87672	1	40
F8	AB48	Kinase F1/R1 + probe	UNKNOWN	FAM	31.0013	30.9912	0.014187	332.061			1	40
G8	AB49	Kinase F1/R1 + probe	UNKNOWN	FAM	19.0751	19.0593	0.0222495	462272	466729	6302.56	1	40
H8	AB49	Kinase F1/R1 + probe	UNKNOWN	FAM	19.0436	19.0593	0.0222495	471185			1	40
I8	AB50	Kinase F1/R1 + probe	UNKNOWN	FAM	30.7253	30.7409	0.0220566	392.604	388.922	5.20649	1	40
J8	AB50	Kinase F1/R1 + probe	UNKNOWN	FAM	30.7565	30.7409	0.0220566	385.241			1	40
K8	AB51	Kinase F1/R1 + probe	UNKNOWN	FAM	15.3128	15.2914	0.0301893	4.53551e+06	4.59504e+06	84191.8	1	40
L8	AB51	Kinase F1/R1 + probe	UNKNOWN	FAM	15.2701	15.2914	0.0301893	4.65457e+06			1	40
M8	AB52	Kinase F1/R1 + probe	UNKNOWN	FAM	19.4919	19.3824	0.154843	358945	384457	36078.7	1	40
N8	AB52	Kinase F1/R1 + probe	UNKNOWN	FAM	19.2729	19.3824	0.154843	409968			1	40
O8	AB53	Kinase F1/R1 + probe	UNKNOWN	FAM	31.4493	31.675	0.319226	253	222.681	42.8775	1	40
P8	AB53	Kinase F1/R1 + probe	UNKNOWN	FAM	31.9007	31.675	0.319226	192.362			1	40
A9	AB54	Kinase F1/R1 + probe	UNKNOWN	FAM	14.7823	14.7735	0.0123831	6.25826e+06	6.2917e+06	47286.5	1	40
B9	AB54	Kinase F1/R1 + probe	UNKNOWN	FAM	14.7648	14.7735	0.0123831	6.32514e+06			1	40
C9	AB55	Kinase F1/R1 + probe	UNKNOWN	FAM	31.1551	31.175	0.0281851	302.464	298.85	5.11206	1	40
D9	AB55	Kinase F1/R1 + probe	UNKNOWN	FAM	31.1949	31.175	0.0281851	295.235			1	40
E9	AB56	Kinase F1/R1 + probe	UNKNOWN	FAM	24.1881	24.2546	0.09415	20756	19950.3	1139.43	1	40
F9	AB56	Kinase F1/R1 + probe	UNKNOWN	FAM	24.3212	24.2546	0.09415	19144.6			1	40
G9	AB57	Kinase F1/R1 + probe	UNKNOWN	FAM	15.9762	15.9523	0.0337822	3.0322e+06	3.0768e+06	63082.3	1	40
H9	AB57	Kinase F1/R1 + probe	UNKNOWN	FAM	15.9284	15.9523	0.0337822	3.12141e+06			1	40
I9	AB58	Kinase F1/R1 + probe	UNKNOWN	FAM	17.7217	17.6868	0.0494501	1.05106e+06	1.07385e+06	32224.9	1	40
J9	AB58	Kinase F1/R1 + probe	UNKNOWN	FAM	17.6518	17.6868	0.0494501	1.09664e+06			1	40
K9	AB59	Kinase F1/R1 + probe	UNKNOWN	FAM	18.3185	18.2912	0.038593	731695	744017	17426.4	1	40
L9	AB59	Kinase F1/R1 + probe	UNKNOWN	FAM	18.2639	18.2912	0.038593	756340			1	40
M9	AB60	Kinase F1/R1 + probe	UNKNOWN	FAM	18.1184	18.0125	0.149761	826167	882832	80136.8	1	40
N9	AB60	Kinase F1/R1 + probe	UNKNOWN	FAM	17.9066	18.0125	0.149761	939497			1	40
O9	AB61	Kinase F1/R1 + probe	UNKNOWN	FAM	33.9103	33.679	0.327078	56.8093	66.0159	13.0201	1	40
P9	AB61	Kinase F1/R1 + probe	UNKNOWN	FAM	33.4477	33.679	0.327078	75.2225			1	40
A10	AB62	Kinase F1/R1 + probe	UNKNOWN	FAM	31.7709	31.7198	0.0723631	208.13	214.799	9.43122	1	40
B10	AB62	Kinase F1/R1 + probe	UNKNOWN	FAM	31.6686	31.7198	0.0723631	221.468			1	40
C10	AB63	Kinase F1/R1 + probe	UNKNOWN	FAM	31.5125	31.4552	0.0810312	243.475	252.244	12.4008	1	40
D10	AB63	Kinase F1/R1 + probe	UNKNOWN	FAM	31.3979	31.4552	0.0810312	261.013			1	40
E10	AB64	Kinase F1/R1 + probe	UNKNOWN	FAM	20.2627	20.2247	0.053867	224820	230139	7523.01	1	40
F10	AB64	Kinase F1/R1 + probe	UNKNOWN	FAM	20.1866	20.2247	0.053867	235459			1	40
G10	AB65	Kinase F1/R1 + probe	UNKNOWN	FAM	20.5764	20.5456	0.0435792	185850	189392	5008.88	1	40
H10	AB65	Kinase F1/R1 + probe	UNKNOWN	FAM	20.5147	20.5456	0.0435792	192934			1	40
I10	AB66	Kinase F1/R1 + probe	UNKNOWN	FAM	33.1709	32.9129	0.36482	88.984	105.345	23.1375	1	40
J10	AB66	Kinase F1/R1 + probe	UNKNOWN	FAM	32.655	32.9129	0.36482	121.705			1	40
K10	AB67	Kinase F1/R1 + probe	UNKNOWN	FAM	18.3269	18.1762	0.213058	727974	801016	103296	1	40
L10	AB67	Kinase F1/R1 + probe	UNKNOWN	FAM	18.0256	18.1762	0.213058	874057			1	40
M10	AB68	Kinase F1/R1 + probe	UNKNOWN	FAM	35.4857	35.5443	0.0829909	21.8349	21.0843	1.06159	1	40
N10	AB68	Kinase F1/R1 + probe	UNKNOWN	FAM	35.603	35.5443	0.0829909	20.3336			1	40
O10	AB69	Kinase F1/R1 + probe	UNKNOWN	FAM	31.5801	32.007	0.603768	233.694	186.437	66.8319	1	40
P10	AB69	Kinase F1/R1 + probe	UNKNOWN	FAM	32.4339	32.007	0.603768	139.18			1	40
A11	AB70	Kinase F1/R1 + probe	UNKNOWN	FAM	20.3427	20.3263	0.0232799	214168	216330	3056.51	1	40
B11	AB70	Kinase F1/R1 + probe	UNKNOWN	FAM	20.3098	20.3263	0.0232799	218491			1	40
C11	AB71	Kinase F1/R1 + probe	UNKNOWN	FAM	19.9171	19.8923	0.0351565	277294	281542	6007.18	1	40
D11	AB71	Kinase F1/R1 + probe	UNKNOWN	FAM	19.8674	19.8923	0.0351565	285790			1	40
E11	AB72	Kinase F1/R1 + probe	UNKNOWN	FAM	33.352	33.0635	0.408017	79.7198	96.4365	23.6409	1	40
F11	AB72	Kinase F1/R1 + probe	UNKNOWN	FAM	32.775	33.0635	0.408017	113.153			1	40
G11	AB73	Kinase F1/R1 + probe	UNKNOWN	FAM	18.9343	18.9135	0.0294596	503495	509942	9117.27	1	40
H11	AB73	Kinase F1/R1 + probe	UNKNOWN	FAM	18.8927	18.9135	0.0294596	516389			1	40
I11	AB74	Kinase F1/R1 + probe	UNKNOWN	FAM	16.4617	16.3894	0.102126	2.2583e+06	2.36175e+06	146300	1	40
J11	AB74	Kinase F1/R1 + probe	UNKNOWN	FAM	16.3172	16.3894	0.102126	2.4652e+06			1	40
K11	AB75	Kinase F1/R1 + probe	UNKNOWN	FAM	28.2287	28.0622	0.235384	1786.72	1986.75	282.878	1	40
L11	AB75	Kinase F1/R1 + probe	UNKNOWN	FAM	27.8958	28.0622	0.235384	2186.77			1	40
M11	AB76	Kinase F1/R1 + probe	UNKNOWN	FAM	19.9176	19.9181	0.000693231	277216	277133	116.561	1	40
N11	AB76	Kinase F1/R1 + probe	UNKNOWN	FAM	19.9186	19.9181	0.000693231	277051			1	40
O11	AB77	Kinase F1/R1 + probe	UNKNOWN	FAM	20.4311	20.3885	0.0601817	202987	208367	7609.33	1	40
P11	AB77	Kinase F1/R1 + probe	UNKNOWN	FAM	20.346	20.3885	0.0601817	213748			1	40
A1	BF094	Kinase F1/R1 + probe	UNKNOWN	FAM	35.0659	35.2887	0.315035	28.1708	24.8335	4.71968	1	40
B1	BF094	Kinase F1/R1 + probe	UNKNOWN	FAM	35.5114	35.2887	0.315035	21.4962			1	40
C1	BF095	Kinase F1/R1 + probe	UNKNOWN	FAM	36.0505	35.3435	0.999801	15.4978	26.0276	14.8914	1	40
D1	BF095	Kinase F1/R1 + probe	UNKNOWN	FAM	34.6365	35.3435	0.999801	36.5573			1	40
E1	BF096	Kinase F1/R1 + probe	UNKNOWN	FAM	22.4718	22.5053	0.0473946	58822	57649.6	1658.12	1	40
F1	BF096	Kinase F1/R1 + probe	UNKNOWN	FAM	22.5388	22.5053	0.0473946	56477.1			1	40
G1	BF097	Kinase F1/R1 + probe	UNKNOWN	FAM	18.0502	18.1469	0.136753	861074	813390	67435.4	1	40
H1	BF097	Kinase F1/R1 + probe	UNKNOWN	FAM	18.2436	18.1469	0.136753	765706			1	40
I1	BF098	Kinase F1/R1 + probe	UNKNOWN	FAM	18.7111	18.7785	0.095349	576550	553896	32037.3	1	40
J1	BF098	Kinase F1/R1 + probe	UNKNOWN	FAM	18.846	18.7785	0.095349	531242			1	40
K1	BF099	Kinase F1/R1 + probe	UNKNOWN	FAM	17.1927	16.8401	0.498634	1.44904e+06	1.83608e+06	547351	1	40
L1	BF099	Kinase F1/R1 + probe	UNKNOWN	FAM	16.4875	16.8401	0.498634	2.22311e+06			1	40
M1	BF100	Kinase F1/R1 + probe	UNKNOWN	FAM	20.3867	20.6552	0.379736	208527	179525	41014.7	1	40
N1	BF100	Kinase F1/R1 + probe	UNKNOWN	FAM	20.9237	20.6552	0.379736	150524			1	40
O1	BF101	Kinase F1/R1 + probe	UNKNOWN	FAM	19.9368	19.857	0.112821	274008	287939	19701.8	1	40
P1	BF101	Kinase F1/R1 + probe	UNKNOWN	FAM	19.7772	19.857	0.112821	301870			1	40
A2	BF102	Kinase F1/R1 + probe	UNKNOWN	FAM	28.7262	28.9003	0.246258	1321.05	1195.2	177.98	1	40
B2	BF102	Kinase F1/R1 + probe	UNKNOWN	FAM	29.0744	28.9003	0.246258	1069.35			1	40
C2	BF103	Kinase F1/R1 + probe	UNKNOWN	FAM	36.5728	36.5728		11.2873	#VALUE!	#VALUE!	1	40
D2	BF103	Kinase F1/R1 + probe	UNKNOWN	FAM	Undetermined	36.5728		#VALUE!			1	40
E2	BF104	Kinase F1/R1 + probe	UNKNOWN	FAM	17.3692	17.4862	0.165577	1.30187e+06	1.21563e+06	121962	1	40
F2	BF104	Kinase F1/R1 + probe	UNKNOWN	FAM	17.6033	17.4862	0.165577	1.12939e+06			1	40
A12	Long kinase 0274-1	Kinase F1/R1 + probe	STANDARD	FAM	14.9285	14.9586	0.042571	5.72678e+06	5.62404e+06	145301	1	40
B12	Long kinase 0274-1	Kinase F1/R1 + probe	STANDARD	FAM	14.9887	14.9586	0.042571	5.52129e+06			1	40
C12	Long kinase 0274-2	Kinase F1/R1 + probe	STANDARD	FAM	21.3477	21.2312	0.164772	116370	125210	12501.1	1	40
D12	Long kinase 0274-2	Kinase F1/R1 + probe	STANDARD	FAM	21.1147	21.2312	0.164772	134049			1	40
E12	Long kinase 0274-3	Kinase F1/R1 + probe	STANDARD	FAM	33.5097	33.8185	0.436741	72.4459	61.1216	16.015	1	40
F12	Long kinase 0274-3	Kinase F1/R1 + probe	STANDARD	FAM	34.1273	33.8185	0.436741	49.7973			1	40
G12	Long kinase 0274-4	Kinase F1/R1 + probe	STANDARD	FAM	30.757	30.7083	0.068781	385.133	396.844	16.5622	1	40
H12	Long kinase 0274-4	Kinase F1/R1 + probe	STANDARD	FAM	30.6597	30.7083	0.068781	408.555			1	40
I12	Long kinase 0274-5	Kinase F1/R1 + probe	STANDARD	FAM	36.469	35.9056	0.796784	12.021	17.9211	8.34404	1	40
J12	Long kinase 0274-5	Kinase F1/R1 + probe	STANDARD	FAM	35.3422	35.9056	0.796784	23.8212			1	40
K12	Long kinase 0274-6	Kinase F1/R1 + probe	STANDARD	FAM	Undetermined			#VALUE!	#VALUE!	#VALUE!	1	40
L12	Long kinase 0274-6	Kinase F1/R1 + probe	STANDARD	FAM	Undetermined			#VALUE!			1	40
M12	NTC	Kinase F1/R1 + probe	NTC	FAM	Undetermined			#VALUE!	#VALUE!	#VALUE!	1	40
N12	NTC	Kinase F1/R1 + probe	NTC	FAM	Undetermined			#VALUE!			1	40
O12	NTC	Kinase F1/R1 + probe	NTC	FAM	Undetermined			#VALUE!	#VALUE!	#VALUE!	1	40
P12	NTC	Kinase F1/R1 + probe	NTC	FAM	Undetermined			#VALUE!			1	40

## Sheet: Infantis_P1
Block Type	384-Well Block
Calibration Background is expired	Yes
Calibration Background performed on	2015-09-28 10:38:58 AM NZDT
Calibration FAM is expired	Yes
Calibration FAM performed on	2015-09-28 12:44:37 PM NZDT
Calibration NED is expired	Yes
Calibration NED performed on	2015-09-28 12:27:45 PM NZDT
Calibration ROI is expired	Yes
Calibration ROI performed on	2015-09-28 10:31:42 AM NZDT
Calibration ROX is expired	Yes
Calibration ROX performed on	2015-09-28 11:50:26 AM NZDT
Calibration SYBR is expired	Yes
Calibration SYBR performed on	2015-09-28 11:35:56 AM NZDT
Calibration TAMRA is expired	Yes
Calibration TAMRA performed on	2015-09-28 12:05:53 PM NZDT
Calibration Uniformity is expired	Yes
Calibration Uniformity performed on	2015-09-28 11:17:29 AM NZDT
Calibration VIC is expired	Yes
Calibration VIC performed on	2015-09-28 12:36:53 PM NZDT
Chemistry	TAQMAN
Experiment File Name	C:\Users\room811\Desktop\qPCR_longum_infantis\01-Sing infants 384 P1 Taq Sialidase.eds
Experiment Name	Sing infants 384 P1 Taq Sialidase
Experiment Run Start Time	2016-07-20 22:11:38 PM NZST
Experiment Run Stop Time	2016-07-20 23:08:15 PM NZST
Experiment Type	Standard Curve
Instrument Name	ViiA7
Instrument Serial Number	278880388
Instrument Type	ViiA(TM) 7 System
Passive Reference	ROX
Quantification Cycle Method	Ct
Signal Smoothing On	true
Stage/ Cycle where Analysis is performed	Stage 2, Step 2
Well Position	Sample Name	Target Name	Task	CT	Ct Mean	Ct SD	Quant by formula	Av. Q/formula	SD Q/formula	Baseline Start	Baseline End
A1	2-2	Sialidase F1/R1 +probe	UNKNOWN	Undetermined			#VALUE!	#VALUE!	#VALUE!	3	39
B1	2-2	Sialidase F1/R1 +probe	UNKNOWN	Undetermined			#VALUE!			3	39
C1	2-5	Sialidase F1/R1 +probe	UNKNOWN	Undetermined			#VALUE!	#VALUE!	#VALUE!	3	39
D1	2-5	Sialidase F1/R1 +probe	UNKNOWN	Undetermined			#VALUE!			3	39
E1	2-7	Sialidase F1/R1 +probe	UNKNOWN	Undetermined			#VALUE!	#VALUE!	#VALUE!	3	39
F1	2-7	Sialidase F1/R1 +probe	UNKNOWN	Undetermined			#VALUE!			3	39
G1	3-1	Sialidase F1/R1 +probe	UNKNOWN	Undetermined			#VALUE!	#VALUE!	#VALUE!	3	39
H1	3-1	Sialidase F1/R1 +probe	UNKNOWN	Undetermined			#VALUE!			3	39
I1	3-5	Sialidase F1/R1 +probe	UNKNOWN	Undetermined			#VALUE!	#VALUE!	#VALUE!	3	39
J1	3-5	Sialidase F1/R1 +probe	UNKNOWN	Undetermined			#VALUE!			3	39
K1	3-7	Sialidase F1/R1 +probe	UNKNOWN	Undetermined			#VALUE!	#VALUE!	#VALUE!	3	39
L1	3-7	Sialidase F1/R1 +probe	UNKNOWN	Undetermined			#VALUE!			3	39
M1	4-2	Sialidase F1/R1 +probe	UNKNOWN	Undetermined			#VALUE!	#VALUE!	#VALUE!	3	39
N1	4-2	Sialidase F1/R1 +probe	UNKNOWN	Undetermined			#VALUE!			3	39
O1	4-5	Sialidase F1/R1 +probe	UNKNOWN	Undetermined			#VALUE!	#VALUE!	#VALUE!	3	39
P1	4-5	Sialidase F1/R1 +probe	UNKNOWN	Undetermined			#VALUE!			3	39
A2	4-7	Sialidase F1/R1 +probe	UNKNOWN	Undetermined			#VALUE!	#VALUE!	#VALUE!	3	39
B2	4-7	Sialidase F1/R1 +probe	UNKNOWN	Undetermined			#VALUE!			3	39
C2	7-2	Sialidase F1/R1 +probe	UNKNOWN	Undetermined			#VALUE!	#VALUE!	#VALUE!	3	39
D2	7-2	Sialidase F1/R1 +probe	UNKNOWN	Undetermined			#VALUE!			3	39
E2	7-5	Sialidase F1/R1 +probe	UNKNOWN	Undetermined	35.853		#VALUE!	#VALUE!	#VALUE!	3	39
F2	7-5	Sialidase F1/R1 +probe	UNKNOWN	35.853	35.853		8.26671			3	33
G2	7-7	Sialidase F1/R1 +probe	UNKNOWN	Undetermined			#VALUE!	#VALUE!	#VALUE!	3	39
H2	7-7	Sialidase F1/R1 +probe	UNKNOWN	Undetermined			#VALUE!			3	39
I2	10-1	Sialidase F1/R1 +probe	UNKNOWN	Undetermined			#VALUE!	#VALUE!	#VALUE!	3	39
J2	10-1	Sialidase F1/R1 +probe	UNKNOWN	Undetermined			#VALUE!			3	39
K2	10-5	Sialidase F1/R1 +probe	UNKNOWN	Undetermined			#VALUE!	#VALUE!	#VALUE!	3	39
L2	10-5	Sialidase F1/R1 +probe	UNKNOWN	Undetermined			#VALUE!			3	39
M2	10-7	Sialidase F1/R1 +probe	UNKNOWN	Undetermined			#VALUE!	#VALUE!	#VALUE!	3	39
N2	10-7	Sialidase F1/R1 +probe	UNKNOWN	Undetermined			#VALUE!			3	39
O2	11-1	Sialidase F1/R1 +probe	UNKNOWN	Undetermined			#VALUE!	#VALUE!	#VALUE!	3	39
P2	11-1	Sialidase F1/R1 +probe	UNKNOWN	Undetermined			#VALUE!			3	39
A3	11-5	Sialidase F1/R1 +probe	UNKNOWN	Undetermined			#VALUE!	#VALUE!	#VALUE!	3	39
B3	11-5	Sialidase F1/R1 +probe	UNKNOWN	Undetermined			#VALUE!			3	39
C3	11-7	Sialidase F1/R1 +probe	UNKNOWN	Undetermined			#VALUE!	#VALUE!	#VALUE!	3	39
D3	11-7	Sialidase F1/R1 +probe	UNKNOWN	Undetermined			#VALUE!			3	39
E3	13-1	Sialidase F1/R1 +probe	UNKNOWN	Undetermined			#VALUE!	#VALUE!	#VALUE!	3	39
F3	13-1	Sialidase F1/R1 +probe	UNKNOWN	Undetermined			#VALUE!			3	39
G3	13-5	Sialidase F1/R1 +probe	UNKNOWN	Undetermined			#VALUE!	#VALUE!	#VALUE!	3	39
H3	13-5	Sialidase F1/R1 +probe	UNKNOWN	Undetermined			#VALUE!			3	39
I3	13-7	Sialidase F1/R1 +probe	UNKNOWN	Undetermined			#VALUE!	#VALUE!	#VALUE!	3	39
J3	13-7	Sialidase F1/R1 +probe	UNKNOWN	Undetermined			#VALUE!			3	39
K3	14-1	Sialidase F1/R1 +probe	UNKNOWN	Undetermined			#VALUE!	#VALUE!	#VALUE!	3	39
L3	14-1	Sialidase F1/R1 +probe	UNKNOWN	Undetermined			#VALUE!			3	39
M3	14-5	Sialidase F1/R1 +probe	UNKNOWN	35.0293	35.0607	0.0444909	13.6056	13.3516	0.359264	3	32
N3	14-5	Sialidase F1/R1 +probe	UNKNOWN	35.0922	35.0607	0.0444909	13.0975			3	32
O3	14-7	Sialidase F1/R1 +probe	UNKNOWN	Undetermined			#VALUE!	#VALUE!	#VALUE!	3	39
P3	14-7	Sialidase F1/R1 +probe	UNKNOWN	Undetermined			#VALUE!			3	39
A4	16-1	Sialidase F1/R1 +probe	UNKNOWN	Undetermined			#VALUE!	#VALUE!	#VALUE!	3	39
B4	16-1	Sialidase F1/R1 +probe	UNKNOWN	Undetermined			#VALUE!			3	39
C4	16-5	Sialidase F1/R1 +probe	UNKNOWN	Undetermined			#VALUE!	#VALUE!	#VALUE!	3	39
D4	16-5	Sialidase F1/R1 +probe	UNKNOWN	Undetermined			#VALUE!			3	39
E4	16-7	Sialidase F1/R1 +probe	UNKNOWN	Undetermined			#VALUE!	#VALUE!	#VALUE!	3	39
F4	16-7	Sialidase F1/R1 +probe	UNKNOWN	Undetermined			#VALUE!			3	39
G4	19-1	Sialidase F1/R1 +probe	UNKNOWN	Undetermined			#VALUE!	#VALUE!	#VALUE!	3	39
H4	19-1	Sialidase F1/R1 +probe	UNKNOWN	Undetermined			#VALUE!			3	39
I4	19-5	Sialidase F1/R1 +probe	UNKNOWN	Undetermined			#VALUE!	#VALUE!	#VALUE!	3	39
J4	19-5	Sialidase F1/R1 +probe	UNKNOWN	Undetermined			#VALUE!			3	39
K4	19-7	Sialidase F1/R1 +probe	UNKNOWN	Undetermined			#VALUE!	#VALUE!	#VALUE!	3	39
L4	19-7	Sialidase F1/R1 +probe	UNKNOWN	Undetermined			#VALUE!			3	39
M4	25-1	Sialidase F1/R1 +probe	UNKNOWN	35.3688	35.3688		11.0798	#VALUE!	#VALUE!	3	32
N4	25-1	Sialidase F1/R1 +probe	UNKNOWN	Undetermined	35.3688		#VALUE!			3	39
O4	25-5	Sialidase F1/R1 +probe	UNKNOWN	Undetermined			#VALUE!	#VALUE!	#VALUE!	3	39
P4	25-5	Sialidase F1/R1 +probe	UNKNOWN	Undetermined			#VALUE!			3	39
A5	25-7	Sialidase F1/R1 +probe	UNKNOWN	Undetermined			#VALUE!	#VALUE!	#VALUE!	3	39
B5	25-7	Sialidase F1/R1 +probe	UNKNOWN	Undetermined			#VALUE!			3	39
C5	27-1	Sialidase F1/R1 +probe	UNKNOWN	Undetermined			#VALUE!	#VALUE!	#VALUE!	3	39
D5	27-1	Sialidase F1/R1 +probe	UNKNOWN	Undetermined			#VALUE!			3	39
E5	27-5	Sialidase F1/R1 +probe	UNKNOWN	34.5401	35.4795	1.32848	18.2899	12.0802	8.78186	3	31
F5	27-5	Sialidase F1/R1 +probe	UNKNOWN	36.4189	35.4795	1.32848	5.87048			3	33
G5	27-7	Sialidase F1/R1 +probe	UNKNOWN	Undetermined			#VALUE!	#VALUE!	#VALUE!	3	39
H5	27-7	Sialidase F1/R1 +probe	UNKNOWN	Undetermined			#VALUE!			3	39
I5	32-2	Sialidase F1/R1 +probe	UNKNOWN	Undetermined			#VALUE!	#VALUE!	#VALUE!	3	39
J5	32-2	Sialidase F1/R1 +probe	UNKNOWN	Undetermined			#VALUE!			3	21
K5	32-5	Sialidase F1/R1 +probe	UNKNOWN	Undetermined	37.0809		#VALUE!	#VALUE!	#VALUE!	3	39
L5	32-5	Sialidase F1/R1 +probe	UNKNOWN	37.0809	37.0809		3.93331			3	34
M5	32-7	Sialidase F1/R1 +probe	UNKNOWN	Undetermined			#VALUE!	#VALUE!	#VALUE!	3	39
N5	32-7	Sialidase F1/R1 +probe	UNKNOWN	Undetermined			#VALUE!			3	39
O5	40-1	Sialidase F1/R1 +probe	UNKNOWN	Undetermined			#VALUE!	#VALUE!	#VALUE!	3	39
P5	40-1	Sialidase F1/R1 +probe	UNKNOWN	Undetermined			#VALUE!			3	39
A6	40-5	Sialidase F1/R1 +probe	UNKNOWN	Undetermined			#VALUE!	#VALUE!	#VALUE!	3	39
B6	40-5	Sialidase F1/R1 +probe	UNKNOWN	Undetermined			#VALUE!			3	39
C6	40-7	Sialidase F1/R1 +probe	UNKNOWN	35.3944	35.3944		10.9095	#VALUE!	#VALUE!	3	32
D6	40-7	Sialidase F1/R1 +probe	UNKNOWN	Undetermined	35.3944		#VALUE!			3	39
E6	43-1	Sialidase F1/R1 +probe	UNKNOWN	35.5092	35.5092		10.1774	#VALUE!	#VALUE!	3	32
F6	43-1	Sialidase F1/R1 +probe	UNKNOWN	Undetermined	35.5092		#VALUE!			3	39
G6	43-5	Sialidase F1/R1 +probe	UNKNOWN	Undetermined			#VALUE!	#VALUE!	#VALUE!	3	39
H6	43-5	Sialidase F1/R1 +probe	UNKNOWN	Undetermined			#VALUE!			3	39
I6	43-7	Sialidase F1/R1 +probe	UNKNOWN	Undetermined	35.7318		#VALUE!	#VALUE!	#VALUE!	3	39
J6	43-7	Sialidase F1/R1 +probe	UNKNOWN	35.7318	35.7318		8.89541			3	33
K6	55-1	Sialidase F1/R1 +probe	UNKNOWN	Undetermined	36.3112		#VALUE!	#VALUE!	#VALUE!	3	39
L6	55-1	Sialidase F1/R1 +probe	UNKNOWN	36.3112	36.3112		6.26577			3	33
M6	55-5	Sialidase F1/R1 +probe	UNKNOWN	Undetermined			#VALUE!	#VALUE!	#VALUE!	3	39
N6	55-5	Sialidase F1/R1 +probe	UNKNOWN	Undetermined			#VALUE!			3	39
O6	55-7	Sialidase F1/R1 +probe	UNKNOWN	Undetermined			#VALUE!	#VALUE!	#VALUE!	3	39
P6	55-7	Sialidase F1/R1 +probe	UNKNOWN	Undetermined			#VALUE!			3	39
A7	59-1	Sialidase F1/R1 +probe	UNKNOWN	Undetermined			#VALUE!	#VALUE!	#VALUE!	3	39
B7	59-1	Sialidase F1/R1 +probe	UNKNOWN	Undetermined			#VALUE!			3	39
C7	59-5	Sialidase F1/R1 +probe	UNKNOWN	Undetermined			#VALUE!	#VALUE!	#VALUE!	3	39
D7	59-5	Sialidase F1/R1 +probe	UNKNOWN	Undetermined			#VALUE!			3	39
E7	59-7	Sialidase F1/R1 +probe	UNKNOWN	Undetermined			#VALUE!	#VALUE!	#VALUE!	3	39
F7	59-7	Sialidase F1/R1 +probe	UNKNOWN	Undetermined			#VALUE!			3	39
G7	70-1	Sialidase F1/R1 +probe	UNKNOWN	Undetermined			#VALUE!	#VALUE!	#VALUE!	3	39
H7	70-1	Sialidase F1/R1 +probe	UNKNOWN	Undetermined			#VALUE!			3	4
I7	70-5	Sialidase F1/R1 +probe	UNKNOWN	Undetermined			#VALUE!	#VALUE!	#VALUE!	3	39
J7	70-5	Sialidase F1/R1 +probe	UNKNOWN	Undetermined			#VALUE!			3	39
K7	70-7	Sialidase F1/R1 +probe	UNKNOWN	Undetermined			#VALUE!	#VALUE!	#VALUE!	3	39
L7	70-7	Sialidase F1/R1 +probe	UNKNOWN	Undetermined			#VALUE!			3	39
M7	73-1	Sialidase F1/R1 +probe	UNKNOWN	31.0607	32.8544	2.53664	150.048	83.591	93.9846	3	28
N7	73-1	Sialidase F1/R1 +probe	UNKNOWN	34.6481	32.8544	2.53664	17.1338			3	31
O7	73-5	Sialidase F1/R1 +probe	UNKNOWN	Undetermined			#VALUE!	#VALUE!	#VALUE!	3	39
P7	73-5	Sialidase F1/R1 +probe	UNKNOWN	Undetermined			#VALUE!			3	39
A8	73-7	Sialidase F1/R1 +probe	UNKNOWN	Undetermined			#VALUE!	#VALUE!	#VALUE!	3	39
B8	73-7	Sialidase F1/R1 +probe	UNKNOWN	Undetermined			#VALUE!			3	39
C8	74-2	Sialidase F1/R1 +probe	UNKNOWN	Undetermined	36.4877		#VALUE!	#VALUE!	#VALUE!	3	39
D8	74-2	Sialidase F1/R1 +probe	UNKNOWN	36.4877	36.4877		5.63109			3	33
E8	74-5	Sialidase F1/R1 +probe	UNKNOWN	Undetermined			#VALUE!	#VALUE!	#VALUE!	3	39
F8	74-5	Sialidase F1/R1 +probe	UNKNOWN	Undetermined			#VALUE!			3	39
G8	74-7	Sialidase F1/R1 +probe	UNKNOWN	Undetermined			#VALUE!	#VALUE!	#VALUE!	3	39
H8	74-7	Sialidase F1/R1 +probe	UNKNOWN	Undetermined			#VALUE!			3	39
I8	87-1	Sialidase F1/R1 +probe	UNKNOWN	Undetermined	35.4962		#VALUE!	#VALUE!	#VALUE!	3	39
J8	87-1	Sialidase F1/R1 +probe	UNKNOWN	35.4962	35.4962		10.2581			3	32
K8	87-5	Sialidase F1/R1 +probe	UNKNOWN	21.9144	21.9376	0.0328192	37924.6	37399.7	742.404	3	19
L8	87-5	Sialidase F1/R1 +probe	UNKNOWN	21.9608	21.9376	0.0328192	36874.7			3	19
M8	87-7	Sialidase F1/R1 +probe	UNKNOWN	21.7911	21.833	0.0593333	40862.7	39851.6	1429.94	3	19
N8	87-7	Sialidase F1/R1 +probe	UNKNOWN	21.875	21.833	0.0593333	38840.5			3	19
O8	92-1	Sialidase F1/R1 +probe	UNKNOWN	32.3072	32.365	0.0817689	70.5995	68.2147	3.37254	3	29
P8	92-1	Sialidase F1/R1 +probe	UNKNOWN	32.4228	32.365	0.0817689	65.83			3	29
A9	92-5	Sialidase F1/R1 +probe	UNKNOWN	Undetermined			#VALUE!	#VALUE!	#VALUE!	3	39
B9	92-5	Sialidase F1/R1 +probe	UNKNOWN	Undetermined			#VALUE!			3	39
C9	92-7	Sialidase F1/R1 +probe	UNKNOWN	36.3124	36.1563	0.220814	6.26102	6.91187	0.920451	3	33
D9	92-7	Sialidase F1/R1 +probe	UNKNOWN	36.0001	36.1563	0.220814	7.56273			3	33
E9	100-1	Sialidase F1/R1 +probe	UNKNOWN	Undetermined			#VALUE!	#VALUE!	#VALUE!	3	39
F9	100-1	Sialidase F1/R1 +probe	UNKNOWN	Undetermined			#VALUE!			3	39
G9	100-5	Sialidase F1/R1 +probe	UNKNOWN	Undetermined			#VALUE!	#VALUE!	#VALUE!	3	39
H9	100-5	Sialidase F1/R1 +probe	UNKNOWN	Undetermined			#VALUE!			3	39
I9	100-7	Sialidase F1/R1 +probe	UNKNOWN	Undetermined			#VALUE!	#VALUE!	#VALUE!	3	39
J9	100-7	Sialidase F1/R1 +probe	UNKNOWN	Undetermined			#VALUE!			3	39
K9	103-1	Sialidase F1/R1 +probe	UNKNOWN	Undetermined			#VALUE!	#VALUE!	#VALUE!	3	39
L9	103-1	Sialidase F1/R1 +probe	UNKNOWN	Undetermined			#VALUE!			3	39
M9	103-5	Sialidase F1/R1 +probe	UNKNOWN	Undetermined			#VALUE!	#VALUE!	#VALUE!	3	39
N9	103-5	Sialidase F1/R1 +probe	UNKNOWN	Undetermined			#VALUE!			3	39
O9	103-7	Sialidase F1/R1 +probe	UNKNOWN	Undetermined			#VALUE!	#VALUE!	#VALUE!	3	39
P9	103-7	Sialidase F1/R1 +probe	UNKNOWN	Undetermined			#VALUE!			3	23
A10	104-7	Sialidase F1/R1 +probe	UNKNOWN	36.398	36.398		5.94497	#VALUE!	#VALUE!	3	33
B10	104-7	Sialidase F1/R1 +probe	UNKNOWN	Undetermined	36.398		#VALUE!			3	39
C10	111-1	Sialidase F1/R1 +probe	UNKNOWN	36.547	36.547		5.43286	#VALUE!	#VALUE!	3	33
D10	111-1	Sialidase F1/R1 +probe	UNKNOWN	Undetermined	36.547		#VALUE!			3	39
E10	111-5	Sialidase F1/R1 +probe	UNKNOWN	Undetermined			#VALUE!	#VALUE!	#VALUE!	3	39
F10	111-5	Sialidase F1/R1 +probe	UNKNOWN	Undetermined			#VALUE!			3	39
G10	111-7	Sialidase F1/R1 +probe	UNKNOWN	Undetermined			#VALUE!	#VALUE!	#VALUE!	3	39
H10	111-7	Sialidase F1/R1 +probe	UNKNOWN	Undetermined			#VALUE!			3	39
I10	116-1	Sialidase F1/R1 +probe	UNKNOWN	Undetermined			#VALUE!	#VALUE!	#VALUE!	3	39
J10	116-1	Sialidase F1/R1 +probe	UNKNOWN	Undetermined			#VALUE!			3	39
K10	116-5	Sialidase F1/R1 +probe	UNKNOWN	Undetermined			#VALUE!	#VALUE!	#VALUE!	3	39
L10	116-5	Sialidase F1/R1 +probe	UNKNOWN	Undetermined			#VALUE!			3	39
M10	116-7	Sialidase F1/R1 +probe	UNKNOWN	Undetermined			#VALUE!	#VALUE!	#VALUE!	3	39
N10	116-7	Sialidase F1/R1 +probe	UNKNOWN	Undetermined			#VALUE!			3	39
O10	121-2	Sialidase F1/R1 +probe	UNKNOWN	Undetermined			#VALUE!	#VALUE!	#VALUE!	3	39
P10	121-2	Sialidase F1/R1 +probe	UNKNOWN	Undetermined			#VALUE!			3	39
A11	121-5	Sialidase F1/R1 +probe	UNKNOWN	Undetermined			#VALUE!	#VALUE!	#VALUE!	3	39
B11	121-5	Sialidase F1/R1 +probe	UNKNOWN	Undetermined			#VALUE!			3	39
C11	121-7	Sialidase F1/R1 +probe	UNKNOWN	Undetermined			#VALUE!	#VALUE!	#VALUE!	3	39
D11	121-7	Sialidase F1/R1 +probe	UNKNOWN	Undetermined			#VALUE!			3	39
E11	136-1	Sialidase F1/R1 +probe	UNKNOWN	Undetermined			#VALUE!	#VALUE!	#VALUE!	3	39
F11	136-1	Sialidase F1/R1 +probe	UNKNOWN	Undetermined			#VALUE!			3	39
G11	136-5	Sialidase F1/R1 +probe	UNKNOWN	Undetermined			#VALUE!	#VALUE!	#VALUE!	3	39
H11	136-5	Sialidase F1/R1 +probe	UNKNOWN	Undetermined			#VALUE!			3	39
I11	136-7	Sialidase F1/R1 +probe	UNKNOWN	Undetermined			#VALUE!	#VALUE!	#VALUE!	3	39
J11	136-7	Sialidase F1/R1 +probe	UNKNOWN	Undetermined			#VALUE!			3	39
K11	140-1	Sialidase F1/R1 +probe	UNKNOWN	35.4868	35.4868		10.3162	#VALUE!	#VALUE!	3	32
L11	140-1	Sialidase F1/R1 +probe	UNKNOWN	Undetermined	35.4868		#VALUE!			3	39
M11	140-5	Sialidase F1/R1 +probe	UNKNOWN	Undetermined			#VALUE!	#VALUE!	#VALUE!	3	39
N11	140-5	Sialidase F1/R1 +probe	UNKNOWN	Undetermined			#VALUE!			3	39
O11	149-2	Sialidase F1/R1 +probe	UNKNOWN	Undetermined			#VALUE!	#VALUE!	#VALUE!	3	39
P11	149-2	Sialidase F1/R1 +probe	UNKNOWN	Undetermined			#VALUE!			3	39
A12	149-5	Sialidase F1/R1 +probe	UNKNOWN	Undetermined			#VALUE!	#VALUE!	#VALUE!	3	39
B12	149-5	Sialidase F1/R1 +probe	UNKNOWN	Undetermined			#VALUE!			3	39
C12	149-7	Sialidase F1/R1 +probe	UNKNOWN	Undetermined			#VALUE!	#VALUE!	#VALUE!	3	39
D12	149-7	Sialidase F1/R1 +probe	UNKNOWN	Undetermined			#VALUE!			3	39
E12	153-2	Sialidase F1/R1 +probe	UNKNOWN	Undetermined			#VALUE!	#VALUE!	#VALUE!	3	39
F12	153-2	Sialidase F1/R1 +probe	UNKNOWN	Undetermined			#VALUE!			3	39
G12	153-5	Sialidase F1/R1 +probe	UNKNOWN	Undetermined			#VALUE!	#VALUE!	#VALUE!	3	39
H12	153-5	Sialidase F1/R1 +probe	UNKNOWN	Undetermined			#VALUE!			3	39
I12	153-7	Sialidase F1/R1 +probe	UNKNOWN	Undetermined			#VALUE!	#VALUE!	#VALUE!	3	39
J12	153-7	Sialidase F1/R1 +probe	UNKNOWN	Undetermined			#VALUE!			3	39
K12	154-1	Sialidase F1/R1 +probe	UNKNOWN	Undetermined			#VALUE!	#VALUE!	#VALUE!	3	39
L12	154-1	Sialidase F1/R1 +probe	UNKNOWN	Undetermined			#VALUE!			3	39
M12	154-5	Sialidase F1/R1 +probe	UNKNOWN	Undetermined			#VALUE!	#VALUE!	#VALUE!	3	39
N12	154-5	Sialidase F1/R1 +probe	UNKNOWN	Undetermined			#VALUE!			3	39
O12	154-7	Sialidase F1/R1 +probe	UNKNOWN	Undetermined			#VALUE!	#VALUE!	#VALUE!	3	39
P12	154-7	Sialidase F1/R1 +probe	UNKNOWN	Undetermined			#VALUE!			3	39
A13	157-1	Sialidase F1/R1 +probe	UNKNOWN	Undetermined			#VALUE!	#VALUE!	#VALUE!	3	39
B13	157-1	Sialidase F1/R1 +probe	UNKNOWN	Undetermined			#VALUE!			3	39
C13	157-5	Sialidase F1/R1 +probe	UNKNOWN	Undetermined			#VALUE!	#VALUE!	#VALUE!	3	39
D13	157-5	Sialidase F1/R1 +probe	UNKNOWN	Undetermined			#VALUE!			3	39
E13	157-7	Sialidase F1/R1 +probe	UNKNOWN	Undetermined			#VALUE!	#VALUE!	#VALUE!	3	39
F13	157-7	Sialidase F1/R1 +probe	UNKNOWN	Undetermined			#VALUE!			3	39
G13	158-1	Sialidase F1/R1 +probe	UNKNOWN	Undetermined			#VALUE!	#VALUE!	#VALUE!	3	39
H13	158-1	Sialidase F1/R1 +probe	UNKNOWN	Undetermined			#VALUE!			3	39
I13	159-1	Sialidase F1/R1 +probe	UNKNOWN	Undetermined			#VALUE!	#VALUE!	#VALUE!	3	39
J13	159-1	Sialidase F1/R1 +probe	UNKNOWN	Undetermined			#VALUE!			3	39
K13	159-5	Sialidase F1/R1 +probe	UNKNOWN	Undetermined			#VALUE!	#VALUE!	#VALUE!	3	39
L13	159-5	Sialidase F1/R1 +probe	UNKNOWN	Undetermined			#VALUE!			3	39
M13	159-7	Sialidase F1/R1 +probe	UNKNOWN	29.3592	30.1306	1.09085	419.961	292.569	180.159	3	28
N13	159-7	Sialidase F1/R1 +probe	UNKNOWN	30.9019	30.1306	1.09085	165.178			3	28
O13	160-1	Sialidase F1/R1 +probe	UNKNOWN	Undetermined			#VALUE!	#VALUE!	#VALUE!	3	39
P13	160-1	Sialidase F1/R1 +probe	UNKNOWN	Undetermined			#VALUE!			3	39
A14	160-5	Sialidase F1/R1 +probe	UNKNOWN	Undetermined			#VALUE!	#VALUE!	#VALUE!	3	39
B14	160-5	Sialidase F1/R1 +probe	UNKNOWN	Undetermined			#VALUE!			3	39
C14	160-7	Sialidase F1/R1 +probe	UNKNOWN	Undetermined			#VALUE!	#VALUE!	#VALUE!	3	39
D14	160-7	Sialidase F1/R1 +probe	UNKNOWN	Undetermined			#VALUE!			3	39
E14	162-1	Sialidase F1/R1 +probe	UNKNOWN	Undetermined			#VALUE!	#VALUE!	#VALUE!	3	39
F14	162-1	Sialidase F1/R1 +probe	UNKNOWN	Undetermined			#VALUE!			3	39
G14	162-5	Sialidase F1/R1 +probe	UNKNOWN	Undetermined			#VALUE!	#VALUE!	#VALUE!	3	39
H14	162-5	Sialidase F1/R1 +probe	UNKNOWN	Undetermined			#VALUE!			3	39
I14	162-7	Sialidase F1/R1 +probe	UNKNOWN	Undetermined			#VALUE!	#VALUE!	#VALUE!	3	39
J14	162-7	Sialidase F1/R1 +probe	UNKNOWN	Undetermined			#VALUE!			3	39
K14	165-1	Sialidase F1/R1 +probe	UNKNOWN	Undetermined			#VALUE!	#VALUE!	#VALUE!	3	39
L14	165-1	Sialidase F1/R1 +probe	UNKNOWN	Undetermined			#VALUE!			3	39
M14	165-5	Sialidase F1/R1 +probe	UNKNOWN	Undetermined			#VALUE!	#VALUE!	#VALUE!	3	39
N14	165-5	Sialidase F1/R1 +probe	UNKNOWN	Undetermined			#VALUE!			3	39
O14	165-7	Sialidase F1/R1 +probe	UNKNOWN	Undetermined			#VALUE!	#VALUE!	#VALUE!	3	39
P14	165-7	Sialidase F1/R1 +probe	UNKNOWN	Undetermined			#VALUE!			3	39
A15	166-2	Sialidase F1/R1 +probe	UNKNOWN	Undetermined			#VALUE!	#VALUE!	#VALUE!	3	39
B15	166-2	Sialidase F1/R1 +probe	UNKNOWN	Undetermined			#VALUE!			3	39
C15	166-5	Sialidase F1/R1 +probe	UNKNOWN	Undetermined			#VALUE!	#VALUE!	#VALUE!	3	39
D15	166-5	Sialidase F1/R1 +probe	UNKNOWN	Undetermined			#VALUE!			3	39
E15	166-7	Sialidase F1/R1 +probe	UNKNOWN	Undetermined			#VALUE!	#VALUE!	#VALUE!	3	39
F15	166-7	Sialidase F1/R1 +probe	UNKNOWN	Undetermined			#VALUE!			3	39
G15	169-1	Sialidase F1/R1 +probe	UNKNOWN	Undetermined	35.4711		#VALUE!	#VALUE!	#VALUE!	3	39
H15	169-1	Sialidase F1/R1 +probe	UNKNOWN	35.4711	35.4711		10.4146			3	32
I15	169-5	Sialidase F1/R1 +probe	UNKNOWN	Undetermined			#VALUE!	#VALUE!	#VALUE!	3	39
J15	169-5	Sialidase F1/R1 +probe	UNKNOWN	Undetermined			#VALUE!			3	39
K15	169-7	Sialidase F1/R1 +probe	UNKNOWN	Undetermined			#VALUE!	#VALUE!	#VALUE!	3	39
L15	169-7	Sialidase F1/R1 +probe	UNKNOWN	Undetermined			#VALUE!			3	39
M15	173-1	Sialidase F1/R1 +probe	UNKNOWN	Undetermined			#VALUE!	#VALUE!	#VALUE!	3	39
N15	173-1	Sialidase F1/R1 +probe	UNKNOWN	Undetermined			#VALUE!			3	39
O15	175-2	Sialidase F1/R1 +probe	UNKNOWN	Undetermined			#VALUE!	#VALUE!	#VALUE!	3	39
P15	175-2	Sialidase F1/R1 +probe	UNKNOWN	Undetermined			#VALUE!			3	39
A16	175-5	Sialidase F1/R1 +probe	UNKNOWN	Undetermined			#VALUE!	#VALUE!	#VALUE!	3	39
B16	175-5	Sialidase F1/R1 +probe	UNKNOWN	Undetermined			#VALUE!			3	39
C16	175-7	Sialidase F1/R1 +probe	UNKNOWN	Undetermined			#VALUE!	#VALUE!	#VALUE!	3	39
D16	175-7	Sialidase F1/R1 +probe	UNKNOWN	Undetermined			#VALUE!			3	39
E16	177-1	Sialidase F1/R1 +probe	UNKNOWN	27.8698	27.9779	0.152891	1033.91	970.535	89.6278	3	25
F16	177-1	Sialidase F1/R1 +probe	UNKNOWN	28.086	27.9779	0.152891	907.159			3	25
G16	181-1	Sialidase F1/R1 +probe	UNKNOWN	Undetermined			#VALUE!	#VALUE!	#VALUE!	3	39
H16	181-1	Sialidase F1/R1 +probe	UNKNOWN	Undetermined			#VALUE!			3	39
I16	181-5	Sialidase F1/R1 +probe	UNKNOWN	Undetermined			#VALUE!	#VALUE!	#VALUE!	3	39
J16	181-5	Sialidase F1/R1 +probe	UNKNOWN	Undetermined			#VALUE!			3	39
K16	181-7	Sialidase F1/R1 +probe	UNKNOWN	35.5364	35.4394	0.137141	10.0117	10.6348	0.881187	3	32
L16	181-7	Sialidase F1/R1 +probe	UNKNOWN	35.3424	35.4394	0.137141	11.2579			3	32
A23	AB78	Sialidase F1/R1 +probe	UNKNOWN	Undetermined			#VALUE!	#VALUE!	#VALUE!	3	39
B23	AB78	Sialidase F1/R1 +probe	UNKNOWN	Undetermined			#VALUE!			3	39
C23	AB79	Sialidase F1/R1 +probe	UNKNOWN	Undetermined			#VALUE!	#VALUE!	#VALUE!	3	39
D23	AB79	Sialidase F1/R1 +probe	UNKNOWN	Undetermined			#VALUE!			3	39
E23	AB80	Sialidase F1/R1 +probe	UNKNOWN	Undetermined			#VALUE!	#VALUE!	#VALUE!	3	39
F23	AB80	Sialidase F1/R1 +probe	UNKNOWN	Undetermined			#VALUE!			3	39
G23	AB81	Sialidase F1/R1 +probe	UNKNOWN	Undetermined			#VALUE!	#VALUE!	#VALUE!	3	39
H23	AB81	Sialidase F1/R1 +probe	UNKNOWN	Undetermined			#VALUE!			3	39
I23	AB82	Sialidase F1/R1 +probe	UNKNOWN	Undetermined			#VALUE!	#VALUE!	#VALUE!	3	39
J23	AB82	Sialidase F1/R1 +probe	UNKNOWN	Undetermined			#VALUE!			3	39
K23	AB83	Sialidase F1/R1 +probe	UNKNOWN	Undetermined			#VALUE!	#VALUE!	#VALUE!	3	39
L23	AB83	Sialidase F1/R1 +probe	UNKNOWN	Undetermined			#VALUE!			3	39
M23	AB84	Sialidase F1/R1 +probe	UNKNOWN	Undetermined			#VALUE!	#VALUE!	#VALUE!	3	39
N23	AB84	Sialidase F1/R1 +probe	UNKNOWN	Undetermined			#VALUE!			3	39
O23	AB85	Sialidase F1/R1 +probe	UNKNOWN	Undetermined			#VALUE!	#VALUE!	#VALUE!	3	39
P23	AB85	Sialidase F1/R1 +probe	UNKNOWN	Undetermined			#VALUE!			3	39
G22	AB86	Sialidase F1/R1 +probe	UNKNOWN	Undetermined			#VALUE!	#VALUE!	#VALUE!	3	39
H22	AB86	Sialidase F1/R1 +probe	UNKNOWN	Undetermined			#VALUE!			3	39
I22	AB87	Sialidase F1/R1 +probe	UNKNOWN	Undetermined			#VALUE!	#VALUE!	#VALUE!	3	39
J22	AB87	Sialidase F1/R1 +probe	UNKNOWN	Undetermined			#VALUE!			3	39
K22	AB88	Sialidase F1/R1 +probe	UNKNOWN	Undetermined			#VALUE!	#VALUE!	#VALUE!	3	39
L22	AB88	Sialidase F1/R1 +probe	UNKNOWN	Undetermined			#VALUE!			3	39
M22	AB89	Sialidase F1/R1 +probe	UNKNOWN	Undetermined			#VALUE!	#VALUE!	#VALUE!	3	39
N22	AB89	Sialidase F1/R1 +probe	UNKNOWN	Undetermined			#VALUE!			3	39
O22	AB90	Sialidase F1/R1 +probe	UNKNOWN	Undetermined			#VALUE!	#VALUE!	#VALUE!	3	39
P22	AB90	Sialidase F1/R1 +probe	UNKNOWN	Undetermined			#VALUE!			3	39
A24	Inf sialidase 2348-1	Sialidase F1/R1 +probe	STANDARD	13.2737	13.2668	0.00967017	7.06e+06	7.08932e+06	41468	3	10
B24	Inf sialidase 2348-1	Sialidase F1/R1 +probe	STANDARD	13.26	13.2668	0.00967017	7.11864e+06			3	10
C24	Inf sialidase 2348-2	Sialidase F1/R1 +probe	STANDARD	18.9017	18.7597	0.200739	234612	256588	31079.1	3	16
D24	Inf sialidase 2348-2	Sialidase F1/R1 +probe	STANDARD	18.6178	18.7597	0.200739	278564			3	15
E24	Inf sialidase 2348-3	Sialidase F1/R1 +probe	STANDARD	22.069	21.975	0.133005	34538.6	36619.6	2942.92	3	19
F24	Inf sialidase 2348-3	Sialidase F1/R1 +probe	STANDARD	21.8809	21.975	0.133005	38700.5			3	19
G24	Inf sialidase 2348-4	Sialidase F1/R1 +probe	STANDARD	25.9376	25.9995	0.0876506	3327.09	3206.92	169.945	3	23
H24	Inf sialidase 2348-4	Sialidase F1/R1 +probe	STANDARD	26.0615	25.9995	0.0876506	3086.76			3	23
I24	Inf sialidase 2348-5	Sialidase F1/R1 +probe	STANDARD	31.9168	31.637	0.395636	89.4036	107.407	25.4612	3	29
J24	Inf sialidase 2348-5	Sialidase F1/R1 +probe	STANDARD	31.3573	31.637	0.395636	125.411			3	29
K24	Inf sialidase 2348-6	Sialidase F1/R1 +probe	STANDARD	34.5526	34.0295	0.739716	18.1529	26.1658	11.332	3	32
L24	Inf sialidase 2348-6	Sialidase F1/R1 +probe	STANDARD	33.5065	34.0295	0.739716	34.1788			3	30
M24	NTC	Sialidase F1/R1 +probe	NTC	Undetermined			#VALUE!	#VALUE!	#VALUE!	3	39
N24	NTC	Sialidase F1/R1 +probe	NTC	Undetermined			#VALUE!			3	39
O24	NTC	Sialidase F1/R1 +probe	NTC	Undetermined			#VALUE!	#VALUE!	#VALUE!	3	39
P24	NTC	Sialidase F1/R1 +probe	NTC	Undetermined			#VALUE!			3	39
M16	TH01-1	Sialidase F1/R1 +probe	UNKNOWN	Undetermined			#VALUE!	#VALUE!	#VALUE!	3	39
N16	TH01-1	Sialidase F1/R1 +probe	UNKNOWN	Undetermined			#VALUE!			3	39
O16	TH01-5	Sialidase F1/R1 +probe	UNKNOWN	Undetermined			#VALUE!	#VALUE!	#VALUE!	3	39
P16	TH01-5	Sialidase F1/R1 +probe	UNKNOWN	Undetermined			#VALUE!			3	39
A17	TH01-7	Sialidase F1/R1 +probe	UNKNOWN	Undetermined			#VALUE!	#VALUE!	#VALUE!	3	39
B17	TH01-7	Sialidase F1/R1 +probe	UNKNOWN	Undetermined			#VALUE!			3	39
C17	TH03-1	Sialidase F1/R1 +probe	UNKNOWN	Undetermined			#VALUE!	#VALUE!	#VALUE!	3	39
D17	TH03-1	Sialidase F1/R1 +probe	UNKNOWN	Undetermined			#VALUE!			3	39
E17	TH03-5	Sialidase F1/R1 +probe	UNKNOWN	Undetermined			#VALUE!	#VALUE!	#VALUE!	3	39
F17	TH03-5	Sialidase F1/R1 +probe	UNKNOWN	Undetermined			#VALUE!			3	39
G17	TH03-7	Sialidase F1/R1 +probe	UNKNOWN	35.9053	35.4539	0.638358	8.00931	10.9185	4.11421	3	33
H17	TH03-7	Sialidase F1/R1 +probe	UNKNOWN	35.0025	35.4539	0.638358	13.8277			3	32
I17	TH04-1	Sialidase F1/R1 +probe	UNKNOWN	Undetermined			#VALUE!	#VALUE!	#VALUE!	3	39
J17	TH04-1	Sialidase F1/R1 +probe	UNKNOWN	Undetermined			#VALUE!			3	39
K17	TH04-5	Sialidase F1/R1 +probe	UNKNOWN	34.187	34.5324	0.488515	22.6454	18.778	5.46937	3	31
L17	TH04-5	Sialidase F1/R1 +probe	UNKNOWN	34.8779	34.5324	0.488515	14.9106			3	32
M17	TH04-7	Sialidase F1/R1 +probe	UNKNOWN	Undetermined			#VALUE!	#VALUE!	#VALUE!	3	39
N17	TH04-7	Sialidase F1/R1 +probe	UNKNOWN	Undetermined			#VALUE!			3	39
O17	TH07-1	Sialidase F1/R1 +probe	UNKNOWN	Undetermined			#VALUE!	#VALUE!	#VALUE!	3	39
P17	TH07-1	Sialidase F1/R1 +probe	UNKNOWN	Undetermined			#VALUE!			3	39
A18	TH07-5	Sialidase F1/R1 +probe	UNKNOWN	Undetermined			#VALUE!	#VALUE!	#VALUE!	3	39
B18	TH07-5	Sialidase F1/R1 +probe	UNKNOWN	Undetermined			#VALUE!			3	39
C18	TH07-7	Sialidase F1/R1 +probe	UNKNOWN	Undetermined			#VALUE!	#VALUE!	#VALUE!	3	39
D18	TH07-7	Sialidase F1/R1 +probe	UNKNOWN	Undetermined			#VALUE!			3	39
E18	TH10-1	Sialidase F1/R1 +probe	UNKNOWN	Undetermined			#VALUE!	#VALUE!	#VALUE!	3	39
F18	TH10-1	Sialidase F1/R1 +probe	UNKNOWN	Undetermined			#VALUE!			3	39
G18	TH10-5	Sialidase F1/R1 +probe	UNKNOWN	Undetermined			#VALUE!	#VALUE!	#VALUE!	3	39
H18	TH10-5	Sialidase F1/R1 +probe	UNKNOWN	Undetermined			#VALUE!			3	39
I18	TH10-7	Sialidase F1/R1 +probe	UNKNOWN	Undetermined			#VALUE!	#VALUE!	#VALUE!	3	39
J18	TH10-7	Sialidase F1/R1 +probe	UNKNOWN	Undetermined			#VALUE!			3	39
K18	TH17-1	Sialidase F1/R1 +probe	UNKNOWN	Undetermined			#VALUE!	#VALUE!	#VALUE!	3	39
L18	TH17-1	Sialidase F1/R1 +probe	UNKNOWN	Undetermined			#VALUE!			3	39
M18	TH17-5	Sialidase F1/R1 +probe	UNKNOWN	Undetermined			#VALUE!	#VALUE!	#VALUE!	3	39
N18	TH17-5	Sialidase F1/R1 +probe	UNKNOWN	Undetermined			#VALUE!			3	39
O18	TH17-7	Sialidase F1/R1 +probe	UNKNOWN	34.0781	34.0781		24.1867	#VALUE!	#VALUE!	3	31
P18	TH17-7	Sialidase F1/R1 +probe	UNKNOWN	Undetermined	34.0781		#VALUE!			3	39
A19	TH19-1	Sialidase F1/R1 +probe	UNKNOWN	Undetermined			#VALUE!	#VALUE!	#VALUE!	3	39
B19	TH19-1	Sialidase F1/R1 +probe	UNKNOWN	Undetermined			#VALUE!			3	39
C19	TH19-5	Sialidase F1/R1 +probe	UNKNOWN	Undetermined			#VALUE!	#VALUE!	#VALUE!	3	39
D19	TH19-5	Sialidase F1/R1 +probe	UNKNOWN	Undetermined			#VALUE!			3	39
E19	TH19-7	Sialidase F1/R1 +probe	UNKNOWN	Undetermined			#VALUE!	#VALUE!	#VALUE!	3	39
F19	TH19-7	Sialidase F1/R1 +probe	UNKNOWN	Undetermined			#VALUE!			3	39
G19	TH21-1	Sialidase F1/R1 +probe	UNKNOWN	Undetermined			#VALUE!	#VALUE!	#VALUE!	3	39
H19	TH21-1	Sialidase F1/R1 +probe	UNKNOWN	Undetermined			#VALUE!			3	39
I19	TH21-5	Sialidase F1/R1 +probe	UNKNOWN	Undetermined			#VALUE!	#VALUE!	#VALUE!	3	39
J19	TH21-5	Sialidase F1/R1 +probe	UNKNOWN	Undetermined			#VALUE!			3	39
K19	TH21-7	Sialidase F1/R1 +probe	UNKNOWN	34.6461	34.646		17.1549	#VALUE!	#VALUE!	3	32
L19	TH21-7	Sialidase F1/R1 +probe	UNKNOWN	Undetermined	34.646		#VALUE!			3	39
M19	TH22-1	Sialidase F1/R1 +probe	UNKNOWN	Undetermined			#VALUE!	#VALUE!	#VALUE!	3	39
N19	TH22-1	Sialidase F1/R1 +probe	UNKNOWN	Undetermined			#VALUE!			3	39
O19	TH22-5	Sialidase F1/R1 +probe	UNKNOWN	34.7903	34.7912	0.00125699	15.7218	15.7134	0.011963	3	32
P19	TH22-5	Sialidase F1/R1 +probe	UNKNOWN	34.7921	34.7912	0.00125699	15.7049			3	31
A20	TH22-7	Sialidase F1/R1 +probe	UNKNOWN	33.5193	33.5082	0.0156908	33.9142	34.1434	0.324048	3	30
B20	TH22-7	Sialidase F1/R1 +probe	UNKNOWN	33.4971	33.5082	0.0156908	34.3725			3	30
C20	TH24-1	Sialidase F1/R1 +probe	UNKNOWN	Undetermined			#VALUE!	#VALUE!	#VALUE!	3	39
D20	TH24-1	Sialidase F1/R1 +probe	UNKNOWN	Undetermined			#VALUE!			3	39
E20	TH24-5	Sialidase F1/R1 +probe	UNKNOWN	Undetermined			#VALUE!	#VALUE!	#VALUE!	3	39
F20	TH24-5	Sialidase F1/R1 +probe	UNKNOWN	Undetermined			#VALUE!			3	39
G20	TH24-7	Sialidase F1/R1 +probe	UNKNOWN	34.6147	34.4334	0.256482	17.4831	19.6276	3.03287	3	31
H20	TH24-7	Sialidase F1/R1 +probe	UNKNOWN	34.252	34.4334	0.256482	21.7722			3	31
I20	TH27-1	Sialidase F1/R1 +probe	UNKNOWN	Undetermined			#VALUE!	#VALUE!	#VALUE!	3	39
J20	TH27-1	Sialidase F1/R1 +probe	UNKNOWN	Undetermined			#VALUE!			3	39
K20	TH27-5	Sialidase F1/R1 +probe	UNKNOWN	21.3011	21.2619	0.0553843	54959.1	56292.4	1885.47	3	18
L20	TH27-5	Sialidase F1/R1 +probe	UNKNOWN	21.2228	21.2619	0.0553843	57625.6			3	18
M20	TH27-7	Sialidase F1/R1 +probe	UNKNOWN	Undetermined	23.477		#VALUE!	#VALUE!	#VALUE!	3	39
N20	TH27-7	Sialidase F1/R1 +probe	UNKNOWN	23.477	23.477		14738.1			3	20
O20	TH31-1	Sialidase F1/R1 +probe	UNKNOWN	6.8586	6.8586		3.41985e+08	#VALUE!	#VALUE!	3	5
P20	TH31-1	Sialidase F1/R1 +probe	UNKNOWN	Undetermined	6.8586		#VALUE!			3	39
A21	TH31-5	Sialidase F1/R1 +probe	UNKNOWN	Undetermined			#VALUE!	#VALUE!	#VALUE!	3	39
B21	TH31-5	Sialidase F1/R1 +probe	UNKNOWN	Undetermined			#VALUE!			3	39
C21	TH31-7	Sialidase F1/R1 +probe	UNKNOWN	20.6453	21.1606	0.728774	81719.2	62764.9	26805.4	3	18
D21	TH31-7	Sialidase F1/R1 +probe	UNKNOWN	21.6759	21.1606	0.728774	43810.7			3	18
E21	TH32-1	Sialidase F1/R1 +probe	UNKNOWN	Undetermined			#VALUE!	#VALUE!	#VALUE!	3	39
F21	TH32-1	Sialidase F1/R1 +probe	UNKNOWN	Undetermined			#VALUE!			3	39
G21	TH32-5	Sialidase F1/R1 +probe	UNKNOWN	Undetermined			#VALUE!	#VALUE!	#VALUE!	3	39
H21	TH32-5	Sialidase F1/R1 +probe	UNKNOWN	Undetermined			#VALUE!			3	39
I21	TH32-7	Sialidase F1/R1 +probe	UNKNOWN	35.4216	34.9276	0.698583	10.7317	15.1195	6.20528	3	32
J21	TH32-7	Sialidase F1/R1 +probe	UNKNOWN	34.4336	34.9276	0.698583	19.5073			3	31
K21	TH34-1	Sialidase F1/R1 +probe	UNKNOWN	Undetermined			#VALUE!	#VALUE!	#VALUE!	3	39
L21	TH34-1	Sialidase F1/R1 +probe	UNKNOWN	Undetermined			#VALUE!			3	39
M21	TH34-5	Sialidase F1/R1 +probe	UNKNOWN	Undetermined			#VALUE!	#VALUE!	#VALUE!	3	39
N21	TH34-5	Sialidase F1/R1 +probe	UNKNOWN	Undetermined			#VALUE!			3	39
O21	TH34-7	Sialidase F1/R1 +probe	UNKNOWN	36.5534	36.4188	0.190326	5.41183	5.89027	0.676617	3	33
P21	TH34-7	Sialidase F1/R1 +probe	UNKNOWN	36.2842	36.4188	0.190326	6.36871			3	33
A22	TH36-2	Sialidase F1/R1 +probe	UNKNOWN	35.1446	35.1446		12.6891	#VALUE!	#VALUE!	3	32
B22	TH36-2	Sialidase F1/R1 +probe	UNKNOWN	Undetermined	35.1446		#VALUE!			3	39
C22	TH36-5	Sialidase F1/R1 +probe	UNKNOWN	Undetermined	35.5639		#VALUE!	#VALUE!	#VALUE!	3	39
D22	TH36-5	Sialidase F1/R1 +probe	UNKNOWN	35.5639	35.5639		9.84648			3	32
E22	TH36-7	Sialidase F1/R1 +probe	UNKNOWN	36.3678	36.2879	0.112932	6.05485	6.36191	0.434244	3	33
F22	TH36-7	Sialidase F1/R1 +probe	UNKNOWN	36.2081	36.2879	0.112932	6.66896			3	33

## Sheet: Infantis_P2
Block Type	384-Well Block
Calibration Background is expired	Yes
Calibration Background performed on	2015-09-28 10:38:58 AM NZDT
Calibration FAM is expired	Yes
Calibration FAM performed on	2015-09-28 12:44:37 PM NZDT
Calibration NED is expired	Yes
Calibration NED performed on	2015-09-28 12:27:45 PM NZDT
Calibration ROI is expired	Yes
Calibration ROI performed on	2015-09-28 10:31:42 AM NZDT
Calibration ROX is expired	Yes
Calibration ROX performed on	2015-09-28 11:50:26 AM NZDT
Calibration SYBR is expired	Yes
Calibration SYBR performed on	2015-09-28 11:35:56 AM NZDT
Calibration TAMRA is expired	Yes
Calibration TAMRA performed on	2015-09-28 12:05:53 PM NZDT
Calibration Uniformity is expired	Yes
Calibration Uniformity performed on	2015-09-28 11:17:29 AM NZDT
Calibration VIC is expired	Yes
Calibration VIC performed on	2015-09-28 12:36:53 PM NZDT
Chemistry	TAQMAN
Experiment File Name	C:\Users\room811\Desktop\qPCR_longum_infantis\02-Chi formula 384 P2 Taq sialidase.eds
Experiment Name	Chi formula p2 384 taq sialidase
Experiment Run Start Time	2016-07-21 00:10:35 AM NZST
Experiment Run Stop Time	2016-07-21 01:07:01 AM NZST
Experiment Type	Standard Curve
Instrument Name	ViiA7
Instrument Serial Number	278880388
Instrument Type	ViiA(TM) 7 System
Passive Reference	ROX
Quantification Cycle Method	Ct
Signal Smoothing On	true
Stage/ Cycle where Analysis is performed	Stage 2, Step 2
Well Position	Sample Name	Target Name	Task	CT	Ct Mean	Ct SD	Quant by formula	Av. Q/formula	SD Q/formula	Baseline Start	Baseline End
I19	AF001A	Sialidase F1/R1 + probe	UNKNOWN	36.8178	36.8178		4.61188	#VALUE!	#VALUE!	3	33
J19	AF001A	Sialidase F1/R1 + probe	UNKNOWN	Undetermined	36.8178		#VALUE!			3	39
K19	AF001B	Sialidase F1/R1 + probe	UNKNOWN	Undetermined	35.9156		#VALUE!	#VALUE!	#VALUE!	3	39
L19	AF001B	Sialidase F1/R1 + probe	UNKNOWN	35.9156	35.9156		7.95933			3	33
M19	AF001C	Sialidase F1/R1 + probe	UNKNOWN	39.8542	39.8542		0.734917	#VALUE!	#VALUE!	3	35
N19	AF001C	Sialidase F1/R1 + probe	UNKNOWN	Undetermined	39.8542		#VALUE!			3	39
O19	AF001D	Sialidase F1/R1 + probe	UNKNOWN	Undetermined			#VALUE!	#VALUE!	#VALUE!	3	39
P19	AF001D	Sialidase F1/R1 + probe	UNKNOWN	Undetermined			#VALUE!			3	39
A20	AF003A	Sialidase F1/R1 + probe	UNKNOWN	Undetermined	36.8986		#VALUE!	#VALUE!	#VALUE!	3	39
B20	AF003A	Sialidase F1/R1 + probe	UNKNOWN	36.8986	36.8986		4.39185			3	34
C20	AF003B	Sialidase F1/R1 + probe	UNKNOWN	35.8245	36.3547	0.749904	8.41049	6.41935	2.81591	3	33
D20	AF003B	Sialidase F1/R1 + probe	UNKNOWN	36.885	36.3547	0.749904	4.4282			3	34
E20	AF003C	Sialidase F1/R1 + probe	UNKNOWN	34.361	34.361		20.3837	#VALUE!	#VALUE!	3	31
F20	AF003C	Sialidase F1/R1 + probe	UNKNOWN	Undetermined	34.361		#VALUE!			3	39
G20	AF003D	Sialidase F1/R1 + probe	UNKNOWN	34.6293	35.3943	1.08192	17.3296	12.0989	7.39728	3	29
H20	AF003D	Sialidase F1/R1 + probe	UNKNOWN	36.1594	35.3943	1.08192	6.86827			3	28
A1	AF004A	Sialidase F1/R1 + probe	UNKNOWN	Undetermined			#VALUE!	#VALUE!	#VALUE!	3	39
B1	AF004A	Sialidase F1/R1 + probe	UNKNOWN	Undetermined			#VALUE!			3	39
C1	AF004B	Sialidase F1/R1 + probe	UNKNOWN	36.0603	36.1146	0.0766897	7.29223	7.06071	0.327409	3	33
D1	AF004B	Sialidase F1/R1 + probe	UNKNOWN	36.1688	36.1146	0.0766897	6.8292			3	33
E1	AF004C	Sialidase F1/R1 + probe	UNKNOWN	Undetermined	36.4701		#VALUE!	#VALUE!	#VALUE!	3	39
F1	AF004C	Sialidase F1/R1 + probe	UNKNOWN	36.4701	36.4701		5.6914			3	33
G1	AF004D	Sialidase F1/R1 + probe	UNKNOWN	36.0506	36.0506		7.33541	#VALUE!	#VALUE!	3	33
H1	AF004D	Sialidase F1/R1 + probe	UNKNOWN	Undetermined	36.0506		#VALUE!			3	39
I1	AF005A	Sialidase F1/R1 + probe	UNKNOWN	36.7448	35.2927	2.05356	4.82017	16.372	16.3367	3	33
J1	AF005A	Sialidase F1/R1 + probe	UNKNOWN	33.8406	35.2927	2.05356	27.9238			3	31
K1	AF005B	Sialidase F1/R1 + probe	UNKNOWN	Undetermined			#VALUE!	#VALUE!	#VALUE!	3	39
L1	AF005B	Sialidase F1/R1 + probe	UNKNOWN	Undetermined			#VALUE!			3	39
M1	AF005C	Sialidase F1/R1 + probe	UNKNOWN	34.49	34.49		18.8526	#VALUE!	#VALUE!	3	31
N1	AF005C	Sialidase F1/R1 + probe	UNKNOWN	Undetermined	34.49		#VALUE!			3	39
O1	AF005D	Sialidase F1/R1 + probe	UNKNOWN	Undetermined			#VALUE!	#VALUE!	#VALUE!	3	39
P1	AF005D	Sialidase F1/R1 + probe	UNKNOWN	Undetermined			#VALUE!			3	39
A2	AF009A	Sialidase F1/R1 + probe	UNKNOWN	22.7417	22.7483	0.00934514	22993.1	22901.6	129.454	3	19
B2	AF009A	Sialidase F1/R1 + probe	UNKNOWN	22.7549	22.7483	0.00934514	22810			3	19
C2	AF009B	Sialidase F1/R1 + probe	UNKNOWN	25.0945	25.0527	0.0590798	5540.19	5683.79	203.071	3	22
D2	AF009B	Sialidase F1/R1 + probe	UNKNOWN	25.011	25.0527	0.0590798	5827.38			3	22
E2	AF009C	Sialidase F1/R1 + probe	UNKNOWN	22.0603	22.1422	0.115817	34722.3	33084.7	2315.86	3	19
F2	AF009C	Sialidase F1/R1 + probe	UNKNOWN	22.2241	22.1422	0.115817	31447.2			3	19
G2	AF009D	Sialidase F1/R1 + probe	UNKNOWN	20.8199	20.7369	0.11736	73525.4	77407.7	5490.43	3	17
H2	AF009D	Sialidase F1/R1 + probe	UNKNOWN	20.654	20.7369	0.11736	81290			3	17
I20	AF010A	Sialidase F1/R1 + probe	UNKNOWN	Undetermined			#VALUE!	#VALUE!	#VALUE!	3	39
J20	AF010A	Sialidase F1/R1 + probe	UNKNOWN	Undetermined			#VALUE!			3	39
K20	AF010B	Sialidase F1/R1 + probe	UNKNOWN	34.0317	34.0317		24.8758	#VALUE!	#VALUE!	3	31
L20	AF010B	Sialidase F1/R1 + probe	UNKNOWN	Undetermined	34.0317		#VALUE!			3	39
M20	AF010C	Sialidase F1/R1 + probe	UNKNOWN	Undetermined	35.7457		#VALUE!	#VALUE!	#VALUE!	3	39
N20	AF010C	Sialidase F1/R1 + probe	UNKNOWN	35.7457	35.7457		8.8208			3	33
O20	AF010D	Sialidase F1/R1 + probe	UNKNOWN	36.6774	36.9323	0.360532	5.0207	4.3545	0.942157	3	33
P20	AF010D	Sialidase F1/R1 + probe	UNKNOWN	37.1873	36.9323	0.360532	3.68829			3	34
A21	AF011A	Sialidase F1/R1 + probe	UNKNOWN	35.1474	35.1474		12.6674	#VALUE!	#VALUE!	3	32
B21	AF011A	Sialidase F1/R1 + probe	UNKNOWN	Undetermined	35.1474		#VALUE!			3	39
C21	AF011B	Sialidase F1/R1 + probe	UNKNOWN	34.0584	34.9726	1.29287	24.4774	16.2884	11.581	3	31
D21	AF011B	Sialidase F1/R1 + probe	UNKNOWN	35.8868	34.9726	1.29287	8.09943			3	33
E21	AF011C	Sialidase F1/R1 + probe	UNKNOWN	36.7491	36.3277	0.595925	4.80763	6.40595	2.26036	3	33
F21	AF011C	Sialidase F1/R1 + probe	UNKNOWN	35.9063	36.3277	0.595925	8.00427			3	33
G21	AF011D	Sialidase F1/R1 + probe	UNKNOWN	35.617	35.4701	0.207683	9.53523	10.4621	1.31083	3	32
H21	AF011D	Sialidase F1/R1 + probe	UNKNOWN	35.3233	35.4701	0.207683	11.389			3	32
I2	AF012A	Sialidase F1/R1 + probe	UNKNOWN	Undetermined	36.2026		#VALUE!	#VALUE!	#VALUE!	3	35
J2	AF012A	Sialidase F1/R1 + probe	UNKNOWN	36.2026	36.2026		6.69103			3	33
K2	AF012B	Sialidase F1/R1 + probe	UNKNOWN	36.8449	36.8449		4.53702	#VALUE!	#VALUE!	3	34
L2	AF012B	Sialidase F1/R1 + probe	UNKNOWN	Undetermined	36.8449		#VALUE!			3	39
M2	AF012C	Sialidase F1/R1 + probe	UNKNOWN	35.1684	35.1684		12.5076	#VALUE!	#VALUE!	3	32
N2	AF012C	Sialidase F1/R1 + probe	UNKNOWN	Undetermined	35.1684		#VALUE!			3	39
O2	AF012D	Sialidase F1/R1 + probe	UNKNOWN	36.7733	36.7733		4.73781	#VALUE!	#VALUE!	3	34
P2	AF012D	Sialidase F1/R1 + probe	UNKNOWN	Undetermined	36.7733		#VALUE!			3	39
A3	AF014A	Sialidase F1/R1 + probe	UNKNOWN	35.4413	35.2671	0.246343	10.6041	11.8478	1.7589	3	32
B3	AF014A	Sialidase F1/R1 + probe	UNKNOWN	35.093	35.2671	0.246343	13.0915			3	32
C3	AF014B	Sialidase F1/R1 + probe	UNKNOWN	Undetermined			#VALUE!	#VALUE!	#VALUE!	3	39
D3	AF014B	Sialidase F1/R1 + probe	UNKNOWN	Undetermined			#VALUE!			3	39
E3	AF014C	Sialidase F1/R1 + probe	UNKNOWN	Undetermined			#VALUE!	#VALUE!	#VALUE!	3	39
F3	AF014C	Sialidase F1/R1 + probe	UNKNOWN	Undetermined			#VALUE!			3	39
G3	AF014D	Sialidase F1/R1 + probe	UNKNOWN	Undetermined			#VALUE!	#VALUE!	#VALUE!	3	39
H3	AF014D	Sialidase F1/R1 + probe	UNKNOWN	Undetermined			#VALUE!			3	39
I21	AF016A	Sialidase F1/R1 + probe	UNKNOWN	Undetermined			#VALUE!	#VALUE!	#VALUE!	3	39
J21	AF016A	Sialidase F1/R1 + probe	UNKNOWN	Undetermined			#VALUE!			3	39
K21	AF016B	Sialidase F1/R1 + probe	UNKNOWN	35.5154	35.6334	0.166877	10.1392	9.46479	0.953758	3	32
L21	AF016B	Sialidase F1/R1 + probe	UNKNOWN	35.7514	35.6334	0.166877	8.79038			3	33
M21	AF016C	Sialidase F1/R1 + probe	UNKNOWN	Undetermined	35.935		#VALUE!	#VALUE!	#VALUE!	3	39
N21	AF016C	Sialidase F1/R1 + probe	UNKNOWN	35.935	35.935		7.86659			3	33
O21	AF016D	Sialidase F1/R1 + probe	UNKNOWN	25.877	30.7705	6.92042	3451.24	1730.25	2433.84	3	29
P21	AF016D	Sialidase F1/R1 + probe	UNKNOWN	35.6639	30.7705	6.92042	9.26819			3	32
I3	AF018A	Sialidase F1/R1 + probe	UNKNOWN	Undetermined			#VALUE!	#VALUE!	#VALUE!	3	39
J3	AF018A	Sialidase F1/R1 + probe	UNKNOWN	Undetermined			#VALUE!			3	39
K3	AF018B	Sialidase F1/R1 + probe	UNKNOWN	Undetermined			#VALUE!	#VALUE!	#VALUE!	3	39
L3	AF018B	Sialidase F1/R1 + probe	UNKNOWN	Undetermined			#VALUE!			3	39
M3	AF018C	Sialidase F1/R1 + probe	UNKNOWN	Undetermined	35.9228		#VALUE!	#VALUE!	#VALUE!	3	39
N3	AF018C	Sialidase F1/R1 + probe	UNKNOWN	35.9228	35.9228		7.92495			3	33
O3	AF018D	Sialidase F1/R1 + probe	UNKNOWN	Undetermined			#VALUE!	#VALUE!	#VALUE!	3	39
P3	AF018D	Sialidase F1/R1 + probe	UNKNOWN	Undetermined			#VALUE!			3	39
A4	AF023A	Sialidase F1/R1 + probe	UNKNOWN	Undetermined			#VALUE!	#VALUE!	#VALUE!	3	39
B4	AF023A	Sialidase F1/R1 + probe	UNKNOWN	Undetermined			#VALUE!			3	39
C4	AF023B	Sialidase F1/R1 + probe	UNKNOWN	Undetermined	35.8492		#VALUE!	#VALUE!	#VALUE!	3	39
D4	AF023B	Sialidase F1/R1 + probe	UNKNOWN	35.8492	35.8492		8.28588			3	33
E4	AF023C	Sialidase F1/R1 + probe	UNKNOWN	36.9012	37.131	0.324974	4.38507	3.85295	0.752531	3	34
F4	AF023C	Sialidase F1/R1 + probe	UNKNOWN	37.3608	37.131	0.324974	3.32083			3	34
G4	AF023D	Sialidase F1/R1 + probe	UNKNOWN	Undetermined			#VALUE!	#VALUE!	#VALUE!	3	39
H4	AF023D	Sialidase F1/R1 + probe	UNKNOWN	Undetermined			#VALUE!			3	39
A22	AF024A	Sialidase F1/R1 + probe	UNKNOWN	Undetermined			#VALUE!	#VALUE!	#VALUE!	3	39
B22	AF024A	Sialidase F1/R1 + probe	UNKNOWN	Undetermined			#VALUE!			3	39
C22	AF024B	Sialidase F1/R1 + probe	UNKNOWN	Undetermined			#VALUE!	#VALUE!	#VALUE!	3	39
D22	AF024B	Sialidase F1/R1 + probe	UNKNOWN	Undetermined			#VALUE!			3	39
E22	AF024C	Sialidase F1/R1 + probe	UNKNOWN	30.1284	30.3403	0.299747	263.732	233.907	42.1789	3	27
F22	AF024C	Sialidase F1/R1 + probe	UNKNOWN	30.5523	30.3403	0.299747	204.082			3	27
G22	AF024D	Sialidase F1/R1 + probe	UNKNOWN	34.6669	34.6669		16.94	#VALUE!	#VALUE!	3	32
H22	AF024D	Sialidase F1/R1 + probe	UNKNOWN	Undetermined	34.6669		#VALUE!			3	39
I22	AF025A	Sialidase F1/R1 + probe	UNKNOWN	Undetermined			#VALUE!	#VALUE!	#VALUE!	3	39
J22	AF025A	Sialidase F1/R1 + probe	UNKNOWN	Undetermined			#VALUE!			3	39
K22	AF025B	Sialidase F1/R1 + probe	UNKNOWN	Undetermined	35.592		#VALUE!	#VALUE!	#VALUE!	3	39
L22	AF025B	Sialidase F1/R1 + probe	UNKNOWN	35.592	35.592		9.68021			3	32
M22	AF025C	Sialidase F1/R1 + probe	UNKNOWN	34.5377	35.1342	0.843638	18.3169	13.6089	6.6581	3	31
N22	AF025C	Sialidase F1/R1 + probe	UNKNOWN	35.7308	35.1342	0.843638	8.9009			3	32
O22	AF025D	Sialidase F1/R1 + probe	UNKNOWN	35.0419	35.6813	0.904273	13.5019	9.86572	5.1424	3	32
P22	AF025D	Sialidase F1/R1 + probe	UNKNOWN	36.3208	35.6813	0.904273	6.2295			3	33
A23	AF026A	Sialidase F1/R1 + probe	UNKNOWN	Undetermined			#VALUE!	#VALUE!	#VALUE!	3	39
B23	AF026A	Sialidase F1/R1 + probe	UNKNOWN	Undetermined			#VALUE!			3	39
C23	AF026B	Sialidase F1/R1 + probe	UNKNOWN	Undetermined			#VALUE!	#VALUE!	#VALUE!	3	39
D23	AF026B	Sialidase F1/R1 + probe	UNKNOWN	Undetermined			#VALUE!			3	39
E23	AF026C	Sialidase F1/R1 + probe	UNKNOWN	Undetermined			#VALUE!	#VALUE!	#VALUE!	3	39
F23	AF026C	Sialidase F1/R1 + probe	UNKNOWN	Undetermined			#VALUE!			3	39
G23	AF026D	Sialidase F1/R1 + probe	UNKNOWN	33.2931	33.6742	0.539002	38.8876	31.7052	10.1575	3	30
H23	AF026D	Sialidase F1/R1 + probe	UNKNOWN	34.0553	33.6742	0.539002	24.5227			3	31
I4	AF029A	Sialidase F1/R1 + probe	UNKNOWN	Undetermined			#VALUE!	#VALUE!	#VALUE!	3	39
J4	AF029A	Sialidase F1/R1 + probe	UNKNOWN	Undetermined			#VALUE!			3	39
K4	AF029B	Sialidase F1/R1 + probe	UNKNOWN	36.0633	36.4442	0.538649	7.27924	5.93548	1.90037	3	33
L4	AF029B	Sialidase F1/R1 + probe	UNKNOWN	36.8251	36.4442	0.538649	4.59172			3	33
M4	AF029C	Sialidase F1/R1 + probe	UNKNOWN	Undetermined	35.2094		#VALUE!	#VALUE!	#VALUE!	3	39
N4	AF029C	Sialidase F1/R1 + probe	UNKNOWN	35.2094	35.2094		12.2012			3	32
O4	AF029D	Sialidase F1/R1 + probe	UNKNOWN	36.3349	35.8849	0.636492	6.17634	8.41124	3.16062	3	33
P4	AF029D	Sialidase F1/R1 + probe	UNKNOWN	35.4348	35.8849	0.636492	10.6461			3	32
A5	AF030A	Sialidase F1/R1 + probe	UNKNOWN	Undetermined			#VALUE!	#VALUE!	#VALUE!	3	39
B5	AF030A	Sialidase F1/R1 + probe	UNKNOWN	Undetermined			#VALUE!			3	39
C5	AF030B	Sialidase F1/R1 + probe	UNKNOWN	Undetermined			#VALUE!	#VALUE!	#VALUE!	3	39
D5	AF030B	Sialidase F1/R1 + probe	UNKNOWN	Undetermined			#VALUE!			3	39
E5	AF030C	Sialidase F1/R1 + probe	UNKNOWN	34.1809	34.1731	0.0110728	22.7289	22.8371	0.152951	3	31
F5	AF030C	Sialidase F1/R1 + probe	UNKNOWN	34.1653	34.1731	0.0110728	22.9452			3	31
G5	AF030D	Sialidase F1/R1 + probe	UNKNOWN	Undetermined	34.4702		#VALUE!	#VALUE!	#VALUE!	3	39
H5	AF030D	Sialidase F1/R1 + probe	UNKNOWN	34.4702	34.4702		19.0804			3	31
I5	AF033A	Sialidase F1/R1 + probe	UNKNOWN	36.722	36.722		4.88697	#VALUE!	#VALUE!	3	33
J5	AF033A	Sialidase F1/R1 + probe	UNKNOWN	Undetermined	36.722		#VALUE!			3	39
K5	AF033B	Sialidase F1/R1 + probe	UNKNOWN	36.1425	35.3034	1.18667	6.9387	13.0436	8.63356	3	33
L5	AF033B	Sialidase F1/R1 + probe	UNKNOWN	34.4643	35.3034	1.18667	19.1484			3	31
M5	AF033C	Sialidase F1/R1 + probe	UNKNOWN	Undetermined			#VALUE!	#VALUE!	#VALUE!	3	39
N5	AF033C	Sialidase F1/R1 + probe	UNKNOWN	Undetermined			#VALUE!			3	39
O5	AF033D	Sialidase F1/R1 + probe	UNKNOWN	27.4742	27.3585	0.163711	1313.39	1412.1	139.604	3	24
P5	AF033D	Sialidase F1/R1 + probe	UNKNOWN	27.2427	27.3585	0.163711	1510.82			3	24
I23	AF035A	Sialidase F1/R1 + probe	UNKNOWN	16.5613	16.7825	0.312712	966383	852972	160386	3	13
J23	AF035A	Sialidase F1/R1 + probe	UNKNOWN	17.0036	16.7825	0.312712	739562			3	14
K23	AF035B	Sialidase F1/R1 + probe	UNKNOWN	36.8434	27.1203	13.7505	4.54118	291425	412130	3	33
L23	AF035B	Sialidase F1/R1 + probe	UNKNOWN	17.3973	27.1203	13.7505	582845			3	14
M23	AF035C	Sialidase F1/R1 + probe	UNKNOWN	17.9089	17.9089		427707	#VALUE!	#VALUE!	3	15
N23	AF035C	Sialidase F1/R1 + probe	UNKNOWN	Undetermined	17.9089		#VALUE!			3	21
O23	AF035D	Sialidase F1/R1 + probe	UNKNOWN	18.5782	18.5782		285319	#VALUE!	#VALUE!	3	15
P23	AF035D	Sialidase F1/R1 + probe	UNKNOWN	Undetermined	18.5782		#VALUE!			3	39
A6	AF038A	Sialidase F1/R1 + probe	UNKNOWN	34.0268	33.6409	0.545805	24.9491	32.3719	10.4974	3	31
B6	AF038A	Sialidase F1/R1 + probe	UNKNOWN	33.2549	33.6409	0.545805	39.7947			3	30
C6	AF038B	Sialidase F1/R1 + probe	UNKNOWN	Undetermined	35.3733		#VALUE!	#VALUE!	#VALUE!	3	39
D6	AF038B	Sialidase F1/R1 + probe	UNKNOWN	35.3733	35.3733		11.0497			3	32
E6	AF038C	Sialidase F1/R1 + probe	UNKNOWN	37.5289	35.83	2.40255	2.99971	13.2114	14.4415	3	34
F6	AF038C	Sialidase F1/R1 + probe	UNKNOWN	34.1312	35.83	2.40255	23.423			3	31
G6	AF038D	Sialidase F1/R1 + probe	UNKNOWN	Undetermined			#VALUE!	#VALUE!	#VALUE!	3	39
H6	AF038D	Sialidase F1/R1 + probe	UNKNOWN	Undetermined			#VALUE!			3	39
I6	AF044A	Sialidase F1/R1 + probe	UNKNOWN	36.2496	37.7583	2.13357	6.50341	3.77588	3.85731	3	33
J6	AF044A	Sialidase F1/R1 + probe	UNKNOWN	39.2669	37.7583	2.13357	1.04835			3	35
K6	AF044B	Sialidase F1/R1 + probe	UNKNOWN	34.0605	34.9762	1.29493	24.4454	16.26	11.5759	3	31
L6	AF044B	Sialidase F1/R1 + probe	UNKNOWN	35.8919	34.9762	1.29493	8.07461			3	33
M6	AF044C	Sialidase F1/R1 + probe	UNKNOWN	35.554	35.554		9.9053	#VALUE!	#VALUE!	3	32
N6	AF044C	Sialidase F1/R1 + probe	UNKNOWN	Undetermined	35.554		#VALUE!			3	39
O6	AF044D	Sialidase F1/R1 + probe	UNKNOWN	34.0846	35.5464	2.0674	24.093	14.1015	14.1302	3	31
P6	AF044D	Sialidase F1/R1 + probe	UNKNOWN	37.0083	35.5464	2.0674	4.10998			3	34
A7	AF046A	Sialidase F1/R1 + probe	UNKNOWN	Undetermined			#VALUE!	#VALUE!	#VALUE!	3	39
B7	AF046A	Sialidase F1/R1 + probe	UNKNOWN	Undetermined			#VALUE!			3	39
C7	AF046B	Sialidase F1/R1 + probe	UNKNOWN	Undetermined	35.5458		#VALUE!	#VALUE!	#VALUE!	3	39
D7	AF046B	Sialidase F1/R1 + probe	UNKNOWN	35.5458	35.5458		9.95474			3	32
E7	AF046C	Sialidase F1/R1 + probe	UNKNOWN	34.5106	34.8663	0.50307	18.6198	15.364	4.60436	3	31
F7	AF046C	Sialidase F1/R1 + probe	UNKNOWN	35.222	34.8663	0.50307	12.1082			3	32
G7	AF046D	Sialidase F1/R1 + probe	UNKNOWN	Undetermined			#VALUE!	#VALUE!	#VALUE!	3	39
H7	AF046D	Sialidase F1/R1 + probe	UNKNOWN	Undetermined			#VALUE!			3	39
I7	AF047A	Sialidase F1/R1 + probe	UNKNOWN	28.2032	21.7349	9.14755	845.073	1.05782e+06	1.49479e+06	3	25
J7	AF047A	Sialidase F1/R1 + probe	UNKNOWN	15.2666	21.7349	9.14755	2.11479e+06			3	12
K7	AF047B	Sialidase F1/R1 + probe	UNKNOWN	15.8783	15.7149	0.231094	1.46077e+06	1.62042e+06	225772	3	13
L7	AF047B	Sialidase F1/R1 + probe	UNKNOWN	15.5515	15.7149	0.231094	1.78006e+06			3	12
M7	AF047C	Sialidase F1/R1 + probe	UNKNOWN	15.1344	14.8918	0.343116	2.29082e+06	2.68155e+06	552575	3	12
N7	AF047C	Sialidase F1/R1 + probe	UNKNOWN	14.6492	14.8918	0.343116	3.07228e+06			3	12
O7	AF047D	Sialidase F1/R1 + probe	UNKNOWN	32.6421	32.3008	0.482759	57.6518	72.3902	20.8433	3	29
P7	AF047D	Sialidase F1/R1 + probe	UNKNOWN	31.9594	32.3008	0.482759	87.1287			3	29
A8	AF049A	Sialidase F1/R1 + probe	UNKNOWN	Undetermined	34.6234		#VALUE!	#VALUE!	#VALUE!	3	39
B8	AF049A	Sialidase F1/R1 + probe	UNKNOWN	34.6234	34.6234		17.3921			3	31
C8	AF049B	Sialidase F1/R1 + probe	UNKNOWN	36.5655	37.249	0.966675	5.37245	3.86117	2.13728	3	33
D8	AF049B	Sialidase F1/R1 + probe	UNKNOWN	37.9325	37.249	0.966675	2.34988			3	35
E8	AF049C	Sialidase F1/R1 + probe	UNKNOWN	Undetermined	34.4072		#VALUE!	#VALUE!	#VALUE!	3	39
F8	AF049C	Sialidase F1/R1 + probe	UNKNOWN	34.4072	34.4072		19.8213			3	31
G8	AF049D	Sialidase F1/R1 + probe	UNKNOWN	Undetermined			#VALUE!	#VALUE!	#VALUE!	3	39
H8	AF049D	Sialidase F1/R1 + probe	UNKNOWN	Undetermined			#VALUE!			3	39
I8	AF050A	Sialidase F1/R1 + probe	UNKNOWN	Undetermined			#VALUE!	#VALUE!	#VALUE!	3	39
J8	AF050A	Sialidase F1/R1 + probe	UNKNOWN	Undetermined			#VALUE!			3	39
K8	AF050B	Sialidase F1/R1 + probe	UNKNOWN	Undetermined			#VALUE!	#VALUE!	#VALUE!	3	39
L8	AF050B	Sialidase F1/R1 + probe	UNKNOWN	Undetermined			#VALUE!			3	39
M8	AF050C	Sialidase F1/R1 + probe	UNKNOWN	Undetermined			#VALUE!	#VALUE!	#VALUE!	3	39
N8	AF050C	Sialidase F1/R1 + probe	UNKNOWN	Undetermined			#VALUE!			3	39
O8	AF050D	Sialidase F1/R1 + probe	UNKNOWN	Undetermined			#VALUE!	#VALUE!	#VALUE!	3	39
P8	AF050D	Sialidase F1/R1 + probe	UNKNOWN	Undetermined			#VALUE!			3	39
A9	AF053A	Sialidase F1/R1 + probe	UNKNOWN	Undetermined			#VALUE!	#VALUE!	#VALUE!	3	39
B9	AF053A	Sialidase F1/R1 + probe	UNKNOWN	Undetermined			#VALUE!			3	39
C9	AF053B	Sialidase F1/R1 + probe	UNKNOWN	Undetermined			#VALUE!	#VALUE!	#VALUE!	3	39
D9	AF053B	Sialidase F1/R1 + probe	UNKNOWN	Undetermined			#VALUE!			3	39
E9	AF053C	Sialidase F1/R1 + probe	UNKNOWN	19.6007	19.7184	0.166427	153719	143520	14423.5	3	16
F9	AF053C	Sialidase F1/R1 + probe	UNKNOWN	19.836	19.7184	0.166427	133321			3	15
G9	AF053D	Sialidase F1/R1 + probe	UNKNOWN	21.6912	22.0188	0.463375	43408.2	36305.5	10044.7	3	19
H9	AF053D	Sialidase F1/R1 + probe	UNKNOWN	22.3465	22.0188	0.463375	29202.8			3	19
I9	AF055A	Sialidase F1/R1 + probe	UNKNOWN	20.1951	20.2348	0.0561517	107294	104778	3558.09	3	17
J9	AF055A	Sialidase F1/R1 + probe	UNKNOWN	20.2745	20.2348	0.0561517	102262			3	17
K9	AF055B	Sialidase F1/R1 + probe	UNKNOWN	20.6744	20.873	0.280894	80290.8	71716	12126.7	3	17
L9	AF055B	Sialidase F1/R1 + probe	UNKNOWN	21.0717	20.873	0.280894	63141.1			3	18
M9	AF055C	Sialidase F1/R1 + probe	UNKNOWN	30.4966	30.4605	0.0511157	211.065	215.782	6.67059	3	27
N9	AF055C	Sialidase F1/R1 + probe	UNKNOWN	30.4244	30.4605	0.0511157	220.499			3	27
O9	AF055D	Sialidase F1/R1 + probe	UNKNOWN	34.4624	35.4752	1.43226	19.1701	12.4002	9.57409	3	31
P9	AF055D	Sialidase F1/R1 + probe	UNKNOWN	36.488	35.4752	1.43226	5.63025			3	33
A10	AF057A	Sialidase F1/R1 + probe	UNKNOWN	35.2803	35.2803		11.6889	#VALUE!	#VALUE!	3	32
B10	AF057A	Sialidase F1/R1 + probe	UNKNOWN	Undetermined	35.2803		#VALUE!			3	39
C10	AF057B	Sialidase F1/R1 + probe	UNKNOWN	35.0275	36.1563	1.59638	13.6201	8.54817	7.17274	3	32
D10	AF057B	Sialidase F1/R1 + probe	UNKNOWN	37.2851	36.1563	1.59638	3.47628			3	34
E10	AF057C	Sialidase F1/R1 + probe	UNKNOWN	Undetermined	36.9795		#VALUE!	#VALUE!	#VALUE!	3	39
F10	AF057C	Sialidase F1/R1 + probe	UNKNOWN	36.9795	36.9795		4.18218			3	34
G10	AF057D	Sialidase F1/R1 + probe	UNKNOWN	Undetermined	36.9874		#VALUE!	#VALUE!	#VALUE!	3	39
H10	AF057D	Sialidase F1/R1 + probe	UNKNOWN	36.9874	36.9874		4.1622			3	33
I10	AF058A	Sialidase F1/R1 + probe	UNKNOWN	35.6614	35.6614		9.28233	#VALUE!	#VALUE!	3	32
J10	AF058A	Sialidase F1/R1 + probe	UNKNOWN	Undetermined	35.6614		#VALUE!			3	39
K10	AF058B	Sialidase F1/R1 + probe	UNKNOWN	Undetermined			#VALUE!	#VALUE!	#VALUE!	3	39
L10	AF058B	Sialidase F1/R1 + probe	UNKNOWN	Undetermined			#VALUE!			3	39
M10	AF058C	Sialidase F1/R1 + probe	UNKNOWN	Undetermined			#VALUE!	#VALUE!	#VALUE!	3	39
N10	AF058C	Sialidase F1/R1 + probe	UNKNOWN	Undetermined			#VALUE!			3	39
O10	AF058D	Sialidase F1/R1 + probe	UNKNOWN	Undetermined			#VALUE!	#VALUE!	#VALUE!	3	39
P10	AF058D	Sialidase F1/R1 + probe	UNKNOWN	Undetermined			#VALUE!			3	39
A11	AF062A	Sialidase F1/R1 + probe	UNKNOWN	Undetermined			#VALUE!	#VALUE!	#VALUE!	3	39
B11	AF062A	Sialidase F1/R1 + probe	UNKNOWN	Undetermined			#VALUE!			3	39
C11	AF062B	Sialidase F1/R1 + probe	UNKNOWN	Undetermined			#VALUE!	#VALUE!	#VALUE!	3	39
D11	AF062B	Sialidase F1/R1 + probe	UNKNOWN	Undetermined			#VALUE!			3	39
E11	AF062C	Sialidase F1/R1 + probe	UNKNOWN	Undetermined	35.8129		#VALUE!	#VALUE!	#VALUE!	3	39
F11	AF062C	Sialidase F1/R1 + probe	UNKNOWN	35.8129	35.8129		8.46978			3	32
G11	AF062D	Sialidase F1/R1 + probe	UNKNOWN	Undetermined			#VALUE!	#VALUE!	#VALUE!	3	39
H11	AF062D	Sialidase F1/R1 + probe	UNKNOWN	Undetermined			#VALUE!			3	39
I11	AF063A	Sialidase F1/R1 + probe	UNKNOWN	Undetermined			#VALUE!	#VALUE!	#VALUE!	3	39
J11	AF063A	Sialidase F1/R1 + probe	UNKNOWN	Undetermined			#VALUE!			3	39
K11	AF063B	Sialidase F1/R1 + probe	UNKNOWN	Undetermined			#VALUE!	#VALUE!	#VALUE!	3	39
L11	AF063B	Sialidase F1/R1 + probe	UNKNOWN	Undetermined			#VALUE!			3	39
M11	AF063C	Sialidase F1/R1 + probe	UNKNOWN	Undetermined			#VALUE!	#VALUE!	#VALUE!	3	39
N11	AF063C	Sialidase F1/R1 + probe	UNKNOWN	Undetermined			#VALUE!			3	39
O11	AF063D	Sialidase F1/R1 + probe	UNKNOWN	Undetermined			#VALUE!	#VALUE!	#VALUE!	3	39
P11	AF063D	Sialidase F1/R1 + probe	UNKNOWN	Undetermined			#VALUE!			3	39
A12	AF065A	Sialidase F1/R1 + probe	UNKNOWN	Undetermined			#VALUE!	#VALUE!	#VALUE!	3	39
B12	AF065A	Sialidase F1/R1 + probe	UNKNOWN	Undetermined			#VALUE!			3	39
C12	AF065B	Sialidase F1/R1 + probe	UNKNOWN	32.7772	32.5639	0.301647	53.1282	60.9483	11.0593	3	29
D12	AF065B	Sialidase F1/R1 + probe	UNKNOWN	32.3506	32.5639	0.301647	68.7683			3	28
E12	AF065C	Sialidase F1/R1 + probe	UNKNOWN	35.8907	35.8907		8.0804	#VALUE!	#VALUE!	3	33
F12	AF065C	Sialidase F1/R1 + probe	UNKNOWN	Undetermined	35.8907		#VALUE!			3	39
G12	AF065D	Sialidase F1/R1 + probe	UNKNOWN	35.7897	35.7897		8.58916	#VALUE!	#VALUE!	3	32
H12	AF065D	Sialidase F1/R1 + probe	UNKNOWN	Undetermined	35.7897		#VALUE!			3	39
I12	AF067A	Sialidase F1/R1 + probe	UNKNOWN	36.6957	36.6957		4.96536	#VALUE!	#VALUE!	3	33
J12	AF067A	Sialidase F1/R1 + probe	UNKNOWN	Undetermined	36.6957		#VALUE!			3	39
K12	AF067B	Sialidase F1/R1 + probe	UNKNOWN	Undetermined			#VALUE!	#VALUE!	#VALUE!	3	39
L12	AF067B	Sialidase F1/R1 + probe	UNKNOWN	Undetermined			#VALUE!			3	39
M12	AF067C	Sialidase F1/R1 + probe	UNKNOWN	Undetermined			#VALUE!	#VALUE!	#VALUE!	3	39
N12	AF067C	Sialidase F1/R1 + probe	UNKNOWN	Undetermined			#VALUE!			3	39
O12	AF067D	Sialidase F1/R1 + probe	UNKNOWN	Undetermined			#VALUE!	#VALUE!	#VALUE!	3	39
P12	AF067D	Sialidase F1/R1 + probe	UNKNOWN	Undetermined			#VALUE!			3	39
A13	AF068A	Sialidase F1/R1 + probe	UNKNOWN	Undetermined			#VALUE!	#VALUE!	#VALUE!	3	39
B13	AF068A	Sialidase F1/R1 + probe	UNKNOWN	Undetermined			#VALUE!			3	39
C13	AF068B	Sialidase F1/R1 + probe	UNKNOWN	Undetermined			#VALUE!	#VALUE!	#VALUE!	3	39
D13	AF068B	Sialidase F1/R1 + probe	UNKNOWN	Undetermined			#VALUE!			3	39
E13	AF068C	Sialidase F1/R1 + probe	UNKNOWN	Undetermined			#VALUE!	#VALUE!	#VALUE!	3	39
F13	AF068C	Sialidase F1/R1 + probe	UNKNOWN	Undetermined			#VALUE!			3	39
G13	AF068D	Sialidase F1/R1 + probe	UNKNOWN	37.5052	37.5052		3.04294	#VALUE!	#VALUE!	3	34
H13	AF068D	Sialidase F1/R1 + probe	UNKNOWN	Undetermined	37.5052		#VALUE!			3	39
I13	AF070A	Sialidase F1/R1 + probe	UNKNOWN	Undetermined			#VALUE!	#VALUE!	#VALUE!	3	39
J13	AF070A	Sialidase F1/R1 + probe	UNKNOWN	Undetermined			#VALUE!			3	39
K13	AF070B	Sialidase F1/R1 + probe	UNKNOWN	Undetermined			#VALUE!	#VALUE!	#VALUE!	3	39
L13	AF070B	Sialidase F1/R1 + probe	UNKNOWN	Undetermined			#VALUE!			3	39
M13	AF070C	Sialidase F1/R1 + probe	UNKNOWN	Undetermined	35.3521		#VALUE!	#VALUE!	#VALUE!	3	39
N13	AF070C	Sialidase F1/R1 + probe	UNKNOWN	35.3521	35.3521		11.1919			3	32
O13	AF070D	Sialidase F1/R1 + probe	UNKNOWN	Undetermined			#VALUE!	#VALUE!	#VALUE!	3	39
P13	AF070D	Sialidase F1/R1 + probe	UNKNOWN	Undetermined			#VALUE!			3	39
A14	AF075A	Sialidase F1/R1 + probe	UNKNOWN	Undetermined			#VALUE!	#VALUE!	#VALUE!	3	39
B14	AF075A	Sialidase F1/R1 + probe	UNKNOWN	Undetermined			#VALUE!			3	39
C14	AF075B	Sialidase F1/R1 + probe	UNKNOWN	Undetermined			#VALUE!	#VALUE!	#VALUE!	3	39
D14	AF075B	Sialidase F1/R1 + probe	UNKNOWN	Undetermined			#VALUE!			3	39
E14	AF075C	Sialidase F1/R1 + probe	UNKNOWN	Undetermined			#VALUE!	#VALUE!	#VALUE!	3	39
F14	AF075C	Sialidase F1/R1 + probe	UNKNOWN	Undetermined			#VALUE!			3	39
G14	AF075D	Sialidase F1/R1 + probe	UNKNOWN	Undetermined			#VALUE!	#VALUE!	#VALUE!	3	39
H14	AF075D	Sialidase F1/R1 + probe	UNKNOWN	Undetermined			#VALUE!			3	39
I14	AF078A	Sialidase F1/R1 + probe	UNKNOWN	Undetermined			#VALUE!	#VALUE!	#VALUE!	3	39
J14	AF078A	Sialidase F1/R1 + probe	UNKNOWN	Undetermined			#VALUE!			3	39
K14	AF078B	Sialidase F1/R1 + probe	UNKNOWN	35.1097	35.1555	0.0648751	12.9598	12.61	0.494706	3	32
L14	AF078B	Sialidase F1/R1 + probe	UNKNOWN	35.2014	35.1555	0.0648751	12.2602			3	32
M14	AF078C	Sialidase F1/R1 + probe	UNKNOWN	35.4065	36.65	1.75853	10.8297	6.61791	5.95642	3	32
N14	AF078C	Sialidase F1/R1 + probe	UNKNOWN	37.8935	36.65	1.75853	2.40609			3	35
O14	AF078D	Sialidase F1/R1 + probe	UNKNOWN	Undetermined			#VALUE!	#VALUE!	#VALUE!	3	39
P14	AF078D	Sialidase F1/R1 + probe	UNKNOWN	Undetermined			#VALUE!			3	39
A15	AF084A	Sialidase F1/R1 + probe	UNKNOWN	Undetermined			#VALUE!	#VALUE!	#VALUE!	3	39
B15	AF084A	Sialidase F1/R1 + probe	UNKNOWN	Undetermined			#VALUE!			3	39
C15	AF084B	Sialidase F1/R1 + probe	UNKNOWN	Undetermined	37.2443		#VALUE!	#VALUE!	#VALUE!	3	39
D15	AF084B	Sialidase F1/R1 + probe	UNKNOWN	37.2443	37.2443		3.56316			3	34
E15	AF084C	Sialidase F1/R1 + probe	UNKNOWN	Undetermined			#VALUE!	#VALUE!	#VALUE!	3	39
F15	AF084C	Sialidase F1/R1 + probe	UNKNOWN	Undetermined			#VALUE!			3	39
G15	AF084D	Sialidase F1/R1 + probe	UNKNOWN	Undetermined			#VALUE!	#VALUE!	#VALUE!	3	39
H15	AF084D	Sialidase F1/R1 + probe	UNKNOWN	Undetermined			#VALUE!			3	39
I15	AF085A	Sialidase F1/R1 + probe	UNKNOWN	Undetermined	35.3763		#VALUE!	#VALUE!	#VALUE!	3	39
J15	AF085A	Sialidase F1/R1 + probe	UNKNOWN	35.3763	35.3763		11.0293			3	32
K15	AF085B	Sialidase F1/R1 + probe	UNKNOWN	37.2773	37.2773		3.49283	#VALUE!	#VALUE!	3	34
L15	AF085B	Sialidase F1/R1 + probe	UNKNOWN	Undetermined	37.2773		#VALUE!			3	39
M15	AF085C	Sialidase F1/R1 + probe	UNKNOWN	Undetermined	35.7984		#VALUE!	#VALUE!	#VALUE!	3	39
N15	AF085C	Sialidase F1/R1 + probe	UNKNOWN	35.7984	35.7984		8.54403			3	33
O15	AF085D	Sialidase F1/R1 + probe	UNKNOWN	Undetermined			#VALUE!	#VALUE!	#VALUE!	3	39
P15	AF085D	Sialidase F1/R1 + probe	UNKNOWN	Undetermined			#VALUE!			3	39
A16	AF087A	Sialidase F1/R1 + probe	UNKNOWN	35.7569	35.8513	0.133451	8.76144	8.28884	0.668361	3	32
B16	AF087A	Sialidase F1/R1 + probe	UNKNOWN	35.9456	35.8513	0.133451	7.81624			3	33
C16	AF087B	Sialidase F1/R1 + probe	UNKNOWN	Undetermined			#VALUE!	#VALUE!	#VALUE!	3	39
D16	AF087B	Sialidase F1/R1 + probe	UNKNOWN	Undetermined			#VALUE!			3	39
E16	AF087C	Sialidase F1/R1 + probe	UNKNOWN	Undetermined	35.8721		#VALUE!	#VALUE!	#VALUE!	3	39
F16	AF087C	Sialidase F1/R1 + probe	UNKNOWN	35.8721	35.8721		8.17164			3	33
G16	AF087D	Sialidase F1/R1 + probe	UNKNOWN	35.7278	35.8041	0.107931	8.91696	8.52375	0.556076	3	32
H16	AF087D	Sialidase F1/R1 + probe	UNKNOWN	35.8804	35.8041	0.107931	8.13055			3	33
I16	AF090A	Sialidase F1/R1 + probe	UNKNOWN	Undetermined	35.8633		#VALUE!	#VALUE!	#VALUE!	3	39
J16	AF090A	Sialidase F1/R1 + probe	UNKNOWN	35.8633	35.8633		8.21539			3	33
K16	AF090B	Sialidase F1/R1 + probe	UNKNOWN	35.9693	35.9693		7.70527	#VALUE!	#VALUE!	3	33
L16	AF090B	Sialidase F1/R1 + probe	UNKNOWN	Undetermined	35.9693		#VALUE!			3	39
M16	AF090C	Sialidase F1/R1 + probe	UNKNOWN	Undetermined			#VALUE!	#VALUE!	#VALUE!	3	39
N16	AF090C	Sialidase F1/R1 + probe	UNKNOWN	Undetermined			#VALUE!			3	39
O16	AF090D	Sialidase F1/R1 + probe	UNKNOWN	36.1642	35.5478	0.871618	6.84842	10.6415	5.36418	3	33
P16	AF090D	Sialidase F1/R1 + probe	UNKNOWN	34.9315	35.5478	0.871618	14.4345			3	32
A17	AF092A	Sialidase F1/R1 + probe	UNKNOWN	Undetermined			#VALUE!	#VALUE!	#VALUE!	3	39
B17	AF092A	Sialidase F1/R1 + probe	UNKNOWN	Undetermined			#VALUE!			3	39
C17	AF092B	Sialidase F1/R1 + probe	UNKNOWN	23.4655	23.3753	0.127646	14840.7	15696.8	1210.75	3	20
D17	AF092B	Sialidase F1/R1 + probe	UNKNOWN	23.285	23.3753	0.127646	16552.9			3	20
E17	AF092C	Sialidase F1/R1 + probe	UNKNOWN	21.8539	21.8825	0.0405311	39339.4	38669.1	947.935	3	18
F17	AF092C	Sialidase F1/R1 + probe	UNKNOWN	21.9112	21.8825	0.0405311	37998.8			3	18
G17	AF092D	Sialidase F1/R1 + probe	UNKNOWN	20.066	20.0631	0.00406768	116008	116210	285.999	3	17
H17	AF092D	Sialidase F1/R1 + probe	UNKNOWN	20.0603	20.0631	0.00406768	116412			3	16
I17	AF093A	Sialidase F1/R1 + probe	UNKNOWN	Undetermined	35.8087		#VALUE!	#VALUE!	#VALUE!	3	39
J17	AF093A	Sialidase F1/R1 + probe	UNKNOWN	35.8087	35.8087		8.49118			3	33
K17	AF093B	Sialidase F1/R1 + probe	UNKNOWN	34.8806	34.8806		14.8858	#VALUE!	#VALUE!	3	32
L17	AF093B	Sialidase F1/R1 + probe	UNKNOWN	Undetermined	34.8806		#VALUE!			3	39
M17	AF093C	Sialidase F1/R1 + probe	UNKNOWN	Undetermined			#VALUE!	#VALUE!	#VALUE!	3	39
N17	AF093C	Sialidase F1/R1 + probe	UNKNOWN	Undetermined			#VALUE!			3	39
O17	AF093D	Sialidase F1/R1 + probe	UNKNOWN	35.2953	35.2953		11.5835	#VALUE!	#VALUE!	3	32
P17	AF093D	Sialidase F1/R1 + probe	UNKNOWN	Undetermined	35.2953		#VALUE!			3	39
A18	AF094A	Sialidase F1/R1 + probe	UNKNOWN	35.8065	35.4689	0.477334	8.50261	10.6465	3.03195	3	33
B18	AF094A	Sialidase F1/R1 + probe	UNKNOWN	35.1314	35.4689	0.477334	12.7904			3	32
C18	AF094B	Sialidase F1/R1 + probe	UNKNOWN	35.1812	35.1812		12.4113	#VALUE!	#VALUE!	3	32
D18	AF094B	Sialidase F1/R1 + probe	UNKNOWN	Undetermined	35.1812		#VALUE!			3	39
E18	AF094C	Sialidase F1/R1 + probe	UNKNOWN	36.0377	36.0377		7.39277	#VALUE!	#VALUE!	3	33
F18	AF094C	Sialidase F1/R1 + probe	UNKNOWN	Undetermined	36.0377		#VALUE!			3	39
G18	AF094D	Sialidase F1/R1 + probe	UNKNOWN	36.8557	36.4539	0.568309	4.50735	5.91824	1.99529	3	34
H18	AF094D	Sialidase F1/R1 + probe	UNKNOWN	36.052	36.4539	0.568309	7.32913			3	33
I18	AF103A	Sialidase F1/R1 + probe	UNKNOWN	33.9105	34.5808	0.947979	26.7678	19.3323	10.5153	3	31
J18	AF103A	Sialidase F1/R1 + probe	UNKNOWN	35.2512	34.5808	0.947979	11.8969			3	32
K18	AF103B	Sialidase F1/R1 + probe	UNKNOWN	Undetermined	36.9481		#VALUE!	#VALUE!	#VALUE!	3	39
L18	AF103B	Sialidase F1/R1 + probe	UNKNOWN	36.9481	36.9481		4.26228			3	34
M18	AF103C	Sialidase F1/R1 + probe	UNKNOWN	Undetermined			#VALUE!	#VALUE!	#VALUE!	3	39
N18	AF103C	Sialidase F1/R1 + probe	UNKNOWN	Undetermined			#VALUE!			3	39
O18	AF103D	Sialidase F1/R1 + probe	UNKNOWN	34.8765	35.8331	1.35282	14.9229	9.80697	7.23499	3	32
P18	AF103D	Sialidase F1/R1 + probe	UNKNOWN	36.7897	35.8331	1.35282	4.69106			3	34
A19	AF106A	Sialidase F1/R1 + probe	UNKNOWN	Undetermined	34.95		#VALUE!	#VALUE!	#VALUE!	3	39
B19	AF106A	Sialidase F1/R1 + probe	UNKNOWN	34.95	34.95		14.2739			3	32
C19	AF106B	Sialidase F1/R1 + probe	UNKNOWN	Undetermined			#VALUE!	#VALUE!	#VALUE!	3	39
D19	AF106B	Sialidase F1/R1 + probe	UNKNOWN	Undetermined			#VALUE!			3	39
E19	AF106C	Sialidase F1/R1 + probe	UNKNOWN	Undetermined			#VALUE!	#VALUE!	#VALUE!	3	39
F19	AF106C	Sialidase F1/R1 + probe	UNKNOWN	Undetermined			#VALUE!			3	39
G19	AF106D	Sialidase F1/R1 + probe	UNKNOWN	34.8215	34.8215		15.4275	#VALUE!	#VALUE!	3	32
H19	AF106D	Sialidase F1/R1 + probe	UNKNOWN	Undetermined	34.8215		#VALUE!			3	39
A24	Inf sialidase 2348-1	Sialidase F1/R1 + probe	STANDARD	13.2442	13.303	0.0830623	7.1868e+06	6.94034e+06	348552	3	10
B24	Inf sialidase 2348-1	Sialidase F1/R1 + probe	STANDARD	13.3617	13.303	0.0830623	6.69388e+06			3	10
C24	Inf sialidase 2348-2	Sialidase F1/R1 + probe	STANDARD	18.2729	18.3173	0.0629006	343194	334205	12712.5	3	15
D24	Inf sialidase 2348-2	Sialidase F1/R1 + probe	STANDARD	18.3618	18.3173	0.0629006	325215			3	15
E24	Inf sialidase 2348-3	Sialidase F1/R1 + probe	STANDARD	21.035	21.0884	0.0755312	64555.8	62536.2	2856.1	3	18
F24	Inf sialidase 2348-3	Sialidase F1/R1 + probe	STANDARD	21.1418	21.0884	0.0755312	60516.7			3	18
G24	Inf sialidase 2348-4	Sialidase F1/R1 + probe	STANDARD	25.3626	25.4187	0.079259	4710.82	4556.41	218.359	3	22
H24	Inf sialidase 2348-4	Sialidase F1/R1 + probe	STANDARD	25.4747	25.4187	0.079259	4402.01			3	22
I24	Inf sialidase 2348-5	Sialidase F1/R1 + probe	STANDARD	29.8901	30.4977	0.859384	304.624	225.336	112.13	3	27
J24	Inf sialidase 2348-5	Sialidase F1/R1 + probe	STANDARD	31.1054	30.4977	0.859384	146.048			3	28
K24	Inf sialidase 2348-6	Sialidase F1/R1 + probe	STANDARD	36.1098	34.4342	2.36973	7.07721	7.07721	#DIV/0!	3	33
L24	Inf sialidase 2348-6	Sialidase F1/R1 + probe	STANDARD	32.7585	34.4342	2.36973				3	30
M24	NTC	Sialidase F1/R1 + probe	NTC	Undetermined						3	39
N24	NTC	Sialidase F1/R1 + probe	NTC	Undetermined						3	39
O24	NTC	Sialidase F1/R1 + probe	NTC	Undetermined						3	39
P24	NTC	Sialidase F1/R1 + probe	NTC	Undetermined						3	39

[truncated: 7 more sheets: Infantis_P3, Infantis_P4, Standards, Summary, Aus_babies_for_paper, Singapore_for_paper, Chinese_for_paper]
