# Supplementary material for: Differentiation of Bifidobacterium longum subspecies longum and infantis by quantitative PCR using functional gene targets
Source: PeerJ. 2017 May 25;5:e3375. doi: 10.7717/peerj.3375 (PMC5446769; doi:10.7717/peerj.3375)
Supplement: Data S2 [file peerj-05-3375-s003.xlsx]

## Sheet: Results
Block Type	384-Well Block
Calibration Background is expired	Yes
Calibration Background performed on	2015-09-28 10:38:58 AM NZDT
Calibration FAM is expired	Yes
Calibration FAM performed on	2015-09-28 12:44:37 PM NZDT
Calibration NED is expired	Yes
Calibration NED performed on	2015-09-28 12:27:45 PM NZDT
Calibration ROI is expired	Yes
Calibration ROI performed on	2015-09-28 10:31:42 AM NZDT
Calibration ROX is expired	Yes
Calibration ROX performed on	2015-09-28 11:50:26 AM NZDT
Calibration SYBR is expired	Yes
Calibration SYBR performed on	2015-09-28 11:35:56 AM NZDT
Calibration TAMRA is expired	Yes
Calibration TAMRA performed on	2015-09-28 12:05:53 PM NZDT
Calibration Uniformity is expired	Yes
Calibration Uniformity performed on	2015-09-28 11:17:29 AM NZDT
Calibration VIC is expired	Yes
Calibration VIC performed on	2015-09-28 12:36:53 PM NZDT
Chemistry	SYBR_GREEN
Experiment File Name	D:\Tannock\Extraction comparisons.eds
Experiment Name	Extraction comparisons
Experiment Run Start Time	2016-08-01 23:54:44 PM NZST
Experiment Run Stop Time	2016-08-02 00:51:10 AM NZST
Experiment Type	Standard Curve
Instrument Name	ViiA7
Instrument Serial Number	278880388
Instrument Type	ViiA(TM) 7 System
Passive Reference	ROX
Quantification Cycle Method	Ct
Signal Smoothing On	true
Stage/ Cycle where Analysis is performed	Stage 2, Step 2
												Delta Ct			2^DeltaCt							Table X: Comparison of DNA extraction methods
Well Position	Sample Name	Target Name	Task	CT	Ct Mean	Ct SD	Quantity	Quantity Mean	Quantity SD	Tm1	Tm2	Uni-Kinase Ct	Uni - Sial Ct		2^Uni-Kinase Ct	2^Uni-Sial Ct	Kin Av	Sial Av	Kin indiv	Sial indiv		Sample	Method	Longum relative abundance	Infantis relative abundance
M6	58550-MB	Kinase F/R + Probe	UNKNOWN	18.1533	18.0079	0.205554	0.158757	0.174294	0.0219729	92.2711		-6.71451	11.2934		105.019	0.000398422	0.517494	0	0.471362			58550	MoBio	51.75	0
N6	58550-MB	Kinase F/R + Probe	UNKNOWN	17.8626	18.0079	0.205554	0.189831	0.174294	0.0219729	91.0637									0.563625			58550	Phenol	34.07	0
M5	58550-PH	Kinase F/R + Probe	UNKNOWN	14.7043	14.6375	0.0945135	1.32385	1.38056	0.0801931	92.137		-7.5987	7.03876		193.837	0.00760541	0.340691	0	0.326697			58550	Qiagen	66.85	0
N5	58550-PH	Kinase F/R + Probe	UNKNOWN	14.5706	14.6375	0.0945135	1.43726	1.38056	0.0801931	90.6612									0.354684			AF26B	MoBio	1.66	0.14
M7	58550-Q	Kinase F/R + Probe	UNKNOWN	20.3704	20.3441	0.0371526	0.040609	0.0412758	0.000942933	89.7221		-5.77113	-21.8978		54.6113	3.90744e+06	0.668507	7.28937e-06	0.657708			AF26B	Phenol	0.18	0.19
N7	58550-Q	Kinase F/R + Probe	UNKNOWN	20.3178	20.3441	0.0371526	0.0419425	0.0412758	0.000942933	92.5395									0.679306			AF26B	Qiagen	0.72	0.62
A6	AF12A-MB	Kinase F/R + Probe	UNKNOWN	15.4279	15.4673	0.0557808	0.848391	0.828304	0.0284068	93.0761		-5.67459	9.79272		51.0765	0.00112745	0.786087	0	0.80515			AF12A	MoBio	78.61	0
B6	AF12A-MB	Kinase F/R + Probe	UNKNOWN	15.5068	15.4673	0.0557808	0.808218	0.828304	0.0284068	92.9419									0.767024			AF12A	Phenol	75.17	0
A5	AF12A-PH	Kinase F/R + Probe	UNKNOWN	15.7287	15.7777	0.0692577	0.705095	0.684487	0.0291431	92.8078		-6.14782	-24.9188		70.9054	3.17175e+07	0.751712	0	0.774343			AF12A	Qiagen	75.77	0
B5	AF12A-PH	Kinase F/R + Probe	UNKNOWN	15.8267	15.7777	0.0692577	0.66388	0.684487	0.0291431	92.8078									0.729081			AF92A	MoBio	0.2	0
A7	AF12A-Q	Kinase F/R + Probe	UNKNOWN	16.255	16.2313	0.0335462	0.510157	0.517709	0.010679	91.7345		-6.14777	10.0835		70.9028	0.000921658	0.757661	0	0.74661			AF92A	Phenol	0.02	0
B7	AF12A-Q	Kinase F/R + Probe	UNKNOWN	16.2075	16.2313	0.0335462	0.52526	0.517709	0.010679	92.8078									0.768712			AF92A	Qiagen	0.06	0
E6	AF26B-MB	Kinase F/R + Probe	UNKNOWN	20.1023	20.0791	0.0327882	0.0478871	0.0485797	0.000979435	92.6736		-12.4811	-25.1456		5717.23	3.71171e+07	0.016633	0.00131222	0.0161167	0.00133535
F6	AF26B-MB	Kinase F/R + Probe	UNKNOWN	20.0559	20.0791	0.0327882	0.0492722	0.0485797	0.000979435	92.9419									0.0165829	0.00143763
E5	AF26B-PH	Kinase F/R + Probe	UNKNOWN	24.0281	24.1081	0.113268	0.00428335	0.00408244	0.000284124	89.1855		-16.0507	-24.4468		67881	2.28676e+07	0.00182806	2.87643e-06	0.0019695	0.00186917
F5	AF26B-PH	Kinase F/R + Probe	UNKNOWN	24.1882	24.1081	0.113268	0.00388153	0.00408244	0.000284124	92.0028									0.00178474	0.00178474
E7	AF26B-Q	Kinase F/R + Probe	UNKNOWN	23.4497	23.6183	0.238428	0.0061128	0.00554044	0.000809437	93.0761		-13.7443	-24.9265		13723	3.18878e+07	0.00717404	9.27998e-07	0.00816161	0.00816161
F7	AF26B-Q	Kinase F/R + Probe	UNKNOWN	23.7869	23.6183	0.238428	0.00496808	0.00554044	0.000809437	92.137									0.00663322	0.00624437
I6	AF92A-MB	Kinase F/R + Probe	UNKNOWN	32.0911	31.9829	0.152984	3.00895e-05	3.22303e-05	3.02765e-06	93.2103		-15.4806	16.5024		45721	1.07718e-05	0.00198526	0	0.00185339	0
J6	AF92A-MB	Kinase F/R + Probe	UNKNOWN	31.8748	31.9829	0.152984	3.43712e-05	3.22303e-05	3.02765e-06	92.6736									0.00211713	0
I5	AF92A-PH	Kinase F/R + Probe	UNKNOWN	34.6911	35.1161	0.601129	6.08221e-05	4.8441e-06	1.75096e-06	92.4053		-24.5546	-21.6811		2.46411e+07	3.36247e+06	0.000179296	6.49389e-06	0.000164134	4.91867e-06
J5	AF92A-PH	Kinase F/R + Probe	UNKNOWN	35.5412	35.1161	0.601129	7.20598e-05	4.8441e-06	1.75096e-06	89.4538									0.000194459	2.28284e-05
I7	AF92A-Q	Kinase F/R + Probe	UNKNOWN	28.5066	28.5553	0.06887	0.000272716	0.000264789	1.12107e-05	89.588		-17.9268	10.6285		249178	0.000631684	0.000587608	0	0.0006052	0
J7	AF92A-Q	Kinase F/R + Probe	UNKNOWN	28.604	28.5553	0.06887	0.000256862	0.000264789	1.12107e-05	88.9172									0.000570016	0
A8	Long kinase 0274-1	Kinase F/R + Probe	STANDARD	15.0204	15.0156	0.00681093	1			89.9905
B8	Long kinase 0274-1	Kinase F/R + Probe	STANDARD	15.0108	15.0156	0.00681093	1			81.2702
C8	Long kinase 0274-2	Kinase F/R + Probe	STANDARD	18.6012	19.1143	0.725541	0.1			90.3929
D8	Long kinase 0274-2	Kinase F/R + Probe	STANDARD	19.6273	19.1143	0.725541	0.1			93.0761
E8	Long kinase 0274-3	Kinase F/R + Probe	STANDARD	22.125	22.2588	0.189166	0.01			87.8439
F8	Long kinase 0274-3	Kinase F/R + Probe	STANDARD	22.3925	22.2588	0.189166	0.01			89.1855
G8	Long kinase 0274-4	Kinase F/R + Probe	STANDARD	26.7916	26.8741	0.116668	0.001			92.4053
H8	Long kinase 0274-4	Kinase F/R + Probe	STANDARD	26.9566	26.8741	0.116668	0.001			81.6727
I8	Long kinase 0274-5	Kinase F/R + Probe	STANDARD	30.2468	30.2379	0.0125928	0.0001			92.5395
J8	Long kinase 0274-5	Kinase F/R + Probe	STANDARD	30.229	30.2379	0.0125928	0.0001			83.1484
K8	Long kinase 0274-6	Kinase F/R + Probe	STANDARD	33.9081	33.6295	0.394006	1e-05			82.7459
L8	Long kinase 0274-6	Kinase F/R + Probe	STANDARD	33.3509	33.6295	0.394006	1e-05			87.5756
M8	NTC	Kinase F/R + Probe	NTC	Undetermined						90.5271
N8	NTC	Kinase F/R + Probe	NTC	Undetermined						90.7954
O8	NTC	Kinase F/R + Probe	NTC	Undetermined						89.7221
P8	NTC	Kinase F/R + Probe	NTC	Undetermined						82.3435
M2	58550-MB	Sialidase F/R 1 +probe	UNKNOWN	Undetermined						90.1246
N2	58550-MB	Sialidase F/R 1 +probe	UNKNOWN	Undetermined						93.6127
M1	58550-PH	Sialidase F/R 1 +probe	UNKNOWN	Undetermined						92.137
N1	58550-PH	Sialidase F/R 1 +probe	UNKNOWN	Undetermined						89.8563
M3	58550-Q	Sialidase F/R 1 +probe	UNKNOWN	36.4708	36.4708		3.69657e-07	3.69657e-07		92.8078
N3	58550-Q	Sialidase F/R 1 +probe	UNKNOWN	Undetermined	36.4708					87.3073
A2	AF12A-MB	Sialidase F/R 1 +probe	UNKNOWN	Undetermined						92.2711
B2	AF12A-MB	Sialidase F/R 1 +probe	UNKNOWN	Undetermined						92.4053
A1	AF12A-PH	Sialidase F/R 1 +probe	UNKNOWN	Undetermined	34.5486					93.0761
B1	AF12A-PH	Sialidase F/R 1 +probe	UNKNOWN	34.5486	34.5486		1.25852e-06	1.25852e-06		92.9419
A3	AF12A-Q	Sialidase F/R 1 +probe	UNKNOWN	Undetermined						91.332
B3	AF12A-Q	Sialidase F/R 1 +probe	UNKNOWN	Undetermined						93.3444
E2	AF26B-MB	Sialidase F/R 1 +probe	UNKNOWN	32.8015	32.7436	0.0818795	0.00383257	3.97935e-06	2.07581e-07	86.0999
F2	AF26B-MB	Sialidase F/R 1 +probe	UNKNOWN	32.6857	32.7436	0.0818795	0.00412613	3.97935e-06	2.07581e-07	88.9172
E1	AF26B-PH	Sialidase F/R 1 +probe	UNKNOWN	31.9912	32.5042	0.725518	6.42366e-06	4.8819e-06	2.18037e-06	91.332
F1	AF26B-PH	Sialidase F/R 1 +probe	UNKNOWN	33.0172	32.5042	0.725518	3.34015e-06	4.8819e-06	2.18037e-06	84.2217
E3	AF26B-Q	Sialidase F/R 1 +probe	UNKNOWN	35.432	34.8005	0.893152	7.16683e-07	1.1599e-06	6.26807e-07	93.0761
F3	AF26B-Q	Sialidase F/R 1 +probe	UNKNOWN	34.1689	34.8005	0.893152	1.60312e-06	1.1599e-06	6.26807e-07	92.5395
I2	AF92A-MB	Sialidase F/R 1 +probe	UNKNOWN	Undetermined						90.5271
J2	AF92A-MB	Sialidase F/R 1 +probe	UNKNOWN	Undetermined						92.9419
I1	AF92A-PH	Sialidase F/R 1 +probe	UNKNOWN	32.926	32.2426	0.966408	3.54015e-06	5.99977e-06	3.47842e-06	91.4662
J1	AF92A-PH	Sialidase F/R 1 +probe	UNKNOWN	31.5593	32.2426	0.966408	8.45939e-06	5.99977e-06	3.47842e-06	92.2711
I3	AF92A-Q	Sialidase F/R 1 +probe	UNKNOWN	Undetermined						90.3929
J3	AF92A-Q	Sialidase F/R 1 +probe	UNKNOWN	Undetermined						93.4786
A4	Inf sialidase 2348-1	Sialidase F/R 1 +probe	STANDARD	13.2638	13.2724	0.0121983	1			82.7459
B4	Inf sialidase 2348-1	Sialidase F/R 1 +probe	STANDARD	13.2811	13.2724	0.0121983	1			93.0761
C4	Inf sialidase 2348-2	Sialidase F/R 1 +probe	STANDARD	16.8218	16.7773	0.0629047	0.1			93.0761
D4	Inf sialidase 2348-2	Sialidase F/R 1 +probe	STANDARD	16.7328	16.7773	0.0629047	0.1			92.9419
E4	Inf sialidase 2348-3	Sialidase F/R 1 +probe	STANDARD	20.4638	20.4432	0.029109	0.01			90.1246
F4	Inf sialidase 2348-3	Sialidase F/R 1 +probe	STANDARD	20.4226	20.4432	0.029109	0.01			92.2711
G4	Inf sialidase 2348-4	Sialidase F/R 1 +probe	STANDARD	24.0332	24.0774	0.0624771	0.001			92.6736
H4	Inf sialidase 2348-4	Sialidase F/R 1 +probe	STANDARD	24.1216	24.0774	0.0624771	0.001			92.9419
I4	Inf sialidase 2348-5	Sialidase F/R 1 +probe	STANDARD	27.596	27.8042	0.294453	0.0001			92.8078
J4	Inf sialidase 2348-5	Sialidase F/R 1 +probe	STANDARD	28.0124	27.8042	0.294453	0.0001			89.3197
K4	Inf sialidase 2348-6	Sialidase F/R 1 +probe	STANDARD	31.2867	31.2177	0.0975514	1e-05			91.8687
L4	Inf sialidase 2348-6	Sialidase F/R 1 +probe	STANDARD	31.1487	31.2177	0.0975514	1e-05			90.1246
M4	NTC	Sialidase F/R 1 +probe	NTC	Undetermined						92.8078
N4	NTC	Sialidase F/R 1 +probe	NTC	Undetermined						91.8687
O4	NTC	Sialidase F/R 1 +probe	NTC	Undetermined						93.2103
P4	NTC	Sialidase F/R 1 +probe	NTC	Undetermined						90.7954
M10	58550-MB	SYBR uni	UNKNOWN	11.3406	11.2934	0.0667491	0.327514	0.336804	0.0131391	83.8192
N10	58550-MB	SYBR uni	UNKNOWN	11.2462	11.2934	0.0667491	0.346095	0.336804	0.0131391	83.8192
M9	58550-PH	SYBR uni	UNKNOWN	7.10126	7.03876	0.0883934	3.90423	4.05222	0.209301	83.5509
N9	58550-PH	SYBR uni	UNKNOWN	6.97626	7.03876	0.0883934	4.20022	4.05222	0.209301	83.5509
M11	58550-Q	SYBR uni	UNKNOWN	14.9511	14.573	0.534783	0.0396805	0.0507118	0.0156007	83.8192
N11	58550-Q	SYBR uni	UNKNOWN	14.1948	14.573	0.534783	0.0617432	0.0507118	0.0156007	83.685
A10	AF12A-MB	SYBR uni	UNKNOWN	9.34171	9.79272	0.637819	1.05371	0.837797	0.305341	83.5509
B10	AF12A-MB	SYBR uni	UNKNOWN	10.2437	9.79272	0.637819	0.621888	0.837797	0.305341	83.685
A9	AF12A-PH	SYBR uni	UNKNOWN	9.26597	9.62987	0.514627	1.10141	0.910572	0.269883	84.0875
B9	AF12A-PH	SYBR uni	UNKNOWN	9.99377	9.62987	0.514627	0.719736	0.910572	0.269883	83.9534
A11	AF12A-Q	SYBR uni	UNKNOWN	10.1372	10.0835	0.0760309	0.661831	0.683299	0.0303605	83.8192
B11	AF12A-Q	SYBR uni	UNKNOWN	10.0297	10.0835	0.0760309	0.704767	0.683299	0.0303605	83.685
E10	AF26B-MB	SYBR uni	UNKNOWN	7.56837	7.598	0.0419064	2.97128	2.92069	0.0715441	82.4776
F10	AF26B-MB	SYBR uni	UNKNOWN	7.62764	7.598	0.0419064	2.8701	2.92069	0.0715441	82.6118
E9	AF26B-PH	SYBR uni	UNKNOWN	8.0127	8.05742	0.0632419	2.29157	2.23321	0.0825441	82.7459
F9	AF26B-PH	SYBR uni	UNKNOWN	8.10214	8.05742	0.0632419	2.17484	2.23321	0.0825441	82.6118
E11	AF26B-Q	SYBR uni	UNKNOWN	9.92566	9.87399	0.0730698	0.74897	0.772289	0.032979	82.6118
F11	AF26B-Q	SYBR uni	UNKNOWN	9.82232	9.87399	0.0730698	0.795609	0.772289	0.032979	82.6118
I10	AF92A-MB	SYBR uni	UNKNOWN	16.7803	16.5024	0.393105	0.0136197	0.0162348	0.00369835	82.4776
J10	AF92A-MB	SYBR uni	UNKNOWN	16.2244	16.5024	0.393105	0.0188499	0.0162348	0.00369835	82.6118
I9	AF92A-PH	SYBR uni	UNKNOWN	9.99376	10.5616	0.802989	0.719739	0.545152	0.246903	83.0142
J9	AF92A-PH	SYBR uni	UNKNOWN	11.1294	10.5616	0.802989	0.370565	0.545152	0.246903	83.0142
I11	AF92A-Q	SYBR uni	UNKNOWN	10.4623	10.6285	0.235123	0.547308	0.498965	0.0683678	82.8801
J11	AF92A-Q	SYBR uni	UNKNOWN	10.7948	10.6285	0.235123	0.450621	0.498965	0.0683678	82.8801
A12	Long kinase 0274-1	SYBR uni	STANDARD	9.60059	9.59048	0.0143036	1			84.0875
B12	Long kinase 0274-1	SYBR uni	STANDARD	9.58037	9.59048	0.0143036	1			83.9534
C12	Long kinase 0274-2	SYBR uni	STANDARD	13.4527	13.4527		0.1			83.5509
D12	Long kinase 0274-2	SYBR uni	STANDARD	Undetermined	13.4527		0.1			70.8059
E12	Long kinase 0274-3	SYBR uni	STANDARD	17.0786	17.0373	0.058516	0.01			84.2217
F12	Long kinase 0274-3	SYBR uni	STANDARD	16.9959	17.0373	0.058516	0.01			83.685
H12	Long kinase 0274-4	SYBR uni	STANDARD	20.8823	20.8823		0.001			83.9534
J12	Long kinase 0274-5	SYBR uni	STANDARD	25.6245	25.6245		0.0001			84.0875
K12	Long kinase 0274-6	SYBR uni	STANDARD	29.1952	29.1952		1e-05			84.3558
M12	NTC	SYBR uni	NTC	Undetermined						74.8306	61.6831
N12	NTC	SYBR uni	NTC	38.9721						74.294
O12	NTC	SYBR uni	NTC	39.4034						74.1598
P12	NTC	SYBR uni	NTC	36.2163						74.5623
