# Supplementary material for: Differentiation of Bifidobacterium longum subspecies longum and infantis by quantitative PCR using functional gene targets
Source: PeerJ journal article supplement (doi:10.7717/peerj.3375), 2017-05-25
Supplement: Figure_S1.pdf [file Figure_S1.pdf]

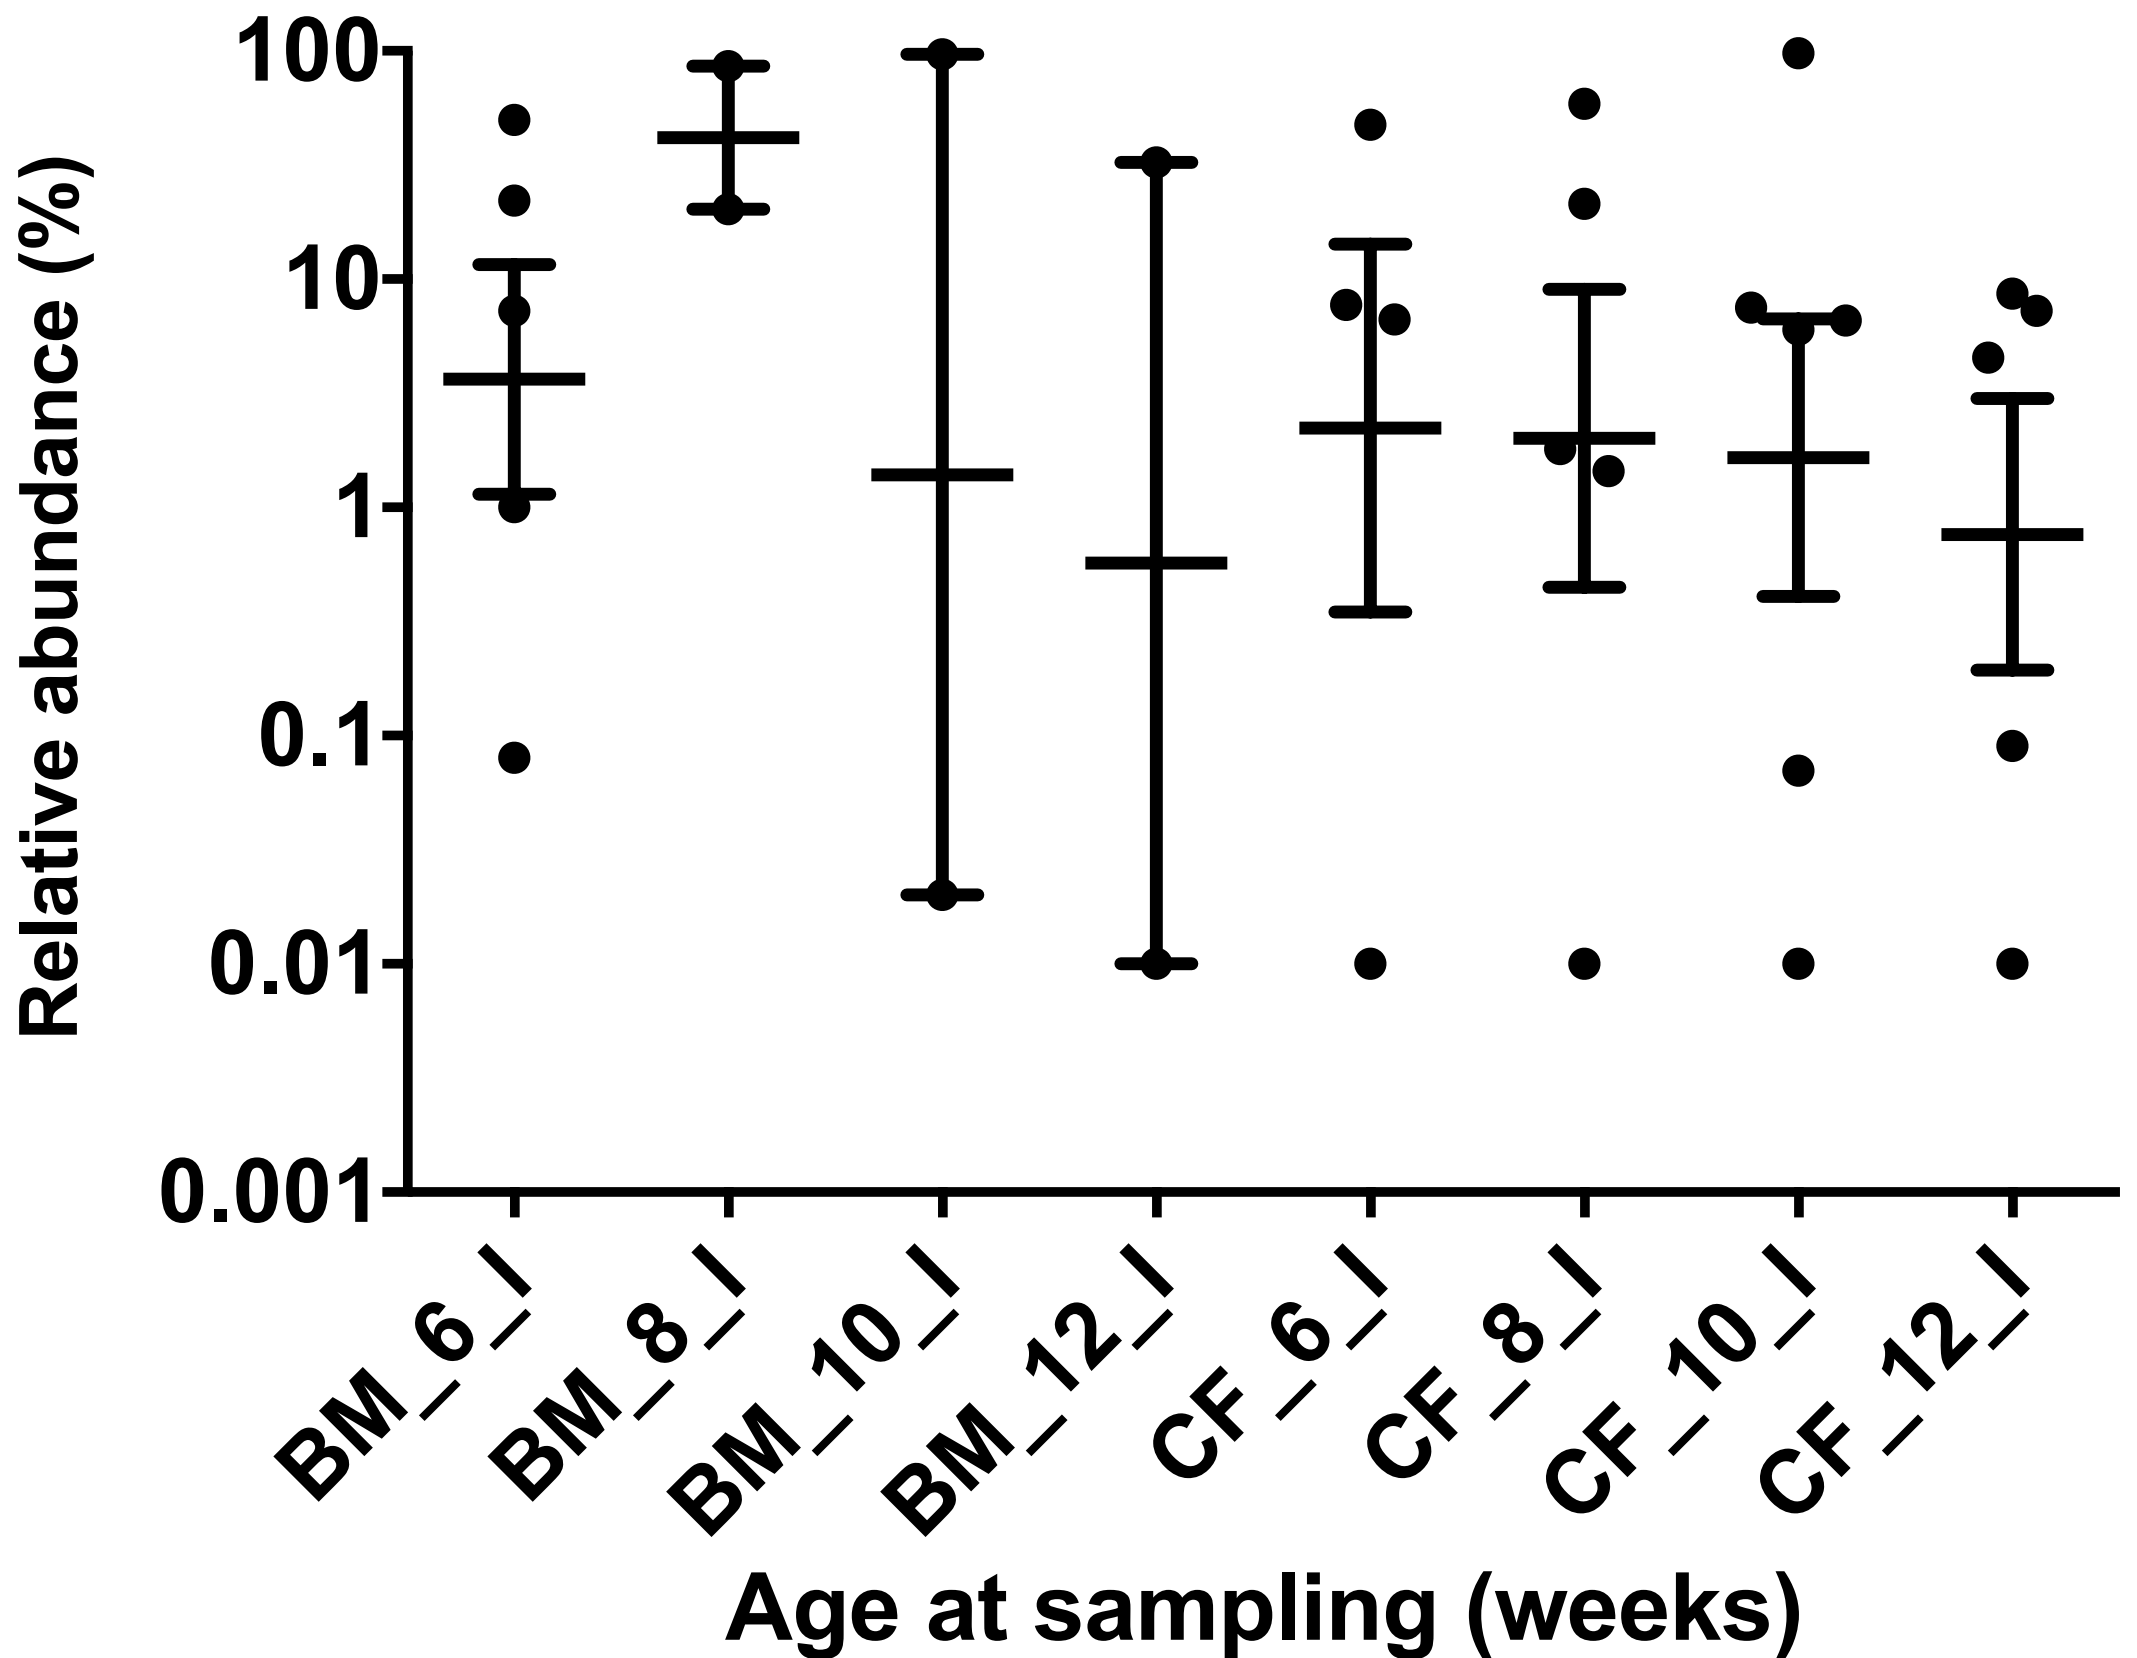

**Figure S1.** Effect of baby nutrition (breast milk, cow's milk formula) on relative abundances of *B. longum* subsp. *infantis* in the feces of caesarean-delivered Chinese children. The relative abundance (*B. longum* subsp. *infantis* abundance/Total 16S rRNA gene target abundance) data was normalized by log transformation and evaluated statistically by one-way ANOVA with multiple comparisons. Scatter plots with means and SEM are shown. The test limit of detection was 0.01% relative abundance.
